# Supplementary material for: Proteomic changes of the bovine blood plasma in response to heat stress in a tropically adapted cattle breed
Source: Front Genet. 2024 Aug 1;15:1392670. doi: 10.3389/fgene.2024.1392670 (PMC11324462; doi:10.3389/fgene.2024.1392670)
Supplement: Supplementary file 6 [file Table5.XLSX]

## Sheet: A. String protein annotations
#node	identifier	domain_summary_url	annotation	other_names_and_aliases
A2M	9913.ENSBTAP00000006167	Alpha-2-macroglobulin; Is able to inhibit all four classes of proteinases by a unique 'trapping' mechanism. This protein has a peptide stretch, called the 'bait region' which contains specific cleavage sites for different proteinases. When a proteinase cleaves the bait region, a conformational change is induced in the protein which traps the proteinase. The entrapped enzyme remains active against…	https://smart.embl.de/smart/DDvec.cgi?smart=478:Pfam_A2M_comp(13|267)+A2M_recep(377|463)+	1AYO,513856,A0A3Q1LMP7,A0A452DI08,A2M,A2M-201,A2M-202,A2MG_BOVIN,A8E647,Alpha-2-M,Alpha-2-macroglobulin,Alpha-2-macroglobulin precursor,ENSBTAG00000018137,ENSBTAP00000006167,ENSBTAP00000024146,ENSBTAP00000037567,ENSBTAP00000057998,ENSBTAT00000006167,ENSBTAT00000024146,ENSBTAT00000037743,ENSBTAT00000075123,NM_001109795.1,NP_001103265,NP_001103265.1,Q7SIH1,R-BTA-109582,R-BTA-114608,R-BTA-140837,R-B…
ABCB5	9913.ENSBTAP00000060000	ATP binding cassette subfamily B member 5.	https://smart.embl.de/smart/DDvec.cgi?smart=1270:Pfam_ABC_membrane(98|359)+AAA(435|629)+Pfam_ABC_membrane(705|979)+AAA(1055|1265)+	536724,A0A3Q1LL44,A0A3Q1LS24,A0A3Q1LS24_BOVIN,A0A3Q1LY02,A0A3Q1M250,A0A3Q1M521,A0A3Q1M7S7,A0A3Q1MDV0,A0A3Q1MGK6,A0A3Q1N3Y6,ABCB5,ABCB5-201,ABCB5-202,ABCB5-203,ABCB5-204,ABCB5-205,ABCB5-206,ABCB5-207,ABCB5-208,ABCB5-209,ABCB5-210,ATP binding cassette subfamily B member 5,ATP-binding cassette sub-family B member 5,ENSBTAG00000002595,ENSBTAP00000003363,ENSBTAP00000031647,ENSBTAP00000044939,ENSBTAP00…
ABTB2	9913.ENSBTAP00000007781	Ankyrin repeat and BTB domain containing 2.	https://smart.embl.de/smart/DDvec.cgi?smart=1191:ANK(687|716)+ANK(733|762)+ANK(772|801)+ANK(815|844)+ANK(882|913)+BTB(1011|1113)+	528597,ABTB2,ABTB2-201,Ankyrin repeat and BTB domain containing 2,E1BMN7,E1BMN7_BOVIN,ENSBTAG00000005923,ENSBTAP00000007781,ENSBTAP00000039458,ENSBTAT00000007781,ENSBTAT00000039669,UPI000FC49BC0,XM_003587004,XM_003587004.5,XM_024975898,XM_024975898.1,XP_003587052,XP_003587052.4,XP_024831666,XP_024831666.1,bta:528597
ACADL	9913.ENSBTAP00000013988	Acyl-Coenzyme A dehydrogenase, long chain.	https://smart.embl.de/smart/DDvec.cgi?smart=430:Pfam_Acyl-CoA_dh_N(54|165)+Pfam_Acyl-CoA_dh_M(169|266)+Pfam_Acyl-CoA_dh_2(293|416)+	1.3.8.8,614508,AAI23881.1,ACADL,ACADL-201,Acyl-CoA dehydrogenase long chain,Acyl-Coenzyme A dehydrogenase, long chain,BC123880,EC 1.3.8.8,ENSBTAG00000010579,ENSBTAP00000013988,ENSBTAT00000013988,F1MN00,Long-chain-acyl-CoA dehydrogenase,NM_001076936,NM_001076936.1,NP_001070404,NP_001070404.1,Q08D92,Q08D92_BOVIN,R-BTA-1430728,R-BTA-556833,R-BTA-77285,R-BTA-77286,R-BTA-77289,R-BTA-77310,R-BTA-897886…
ACP2	9913.ENSBTAP00000027968	Lysosomal acid phosphatase.	https://smart.embl.de/smart/DDvec.cgi?smart=423:SIGNAL(1|30)+Pfam_His_Phos_2(49|330)+TRANS(382|404)+	3.1.3.2,535407,AAI20139.1,ACP2,ACP2-201,Acid phosphatase 2, lysosomal,BC120138,EC 3.1.3.2,ENSBTAG00000021002,ENSBTAP00000027968,ENSBTAT00000027968,LAP,Lysosomal acid phosphatase,Lysosomal acid phosphatase isoform 1 precursor,NM_001076058,NM_001076058.2,NM_001076058.3,NM_001357044,NM_001357044.1,NP_001069526,NP_001069526.1,NP_001343973,NP_001343973.1,PPAL_BOVIN,Q0P5F0,UPI00005BE4FF,XM_005216483,XM…
ADGRL1	9913.ENSBTAP00000073270	Adhesion G protein-coupled receptor L1; Calcium-independent receptor of high affinity for alpha- latrotoxin, an excitatory neurotoxin present in black widow spider venom which triggers massive exocytosis from neurons and neuroendocrine cells. Receptor for TENM2 that mediates heterophilic synaptic cell-cell contact and postsynaptic specialization. Receptor probably implicated in the regulation of …	https://smart.embl.de/smart/DDvec.cgi?smart=1501:SIGNAL(1|21)+Pfam_Gal_Lectin(48|128)+OLF(171|427)+HormR(505|570)+Pfam_GAIN(578|802)+GPS(826|878)+Pfam_7tm_2(885|1121)+Pfam_Latrophilin(1141|1501)+	788252,A0A3Q1MN27,A0A452DHZ2,ADGRL1,ADGRL1-201,ADGRL1-202,ADGRL1-203,ADGRL1-204,AGRL1_BOVIN,Adhesion G protein-coupled receptor L1,Adhesion G protein-coupled receptor L1 precursor,CIRL-1,Calcium-independent alpha-latrotoxin receptor 1,DAAA02019342,DAAA02019343,DAAA02019344,DAAA02019345,ENSBTAG00000003675,ENSBTAP00000004789,ENSBTAP00000036113,ENSBTAP00000073270,ENSBTAP00000074250,ENSBTAT0000000478…
ADGRV1	9913.ENSBTAP00000007926	Adhesion G protein-coupled receptor V1; Belongs to the G-protein coupled receptor 2 family.	https://smart.embl.de/smart/DDvec.cgi?smart=6307:Calx_beta(21|117)+Calx_beta(133|237)+Calx_beta(252|363)+Pfam_Calx-beta(379|488)+Pfam_Calx-beta(519|615)+Pfam_Calx-beta(667|746)+Pfam_Calx-beta(876|979)+Calx_beta(993|1093)+Pfam_Calx-beta(1107|1208)+Pfam_Laminin_G_3(1336|1496)+Pfam_Calx-beta(1497|1546)+Calx_beta(1562|1666)+Calx_beta(1710|1809)+Calx_beta(1850|1952)+Calx_beta(1966|2079)+Calx_beta(2107…	537034,A0A3Q1LGR6,A0A3Q1LLR7,A0A3Q1M7H4,A0A3Q1MQP7,ADGRV1,ADGRV1-201,ADGRV1-202,ADGRV1-203,ADGRV1-204,ADGRV1-205,Adhesion G protein-coupled receptor V1,Adhesion G-protein coupled receptor V1,ENSBTAG00000006031,ENSBTAP00000007926,ENSBTAP00000039722,ENSBTAP00000057723,ENSBTAP00000057729,ENSBTAP00000066325,ENSBTAP00000074360,ENSBTAT00000007926,ENSBTAT00000039938,ENSBTAT00000071555,ENSBTAT00000077102…
ADIPOQ	9913.ENSBTAP00000065019	Adiponectin; Important adipokine involved in the control of fat metabolism and insulin sensitivity, with direct anti-diabetic, anti-atherogenic and anti-inflammatory activities. Stimulates AMPK phosphorylation and activation in the liver and the skeletal muscle, enhancing glucose utilization and fatty-acid combustion. Antagonizes TNF-alpha by negatively regulating its expression in various tissue…	https://smart.embl.de/smart/DDvec.cgi?smart=328:C1Q(189|325)+	282865,30 kDa adipocyte complement-related protein,A0A3Q1M564,A5D7A8,ACRP30,ADIPOQ,ADIPOQ-201,ADIPO_BOVIN,APM1,Adipocyte complement-related 30 kDa protein,Adiponectin,Adiponectin isoform X3,Adiponectin, C1Q and collagen domain containing,Adipose most abundant gene transcript 1 protein,ENSBTAG00000052213,ENSBTAP00000065019,ENSBTAT00000077795,NM_174742.2,NP_777167.1,Q3Y5Z3,Q95MQ4,UPI000FC4E136,XM_0…
ADRA1A	9913.ENSBTAP00000067347	Alpha-1A adrenergic receptor; This alpha-adrenergic receptor mediates its action by association with G proteins that activate a phosphatidylinositol- calcium second messenger system. Its effect is mediated by G(q) and G(11) proteins. Nuclear ADRA1A-ADRA1B heterooligomers regulate phenylephrine (PE)-stimulated ERK signaling in cardiac myocytes (By similarity).	https://smart.embl.de/smart/DDvec.cgi?smart=524:Pfam_7tm_1(43|326)+	282134,A0A3Q1M6R1,A0A3Q1MAT2,A0A3Q1MF45,A0A3Q1MMS4,ADA1A_BOVIN,ADRA1A,ADRA1A-201,ADRA1A-202,ADRA1A-203,ADRA1A-204,ADRA1A-205,ADRA1C,Adrenergic receptor alpha-1A,Adrenoceptor alpha 1A,Alpha-1A adrenergic receptor,Alpha-1A adrenoceptor,Alpha-1A adrenoreceptor,Alpha-1C adrenergic receptor,ENSBTAG00000031632,ENSBTAP00000042306,ENSBTAP00000066039,ENSBTAP00000067347,ENSBTAP00000070757,ENSBTAP0000007280…
AGAP2	9913.ENSBTAP00000009418	ArfGAP with GTPase domain, ankyrin repeat and PH domain 2.	https://smart.embl.de/smart/DDvec.cgi?smart=1188:Pfam_Ras(404|564)+PH(673|908)+ArfGap(927|1047)+ANK(1086|1115)+ANK(1119|1148)+	504833,A0A3Q1LKD6,A0A3Q1MCU1,AGAP2,AGAP2-201,AGAP2-202,AGAP2-203,E1BIQ2,E1BIQ2_BOVIN,ENSBTAG00000007156,ENSBTAP00000009417,ENSBTAP00000009418,ENSBTAP00000056985,ENSBTAP00000068195,ENSBTAT00000009417,ENSBTAT00000009418,ENSBTAT00000079292,ENSBTAT00000086886,NM_001192039,NM_001192039.1,NP_001178968,NP_001178968.1,UPI0000EBC784,UPI000572E323,UPI0007609B76,XM_005206524,XM_005206524.4,XM_010805124,XM_0…
AGAP3	9913.ENSBTAP00000033311	ArfGAP with GTPase domain, ankyrin repeat and PH domain 3.	https://smart.embl.de/smart/DDvec.cgi?smart=477:ArfGap(228|348)+ANK(387|416)+ANK(420|452)+	616302,A0A3Q1NE39,AGAP3,AGAP3-201,AGAP3-202,E1BB02,E1BB02_BOVIN,ENSBTAG00000008468,ENSBTAP00000011143,ENSBTAP00000033110,ENSBTAP00000033311,ENSBTAP00000069838,ENSBTAT00000011143,ENSBTAT00000033189,ENSBTAT00000033398,ENSBTAT00000079461,UPI000FC4533F,UPI000FC46707,XP_024847016,bta:616302
ALB	9913.ENSBTAP00000022763	Serum albumin; Serum albumin, the main protein of plasma, has a good binding capacity for water, Ca(2+), Na(+), K(+), fatty acids, hormones, bilirubin and drugs. Its main function is the regulation of the colloidal osmotic pressure of blood. Major zinc transporter in plasma, typically binds about 80% of all plasma zinc (By similarity). Major calcium and magnesium transporter in plasma, binds appr…	https://smart.embl.de/smart/DDvec.cgi?smart=607:SIGNAL(1|18)+ALBUMIN(20|204)+ALBUMIN(211|396)+ALBUMIN(403|594)+	280717,2L7U,3V03,4F5S,4JK4,4OR0,6QS9,6RJV,A0A140T897,A0A3Q1LNN7,A5PJX3,ALB,ALB-201,ALB-202,ALBU_BOVIN,Albumin,BSA,Bos d 6,ENSBTAG00000017121,ENSBTAP00000022763,ENSBTAP00000058446,ENSBTAT00000022763,ENSBTAT00000080685,NM_180992,NM_180992.2,NP_851335,NP_851335.1,O02787,P02769,P04277,Q3SZR2,R-BTA-109582,R-BTA-114608,R-BTA-1430728,R-BTA-159418,R-BTA-174824,R-BTA-194068,R-BTA-2168880,R-BTA-2173782,R-B…
ALMS1	9913.ENSBTAP00000044487	ALMS1 centrosome and basal body associated protein.	https://smart.embl.de/smart/DDvec.cgi?smart=4331:Pfam_ALMS_motif(4195|4327)+	533055,A0A3Q1LW52,A0A3Q1MPQ5,ALMS1,ALMS1-201,ALMS1-202,ALMS1-203,Alstrom syndrome protein 1,Alstrom syndrome protein 1 isoform X2,E1B958,E1B958_BOVIN,ENSBTAG00000011172,ENSBTAP00000014841,ENSBTAP00000033071,ENSBTAP00000033072,ENSBTAP00000044487,ENSBTAP00000061650,ENSBTAP00000071644,ENSBTAT00000014841,ENSBTAT00000033148,ENSBTAT00000033149,ENSBTAT00000047267,ENSBTAT00000072472,ENSBTAT00000084254,R-…
ALS2	9913.ENSBTAP00000053718	Alsin Rho guanine nucleotide exchange factor ALS2.	https://smart.embl.de/smart/DDvec.cgi?smart=1656:Pfam_RCC1_2(93|122)+Pfam_RCC1(170|216)+Pfam_RCC1_2(560|589)+Pfam_RhoGEF(693|881)+PH(900|1006)+MORN(1046|1067)+MORN(1069|1090)+MORN(1097|1118)+MORN(1120|1141)+MORN(1148|1169)+MORN(1172|1193)+MORN(1195|1216)+MORN(1218|1240)+Pfam_VPS9(1551|1655)+	535750,A0A3Q1M3S1,ALS2,ALS2-201,ALS2-202,Alsin isoform X1,Amyotrophic lateral sclerosis 2 protein,ENSBTAG00000007395,ENSBTAP00000009722,ENSBTAP00000048017,ENSBTAP00000053718,ENSBTAP00000064826,ENSBTAT00000009722,ENSBTAT00000054444,ENSBTAT00000060956,ENSBTAT00000083612,F1MDF3,F1MDF3_BOVIN,R-BTA-199991,R-BTA-5653656,R-BTA-8876198,R-BTA-9007101,UPI00005BBC7F,UPI000FC4E274,XM_002685510,XM_002685510.5…
ANGEL2	9913.ENSBTAP00000004825	Protein angel homolog 2; Belongs to the CCR4/nocturin family.	https://smart.embl.de/smart/DDvec.cgi?smart=544:Pfam_Exo_endo_phos(170|533)+	540507,A0A3Q1N631,A6H7I3,AAI46258.1,ANGE2_BOVIN,ANGEL2,ANGEL2-201,ANGEL2-202,Angel homolog 2,BC146257,ENSBTAG00000003702,ENSBTAP00000004825,ENSBTAP00000065850,ENSBTAT00000004825,ENSBTAT00000067585,NM_001099110,NM_001099110.1,NP_001092580,NP_001092580.1,Protein angel,Protein angel homolog 2,UPI00005BE769,UPI00038409CC,XM_005217379,XM_005217379.4,XM_010813574,XM_010813574.2,XM_010813575,XM_01081357…
ANKRD42	9913.ENSBTAP00000033880	Ankyrin repeat domain 42.	https://smart.embl.de/smart/DDvec.cgi?smart=574:ANK(25|54)+ANK(59|88)+ANK(92|121)+ANK(125|154)+ANK(158|187)+ANK(191|220)+ANK(263|293)+ANK(297|326)+	522004,A0A3Q1LHW2,ANKRD42,ANKRD42-201,ANKRD42-202,Ankyrin repeat domain 42,Ankyrin repeat domain-containing protein 42,E1BP31,E1BP31_BOVIN,ENSBTAG00000001391,ENSBTAP00000001828,ENSBTAP00000033880,ENSBTAP00000058443,ENSBTAT00000001828,ENSBTAT00000033977,ENSBTAT00000077719,UPI000FC4C578,UPI000FC4DA66,XM_015461150,XM_015461150.2,XM_024987552,XM_024987552.1,XM_024987553,XM_024987553.1,XM_024987555,XM…
AP5B1	9913.ENSBTAP00000054921	AP-5 complex subunit beta-1; As part of AP-5, a probable fifth adaptor protein complex, it may be involved in endosomal transport.	http://smart.embl.de/smart/DDvec.cgi?smart=877:	509087,AAX46687.1,ABG67026.1,AP-5 complex subunit beta-1,AP5B1,AP5B1-201,AP5B1_BOVIN,Adaptor related protein complex 5 subunit beta 1,Adaptor-related protein complex 5 beta subunit,BT021840,BT026187,Beta5,DAAA02063571,DKFZP761E198,ENSBTAG00000046875,ENSBTAP00000054921,ENSBTAT00000064301,G3MZC5,NM_001014877,NM_001014877.2,NP_001014877,NP_001014877.2,Q0V8N1,Q58CV7,UPI00017C3B21,Uncharacterized prot…
APBB2	9913.ENSBTAP00000039437	Amyloid beta precursor protein binding family B member 2.	https://smart.embl.de/smart/DDvec.cgi?smart=757:WW(290|321)+PTB(413|557)+PTB(584|714)+	514013,A0A3Q1LPM8,A0A3Q1MIA1,A0A3Q1MMW3,A0A3Q1ND63,APBB2,APBB2-201,APBB2-202,APBB2-203,APBB2-204,APBB2-205,ENSBTAG00000027569,ENSBTAP00000039437,ENSBTAP00000058954,ENSBTAP00000069418,ENSBTAP00000070813,ENSBTAP00000074028,ENSBTAT00000039647,ENSBTAT00000066378,ENSBTAT00000073192,ENSBTAT00000074557,ENSBTAT00000077807,F1MDE6,F1MDE6_BOVIN,NM_001076847,NM_001076847.1,NP_001070315,NP_001070315.1,UPI0003…
APC2	9913.ENSBTAP00000035274	APC regulator of WNT signaling pathway 2.	https://smart.embl.de/smart/DDvec.cgi?smart=2317:Pfam_APC_N_CC(70|121)+Pfam_Suppressor_APC(188|269)+ARM(365|420)+ARM(488|539)+ARM(541|582)+ARM(584|626)+ARM(628|673)+ARM(678|718)+Pfam_Arm_APC_u3(761|1022)+Pfam_APC_r(1097|1120)+Pfam_APC_r(1300|1323)+Pfam_SAMP(1371|1392)+Pfam_SAMP(1654|1675)+Pfam_APC_basic(1816|2148)+	526572,A0A3Q1LRP9,APC regulator of WNT signaling pathway 2,APC2,APC2-201,APC2-202,Adenomatosis polyposis coli protein,Adenomatous polyposis coli protein 2 isoform X1,E1BI79,E1BI79_BOVIN,ENSBTAG00000015433,ENSBTAP00000020513,ENSBTAP00000035270,ENSBTAP00000035274,ENSBTAP00000057735,ENSBTAT00000020513,ENSBTAT00000035395,ENSBTAT00000035399,ENSBTAT00000077910,UPI000D53A885,UPI000FC444C5,XM_002689175,X…
APOB	9913.ENSBTAP00000038799	Apolipoprotein B.	https://smart.embl.de/smart/DDvec.cgi?smart=4567:SIGNAL(1|22)+LPD_N(43|595)+DUF1943(629|942)+Pfam_DUF1081(957|1068)+Pfam_ApoB100_C(4496|4552)+	494004,A0A3Q1MFR4,APOB,APOB-201,APOB-202,Apolipoprotein B,Apolipoprotein B-100,E1BNR0,E1BNR0_BOVIN,ENSBTAG00000008505,ENSBTAP00000011213,ENSBTAP00000038799,ENSBTAP00000069376,ENSBTAT00000011213,ENSBTAT00000038995,ENSBTAT00000073971,R-BTA-109582,R-BTA-1430728,R-BTA-162582,R-BTA-174824,R-BTA-196854,R-BTA-2173782,R-BTA-2187338,R-BTA-3000471,R-BTA-3000480,R-BTA-3000497,R-BTA-372790,R-BTA-381426,R-BTA…
APOC3	9913.ENSBTAP00000016453	Apolipoprotein C-III; Component of triglyceride-rich very low density lipoproteins (VLDL) and high density lipoproteins (HDL) in plasma. Plays a multifaceted role in triglyceride homeostasis. Intracellularly, promotes hepatic very low density lipoprotein 1 (VLDL1) assembly and secretion; extracellularly, attenuates hydrolysis and clearance of triglyceride-rich lipoproteins (TRLs). Impairs the lip…	https://smart.embl.de/smart/DDvec.cgi?smart=96:Pfam_Apo-CIII(22|90)+	408009,AAI11662.1,AB126687,APOC3,APOC3-201,APOC3_BOVIN,Apo-CIII,ApoC-III,ApoC3,Apolipoprotein C-III,Apolipoprotein C-III precursor,Apolipoprotein C3,BAD15291.1,BC111661,DAA22364.1,ENSBTAG00000012398,ENSBTAP00000016453,ENSBTAT00000016453,GJ062397,NM_001001175,NM_001001175.2,NP_001001175,NP_001001175.1,P19035,Q2M2T0,Q75T83,R-BTA-1430728,R-BTA-162582,R-BTA-196854,R-BTA-2187338,R-BTA-372790,R-BTA-388…
APPL2	9913.ENSBTAP00000041069	Adaptor protein, phosphotyrosine interaction, PH domain and leucine zipper containing 2.	https://smart.embl.de/smart/DDvec.cgi?smart=662:Pfam_BAR_3(7|249)+PH(278|377)+Pfam_PID(492|611)+	515605,A0A3Q1MJZ3,AAI14673.1,APPL2,APPL2-201,APPL2-202,BC114672,DCC-interacting protein 13-beta,ENSBTAG00000030784,ENSBTAP00000041069,ENSBTAP00000071166,ENSBTAT00000043505,ENSBTAT00000068638,NM_001046206,NM_001046206.1,NP_001039671,NP_001039671.1,Q1RMW4,Q1RMW4_BOVIN,UPI00005BBE59,UPI000FC4D9F2,XM_010805164,XM_010805164.3,XM_010805165,XM_010805165.2,XM_024991717,XM_024991717.1,XP_010803466,XP_0108…
ARHGAP23	9913.ENSBTAP00000056495	Rho GTPase activating protein 23.	https://smart.embl.de/smart/DDvec.cgi?smart=1518:PDZ(79|182)+PH(716|837)+RhoGAP(944|1121)+	523030,A0A3Q1LZQ8,A0A3Q1MJ39,A0A3Q1NLW2,ARHGAP23,ARHGAP23-201,ARHGAP23-202,ARHGAP23-203,ARHGAP23-204,ARHGAP23-205,ARHGAP23-206,ENSBTAG00000016911,ENSBTAP00000022495,ENSBTAP00000040811,ENSBTAP00000040812,ENSBTAP00000056495,ENSBTAP00000056513,ENSBTAP00000062828,ENSBTAP00000071341,ENSBTAP00000073459,ENSBTAT00000022495,ENSBTAT00000043223,ENSBTAT00000043224,ENSBTAT00000064869,ENSBTAT00000065086,ENSBTA…
ARHGEF17	9913.ENSBTAP00000053483	Rho guanine nucleotide exchange factor 17.	https://smart.embl.de/smart/DDvec.cgi?smart=2152:RhoGEF(1070|1253)+	540026,A0A3Q1MRC1,A0A3Q1MT41,ARHGEF17,ARHGEF17-201,ARHGEF17-202,ARHGEF17-203,E1BP14,E1BP14_BOVIN,ENSBTAG00000012505,ENSBTAP00000016596,ENSBTAP00000053483,ENSBTAP00000073364,ENSBTAP00000074280,ENSBTAT00000016596,ENSBTAT00000061460,ENSBTAT00000083088,ENSBTAT00000085430,NM_001282586,NM_001282586.1,NP_001269515,NP_001269515.1,R-BTA-162582,R-BTA-193648,R-BTA-193704,R-BTA-194315,R-BTA-194840,R-BTA-2049…
ASCC3	9913.ENSBTAP00000027294	Activating signal cointegrator 1 complex subunit 3; 3'-5' DNA helicase involved in repair of alkylated DNA. Promotes DNA unwinding to generate single-stranded substrate needed for ALKBH3, enabling ALKBH3 to process alkylated N3-methylcytosine (3mC) within double-stranded regions. Part of the ASC-1 complex that enhances NF-kappa-B, SRF and AP1 transactivation.	https://smart.embl.de/smart/DDvec.cgi?smart=2201:DEXDc(473|685)+HELICc(769|857)+Sec63(978|1287)+AAA(1341|1506)+HELICc(1604|1694)+Sec63(1812|2177)+	3.6.4.12,538416,ASCC3,ASCC3-201,ASCC3-202,ASCC3_BOVIN,Activating signal cointegrator complex subunit 3,DAAA02026160,DAAA02026161,DAAA02026162,DAAA02026163,DAAA02026164,DAAA02026165,DAAA02026166,DAAA02026167,DAAA02026168,DAAA02026169,DAAA02026170,DAAA02026171,DAAA02026172,DAAA02026173,DAAA02026174,DAAA02026175,DAAA02026176,DAAA02026177,DAAA02026178,DAAA02026179,DAAA02026180,DAAA02026181,DAAA020261…
ASPM	9913.ENSBTAP00000010340	Abnormal spindle-like microcephaly-associated protein homolog; Probable role in mitotic spindle regulation and coordination of mitotic processes. May have a preferential role in regulating neurogenesis (By similarity).	https://smart.embl.de/smart/DDvec.cgi?smart=3461:Pfam_ASH(37|134)+CH(1113|1257)+IQ(1266|1288)+IQ(1292|1314)+IQ(1315|1337)+IQ(1347|1369)+IQ(1420|1442)+IQ(1464|1486)+IQ(1487|1509)+IQ(1537|1559)+IQ(1560|1581)+IQ(1582|1604)+IQ(1605|1627)+IQ(1632|1654)+IQ(1655|1677)+IQ(1678|1700)+IQ(1712|1734)+IQ(1735|1757)+IQ(1758|1784)+IQ(1785|1807)+IQ(1808|1830)+IQ(1831|1853)+IQ(1858|1880)+IQ(1881|1903)+IQ(1931|195…	534849,ASPM,ASPM-201,ASPM_BOVIN,Abnormal spindle microtubule assembly,ENSBTAG00000007860,ENSBTAP00000010340,ENSBTAP00000041270,ENSBTAT00000010340,ENSBTAT00000043720,F1MM80,NM_001206506,NM_001206506.1,NP_001193435,NP_001193435.1,P62285,UPI000FC494E9,bta:534849
ATP2B2	9913.ENSBTAP00000001723	Calcium-transporting ATPase; This magnesium-dependent enzyme catalyzes the hydrolysis of ATP coupled with the transport of calcium.	https://smart.embl.de/smart/DDvec.cgi?smart=1199:Cation_ATPase_N(47|123)+TRANS(148|170)+Pfam_E1-E2_ATPase(187|305)+Pfam_E1-E2_ATPase(373|477)+Pfam_Cation_ATPase(542|638)+Pfam_Hydrolase_3(791|865)+TRANS(878|900)+Pfam_Cation_ATPase_C(902|1084)+Pfam_ATP_Ca_trans_C(1126|1189)+	7.2.2.10,A0A3Q1LUI4,ATP2B2,ATP2B2-201,ATP2B2-202,ATPase plasma membrane Ca2+ transporting 2,Calcium-transporting ATPase,ENSBTAG00000001305,ENSBTAP00000000680,ENSBTAP00000001722,ENSBTAP00000001723,ENSBTAP00000001724,ENSBTAP00000064197,ENSBTAT00000000680,ENSBTAT00000001722,ENSBTAT00000001723,ENSBTAT00000001724,ENSBTAT00000080315,F1MN60,F1MN60_BOVIN,NM_001191245,NM_001191245.2,NP_001178174,NP_001178…
ATP8B3	9913.ENSBTAP00000031534	Phospholipid-transporting ATPase; Belongs to the cation transport ATPase (P-type) (TC 3.A.3) family. Type IV subfamily.	https://smart.embl.de/smart/DDvec.cgi?smart=1401:Pfam_PhoLip_ATPase_N(22|99)+Pfam_E1-E2_ATPase(128|368)+Pfam_Cation_ATPase(479|579)+Pfam_PhoLip_ATPase_C(890|1142)+	618059,7.6.2.1,A0A3Q1LLH5,ATP8B3,ATP8B3-201,ATP8B3-202,ATPase phospholipid transporting 8B3,ENSBTAG00000020229,ENSBTAP00000026940,ENSBTAP00000031534,ENSBTAP00000050219,ENSBTAP00000060619,ENSBTAT00000026940,ENSBTAT00000031583,ENSBTAT00000053780,ENSBTAT00000074894,F1MFC4,F1MFC4_BOVIN,NM_001076491,NM_001076491.2,NP_001069959,NP_001069959.2,Phospholipid-transporting ATPase,Phospholipid-transporting A…
AZGP1	9913.ENSBTAP00000037042	Zinc-alpha-2-glycoprotein; Stimulates lipid degradation in adipocytes and causes the extensive fat losses associated with some advanced cancers.	https://smart.embl.de/smart/DDvec.cgi?smart=299:Pfam_MHC_I(23|198)+IGc1(217|287)+	508800,A0A452DK44,AZGP1,AZGP1-201,Alpha-2-glycoprotein 1, zinc-binding,ENSBTAG00000026236,ENSBTAP00000037039,ENSBTAP00000037042,ENSBTAT00000037201,ENSBTAT00000037204,NM_001034331,NM_001034331.1,NP_001029503,NP_001029503.1,Q3ZCH5,R-BTA-382551,R-BTA-5223345,UPI000F7D0C71,ZA2G_BOVIN,Zinc-alpha-2-glycoprotein,Zinc-alpha-2-glycoprotein precursor,Zn-alpha-2-GP,Zn-alpha-2-glycoprotein,bta:508800
B2M	9913.ENSBTAP00000016359	Beta-2-microglobulin; Component of the class I major histocompatibility complex (MHC). Involved in the presentation of peptide antigens to the immune system.	https://smart.embl.de/smart/DDvec.cgi?smart=118:SIGNAL(1|20)+IGc1(40|109)+	1BMG,280729,2XFX,3L9R,3PWV,4F7C,4F7E,4IIQ,4L8S,4L9L,4LCC,783680,AAI18353.1,AAW82090.1,AY911322,B2M,B2M-201,B2MG_BOVIN,BC118352,Beta-2-microglobulin,Beta-2-microglobulin precursor,CAA48828.1,ENSBTAG00000012330,ENSBTAP00000016359,ENSBTAP00000040524,ENSBTAP00000040525,ENSBTAP00000040526,ENSBTAP00000040527,ENSBTAT00000016359,ENSBTAT00000042919,ENSBTAT00000042920,ENSBTAT00000042921,ENSBTAT00000042922,…
BCL2L2	9913.ENSBTAP00000026248	Bcl-2-like protein 2; Promotes cell survival. Blocks dexamethasone-induced apoptosis. Mediates survival of postmitotic Sertoli cells by suppressing death-promoting activity of BAX (By similarity).	https://smart.embl.de/smart/DDvec.cgi?smart=193:BH4(6|32)+BCL(46|144)+TRANS(169|191)+	4K5A,4K5B,767601,AAI14653.1,Apoptosis regulator BCL-W,Apoptosis regulator Bcl-W,B2CL2_BOVIN,BC114652,BCL2 like 2,BCL2L2,BCL2L2-201,Bcl-2-like protein 2,Bcl2-L-2,ENSBTAG00000019692,ENSBTAP00000026248,ENSBTAT00000026248,NM_001076533,NM_001076533.1,NP_001070001,NP_001070001.1,Q1RMX3,UPI0000126832,XM_005211399,XM_005211399.3,XM_005211399.4,XM_015473048.1,XP_005211456,XP_005211456.1,XP_015328534.1,bta…
BNIP1	9913.ENSBTAP00000065854	BCL2 interacting protein 1.	https://smart.embl.de/smart/DDvec.cgi?smart=320:Pfam_Sec20(133|170)+TRANS(209|228)+TRANS(297|319)+	614520,A0A3Q1M736,A0A3Q1M736_BOVIN,A0A3Q1NNQ4,BCL2 interacting protein 1,BNIP1,BNIP1-201,BNIP1-202,BNIP1-203,ENSBTAG00000002021,ENSBTAP00000002619,ENSBTAP00000002620,ENSBTAP00000065854,ENSBTAP00000074538,ENSBTAT00000002619,ENSBTAT00000002620,ENSBTAT00000070768,ENSBTAT00000082058,F1N353,NM_001046539,NM_001046539.4,NP_001040004,NP_001040004.2,Protein transport protein SEC20,R-BTA-199991,R-BTA-56536…
BRPF1	9913.ENSBTAP00000010224	Bromodomain and PHD finger containing 1.	https://smart.embl.de/smart/DDvec.cgi?smart=1219:ZnF_C2H2(21|47)+Pfam_EPL1(106|255)+PHD(275|321)+PHD(385|448)+BROMO(626|740)+PWWP(1088|1171)+	535775,A0A3Q1LGS9,A0A3Q1NAP3,BRPF1,BRPF1-201,BRPF1-202,BRPF1-203,Bromodomain and PHD finger containing 1,Bromodomain and PHD finger-containing protein 1,E1BPS1,E1BPS1_BOVIN,ENSBTAG00000007776,ENSBTAP00000010224,ENSBTAP00000025386,ENSBTAP00000030793,ENSBTAP00000057748,ENSBTAP00000068353,ENSBTAT00000010224,ENSBTAT00000025386,ENSBTAT00000030823,ENSBTAT00000067154,ENSBTAT00000077945,NM_001206089,NM_0…
BRWD1	9913.ENSBTAP00000018087	Bromodomain and WD repeat domain containing 1.	https://smart.embl.de/smart/DDvec.cgi?smart=2323:WD40(175|214)+WD40(217|256)+WD40(259|302)+WD40(311|352)+WD40(357|396)+WD40(418|454)+WD40(457|497)+WD40(504|544)+BROMO(1155|1266)+BROMO(1316|1421)+	540661,BRWD1,BRWD1-201,Bromodomain and WD repeat domain containing 1,ENSBTAG00000013602,ENSBTAP00000018087,ENSBTAP00000031838,ENSBTAP00000031839,ENSBTAT00000018087,ENSBTAT00000031892,ENSBTAT00000031893,F1MTQ0,F1MTQ0_BOVIN,NM_001103174,NM_001103174.1,NM_001103174.2,NP_001096644,NP_001096644.1,R-BTA-1266695,R-BTA-1280215,R-BTA-168256,R-BTA-3247509,R-BTA-449147,R-BTA-4839726,UPI0000EBC1BF,XM_0249913…
BST1	9913.ENSBTAP00000008097	Bone marrow stromal cell antigen 1.	https://smart.embl.de/smart/DDvec.cgi?smart=318:SIGNAL(1|30)+Pfam_Rib_hydrolayse(42|282)+	2.4.99.20,3.2.2.6,616757,ADP-ribosyl cyclase 2,BST1,BST1-201,Bone marrow stromal cell antigen 1,EC 2.4.99.20,EC 3.2.2.6,ENSBTAG00000006156,ENSBTAP00000008097,ENSBTAT00000008097,F1MLP3,F1MLP3_BOVIN,R-BTA-1430728,R-BTA-168249,R-BTA-168256,R-BTA-196807,R-BTA-196849,R-BTA-196854,R-BTA-6798695,UPI0000EBCC54,XM_002688466,XM_002688466.4,XM_002688466.5,XM_024993651,XM_024993651.1,XM_868864.5,XP_002688512…
C1QC	9913.ENSBTAP00000014865	Complement C1q C chain.	https://smart.embl.de/smart/DDvec.cgi?smart=243:SIGNAL(1|24)+Pfam_Collagen(30|92)+C1Q(111|243)+	509968,A0A3B0IZF8,A0A3B0IZF8_BOVIN,ADIB,Adiponectin B,C1QC,C1QC-201,Complement C1q C chain,Complement C1q subcomponent subunit C,Complement C1q subcomponent subunit C precursor,ENSBTAG00000011193,ENSBTAP00000014865,ENSBTAT00000014865,LT963108,NM_001206396,NM_001206396.1,NP_001193325,NP_001193325.1,SOR70326.1,UPI00017C2C6D,bta:509968
C1R	9913.ENSBTAP00000069754	Complement C1r; Belongs to the peptidase S1 family.	https://smart.embl.de/smart/DDvec.cgi?smart=713:CUB(23|149)+EGF_CA(150|198)+CUB(201|313)+CCP(317|379)+CCP(384|455)+Tryp_SPc(471|705)+	3.4.21.41,511581,A0A3Q1MGP1,A0A3Q1MGP1_BOVIN,A5D9E9,ABQ13008.1,BT030568,C1R,C1R-201,C1R-202,C1R-203,Complement C1r,Complement C1r subcomponent precursor,Complement component 1, r subcomponent,EC 3.4.21.41,ENSBTAG00000008612,ENSBTAP00000011362,ENSBTAP00000015014,ENSBTAP00000069754,ENSBTAT00000011362,ENSBTAT00000015014,ENSBTAT00000073935,NM_001034407,NM_001034407.1,NP_001029579,NP_001029579.1,S01.1…
C29H11orf95	9913.ENSBTAP00000054235	Chromosome 29 C11orf95 homolog.	https://smart.embl.de/smart/DDvec.cgi?smart=490:ZnF_C2H2(10|35)+ZnF_C2H2(192|217)+ZnF_C2H2(411|436)+	C29H11orf95,C29H11orf95-201,C29H11orf95-202,Chromosome 29 C11orf95 homolog,ENSBTAG00000019208,ENSBTAP00000025566,ENSBTAP00000054235,ENSBTAT00000025566,ENSBTAT00000064489,F1MKK3,G3MXG8,G3MXG8_BOVIN,UPI000FC47BAF,UPI000FC4CACA,XM_024987566,XM_024987566.1,XM_024987567,XM_024987567.1,XP_024843334,XP_024843334.1,XP_024843335,XP_024843335.1
C4BPA	9913.ENSBTAP00000073110	C4b-binding protein alpha chain; Controls the classical pathway of complement activation. It binds as a cofactor to C3b/C4b inactivator (C3bINA), which then hydrolyzes the complement fragment C4b. It also accelerates the degradation of the C4bC2a complex (C3 convertase) by dissociating the complement fragment C2a. Alpha chain binds C4b. It interacts also with serum amyloid P component.	https://smart.embl.de/smart/DDvec.cgi?smart=610:CCP(50|107)+CCP(112|169)+CCP(174|234)+CCP(239|294)+CCP(299|362)+CCP(367|425)+CCP(429|483)+CCP(487|541)+	281651,A0A3Q1LUK9,AAI05470.1,BC105469,C4BPA,C4BPA-201,C4BPA-202,C4BPA-203,C4BPA-204,C4BPA_BOVIN,C4b-binding protein alpha chain,C4b-binding protein alpha chain precursor,C4bp,CAA83498.1,Complement component 4 binding protein alpha,ENSBTAG00000009876,ENSBTAP00000013024,ENSBTAP00000038794,ENSBTAP00000047025,ENSBTAP00000058920,ENSBTAP00000073110,ENSBTAT00000013024,ENSBTAT00000038990,ENSBTAT000000502…
C5	9913.ENSBTAP00000016204	Complement C5a anaphylatoxin; Derived from proteolytic degradation of complement C5, C5 anaphylatoxin is a mediator of local inflammatory process. Binding to the receptor C5AR1 induces a variety of responses including intracellular calcium release, contraction of smooth muscle, increased vascular permeability, and histamine release from mast cells and basophilic leukocytes. C5a is also a potent c…	https://smart.embl.de/smart/DDvec.cgi?smart=1677:SIGNAL(1|18)+Pfam_A2M_N(125|219)+A2M_N_2(465|612)+ANATO(698|732)+A2M(772|859)+Thiol-ester_cl(996|1025)+Pfam_A2M_comp(1051|1302)+A2M_recep(1417|1507)+C345C(1547|1658)+	512045,C5,C5-201,CO5_BOVIN,Complement C5,Complement C5a anaphylatoxin,Complement C5a anaphylatoxin precursor,Complement component 5,ENSBTAG00000012210,ENSBTAP00000016204,ENSBTAP00000036074,ENSBTAP00000041205,ENSBTAP00000041208,ENSBTAT00000016204,ENSBTAT00000036212,ENSBTAT00000043647,ENSBTAT00000043651,F1MY85,NM_001166616,NM_001166616.1,NP_001160088,NP_001160088.1,P12082,UPI0000EBCEDC,XM_024995617…
C9	9913.ENSBTAP00000021495	Complement component C9; Constituent of the membrane attack complex (MAC) that plays a key role in the innate and adaptive immune response by forming pores in the plasma membrane of target cells. C9 is the pore-forming subunit of the MAC.	https://smart.embl.de/smart/DDvec.cgi?smart=548:SIGNAL(1|21)+TSP1(43|93)+LDLa(98|134)+MACPF(298|508)+EGF(514|545)+	526766,A0A3Q1MU98,AAI05175.1,BC105174,C9,C9-201,C9-202,CO9_BOVIN,Complement C9,Complement component 9,Complement component C9,Complement component C9 precursor,ENSBTAG00000016149,ENSBTAP00000021495,ENSBTAP00000036601,ENSBTAP00000074107,ENSBTAT00000021495,ENSBTAT00000036746,ENSBTAT00000083951,NM_001035364,NM_001035364.2,NP_001030441,NP_001030441.1,Q3MHN2,R-BTA-166658,R-BTA-168249,R-BTA-168256,R-BT…
CACNA1A	9913.ENSBTAP00000019752	Voltage-dependent P/Q-type calcium channel subunit alpha; Voltage-sensitive calcium channels (VSCC) mediate the entry of calcium ions into excitable cells and are also involved in a variety of calcium-dependent processes, including muscle contraction, hormone or neurotransmitter release, gene expression, cell motility, cell division and cell death. The isoform alpha-1A gives rise to P and/or Q- t…	https://smart.embl.de/smart/DDvec.cgi?smart=2498:Pfam_Ion_trans(97|371)+Pfam_PKD_channel(577|720)+Pfam_Ion_trans(1245|1523)+Pfam_Ion_trans(1567|1824)+Pfam_GPHH(1825|1895)+Ca_chan_IQ(1950|1984)+AT_hook(2104|2116)+	282648,A0A3Q1LN55,CACNA1A,CACNA1A-201,CACNA1A-202,Calcium voltage-gated channel subunit alpha1 A,ENSBTAG00000014828,ENSBTAP00000019752,ENSBTAP00000043980,ENSBTAP00000043984,ENSBTAP00000058208,ENSBTAT00000019752,ENSBTAT00000046711,ENSBTAT00000046715,ENSBTAT00000074041,F1N1E0,F1N1E0_BOVIN,NM_001075129,NM_001075129.1,NP_001068597,NP_001068597.1,R-BTA-112308,R-BTA-112315,R-BTA-112316,R-BTA-1430728,R-…
CACNA1B	9913.ENSBTAP00000045932	Voltage-dependent N-type calcium channel subunit alpha; Voltage-sensitive calcium channels (VSCC) mediate the entry of calcium ions into excitable cells and are also involved in a variety of calcium-dependent processes, including muscle contraction, hormone or neurotransmitter release, gene expression, cell motility, cell division and cell death. The isoform alpha-1B gives rise to N-type calcium …	https://smart.embl.de/smart/DDvec.cgi?smart=2331:Pfam_Ion_trans(94|367)+Pfam_Ion_trans(481|720)+Pfam_Ion_trans(1142|1420)+Pfam_PKD_channel(1544|1705)+Pfam_GPHH(1711|1782)+Ca_chan_IQ(1837|1871)+	282410,A0A3Q1MRE0,CACNA1B,CACNA1B-201,CACNA1B-202,Calcium voltage-gated channel subunit alpha1 B,ENSBTAG00000007882,ENSBTAP00000010368,ENSBTAP00000027827,ENSBTAP00000045932,ENSBTAP00000072387,ENSBTAT00000010368,ENSBTAT00000027827,ENSBTAT00000048983,ENSBTAT00000067751,G3X7Z2,G3X7Z2_BOVIN,NM_174632,NM_174632.2,NP_777057,NP_777057.1,R-BTA-112308,R-BTA-112315,R-BTA-112316,UPI000F7D1C22,UPI000FC483F1,…
CACNA1C	9913.ENSBTAP00000014104	Voltage-dependent L-type calcium channel subunit alpha; Voltage-sensitive calcium channels (VSCC) mediate the entry of calcium ions into excitable cells and are also involved in a variety of calcium-dependent processes, including muscle contraction, hormone or neurotransmitter release, gene expression, cell motility, cell division and cell death; Belongs to the calcium channel alpha-1 subunit (TC…	https://smart.embl.de/smart/DDvec.cgi?smart=2048:Pfam_Ion_trans(1|257)+Pfam_PKD_channel(370|616)+Pfam_Ion_trans(757|1035)+Pfam_PKD_channel(1221|1392)+Pfam_GPHH(1398|1468)+Ca_chan_IQ(1520|1554)+Pfam_CAC1F_C(1563|1825)+Pfam_CAC1F_C(1894|2007)+	408015,A0A3Q1LIL2,A0A3Q1LS37,A0A3Q1MDD7,CACNA1C,CACNA1C-201,CACNA1C-202,CACNA1C-203,CACNA1C-204,CACNA1C-205,Calcium voltage-gated channel subunit alpha1 C,ENSBTAG00000010660,ENSBTAP00000014099,ENSBTAP00000014104,ENSBTAP00000014110,ENSBTAP00000014113,ENSBTAP00000037528,ENSBTAP00000037530,ENSBTAP00000056537,ENSBTAP00000058918,ENSBTAP00000063128,ENSBTAP00000068940,ENSBTAT00000014099,ENSBTAT000000141…
CACNA1F	9913.ENSBTAP00000021433	Voltage-dependent L-type calcium channel subunit alpha; Voltage-sensitive calcium channels (VSCC) mediate the entry of calcium ions into excitable cells and are also involved in a variety of calcium-dependent processes, including muscle contraction, hormone or neurotransmitter release, gene expression, cell motility, cell division and cell death; Belongs to the calcium channel alpha-1 subunit (TC…	https://smart.embl.de/smart/DDvec.cgi?smart=1972:Pfam_Ion_trans(91|383)+Pfam_Ion_trans(525|765)+Pfam_Ion_trans(866|1144)+Pfam_PKD_channel(1278|1443)+Pfam_GPHH(1449|1519)+Ca_chan_IQ(1571|1605)+Pfam_CAC1F_C(1615|1971)+	509779,CACNA1F,CACNA1F-201,Calcium voltage-gated channel subunit alpha1 F,E1B9S9,E1B9S9_BOVIN,ENSBTAG00000016097,ENSBTAP00000019751,ENSBTAP00000021433,ENSBTAT00000019751,ENSBTAT00000021433,NM_001205663,NM_001205663.1,NP_001192592,NP_001192592.1,R-BTA-397014,R-BTA-5576891,R-BTA-5576892,R-BTA-5576893,UPI0000EBE9A5,XM_024987854,XM_024987854.1,XP_024843622,XP_024843622.1,bta:509779
CAPN14	9913.ENSBTAP00000021091	Calpain 14; Belongs to the peptidase C2 family.	https://smart.embl.de/smart/DDvec.cgi?smart=685:CysPc(25|344)+calpain_III(347|499)+EFh(561|589)+EFh(591|619)+	3.4.22.-,515741,C02.021,CAPN14,CAPN14-201,Calpain 14,Calpain-14,EC 3.4.22.-,ENSBTAG00000015865,ENSBTAP00000021089,ENSBTAP00000021091,ENSBTAT00000021089,ENSBTAT00000021091,F1MB09,F1MB09_BOVIN,NM_001192425,NM_001192425.1,NP_001179354,NP_001179354.1,R-BTA-1474228,R-BTA-1474244,UPI0001D56768,XM_010810120,XM_010810120.3,XM_010810121,XM_010810121.3,XM_010810122,XM_010810122.3,XP_010808422,XP_010808422.…
CARNS1	9913.ENSBTAP00000023529	Carnosine synthase 1.	https://smart.embl.de/smart/DDvec.cgi?smart=951:Pfam_ATP-grasp_4(669|825)+	6.3.2.11,783525,CARNS1,CARNS1-201,Carnosine synthase,Carnosine synthase 1,Carnosine synthase 1 isoform X1,EC 6.3.2.11,ENSBTAG00000017690,ENSBTAP00000023529,ENSBTAT00000023529,F1MY45,F1MY45_BOVIN,R-BTA-1430728,R-BTA-70921,R-BTA-71291,UPI000D539B46,XM_024987629,XM_024987629.1,XM_024987630,XM_024987630.1,XM_024987631,XM_024987631.1,XM_024987632,XM_024987632.1,XM_024987634,XM_024987634.1,XM_024987635…
CASD1	9913.ENSBTAP00000067453	CAS1 domain containing 1.	https://smart.embl.de/smart/DDvec.cgi?smart=967:Pfam_Cas1_AcylT(438|946)+	2.3.1.45,532541,A0A3Q1MB17,A0A3Q1MB17_BOVIN,A0A3Q1MHF1,A0A3Q1MQQ4,CAS1 domain containing 1,CASD1,CASD1-201,CASD1-202,CASD1-203,CASD1-204,EC 2.3.1.45,ENSBTAG00000009109,ENSBTAP00000012005,ENSBTAP00000012007,ENSBTAP00000067453,ENSBTAP00000070669,ENSBTAP00000074365,ENSBTAT00000012005,ENSBTAT00000012007,ENSBTAT00000070226,ENSBTAT00000072123,ENSBTAT00000074342,F1MBE8,N-acetylneuraminate 9-O-acetyltran…
CAT	9913.ENSBTAP00000074355	Catalase; Occurs in almost all aerobically respiring organisms and serves to protect cells from the toxic effects of hydrogen peroxide. Promotes growth of cells.	https://smart.embl.de/smart/DDvec.cgi?smart=542:Catalase(28|469)+TRANS(508|530)+	1.11.1.6,1TGU,1TH2,1TH3,1TH4,3J7B,3NWL,3RE8,3RGP,3RGS,4BLC,531682,5GKN,6JNT,6JNU,7CAT,8CAT,A0A3Q1LKF1,A0A3Q1MQP3,AAI03067.1,BC103066,CAT,CAT-201,CAT-202,CAT-203,CATA_BOVIN,CHEMBL2227489,Catalase,ENSBTAG00000020980,ENSBTAP00000027941,ENSBTAP00000057110,ENSBTAP00000074355,ENSBTAT00000027941,ENSBTAT00000079521,ENSBTAT00000086989,NM_001035386,NM_001035386.2,NP_001030463,NP_001030463.1,P00432,Q3SZ80,R…
CC2D2A	9913.ENSBTAP00000055063	Coiled-coil and C2 domain containing 2A.	https://smart.embl.de/smart/DDvec.cgi?smart=1620:Pfam_CC2D2AN-C2(646|820)+C2(1043|1203)+	517240,CC2D2A,CC2D2A-201,CC2D2A-202,Coiled-coil and C2 domain containing 2A,Coiled-coil and C2 domain-containing protein 2A,E1B8U8,ENSBTAG00000018638,ENSBTAP00000024802,ENSBTAP00000042224,ENSBTAP00000055063,ENSBTAT00000024802,ENSBTAT00000044758,ENSBTAT00000065167,G3MZR0,G3MZR0_BOVIN,R-BTA-1852241,R-BTA-5617833,R-BTA-5620912,UPI000FC47041,UPI000FC47A5A,XM_024993645,XM_024993645.1,XM_024993646,XM_0…
CCDC114	9913.ENSBTAP00000040922	Coiled-coil domain containing 114.	http://smart.embl.de/smart/DDvec.cgi?smart=687:	CCDC114,CCDC114-201,Coiled-coil domain containing 114,ENSBTAG00000030667,ENSBTAP00000040922,ENSBTAT00000043347,F1N2N9,F1N2N9_BOVIN,UPI000FC4B523,XM_024979212,XM_024979212.1,XM_024979213,XM_024979213.1,XM_024979214,XM_024979214.1,XM_024979215,XM_024979215.1,XM_024979216,XM_024979216.1,XM_024979217,XM_024979217.1,XM_024979218,XM_024979218.1,XM_024979219,XM_024979219.1,XM_024979220,XM_024979220.1,XM…
CCDC14	9913.ENSBTAP00000000740	Coiled-coil domain containing 14.	https://smart.embl.de/smart/DDvec.cgi?smart=941:TRANS(21|43)+Pfam_CCDC14(97|941)+	786080,CCDC14,CCDC14-201,CCDC14-202,Coiled-coil domain containing 14,Coiled-coil domain-containing protein 14,ENSBTAG00000000566,ENSBTAP00000000740,ENSBTAP00000048000,ENSBTAT00000000740,ENSBTAT00000054897,F1MS02,F1MS02_BOVIN,F6RBC6,NM_001101298,NM_001101298.2,NM_001352180,NM_001352180.1,NP_001094768,NP_001094768.1,NP_001339109,NP_001339109.1,UPI0002263B0B,UPI000FC4E038,XM_005201437.3,XM_010801204…
CCDC30-2	9913.ENSBTAP00000065031	WD_REPEATS_REGION domain-containing protein.	https://smart.embl.de/smart/DDvec.cgi?smart=571:Pfam_TFIID_NTD2(57|177)+WD40(239|278)+WD40(313|352)+WD40(355|394)+WD40(397|436)+WD40(439|478)+WD40(481|520)+	100297243,A0A3Q1N504,A0A3Q1N504_BOVIN,CCDC30,CCDC30-2,ENSBTAG00000052771,ENSBTAP00000065031,ENSBTAT00000082836,UPI000FC4F2D7,WD_REPEATS_REGION domain-containing protein,XP_024845970,bta:100297243
CCDC8	9913.ENSBTAP00000024194	Coiled-coil domain containing 8.	https://smart.embl.de/smart/DDvec.cgi?smart=510:Pfam_PNMA(1|109)+	CCDC8,CCDC8-201,Coiled-coil domain containing 8,ENSBTAG00000018181,ENSBTAP00000024194,ENSBTAT00000024194,F6R7X9,F6R7X9_BOVIN,NM_001035485,NM_001035485.2,NP_001030562,NP_001030562.2,R-BTA-392499,R-BTA-597592,R-BTA-8951664,UPI000061807E
CD5L	9913.ENSBTAP00000052573	CD5 molecule like.	https://smart.embl.de/smart/DDvec.cgi?smart=451:SIGNAL(1|18)+SR(24|126)+SR(132|234)+SR(237|338)+SR(343|445)+	528593,A6QNW7,A6QNW7_BOVIN,AAI49039.1,BC149038,CD5 antigen-like precursor,CD5 molecule like,CD5L,CD5L protein,CD5L-201,ENSBTAG00000022514,ENSBTAP00000013933,ENSBTAP00000022564,ENSBTAP00000050831,ENSBTAP00000052573,ENSBTAT00000013933,ENSBTAT00000022564,ENSBTAT00000057190,F1N514,NM_001102119,NM_001102119.1,NP_001095589,NP_001095589.1,UPI0001588610,XM_015461806.1,XP_015317292.1,bta:528593
CDAN1	9913.ENSBTAP00000007561	Codanin 1.	https://smart.embl.de/smart/DDvec.cgi?smart=1230:Pfam_Codanin-1_C(787|902)+	538940,CDAN1,CDAN1-201,Codanin 1,Codanin-1,Codanin-1 isoform X5,ENSBTAG00000005751,ENSBTAP00000007561,ENSBTAP00000042704,ENSBTAP00000055848,ENSBTAT00000007561,ENSBTAT00000045306,ENSBTAT00000064221,F1N1F1,F1N1F1_BOVIN,UPI00005C0313,XM_002690811,XM_002690811.5,XM_002690811.6,XM_005211641,XM_005211641.4,XM_005211642,XM_005211642.4,XM_010809232,XM_010809232.3,XM_015465056.1,XM_024998202,XM_024998202.…
CEP104	9913.ENSBTAP00000056801	Centrosomal protein 104.	http://smart.embl.de/smart/DDvec.cgi?smart=993:	785182,A0A3Q1LFA0,A0A3Q1LFA0_BOVIN,A0A3Q1N7L6,CEP104,CEP104-201,CEP104-202,CEP104-203,Centrosomal protein 104,Centrosomal protein CEP104,Centrosomal protein of 104 kDa isoform X1,E1BND2,ENSBTAG00000020014,ENSBTAP00000026656,ENSBTAP00000033995,ENSBTAP00000056801,ENSBTAP00000066747,ENSBTAT00000026656,ENSBTAT00000034094,ENSBTAT00000082802,ENSBTAT00000083185,UPI0000EBD97A,UPI000FC48851,UPI000FC4B8F3,…
CEP170B	9913.ENSBTAP00000006305	Centrosomal protein 170B.	https://smart.embl.de/smart/DDvec.cgi?smart=1613:FHA(26|77)+Pfam_CEP170_C(853|1553)+	100336437,A0A3Q1LVD9,A0A3Q1MH42,CEP170B,CEP170B-201,CEP170B-202,CEP170B-203,Centrosomal protein 170B,Centrosomal protein CEP170,ENSBTAG00000004802,ENSBTAP00000006305,ENSBTAP00000061361,ENSBTAP00000070540,ENSBTAT00000006305,ENSBTAT00000075948,ENSBTAT00000082875,G3X6H0,G3X6H0_BOVIN,UPI000FC4A21D,UPI000FC4B360,UPI000FC4E1F9,XM_024982205,XM_024982205.1,XM_024982206,XM_024982206.1,XM_024982207,XM_0249…
CGN1	9913.ENSBTAP00000003773	Conglutinin; Calcium-dependent lectin-like protein which binds to a yeast cell wall extract and immune complexes through the complement component (C3bi). It is capable of binding non-reducing terminal N- acetylglucosamine, mannose, and fucose residues.	https://smart.embl.de/smart/DDvec.cgi?smart=371:SIGNAL(1|20)+Pfam_Collagen(42|103)+Pfam_Collagen(154|216)+CLECT(247|370)+	281068,6RYG,6RYJ,6RYM,6RYN,AAA20126.1,AAB60624.1,AAX46697.1,BAA03170.1,BAA04983.2,BC,BT021850,CAA50665.1,CGN1,CGN1-201,CONG_BOVIN,Conglutinin,Conglutinin precursor,D14085,D25302,ENSBTAG00000047317,ENSBTAP00000003773,ENSBTAT00000003773,F1MFY6,L18871,NM_175699,NM_175699.2,NP_783630,NP_783630.2,O97748,P23805,Pulmonary surfactant-associated protein D,Q58CU7,Q9TRF6,U06854,U06855,U06856,U06857,U06858,U…
CIC	9913.ENSBTAP00000054105	Capicua transcriptional repressor.	https://smart.embl.de/smart/DDvec.cgi?smart=2508:Pfam_DUF4819(251|348)+HMG(1105|1175)+	538483,A0A3Q1MSI7,CIC,CIC-201,CIC-202,CIC-203,Capicua transcriptional repressor,E1B8E2,ENSBTAG00000019785,ENSBTAP00000026362,ENSBTAP00000054105,ENSBTAP00000057470,ENSBTAT00000026362,ENSBTAT00000064364,ENSBTAT00000075541,G3MX46,G3MX46_BOVIN,Protein capicua homolog isoform X1,UPI0002264113,UPI0003840C7A,UPI000FC4BE86,XM_005219388,XM_005219388.4,XM_005219389,XM_005219389.4,XM_005219390,XM_005219390.…
CILK1	9913.ENSBTAP00000020711	Intestinal cell kinase.	https://smart.embl.de/smart/DDvec.cgi?smart=628:S_TKc(4|284)+	2.7.11.22,506286,A5PK06,A5PK06_BOVIN,AAI42308.1,BC142307,CILK1,CILK1-201,EC 2.7.11.22,ENSBTAG00000015590,ENSBTAP00000020711,ENSBTAP00000035696,ENSBTAT00000020711,ENSBTAT00000035829,ICK,ICK protein,Iciliogenesis associated kinase 1,Intestinal cell (MAK-like) kinase,Intestinal cell kinase,NM_001098887,NM_001098887.1,NP_001092357,NP_001092357.1,Serine/threonine-protein kinase ICK,UPI0000EBE23D,XM_02…
CKLF	9913.ENSBTAP00000049197	Chemokine like factor.	https://smart.embl.de/smart/DDvec.cgi?smart=149:TRANS(21|40)+TRANS(45|67)+TRANS(74|96)+TRANS(106|128)+	525286,CKLF,CKLF-201,Chemokine like factor,Chemokine-like factor,E1BFF7,E1BFF7_BOVIN,ENSBTAG00000038858,ENSBTAP00000049197,ENSBTAP00000053005,ENSBTAT00000054860,ENSBTAT00000055984,LOC525286,UPI000179D699,XM_024978973,XM_024978973.1,XP_024834741,XP_024834741.1,bta:525286
CLU	9913.ENSBTAP00000007324	Clusterin alpha chain; Functions as extracellular chaperone that prevents aggregation of non native proteins. Prevents stress-induced aggregation of blood plasma proteins. Inhibits formation of amyloid fibrils by APP, APOC2, B2M, CALCA, CSN3, SNCA and aggregation-prone LYZ variants (in vitro). Does not require ATP. Maintains partially unfolded proteins in a state appropriate for subsequent refold…	https://smart.embl.de/smart/DDvec.cgi?smart=439:CLb(17|221)+CLa(222|433)+	280750,A5D983,AAA30554.1,AAI18224.1,AAI49633.1,ABQ12942.1,BC118223,BC149632,BT030502,CLU,CLU-201,CLUS_BOVIN,Clusterin,Clusterin alpha chain,Clusterin beta chain,Clusterin preproprotein,ENSBTAG00000005574,ENSBTAP00000007324,ENSBTAT00000007324,Glycoprotein III,GpIII,J05391,NM_173902,NM_173902.2,NP_776327,NP_776327.1,P17697,Q148K1,R-BTA-109582,R-BTA-114608,R-BTA-166658,R-BTA-168249,R-BTA-168256,R-BT…
COL12A1	9913.ENSBTAP00000026725	Collagen alpha-1(XII) chain.	https://smart.embl.de/smart/DDvec.cgi?smart=3065:SIGNAL(1|23)+FN3(25|103)+VWA(138|317)+FN3(334|413)+VWA(438|617)+FN3(632|710)+FN3(723|801)+FN3(814|892)+FN3(905|984)+FN3(996|1074)+FN3(1087|1166)+VWA(1197|1376)+FN3(1385|1463)+FN3(1474|1554)+FN3(1566|1643)+FN3(1655|1734)+FN3(1755|1834)+FN3(1846|1924)+FN3(1936|2017)+FN3(2027|2106)+FN3(2118|2195)+FN3(2206|2285)+VWA(2323|2503)+TSPN(2522|2714)+Pfam_Coll…	359712,COL12A1,COL12A1-201,Collagen alpha-1(XII) chain,Collagen alpha-1(XII) chain precursor,Collagen type XII alpha,Collagen type XII alpha 1 chain,ENSBTAG00000020056,ENSBTAP00000026725,ENSBTAP00000026727,ENSBTAP00000026730,ENSBTAP00000037938,ENSBTAT00000026725,ENSBTAT00000026727,ENSBTAT00000026730,ENSBTAT00000038122,F1N401,F1N401_BOVIN,NM_001206497,NM_001206497.1,NP_001193426,NP_001193426.1,UPI…
COL18A1	9913.ENSBTAP00000034542	Collagen type XVIII alpha 1 chain.	https://smart.embl.de/smart/DDvec.cgi?smart=1514:Pfam_DUF959(16|202)+TSPN(226|415)+Pfam_Collagen(557|619)+Pfam_Collagen(689|749)+Pfam_Collagen(832|889)+Pfam_Collagen(947|1008)+Pfam_Endostatin(1202|1509)+	508076,A8E654,AAI53848.1,BC153847,COL18A1,COL18A1-201,COL18A1-202,Collagen alpha-1(XVIII) chain precursor,Collagen type XVIII alpha,Collagen type XVIII alpha 1 chain,ENSBTAG00000023907,ENSBTAP00000020434,ENSBTAP00000032787,ENSBTAP00000034542,ENSBTAP00000062335,ENSBTAT00000020434,ENSBTAT00000032859,ENSBTAT00000034655,ENSBTAT00000083892,F1N6W9,F1N6W9_BOVIN,NM_001083388,NM_001083388.2,NP_001076857,N…
COL28A1	9913.ENSBTAP00000062228	Collagen type XXVIII alpha 1 chain.	https://smart.embl.de/smart/DDvec.cgi?smart=1034:SIGNAL(1|23)+VWA(45|223)+Pfam_Collagen(621|667)+VWA(682|868)+KU(979|1032)+	A0A3Q1LYA4,A0A3Q1LYA4_BOVIN,COL28A1,COL28A1-201,COL28A1-202,Collagen type XXVIII alpha 1 chain,E1BPV7,ENSBTAG00000024420,ENSBTAP00000033767,ENSBTAP00000062228,ENSBTAT00000033859,ENSBTAT00000067622,R-BTA-1474244,R-BTA-1474290,R-BTA-1650814,R-BTA-8948216,UPI000FC45967,UPI000FC4FEAA
COL6A1	9913.ENSBTAP00000015668	Collagen type VI alpha 1 chain.	https://smart.embl.de/smart/DDvec.cgi?smart=1027:SIGNAL(1|19)+VWA(35|233)+Pfam_Collagen(253|313)+Pfam_Collagen(346|422)+Pfam_Collagen(506|564)+VWA(613|789)+VWA(826|1007)+	511422,COL6A1,COL6A1-201,Collagen alpha-1(VI) chain precursor,Collagen type VI alpha,Collagen type VI alpha 1 chain,E1BI98,E1BI98_BOVIN,ENSBTAG00000011802,ENSBTAP00000015668,ENSBTAT00000015668,NM_001143865,NM_001143865.1,NP_001137337,NP_001137337.1,R-BTA-1442490,R-BTA-1474228,R-BTA-1474244,R-BTA-1474290,R-BTA-162582,R-BTA-1650814,R-BTA-186797,R-BTA-2022090,R-BTA-216083,R-BTA-3000178,R-BTA-8948216…
COL6A5	9913.ENSBTAP00000060400	Collagen type VI alpha 5 chain.	https://smart.embl.de/smart/DDvec.cgi?smart=2465:SIGNAL(1|18)+VWA(28|200)+VWA(231|411)+VWA(437|614)+VWA(623|799)+VWA(809|989)+VWA(1000|1173)+VWA(1563|1752)+VWA(1769|1957)+VWA(2093|2286)+	A0A3Q1LXW3,A0A3Q1LXW3_BOVIN,A0A3Q1M9S2,A0A3Q1MAV9,A0A3Q1MY36,COL6A5,COL6A5-201,COL6A5-202,COL6A5-203,COL6A5-204,Collagen type VI alpha 5 chain,ENSBTAG00000049122,ENSBTAP00000060400,ENSBTAP00000060846,ENSBTAP00000066935,ENSBTAP00000067767,ENSBTAT00000066997,ENSBTAT00000072186,ENSBTAT00000078699,ENSBTAT00000080845,UPI000FC45E1C,UPI000FC4B9E7,UPI000FC4BE23,UPI000FC4F8DB,XM_024997170,XM_024997170.1,X…
CRYBG1	9913.ENSBTAP00000068722	Crystallin beta-gamma domain containing 1; Belongs to the beta/gamma-crystallin family.	https://smart.embl.de/smart/DDvec.cgi?smart=2118:XTALbg(1419|1513)+XTALbg(1521|1602)+XTALbg(1616|1709)+XTALbg(1717|1800)+XTALbg(1813|1892)+XTALbg(1900|1980)+RICIN(1983|2116)+	526200,A0A3Q1LX44,A0A3Q1MCW7,A0A3Q1MCW7_BOVIN,CRYBG1,CRYBG1-201,CRYBG1-202,CRYBG1-203,Crystallin beta-gamma domain containing 1,E1BH02,ENSBTAG00000017527,ENSBTAP00000023304,ENSBTAP00000065303,ENSBTAP00000068722,ENSBTAT00000023304,ENSBTAT00000068717,ENSBTAT00000072402,UPI000572AFB4,UPI000572C0E9,UPI000FC488A1,XM_003586468,XM_003586468.4,XM_003586468.5,XM_010808463,XM_010808463.3,XM_015464784.1,XP_…
CSMD2	9913.ENSBTAP00000007609	CUB and Sushi multiple domains 2.	https://smart.embl.de/smart/DDvec.cgi?smart=3609:CUB(68|176)+CCP(181|238)+CUB(244|348)+CCP(385|442)+CUB(447|558)+CCP(563|616)+CUB(620|728)+CCP(733|790)+CUB(794|902)+CCP(909|962)+CUB(966|1076)+CCP(1081|1136)+CUB(1140|1248)+CCP(1253|1309)+CUB(1313|1422)+CCP(1427|1483)+CUB(1487|1595)+CCP(1600|1657)+CUB(1661|1769)+CCP(1777|1834)+CUB(1838|1946)+CCP(1951|2006)+CUB(2010|2118)+CCP(2123|2178)+CUB(2182|229…	100139189,A0A3Q1LIU1,A0A3Q1MKR1,A0A3Q1MUS8,A0A3Q1N1W0,A0A3Q1N5A6,CSMD2,CSMD2-201,CSMD2-202,CSMD2-203,CSMD2-204,CSMD2-205,CSMD2-206,CUB and Sushi multiple domains 2,CUB and sushi domain-containing protein,CUB and sushi domain-containing protein 2,ENSBTAG00000005784,ENSBTAP00000007609,ENSBTAP00000059092,ENSBTAP00000063145,ENSBTAP00000065314,ENSBTAP00000069831,ENSBTAP00000074409,ENSBTAT00000007609,E…
CSTA	9913.ENSBTAP00000014138	Cystatin-A; This is an intracellular thiol proteinase inhibitor; Belongs to the cystatin family.	https://smart.embl.de/smart/DDvec.cgi?smart=98:CY(1|98)+	617114,CSTA,CSTA-201,CYTA_BOVIN,Cystatin A,Cystatin-A,Cystatin-A/B,Cystatin-AS,ENSBTAG00000010688,ENSBTAP00000014138,ENSBTAT00000014138,F1N608,NM_001167824,NM_001167824.1,NP_001161296,NP_001161296.1,P80416,STF1,Stefin-A,UPI0000581032,bta:617114
CTC1	9913.ENSBTAP00000042139	CST telomere replication complex component 1.	https://smart.embl.de/smart/DDvec.cgi?smart=1210:Pfam_CTC1(61|1194)+	513500,A0A3Q1MHB6,A0A3Q1MM79,CST complex subunit CTC1,CST complex subunit CTC1 isoform X1,CST telomere replication complex component 1,CTC1,CTC1-201,CTC1-202,CTC1-203,E1BDX1,E1BDX1_BOVIN,ENSBTAG00000007117,ENSBTAP00000009367,ENSBTAP00000009369,ENSBTAP00000042138,ENSBTAP00000042139,ENSBTAP00000070626,ENSBTAP00000072215,ENSBTAT00000009367,ENSBTAT00000009369,ENSBTAT00000044660,ENSBTAT00000044661,ENS…
CUL3	9913.ENSBTAP00000029018	Cullin 3; Belongs to the cullin family.	https://smart.embl.de/smart/DDvec.cgi?smart=768:CULLIN(413|563)+Cullin_Nedd8(695|762)+	534325,A0A3Q1MRG1,CUL3,CUL3-201,CUL3-202,Cullin 3,Cullin-3,E1BIN5,E1BIN5_BOVIN,ENSBTAG00000021769,ENSBTAP00000029018,ENSBTAP00000072419,ENSBTAT00000029018,ENSBTAT00000069789,NM_001192806,NM_001192806.2,NP_001179735,NP_001179735.1,R-BTA-1280215,R-BTA-1280218,R-BTA-162582,R-BTA-168256,R-BTA-195721,R-BTA-201681,R-BTA-392499,R-BTA-4641258,R-BTA-5358351,R-BTA-5632684,R-BTA-5658442,R-BTA-5673001,R-BTA-…
CUX1	9913.ENSBTAP00000070582	Homeobox protein cut-like.	https://smart.embl.de/smart/DDvec.cgi?smart=1648:CUT(668|754)+CUT(1056|1144)+CUT(1239|1325)+HOX(1365|1427)+	523683,A0A3Q1LLJ6,A0A3Q1M148,A0A3Q1M822,A0A3Q1MH77,A0A3Q1MH77_BOVIN,A0A3Q1MYA7,CUX1,CUX1-201,CUX1-202,CUX1-203,CUX1-204,CUX1-205,CUX1-206,Cut like homeobox 1,ENSBTAG00000010659,ENSBTAP00000014094,ENSBTAP00000014098,ENSBTAP00000014105,ENSBTAP00000037085,ENSBTAP00000037088,ENSBTAP00000060651,ENSBTAP00000060997,ENSBTAP00000063694,ENSBTAP00000066571,ENSBTAP00000070582,ENSBTAT00000014094,ENSBTAT000000…
CXADR	9913.ENSBTAP00000057482	Coxsackievirus and adenovirus receptor homolog; Component of the epithelial apical junction complex that may function as a homophilic cell adhesion molecule and is essential for tight junction integrity. Also involved in transepithelial migration of leukocytes through adhesive interactions with JAML a transmembrane protein of the plasma membrane of leukocytes. The interaction between both recepto…	https://smart.embl.de/smart/DDvec.cgi?smart=378:IG(39|151)+IGc2(166|232)+TRANS(249|271)+	281733,A0A3Q1LGE0,A0A3Q1LT83,A0A3Q1MQS2,AAI02846.1,AAK57804.1,AY033651,BC102845,BCAR,CAR,CXADR,CXADR Ig-like cell adhesion molecule,CXADR-201,CXADR-202,CXADR-203,CXADR-204,CXAR_BOVIN,Coxsackie virus and adenovirus receptor,Coxsackievirus and adenovirus receptor,Coxsackievirus and adenovirus receptor homolog,ENSBTAG00000004869,ENSBTAP00000006400,ENSBTAP00000057482,ENSBTAP00000063652,ENSBTAP0000007…
DAP	9913.ENSBTAP00000008327	Death-associated protein 1; Negative regulator of autophagy. Involved in mediating interferon-gamma-induced cell death (By similarity).	https://smart.embl.de/smart/DDvec.cgi?smart=102:Pfam_DAP(12|102)+	616066,AAI03333.1,AAX08640.1,BC103332,BT020623,DAP,DAP-1,DAP-201,DAP1_BOVIN,Death associated protein,Death-associated protein 1,ENSBTAG00000006346,ENSBTAP00000008327,ENSBTAT00000008327,NM_001078058,NM_001078058.2,NP_001071526,NP_001071526.1,Q3SYY4,Q5EAE6,UPI0000581D72,bta:616066
DCP1A	9913.ENSBTAP00000014415	Decapping mRNA 1A.	https://smart.embl.de/smart/DDvec.cgi?smart=579:Pfam_DCP1(8|124)+Pfam_mRNA_decap_C(536|578)+	3.-.-.-,783258,DCP1A,DCP1A-201,Decapping mRNA 1A,EC 3.-.-.-,ENSBTAG00000010863,ENSBTAP00000014415,ENSBTAT00000014415,F1N4I7,F1N4I7_BOVIN,MRNA-decapping enzyme 1A,NM_001102330,NM_001102330.1,NP_001095800,NP_001095800.1,R-BTA-429914,R-BTA-430039,R-BTA-450385,R-BTA-450531,R-BTA-8953854,UPI000950D52E,bta:783258
DENND5B	9913.ENSBTAP00000027075	DENN domain containing 5B.	https://smart.embl.de/smart/DDvec.cgi?smart=1274:uDENN(18|120)+DENN(187|375)+dDENN(498|574)+RUN(866|929)+Pfam_PLAT(938|1043)+RUN(1205|1265)+	516544,DENN domain containing 5B,DENN domain-containing protein 5,DENN domain-containing protein 5B,DENND5B,DENND5B-201,ENSBTAG00000020315,ENSBTAP00000027075,ENSBTAP00000030247,ENSBTAT00000027075,ENSBTAT00000030262,F1MQ87,F1MQ87_BOVIN,NM_001205488,NM_001205488.1,NP_001192417,NP_001192417.1,R-BTA-199991,R-BTA-5653656,R-BTA-8876198,R-BTA-9007101,UPI00017C3189,XM_005206831,XM_005206831.4,XM_01547117…
DGCR8	9913.ENSBTAP00000057457	Microprocessor complex subunit DGCR8; Component of the microprocessor complex that acts as a RNA- and heme-binding protein that is involved in the initial step of microRNA (miRNA) biogenesis. Component of the microprocessor complex that is required to process primary miRNA transcripts (pri-miRNAs) to release precursor miRNA (pre-miRNA) in the nucleus. Within the microprocessor complex, DGCR8 func…	https://smart.embl.de/smart/DDvec.cgi?smart=906:WW(302|334)+DSRM(499|564)+DSRM(607|672)+	540254,A0A3Q1LL19,A6QR44,AAI50110.1,BC150109,DGCR8,DGCR8 microprocessor complex subunit,DGCR8-201,DGCR8-202,DGCR8_BOVIN,DiGeorge syndrome critical region 8 homolog,ENSBTAG00000019869,ENSBTAP00000026474,ENSBTAP00000057457,ENSBTAT00000026474,ENSBTAT00000085166,Microprocessor complex subunit DGCR8,NM_001101204,NM_001101204.1,NP_001094674,NP_001094674.1,UPI0000EBDA25,UPI000FC4A7DD,bta:540254
DHX29	9913.ENSBTAP00000013897	ATP-dependent RNA helicase DHX29; ATP-binding RNA helicase involved in translation initiation. Part of the 43S pre-initiation complex that is required for efficient initiation on mRNAs of higher eukaryotes with structured 5'-UTRs by promoting efficient NTPase-dependent 48S complex formation. Specifically binds to the 40S ribosome near the mRNA entrance. Does not possess a processive helicase acti…	https://smart.embl.de/smart/DDvec.cgi?smart=1366:DEXDc(566|760)+HELICc(877|982)+HA2(1044|1135)+Pfam_OB_NTP_bind(1212|1298)+	3.6.4.13,512470,ATP-dependent RNA helicase DHX29,DEAH box protein 29,DExH-box helicase 29,DHX29,DHX29-201,E1B9N7,E1B9N7_BOVIN,EC 3.6.4.13,ENSBTAG00000010510,ENSBTAP00000013897,ENSBTAP00000052989,ENSBTAT00000013897,ENSBTAT00000057419,NM_001206134,NM_001206134.1,NP_001193063,NP_001193063.1,UPI00005C13A1,bta:512470
DIAPH2	9913.ENSBTAP00000072562	Uncharacterized protein.	https://smart.embl.de/smart/DDvec.cgi?smart=781:Drf_FH3(1|138)+FH2(293|743)+	A0A3Q1LN34,A0A3Q1MNK0,A0A3Q1MRR8,A0A3Q1MRR8_BOVIN,DIAPH2,DIAPH2-201,DIAPH2-202,DIAPH2-203,Diaphanous related formin 2,ENSBTAG00000050709,ENSBTAP00000058346,ENSBTAP00000072562,ENSBTAP00000072832,ENSBTAT00000073414,ENSBTAT00000074645,ENSBTAT00000078318,UPI000FC43EF3,UPI000FC4CB05,UPI000FC4E6EB,Uncharacterized protein,XM_024988377,XM_024988377.1,XP_024844145,XP_024844145.1
DIP2A	9913.ENSBTAP00000074032	Disco interacting protein 2 homolog A.	https://smart.embl.de/smart/DDvec.cgi?smart=1571:DMAP_binding(9|123)+Pfam_AMP-binding(332|599)+Pfam_AMP-binding(626|868)+Pfam_AMP-binding(1044|1529)+	A0A3Q1M866,A0A3Q1MEE5,A0A3Q1NMY7,A0A3Q1NMY7_BOVIN,DIP2A,DIP2A-201,DIP2A-202,DIP2A-203,DIP2A-204,Disco interacting protein 2 homolog A,ENSBTAG00000011495,ENSBTAP00000015279,ENSBTAP00000015281,ENSBTAP00000053376,ENSBTAP00000068870,ENSBTAP00000070077,ENSBTAP00000074032,ENSBTAT00000015279,ENSBTAT00000015281,ENSBTAT00000061028,ENSBTAT00000066782,ENSBTAT00000074762,ENSBTAT00000082905,F1MPW1,UPI00038407…
DKK4	9913.ENSBTAP00000000277	Dickkopf WNT signaling pathway inhibitor 4.	https://smart.embl.de/smart/DDvec.cgi?smart=225:SIGNAL(1|18)+Pfam_Dickkopf_N(40|91)+	509338,DKK4,DKK4-201,Dickkopf,Dickkopf WNT signaling pathway inhibitor 4,Dickkopf-related protein 4,E1BHY5,E1BHY5_BOVIN,ENSBTAG00000000226,ENSBTAP00000000277,ENSBTAT00000000277,R-BTA-162582,R-BTA-195721,R-BTA-201681,R-BTA-3772470,UPI000FC495ED,XM_015460894,XM_015460894.2,XP_015316380,XP_015316380.1,bta:509338
DMXL1	9913.ENSBTAP00000068906	Dmx like 1.	https://smart.embl.de/smart/DDvec.cgi?smart=3083:WD40(100|136)+WD40(158|197)+WD40(220|268)+WD40(467|506)+WD40(958|1000)+WD40(1201|1238)+Pfam_Rav1p_C(1417|1878)+WD40(2793|2828)+WD40(2831|2871)+WD40(2883|2925)+WD40(2931|2970)+WD40(2973|3012)+	534524,A0A3Q1LUE2,A0A3Q1M0X6,A0A3Q1M508,A0A3Q1MFQ1,A0A3Q1MHN4,A0A3Q1NC20,A0A3Q1NC20_BOVIN,DMXL1,DMXL1-201,DMXL1-202,DMXL1-203,DMXL1-204,DMXL1-205,DMXL1-206,DMXL1-207,DMXL1-208,DmX-like protein,DmX-like protein 1 isoform X4,Dmx like 1,E1BL55,ENSBTAG00000006748,ENSBTAP00000008886,ENSBTAP00000031346,ENSBTAP00000056112,ENSBTAP00000060745,ENSBTAP00000063323,ENSBTAP00000067795,ENSBTAP00000068716,ENSBTA…
DNAH11	9913.ENSBTAP00000053699	Dynein axonemal heavy chain 11.	https://smart.embl.de/smart/DDvec.cgi?smart=4501:Pfam_DHC_N1(219|792)+Pfam_DHC_N2(1296|1706)+AAA(1873|2009)+Pfam_AAA_5(2154|2299)+AAA(2487|2632)+Pfam_AAA_8(2803|3070)+Pfam_MT(3082|3426)+Pfam_AAA_9(3451|3669)+Pfam_Dynein_heavy(3803|4499)+	104968411,A0A3Q1LQB1,A0A3Q1LRK9,A0A3Q1LT25,A0A3Q1LUS8,A0A3Q1M194,A0A3Q1MAU0,A0A3Q1MC36,A0A3Q1MZ31,A0A3Q1N5Z7,DNAH11,DNAH11-201,DNAH11-202,DNAH11-203,DNAH11-204,DNAH11-205,DNAH11-206,DNAH11-207,DNAH11-208,DNAH11-209,DNAH11-210,Dynein axonemal heavy chain 11,Dynein heavy chain 11, axonemal,Dynein heavy chain 11, axonemal isoform X1,Dynein heavy chain, axonemal,ENSBTAG00000013078,ENSBTAP00000001219,…
DNAH12	9913.ENSBTAP00000066277	Dynein heavy chain 12, axonemal.	https://smart.embl.de/smart/DDvec.cgi?smart=3962:Pfam_DHC_N2(676|1110)+AAA(1268|1407)+AAA(1549|1688)+AAA(1903|2051)+Pfam_AAA_8(2238|2507)+Pfam_MT(2519|2868)+Pfam_AAA_9(2894|3115)+Pfam_Dynein_heavy(3252|3958)+	100847355,A0A3Q1LU44,A0A3Q1LZ19,A0A3Q1M642,A0A3Q1M7D1,A0A3Q1M7D1_BOVIN,A0A3Q1M880,A0A3Q1MAZ5,A0A3Q1NMM9,DNAH12,Dynein axonemal heavy chain 12,Dynein heavy chain 12, axonemal,Dynein heavy chain 12, axonemal isoform X1,Dynein heavy chain, axonemal,ENSBTAG00000020802,ENSBTAP00000012943,ENSBTAP00000013592,ENSBTAP00000027720,ENSBTAP00000054957,ENSBTAP00000064023,ENSBTAP00000065413,ENSBTAP00000066054,E…
DNAH3	9913.ENSBTAP00000024702	Dynein axonemal heavy chain 3.	https://smart.embl.de/smart/DDvec.cgi?smart=3131:Pfam_DHC_N2(3|102)+Pfam_DHC_N2(99|370)+AAA(499|638)+Pfam_AAA_5(783|926)+AAA(1104|1251)+Pfam_AAA_8(1418|1687)+Pfam_MT(1699|2049)+Pfam_AAA_9(2074|2295)+Pfam_Dynein_heavy(2431|3127)+	A0A3Q1MGW2,A0A3Q1N3K9,DNAH3,DNAH3-201,DNAH3-202,DNAH3-203,Dynein axonemal heavy chain 3,ENSBTAG00000018560,ENSBTAP00000024702,ENSBTAP00000034384,ENSBTAP00000044058,ENSBTAP00000064140,ENSBTAP00000073475,ENSBTAT00000024702,ENSBTAT00000034494,ENSBTAT00000046800,ENSBTAT00000071655,ENSBTAT00000073973,F1MRU4,F1MRU4_BOVIN,UPI000FC4988C,UPI000FC49D11,UPI000FC4ABE8
DNAH8	9913.ENSBTAP00000018689	Dynein axonemal heavy chain 8.	https://smart.embl.de/smart/DDvec.cgi?smart=4730:Pfam_DHC_N1(377|931)+Pfam_DHC_N2(1508|1913)+AAA(2081|2225)+AAA(2362|2515)+AAA(2688|2836)+Pfam_AAA_8(3021|3293)+Pfam_MT(3305|3655)+Pfam_AAA_9(3679|3900)+Pfam_Dynein_heavy(4036|4727)+	525414,A0A3Q1LZL0,DNAH8,DNAH8-201,DNAH8-202,DNAH8-203,Dynein axonemal heavy chain 8,Dynein heavy chain 8, axonemal,Dynein heavy chain, axonemal,E1B9R5,E1B9R5_BOVIN,ENSBTAG00000014063,ENSBTAP00000018689,ENSBTAP00000035976,ENSBTAP00000056280,ENSBTAP00000062773,ENSBTAT00000018689,ENSBTAT00000036113,ENSBTAT00000065917,ENSBTAT00000076944,G3N309,UPI000FC4836F,UPI000FC4AC7C,UPI000FC4F386,XM_024983878,XM…
DNAJB1	9913.ENSBTAP00000036132	DnaJ homolog subfamily B member 1; Interacts with HSP70 and can stimulate its ATPase activity. Stimulates the association between HSC70 and HIP. Negatively regulates heat shock-induced HSF1 transcriptional activity during the attenuation and recovery phase period of the heat shock response. Stimulates ATP hydrolysis and the folding of unfolded proteins mediated by HSPA1A/B (in vitro).	https://smart.embl.de/smart/DDvec.cgi?smart=340:DnaJ(3|60)+Pfam_DnaJ_C(164|323)+	538426,AAI04504.1,BC104503,DNAJB1,DNAJB1-201,DNJB1_BOVIN,DnaJ heat shock protein family (Hsp40) member B1,DnaJ homolog subfamily B member 1,ENSBTAG00000016874,ENSBTAP00000022446,ENSBTAP00000036132,ENSBTAT00000022446,ENSBTAT00000036270,NM_001033763,NM_001033763.1,NP_001028935,NP_001028935.1,Q3MI00,R-BTA-162582,R-BTA-2262752,R-BTA-3371453,R-BTA-3371497,R-BTA-3371556,R-BTA-3371568,R-BTA-3371571,R-BT…
DNAJC13	9913.ENSBTAP00000003865	DnaJ heat shock protein family (Hsp40) member C13.	https://smart.embl.de/smart/DDvec.cgi?smart=2243:Pfam_DUF4339(976|1020)+DnaJ(1300|1358)+	504472,DNAJC13,DNAJC13-201,DnaJ homolog subfamily C member 13,ENSBTAG00000002966,ENSBTAP00000003865,ENSBTAT00000003865,F1MDR7,F1MDR7_BOVIN,NM_001113745,NM_001113745.2,NP_001107217,NP_001107217.1,R-BTA-168249,R-BTA-168256,R-BTA-6798695,UPI000D53A38F,XM_005201940,XM_005201940.4,XP_005201997,XP_005201997.2,bta:504472
DOC2B	9913.ENSBTAP00000035058	Double C2-like domain-containing protein.	https://smart.embl.de/smart/DDvec.cgi?smart=412:C2(142|247)+C2(282|396)+	785428,DOC2B,DOC2B-201,Double C2 domain beta,Double C2-like domain-containing protein,Double C2-like domain-containing protein beta,ENSBTAG00000025140,ENSBTAP00000035058,ENSBTAT00000035180,F1N0W4,F1N0W4_BOVIN,UPI000D532C14,XM_024980699,XM_024980699.1,XP_024836467,XP_024836467.1,bta:785428
DOCK4	9913.ENSBTAP00000074559	Dedicator of cytokinesis 4; Belongs to the DOCK family.	https://smart.embl.de/smart/DDvec.cgi?smart=1973:SH3(9|66)+Pfam_DOCK_N(69|392)+Pfam_DOCK-C2(397|583)+Pfam_DHR-2(1092|1597)+	534227,A0A3Q1M8L1,A0A3Q1MU06,A0A3Q1MZL0,A0A3Q1NNR4,A0A3Q1NNR4_BOVIN,DOCK4,DOCK4-201,DOCK4-202,DOCK4-203,DOCK4-204,DOCK4-205,Dedicator of cytokinesis 4,Dedicator of cytokinesis protein 4,Dedicator of cytokinesis protein 4 isoform X1,E1BMG8,ENSBTAG00000021182,ENSBTAP00000028230,ENSBTAP00000028231,ENSBTAP00000028233,ENSBTAP00000033637,ENSBTAP00000033638,ENSBTAP00000061663,ENSBTAP00000066455,ENSBTAP0…
DPPA2	9913.ENSBTAP00000027264	SAP domain-containing protein.	https://smart.embl.de/smart/DDvec.cgi?smart=315:SAP(89|123)+Pfam_Dppa2_A(128|210)+Pfam_DCR(215|281)+	613891,DPPA2,DPPA2-201,Developmental pluripotency associated 2,Developmental pluripotency-associated protein 2,ENSBTAG00000020460,ENSBTAP00000027264,ENSBTAP00000048801,ENSBTAT00000027264,ENSBTAT00000057339,F1MQI2,F1MQI2_BOVIN,NM_001206470,NM_001206470.1,NP_001193399,NP_001193399.1,SAP domain-containing protein,UPI000577437F,bta:613891
DSPP	9913.ENSBTAP00000054907	Dentin sialophosphoprotein.	https://smart.embl.de/smart/DDvec.cgi?smart=1190:SIGNAL(1|17)+	100337125,DSPP,DSPP-201,Dentin sialophosphoprotein,ENSBTAG00000045714,ENSBTAP00000054907,ENSBTAT00000063098,G3MZB1,G3MZB1_BOVIN,UPI000FC4465D,XM_024993784,XM_024993784.1,XP_024849552,XP_024849552.1,bta:100337125
DST-2	9913.ENSBTAP00000074367	Uncharacterized protein.	https://smart.embl.de/smart/DDvec.cgi?smart=3017:CH(249|346)+SPEC(698|795)+SPEC(798|898)+SPEC(1388|1518)+PLEC(2498|2535)+PLEC(2536|2573)+PLEC(2574|2609)+PLEC(2610|2647)+PLEC(2697|2734)+PLEC(2735|2785)+PLEC(2805|2844)+PLEC(2845|2882)+PLEC(2883|2920)+PLEC(2921|2958)+PLEC(2959|2996)+	535297,A0A3Q1LQ75,A0A3Q1M5I7,A0A3Q1MRG6,A0A3Q1MRG6_BOVIN,DST,DST-2,Dystonin,Dystonin isoform X1,ENSBTAG00000051082,ENSBTAP00000057111,ENSBTAP00000063536,ENSBTAP00000074367,ENSBTAT00000077064,ENSBTAT00000084502,ENSBTAT00000087486,UPI0003840093,UPI000FC487B6,UPI000FC4E468,Uncharacterized protein,XM_024984009,XM_024984009.1,XP_024839751,XP_024839777,XP_024839777.1,bta:535297
DUSP5	9913.ENSBTAP00000027029	Dual specificity protein phosphatase; Belongs to the protein-tyrosine phosphatase family. Non- receptor class dual specificity subfamily.	https://smart.embl.de/smart/DDvec.cgi?smart=457:RHOD(82|211)+DSPc(251|389)+	3.1.3.16,3.1.3.48,507061,DUSP5,DUSP5-201,Dual specificity MAP kinase phosphatase,Dual specificity phosphatase 5,Dual specificity protein phosphatase,Dual specificity protein phosphatase 5,EC 3.1.3.16,EC 3.1.3.48,ENSBTAG00000020283,ENSBTAP00000027029,ENSBTAT00000027029,F1MQM7,F1MQM7_BOVIN,NM_001304282,NM_001304282.1,NP_001291211,NP_001291211.1,R-BTA-112409,R-BTA-1280215,R-BTA-162582,R-BTA-168256,R…
DYNC1H1	9913.ENSBTAP00000070205	Dynein cytoplasmic 1 heavy chain 1.	https://smart.embl.de/smart/DDvec.cgi?smart=4657:Pfam_DHC_N1(241|831)+Pfam_DHC_N2(1318|1720)+Pfam_AAA_6(1868|2098)+AAA(2207|2358)+AAA(2578|2728)+AAA(2940|3106)+Pfam_MT(3210|3547)+Pfam_AAA_9(3571|3791)+Pfam_Dynein_heavy(3933|4655)+	537748,A0A3Q1NEU9,A0A3Q1NEU9_BOVIN,Cytoplasmic dynein 1 heavy chain 1,DYNC1H1,DYNC1H1-201,DYNC1H1-202,Dynein cytoplasmic 1 heavy chain 1,Dynein heavy chain 1, cytosolic,E1BDX8,ENSBTAG00000016598,ENSBTAP00000022085,ENSBTAP00000042130,ENSBTAP00000070205,ENSBTAT00000022085,ENSBTAT00000044652,ENSBTAT00000066561,NM_001206138,NM_001206138.1,NP_001193067,NP_001193067.1,R-BTA-141424,R-BTA-141444,R-BTA-16…
EFNA3	9913.ENSBTAP00000026958	Ephrin RBD domain-containing protein; Belongs to the ephrin family.	https://smart.embl.de/smart/DDvec.cgi?smart=238:SIGNAL(1|22)+Pfam_Ephrin(30|165)+	540776,EFNA3,EFNA3-201,ENSBTAG00000033423,ENSBTAP00000026958,ENSBTAT00000026958,Ephrin A3,Ephrin RBD domain-containing protein,Ephrin-A,Ephrin-A3 precursor,F1N163,F1N163_BOVIN,NM_001105429,NM_001105429.1,NP_001098899,NP_001098899.1,R-BTA-1266738,R-BTA-2682334,R-BTA-3928663,R-BTA-3928665,R-BTA-422475,UPI0000EBC52F,XM_010802927,XM_010802927.3,XP_010801229,XP_010801229.1,bta:540776
ENPEP	9913.ENSBTAP00000010972	Glutamyl aminopeptidase; Regulates central hypertension through its calcium-modulated preference to cleave N-terminal acidic residues from peptides such as angiotensin II; Belongs to the peptidase M1 family.	https://smart.embl.de/smart/DDvec.cgi?smart=956:TRANS(21|43)+Pfam_Peptidase_M1(305|540)+Pfam_ERAP1_C(617|935)+	3.4.11.7,504350,A0A3Q1MRJ2,AMPE_BOVIN,AP-A,Aminopeptidase A,CD249,EAP,EC 3.4.11.7,ENPEP,ENPEP-201,ENPEP-202,ENSBTAG00000008332,ENSBTAP00000010972,ENSBTAP00000056971,ENSBTAT00000010972,ENSBTAT00000083256,F1MEM5,Glutamyl aminopeptidase,NM_001038027,NM_001038027.1,NP_001033116,NP_001033116.1,Q32LQ0,UPI00005BCAC6,UPI000FC44114,bta:504350
ENSBTAP00000058812	9913.ENSBTAP00000058812	Uncharacterized protein.	https://smart.embl.de/smart/DDvec.cgi?smart=320:IGc1(1|61)+IG_like(127|202)+IGc1(233|308)+	A0A3Q1LPG0,A0A3Q1LPG0_BOVIN,ENSBTAG00000050723,ENSBTAP00000058812,ENSBTAT00000078996,UPI000FC4B763,Uncharacterized protein
ENSBTAP00000059753	9913.ENSBTAP00000059753	Uncharacterized protein.	https://smart.embl.de/smart/DDvec.cgi?smart=442:IGc1(120|192)+IG_like(230|302)+IGc1(334|412)+	524810,A0A3Q1LRW4,A0A3Q1LRW4_BOVIN,ENSBTAG00000047700,ENSBTAP00000054179,ENSBTAP00000059753,ENSBTAT00000063930,ENSBTAT00000071761,G3MXB5,IgM precursor,Immunoglobulin heavy chain,NP_001192115,UPI000FC4DFFE,UPI000FC4FAA3,Uncharacterized protein,bta:524810
ENSBTAP00000060305	9913.ENSBTAP00000060305	IGv domain-containing protein.	https://smart.embl.de/smart/DDvec.cgi?smart=159:SIGNAL(1|21)+IGv(38|119)+	A0A3Q1LKV0,A0A3Q1LKV0_BOVIN,ENSBTAG00000052621,ENSBTAP00000060305,ENSBTAT00000076364,IGv domain-containing protein,UPI000FC46690
ENSBTAP00000060774	9913.ENSBTAP00000060774	Ig-like domain-containing protein.	https://smart.embl.de/smart/DDvec.cgi?smart=220:IGv(52|132)+	A0A3Q1LLT0,A0A3Q1LLT0_BOVIN,ENSBTAG00000048423,ENSBTAP00000053986,ENSBTAP00000060774,ENSBTAT00000065465,ENSBTAT00000068082,G3MWT1,Ig-like domain-containing protein,UPI000FC4798E,UPI000FC4D6DA
ENSBTAP00000061517	9913.ENSBTAP00000061517	Ig-like domain-containing protein.	https://smart.embl.de/smart/DDvec.cgi?smart=220:SIGNAL(1|26)+IGv(43|123)+	A0A3Q1M0K3,A0A3Q1M0K3_BOVIN,A0A3Q1MIL5,ENSBTAG00000051010,ENSBTAP00000061517,ENSBTAP00000070574,ENSBTAT00000072088,ENSBTAT00000084927,Ig-like domain-containing protein,UPI000FC477DA,UPI000FC4FC53
ENSBTAP00000062433	9913.ENSBTAP00000062433	DUF4211 domain-containing protein.	https://smart.embl.de/smart/DDvec.cgi?smart=306:Pfam_DUF4211(88|215)+	A0A3Q1N0V0,A0A3Q1N0V0_BOVIN,DUF4211 domain-containing protein,ENSBTAG00000049577,ENSBTAP00000062433,ENSBTAT00000076310,UPI000FC47090
ENSBTAP00000062644	9913.ENSBTAP00000062644	Ig-like domain-containing protein.	https://smart.embl.de/smart/DDvec.cgi?smart=186:SIGNAL(1|19)+IGv(36|111)+	A0A3Q1M3A8,A0A3Q1M3A8_BOVIN,ENSBTAG00000054090,ENSBTAP00000062644,ENSBTAT00000069942,Ig-like domain-containing protein,UPI000FC4BFE4
ENSBTAP00000064659	9913.ENSBTAP00000064659	Ig-like domain-containing protein.	https://smart.embl.de/smart/DDvec.cgi?smart=130:SIGNAL(1|16)+IGv(38|113)+	A0A3Q1LVJ5,A0A3Q1LVJ5_BOVIN,ENSBTAG00000050165,ENSBTAP00000064659,ENSBTAT00000074220,Ig-like domain-containing protein,UPI000FC45D27
ENSBTAP00000065308	9913.ENSBTAP00000065308	Uncharacterized protein.	https://smart.embl.de/smart/DDvec.cgi?smart=1522:Pfam_MyTH4(112|219)+SH3(964|1021)+Pfam_MyTH4(1126|1229)+B41(1232|1437)+	A0A3Q1M5U4,A0A3Q1M5U4_BOVIN,ENSBTAG00000011713,ENSBTAP00000015553,ENSBTAP00000015554,ENSBTAP00000065308,ENSBTAT00000015553,ENSBTAT00000015554,ENSBTAT00000075928,F6RQ97,UPI000FC4748A,UPI000FC47BBE,Uncharacterized protein,XR_003031002,XR_003031002.1
ENSBTAP00000065380	9913.ENSBTAP00000065380	Uncharacterized protein.	https://smart.embl.de/smart/DDvec.cgi?smart=433:SR(196|296)+SR(314|414)+	A0A3Q1MA45,A0A3Q1MA45_BOVIN,ENSBTAG00000050618,ENSBTAP00000065380,ENSBTAT00000083715,UPI000FC47049,Uncharacterized protein
ENSBTAP00000065677	9913.ENSBTAP00000065677	RING-type domain-containing protein.	https://smart.embl.de/smart/DDvec.cgi?smart=2037:RING(896|934)+	A0A3Q1LY31,A0A3Q1LY31_BOVIN,ENSBTAG00000053071,ENSBTAP00000065677,ENSBTAT00000067557,RING-type domain-containing protein,UPI000FC47287
ENSBTAP00000066744	9913.ENSBTAP00000066744	Uncharacterized protein.	https://smart.embl.de/smart/DDvec.cgi?smart=422:Pfam_FAM47(14|222)+	100300042,A0A3Q1M8H1,A0A3Q1M8H1_BOVIN,ENSBTAG00000046589,ENSBTAP00000066744,ENSBTAT00000064330,Protein FAM47E,UPI000FC478F6,Uncharacterized protein,XP_002700278,bta:100300042
ENSBTAP00000068198	9913.ENSBTAP00000068198	Uncharacterized protein.	https://smart.embl.de/smart/DDvec.cgi?smart=264:SIGNAL(1|19)+Pfam_IL6Ra-bind(120|210)+	100336476,A0A3Q1MBR6,A0A3Q1MBR6_BOVIN,ENSBTAG00000053696,ENSBTAP00000068198,ENSBTAT00000084862,UPI000FC4C360,Uncharacterized protein,XP_024846054,bta:100336476
ENSBTAP00000069968	9913.ENSBTAP00000069968	Ig-like domain-containing protein.	https://smart.embl.de/smart/DDvec.cgi?smart=219:IGv(39|119)+	A0A3Q1ML26,A0A3Q1ML26_BOVIN,ENSBTAG00000054702,ENSBTAP00000069968,ENSBTAT00000085031,Ig-like domain-containing protein,UPI000FC4B70D
ENSBTAP00000071213	9913.ENSBTAP00000071213	Ig-like domain-containing protein.	https://smart.embl.de/smart/DDvec.cgi?smart=185:SIGNAL(1|20)+IGv(36|108)+	A0A3Q1MK50,A0A3Q1MK50_BOVIN,ENSBTAG00000054009,ENSBTAP00000071213,ENSBTAT00000079976,Ig-like domain-containing protein,UPI000FC4688C
ENSBTAP00000071723	9913.ENSBTAP00000071723	Uncharacterized protein.	https://smart.embl.de/smart/DDvec.cgi?smart=622:IGc2(18|87)+IG(110|194)+Pfam_Titin_Z(382|449)+Pfam_Titin_Z(459|500)+Pfam_Titin_Z(505|544)+Pfam_Titin_Z(549|590)+	A0A3Q1NI96,A0A3Q1NI96_BOVIN,ENSBTAG00000053626,ENSBTAP00000071723,ENSBTAT00000072583,UPI000FC487B1,Uncharacterized protein
ENSBTAP00000072499	9913.ENSBTAP00000072499	Uncharacterized protein.	http://smart.embl.de/smart/DDvec.cgi?smart=160:	A0A3Q1MRL6,A0A3Q1MRL6_BOVIN,ENSBTAG00000048931,ENSBTAP00000072499,ENSBTAT00000080346,UPI000FC49B25,Uncharacterized protein
ENSBTAP00000072865	9913.ENSBTAP00000072865	Uncharacterized protein.	http://smart.embl.de/smart/DDvec.cgi?smart=83:	A0A3Q1MFA3,A0A3Q1MFA3_BOVIN,ENSBTAG00000049635,ENSBTAP00000072865,ENSBTAT00000073436,UPI000FC4EE21,Uncharacterized protein
EP400	9913.ENSBTAP00000027216	E1A binding protein p400.	https://smart.embl.de/smart/DDvec.cgi?smart=3092:Pfam_EP400_N(1|450)+HSA(757|828)+DEXDc(1044|1233)+Pfam_Helicase_C(1854|1970)+SANT(2315|2382)+	3.6.4.-,538310,E1A binding protein p400,E1A-binding protein p400,EC 3.6.4.-,ENSBTAG00000020423,ENSBTAP00000019813,ENSBTAP00000027216,ENSBTAP00000027218,ENSBTAP00000027220,ENSBTAP00000029702,ENSBTAT00000019813,ENSBTAT00000027216,ENSBTAT00000027218,ENSBTAT00000027220,ENSBTAT00000029704,EP400,EP400-201,F1MLB1,F1MLB1_BOVIN,NM_001206859,NM_001206859.1,NP_001193788,NP_001193788.1,R-BTA-2262752,R-BTA-25…
EPB41L1	9913.ENSBTAP00000002151	Erythrocyte membrane protein band 4.1 like 1.	https://smart.embl.de/smart/DDvec.cgi?smart=915:B41(93|288)+FERM_C(292|382)+FA(384|430)+Pfam_SAB(493|544)+Pfam_4_1_CTD(808|902)+	515919,A0A3Q1LQH5,A0A3Q1MBG2,A0A3Q1MGI4,A0A3Q1MLF9,Band 4.1-like protein 1 isoform X7,ENSBTAG00000001640,ENSBTAP00000002151,ENSBTAP00000002153,ENSBTAP00000002155,ENSBTAP00000008758,ENSBTAP00000039064,ENSBTAP00000039065,ENSBTAP00000039066,ENSBTAP00000039067,ENSBTAP00000039068,ENSBTAP00000059240,ENSBTAP00000065035,ENSBTAP00000070295,ENSBTAP00000071424,ENSBTAP00000072528,ENSBTAT00000002151,ENSBTAT00…
EPHA1	9913.ENSBTAP00000071119	EPH receptor A1.	https://smart.embl.de/smart/DDvec.cgi?smart=1014:SIGNAL(1|27)+EPH_lbd(29|206)+Ephrin_rec_like(269|314)+FN3(336|432)+FN3(450|528)+Pfam_EphA2_TM(551|659)+TyrKc(662|918)+SAM(948|1014)+	2.7.10.1,525946,A0A3Q1MJW2,A0A3Q1MJW2_BOVIN,EC 2.7.10.1,ENSBTAG00000006359,ENSBTAP00000008354,ENSBTAP00000033398,ENSBTAP00000071119,ENSBTAT00000008354,ENSBTAT00000033485,ENSBTAT00000075696,EPH receptor A1,EPHA1,EPHA1-201,EPHA1-202,Eph receptor A1,Ephrin type-A receptor 1 precursor,F1MFH7,NM_001144095,NM_001144095.1,NP_001137567,NP_001137567.1,R-BTA-1266738,R-BTA-2682334,R-BTA-3928663,R-BTA-392866…
EPHA2	9913.ENSBTAP00000001080	EPH receptor A2.	https://smart.embl.de/smart/DDvec.cgi?smart=975:SIGNAL(1|23)+EPH_lbd(28|201)+FN3(329|419)+FN3(436|516)+Pfam_EphA2_TM(537|610)+TyrKc(613|870)+SAM(900|967)+	2.7.10.1,512798,A0A3Q1LPW3,E1BJ31,E1BJ31_BOVIN,EC 2.7.10.1,ENSBTAG00000000815,ENSBTAP00000001080,ENSBTAP00000037618,ENSBTAP00000037619,ENSBTAP00000037620,ENSBTAP00000037622,ENSBTAP00000037624,ENSBTAP00000037626,ENSBTAP00000037630,ENSBTAP00000058986,ENSBTAT00000001080,ENSBTAT00000037796,ENSBTAT00000037797,ENSBTAT00000037798,ENSBTAT00000037800,ENSBTAT00000037802,ENSBTAT00000037804,ENSBTAT0000003780…
EPPK1	9913.ENSBTAP00000058073	Epiplakin 1.	https://smart.embl.de/smart/DDvec.cgi?smart=3449:PLEC(22|70)+PLEC(71|108)+PLEC(109|146)+PLEC(147|184)+PLEC(189|224)+PLEC(277|314)+PLEC(315|352)+PLEC(353|390)+PLEC(391|428)+PLEC(429|462)+PLEC(603|640)+PLEC(641|678)+PLEC(679|716)+PLEC(717|754)+PLEC(758|792)+PLEC(923|960)+PLEC(961|998)+PLEC(999|1036)+PLEC(1037|1074)+PLEC(1238|1275)+PLEC(1276|1313)+PLEC(1314|1351)+PLEC(1352|1389)+PLEC(1390|1427)+PLEC…	100337278,A0A3Q1LMV9,A0A3Q1LMV9_BOVIN,ENSBTAG00000045727,ENSBTAP00000058073,ENSBTAT00000065585,EPPK1,EPPK1-201,Epiplakin 1,LOW QUALITY PROTEIN: epiplakin,UPI000FC4D92D,XM_003586872,XM_003586872.5,XP_003586920,XP_003586920.3,bta:100337278
ERC1	9913.ENSBTAP00000071004	ELKS/RAB6-interacting/CAST family member 1.	https://smart.embl.de/smart/DDvec.cgi?smart=1120:Pfam_Cast(453|986)+Pfam_RBD-FIP(1072|1112)+	519271,A0A3Q1LTK7,A0A3Q1LTK7_BOVIN,A0A3Q1LTQ2,A0A3Q1M3R8,A0A3Q1NKD1,E1BPW2,ELKS/RAB6-interacting/CAST family member 1,ELKS/Rab6-interacting/CAST family member 1,ENSBTAG00000013658,ENSBTAP00000018155,ENSBTAP00000018156,ENSBTAP00000018157,ENSBTAP00000053339,ENSBTAP00000058466,ENSBTAP00000060727,ENSBTAP00000068177,ENSBTAP00000071004,ENSBTAP00000072787,ENSBTAT00000018155,ENSBTAT00000018156,ENSBTAT000…
F10	9913.ENSBTAP00000021789	Activated factor Xa heavy chain; Factor Xa is a vitamin K-dependent glycoprotein that converts prothrombin to thrombin in the presence of factor Va, calcium and phospholipid during blood clotting; Belongs to the peptidase S1 family.	https://smart.embl.de/smart/DDvec.cgi?smart=608:GLA(138|201)+EGF_CA(202|238)+EGF(244|281)+Tryp_SPc(349|577)+	1APO,1CCF,1IOD,1KIG,1WHE,1WHF,280787,3.4.21.6,A0A452DIP8,Activated factor Xa heavy chain,Coagulation factor X,Coagulation factor X precursor,EC 3.4.21.6,ENSBTAG00000016385,ENSBTAP00000021789,ENSBTAT00000021789,F10,F10-201,FA10_BOVIN,Factor X heavy chain,Factor X light chain,NM_001080213,NM_001080213.1,NP_001073682,NP_001073682.1,P00743,R-BTA-109582,R-BTA-140834,R-BTA-140837,R-BTA-140875,R-BTA-140…
F13B	9913.ENSBTAP00000020163	Coagulation factor XIII, B polypeptide.	https://smart.embl.de/smart/DDvec.cgi?smart=661:SIGNAL(1|20)+CCP(25|87)+CCP(91|146)+CCP(153|208)+CCP(213|267)+CCP(274|327)+CCP(336|389)+CCP(396|450)+CCP(524|578)+	511483,A0A3Q1LSR2,A0A3Q1MWQ1,AAI09840.1,BC109839,Coagulation factor XIII B chain,Coagulation factor XIII B chain precursor,Coagulation factor XIII B polypeptide,Coagulation factor XIII, B polypeptide,ENSBTAG00000000070,ENSBTAP00000000078,ENSBTAP00000020163,ENSBTAP00000034329,ENSBTAP00000038697,ENSBTAP00000058124,ENSBTAP00000059973,ENSBTAT00000000078,ENSBTAT00000020163,ENSBTAT00000034436,ENSBTAT00…
F1MLW7_BOVIN	9913.ENSBTAP00000031165	Ig-like domain-containing protein.	https://smart.embl.de/smart/DDvec.cgi?smart=139:IGc1(56|130)+	100297192,ENSBTAG00000050062,ENSBTAP00000031165,ENSBTAT00000031209,F1MCF8,F1MLW7,F1MLW7_BOVIN,Ig-like domain-containing protein,NP_001306813,UPI000FC4E4E3,Uncharacterized protein LOC100297192 precursor,bta:100297192
FAM227A-2	9913.ENSBTAP00000061256	Uncharacterized protein.	http://smart.embl.de/smart/DDvec.cgi?smart=224:	100297485,A0A3Q1LZU9,A0A3Q1LZU9_BOVIN,ENSBTAG00000048693,ENSBTAP00000061256,ENSBTAT00000068588,FAM227A,FAM227A-2,Protein FAM227A isoform X4,UPI000FC4F346,Uncharacterized protein,XP_002687980,bta:100297485
FAT4	9913.ENSBTAP00000013316	FAT atypical cadherin 4.	https://smart.embl.de/smart/DDvec.cgi?smart=4982:SIGNAL(1|42)+CA(61|133)+CA(157|248)+CA(272|351)+CA(380|473)+CA(497|580)+CA(605|687)+CA(711|791)+CA(815|891)+CA(915|994)+CA(1018|1098)+CA(1122|1208)+CA(1232|1313)+CA(1337|1418)+CA(1442|1527)+CA(1550|1629)+CA(1651|1738)+CA(1762|1839)+CA(1863|1942)+CA(1966|2049)+CA(2072|2152)+CA(2176|2257)+CA(2282|2362)+CA(2386|2466)+CA(2490|2568)+CA(2588|2669)+CA(269…	781683,E1B949,E1B949_BOVIN,ENSBTAG00000003345,ENSBTAP00000004344,ENSBTAP00000013307,ENSBTAP00000013316,ENSBTAT00000004344,ENSBTAT00000013307,ENSBTAT00000013316,FAT atypical cadherin 4,FAT4,FAT4-201,Protocadherin Fat 4,Protocadherin Fat 4 isoform X1,UPI0000F34A4E,XM_005192648.3,XM_005217605,XM_005217605.2,XM_005217605.3,XM_010813782,XM_010813782.3,XP_005192705.1,XP_005217662,XP_005217662.1,XP_0108…
FBN1	9913.ENSBTAP00000064428	Fibrillin-1; [Fibrillin-1]: Structural component of the 10-12 nm diameter microfibrils of the extracellular matrix, which conveys both structural and regulatory properties to load-bearing connective tissues. Fibrillin-1-containing microfibrils provide long-term force bearing structural support. In tissues such as the lung, blood vessels and skin, microfibrils form the periphery of the elastic fib…	https://smart.embl.de/smart/DDvec.cgi?smart=2990:EGF(278|306)+EGF(309|338)+Pfam_TB(354|397)+EGF_CA(406|447)+EGF_CA(448|489)+Pfam_TB(504|552)+EGF(612|649)+EGF_CA(650|689)+EGF_CA(690|731)+EGF_CA(732|772)+EGF_CA(773|813)+Pfam_TB(829|874)+EGF_CA(883|924)+EGF_CA(925|966)+EGF_CA(967|1006)+Pfam_TB(1021|1056)+EGF_CA(1070|1111)+Pfam_TB(1126|1171)+EGF_CA(1188|1229)+EGF_CA(1230|1272)+EGF_CA(1273|1314)+EGF_C…	281154,A0A3Q1M3V3,A0A3Q1M7S1,AAA74122.1,Asprosin,DAAA02029120,DAAA02029121,DAAA02029122,ENSBTAG00000002278,ENSBTAP00000002944,ENSBTAP00000035493,ENSBTAP00000064428,ENSBTAP00000064456,ENSBTAT00000002944,ENSBTAT00000035622,ENSBTAT00000071835,ENSBTAT00000077684,F1N4K8,FBN1,FBN1-201,FBN1-202,FBN1-203,FBN1_BOVIN,Fibrillin 1,Fibrillin-1,Fibrillin-1 precursor,L28748,MP340,NM_174053,NM_174053.2,NP_776478…
FBN2	9913.ENSBTAP00000020360	Fibrillin 2.	https://smart.embl.de/smart/DDvec.cgi?smart=2912:SIGNAL(1|27)+EGF(148|176)+EGF(179|208)+Pfam_TB(224|267)+EGF_CA(276|317)+EGF_CA(318|359)+Pfam_TB(374|420)+EGF(497|534)+EGF_CA(535|574)+EGF_CA(575|616)+EGF_CA(617|657)+EGF_CA(658|698)+Pfam_TB(714|759)+EGF_CA(768|809)+EGF_CA(810|851)+EGF_CA(852|891)+Pfam_TB(906|944)+EGF_CA(955|996)+Pfam_TB(1011|1055)+EGF_CA(1073|1114)+EGF_CA(1115|1157)+EGF_CA(1158|119…	540017,ENSBTAG00000015307,ENSBTAP00000020360,ENSBTAP00000035484,ENSBTAP00000035488,ENSBTAP00000035489,ENSBTAP00000035493,ENSBTAP00000053223,ENSBTAP00000055730,ENSBTAT00000020360,ENSBTAT00000035613,ENSBTAT00000035617,ENSBTAT00000035618,ENSBTAT00000035622,ENSBTAT00000061630,ENSBTAT00000062999,F1MTZ4,F1MTZ4_BOVIN,FBN2,FBN2-201,Fibrillin 2,Fibrillin 2/3,Fibrillin-2 precursor,NM_001278588,NM_001278588…
FBN3	9913.ENSBTAP00000057208	Fibrillin 3.	https://smart.embl.de/smart/DDvec.cgi?smart=2801:EGF(116|144)+EGF(147|176)+Pfam_TB(192|235)+EGF_CA(244|285)+EGF_CA(286|327)+Pfam_TB(342|388)+EGF(451|488)+EGF_CA(489|528)+EGF_CA(529|570)+EGF_CA(571|611)+EGF_CA(612|652)+Pfam_TB(668|713)+EGF_CA(722|763)+EGF_CA(764|805)+EGF_CA(806|845)+Pfam_TB(860|895)+Pfam_TB(945|989)+EGF_CA(1006|1047)+EGF_CA(1048|1090)+EGF_CA(1112|1153)+EGF_CA(1154|1194)+EGF_CA(119…	A0A3Q1LKJ4,A0A3Q1LKJ4_BOVIN,A0A3Q1M4J7,A0A3Q1M569,A0A3Q1M8R5,A0A3Q1M9L6,A0A3Q1N6T9,ENSBTAG00000000595,ENSBTAP00000000785,ENSBTAP00000010629,ENSBTAP00000035484,ENSBTAP00000035488,ENSBTAP00000035489,ENSBTAP00000057208,ENSBTAP00000063185,ENSBTAP00000065030,ENSBTAP00000066275,ENSBTAP00000066852,ENSBTAP00000066865,ENSBTAT00000000785,ENSBTAT00000010629,ENSBTAT00000035613,ENSBTAT00000035617,ENSBTAT00000…
FBXL19	9913.ENSBTAP00000062981	F-box and leucine rich repeat protein 19.	https://smart.embl.de/smart/DDvec.cgi?smart=1020:Pfam_zf-CXXC(229|275)+PHD(285|347)+FBOX(622|662)+	540981,A0A3Q1N1E4,A0A3Q1N1L9,A0A3Q1N1L9_BOVIN,ENSBTAG00000040555,ENSBTAP00000048930,ENSBTAP00000062854,ENSBTAP00000062981,ENSBTAT00000056997,ENSBTAT00000070563,ENSBTAT00000073772,F-box and leucine rich repeat protein 19,F-box and leucine-rich repeat protein 19,F-box/LRR-repeat protein 19 isoform X2,F1MTB5,FBXL19,FBXL19-201,FBXL19-202,FBXL19-203,R-BTA-1280218,R-BTA-168256,R-BTA-392499,R-BTA-597592…
FETUB	9913.ENSBTAP00000023309	Fetuin-B; Protease inhibitor required for egg fertilization. Required to prevent premature zona pellucida hardening before fertilization, probably by inhibiting the protease activity of ASTL, a protease that mediates the cleavage of ZP2 and triggers zona pellucida hardening (By similarity).	https://smart.embl.de/smart/DDvec.cgi?smart=387:SIGNAL(1|18)+CY(26|139)+CY(151|258)+	504615,AAI03070.1,AAX46582.1,BC103069,BT021735,ENSBTAG00000017531,ENSBTAP00000023309,ENSBTAP00000043443,ENSBTAT00000023309,ENSBTAT00000046118,FETUB,FETUB-201,FETUB_BOVIN,Fetuin B,Fetuin-B,Fetuin-B precursor,I25.061,NM_001034218,NM_001034218.2,NP_001029390,NP_001029390.1,Q58D62,UPI00004ED387,bta:504615
FGA	9913.ENSBTAP00000002145	Fibrinogen alpha chain; Cleaved by the protease thrombin to yield monomers which, together with fibrinogen beta (FGB) and fibrinogen gamma (FGG), polymerize to form an insoluble fibrin matrix. Fibrin has a major function in hemostasis as one of the primary components of blood clots. In addition, functions during the early stages of wound repair to stabilize the lesion and guide cell migration dur…	https://smart.embl.de/smart/DDvec.cgi?smart=863:Fib_alpha(77|221)+Pfam_Fibrinogen_aC(465|531)+FBG(624|860)+	1DEQ,1JY2,1JY3,2BAF,2JOR,522039,A0A3Q1LVV7,ENSBTAG00000001638,ENSBTAP00000002145,ENSBTAP00000061562,ENSBTAT00000002145,ENSBTAT00000070854,F6QND5,FGA,FGA-201,FGA-202,FIBA_BOVIN,Fibrinogen alpha chain,Fibrinogen alpha chain precursor,Fibrinopeptide A,NM_001033626,NM_001033626.1,NP_001028798,NP_001028798.1,O97642,P02672,Q3T049,UPI000383D661,UPI000FC4AE2B,XM_005217437,XM_005217437.4,XP_005217494,XP_0…
FGB	9913.ENSBTAP00000067912	Fibrinogen beta chain; Cleaved by the protease thrombin to yield monomers which, together with fibrinogen alpha (FGA) and fibrinogen gamma (FGG), polymerize to form an insoluble fibrin matrix. Fibrin has a major function in hemostasis as one of the primary components of blood clots. In addition, functions during the early stages of wound repair to stabilize the lesion and guide cell migration dur…	https://smart.embl.de/smart/DDvec.cgi?smart=504:SIGNAL(1|36)+Fib_alpha(103|248)+FBG(249|500)+	1DEQ,1JY2,1JY3,2Z4E,3H32,510522,A0A3Q1MG04,ENSBTAG00000022120,ENSBTAP00000029826,ENSBTAP00000029827,ENSBTAP00000067912,ENSBTAT00000029830,ENSBTAT00000029831,ENSBTAT00000066448,F1MAV0,FGB,FGB-201,FGB-202,FIBB_BOVIN,Fibrinogen beta chain,Fibrinogen beta chain precursor,Fibrinopeptide B,NM_001142917,NM_001142917.1,NP_001136389,NP_001136389.1,P02676,UPI000FC48D79,UPI000FC4F83D,bta:510522
FGFRL1	9913.ENSBTAP00000039238	Fibroblast growth factor receptor like 1.	https://smart.embl.de/smart/DDvec.cgi?smart=501:SIGNAL(1|23)+IGc2(41|105)+IGc2(162|227)+IG(252|355)+TRANS(376|398)+	532327,ENSBTAG00000027464,ENSBTAP00000039238,ENSBTAT00000039444,F1MQI5,F1MQI5_BOVIN,FGFRL1,FGFRL1-201,Fibroblast growth factor receptor like 1,Fibroblast growth factor receptor-like 1,NM_001205996.1,NM_001354198,NM_001354198.1,NP_001192925.1,NP_001341127,NP_001341127.1,R-BTA-162582,R-BTA-190236,R-BTA-5654736,R-BTA-5658623,R-BTA-9006934,UPI0000615EF2,XM_024993272,XM_024993272.1,XP_024849040,XP_024…
FGG	9913.ENSBTAP00000008877	Fibrinogen gamma-B chain; Together with fibrinogen alpha (FGA) and fibrinogen beta (FGB), polymerizes to form an insoluble fibrin matrix. Has a major function in hemostasis as one of the primary components of blood clots. In addition, functions during the early stages of wound repair to stabilize the lesion and guide cell migration during re- epithelialization. Was originally thought to be essent…	https://smart.embl.de/smart/DDvec.cgi?smart=443:SIGNAL(1|24)+Fib_alpha(27|171)+FBG(172|413)+	1DEQ,1JY2,1JY3,280792,A0A3Q1MV91,A0A3Q1N064,AAI02630.1,BC102629,ENSBTAG00000006745,ENSBTAP00000008877,ENSBTAP00000046432,ENSBTAP00000058875,ENSBTAP00000061998,ENSBTAT00000008877,ENSBTAT00000049554,ENSBTAT00000068601,ENSBTAT00000079494,F1MGU7,FGG,FGG-201,FGG-202,FGG-203,FGG-204,FIBG_BOVIN,Fibrinogen gamma chain,Fibrinogen gamma-B chain,Fibrinogen gamma-B chain precursor,Gamma,NM_173911,NM_173911.2…
FMO5	9913.ENSBTAP00000014385	Dimethylaniline monooxygenase [N-oxide-forming].	https://smart.embl.de/smart/DDvec.cgi?smart=533:Pfam_Pyr_redox_2(4|351)+	1.14.13.8,788719,A6QLN7,A6QLN7_BOVIN,AAI48031.1,BC148030,Dimethylaniline monooxygenase (N-oxide forming),Dimethylaniline monooxygenase [N-oxide-forming],EC 1.14.13.8,ENSBTAG00000010841,ENSBTAP00000014385,ENSBTAT00000014385,FMO5,FMO5-201,Flavin containing dimethylaniline monoxygenase 5,NM_001101304,NM_001101304.1,NP_001094774,NP_001094774.1,UPI000057FC74,XM_005203997,XM_005203997.3,XM_005203997.4,…
FN1	9913.ENSBTAP00000010925	Fibronectin; Fibronectins bind cell surfaces and various compounds including collagen, fibrin, heparin, DNA, and actin. Fibronectins are involved in cell adhesion, cell motility, opsonization, wound healing, and maintenance of cell shape. Involved in osteoblast compaction through the fibronectin fibrillogenesis cell-mediated matrix assembly process, essential for osteoblast mineralization. Partic…	https://smart.embl.de/smart/DDvec.cgi?smart=2601:FN1(176|216)+FN1(221|264)+FN1(265|308)+FN1(310|354)+FN1(355|399)+FN1(432|471)+FN2(477|525)+FN2(537|585)+FN1(594|637)+FN1(642|684)+FN1(685|728)+FN3(733|814)+FN3(841|923)+FN3(935|1013)+FN3(1031|1110)+FN3(1121|1199)+FN3(1211|1285)+FN3(1298|1380)+FN3(1389|1471)+FN3(1482|1562)+FN3(1573|1652)+FN3(1663|1742)+FN3(1757|1836)+FN3(1847|1926)+FN3(1937|2016)+FN…	280794,A0A3Q1M4K6,A0A3Q1NHX9,Anastellin,ENSBTAG00000008300,ENSBTAP00000010922,ENSBTAP00000010923,ENSBTAP00000010925,ENSBTAP00000010926,ENSBTAP00000010927,ENSBTAP00000044004,ENSBTAP00000063196,ENSBTAP00000071585,ENSBTAT00000010922,ENSBTAT00000010923,ENSBTAT00000010925,ENSBTAT00000010926,ENSBTAT00000010927,ENSBTAT00000046738,ENSBTAT00000066855,ENSBTAT00000082918,FINC_BOVIN,FN,FN1,FN1-201,FN1-202,FN…
FN3KRP	9913.ENSBTAP00000020456	Fructosamine 3 kinase related protein; Belongs to the fructosamine kinase family.	https://smart.embl.de/smart/DDvec.cgi?smart=309:Pfam_APH(22|266)+	2.7.1.172,615868,AAI20336.1,BC120335,EC 2.7.1.172,ENSBTAG00000015390,ENSBTAP00000020456,ENSBTAT00000020456,F1MII4,FN3KRP,FN3KRP-201,Fructosamine 3 kinase related protein,Ketosamine-3-kinase,NM_001076399,NM_001076399.1,NP_001069867,NP_001069867.1,Protein-ribulosamine 3-kinase,Q0P592,Q0P592_BOVIN,R-BTA-163841,R-BTA-392499,R-BTA-597592,UPI00005BF346,XM_005221062,XM_005221062.2,XM_005221063,XM_005221…
FNIP2	9913.ENSBTAP00000070282	Folliculin interacting protein 2.	https://smart.embl.de/smart/DDvec.cgi?smart=1110:Pfam_FNIP_N(64|113)+Pfam_FNIP_N(114|177)+Pfam_FNIP_M(336|570)+Pfam_FNIP_C(923|1106)+	100138353,A0A3Q1LFX2,A0A3Q1LMW7,A0A3Q1M142,A0A3Q1MB64,A0A3Q1NF19,A0A3Q1NF19_BOVIN,ENSBTAG00000011970,ENSBTAP00000015882,ENSBTAP00000029744,ENSBTAP00000029745,ENSBTAP00000057177,ENSBTAP00000058078,ENSBTAP00000066988,ENSBTAP00000070282,ENSBTAP00000071283,ENSBTAT00000015882,ENSBTAT00000029747,ENSBTAT00000029748,ENSBTAT00000067422,ENSBTAT00000067933,ENSBTAT00000070927,ENSBTAT00000081446,ENSBTAT000000…
FRMPD3	9913.ENSBTAP00000004058	FERM and PDZ domain containing 3.	https://smart.embl.de/smart/DDvec.cgi?smart=1738:PDZ(30|98)+B41(143|367)+	517537,ENSBTAG00000003121,ENSBTAP00000004058,ENSBTAT00000004058,FERM and PDZ domain containing 3,FRMPD3,FRMPD3-201,G3X6D0,G3X6D0_BOVIN,R-BTA-168249,R-BTA-168256,R-BTA-6798695,UPI00023AD223,XM_015461596,XM_015461596.2,XM_015461597,XM_015461597.2,XM_024988610,XM_024988610.1,XM_024988611,XM_024988611.1,XP_015317082,XP_015317082.1,XP_015317083,XP_015317083.1,XP_024844378,XP_024844378.1,XP_024844379,X…
G3MX06_BOVIN	9913.ENSBTAP00000054064	Ig-like domain-containing protein.	https://smart.embl.de/smart/DDvec.cgi?smart=124:SIGNAL(1|21)+IGv(39|111)+	A0A3Q1LZD5,ENSBTAG00000045514,ENSBTAP00000054064,ENSBTAP00000061062,ENSBTAT00000065803,ENSBTAT00000081196,G3MX06,G3MX06_BOVIN,Ig-like domain-containing protein,UPI000FC4D00B,UPI000FC4D388
G3N0V0_BOVIN	9913.ENSBTAP00000055469	Uncharacterized protein.	https://smart.embl.de/smart/DDvec.cgi?smart=326:IGc1(22|92)+Pfam_C1-set(117|205)+IGc1(239|314)+	A0A3Q1N3I9,ENSBTAG00000048135,ENSBTAP00000055469,ENSBTAP00000064097,ENSBTAT00000066155,ENSBTAT00000076973,G3N0V0,G3N0V0_BOVIN,R-BTA-168249,R-BTA-168256,R-BTA-2029480,R-BTA-2029482,R-BTA-2029485,UPI0002263A13,UPI000FC47CDE,Uncharacterized protein
G3N188_BOVIN	9913.ENSBTAP00000055618	Ig-like domain-containing protein.	https://smart.embl.de/smart/DDvec.cgi?smart=218:SIGNAL(1|26)+IGv(43|123)+TRANS(194|216)+	ENSBTAG00000048048,ENSBTAP00000054499,ENSBTAP00000055618,ENSBTAT00000065970,ENSBTAT00000066212,G3MY71,G3N188,G3N188_BOVIN,Ig-like domain-containing protein,UPI000FC44EEA,UPI000FC4B3E5
G3N342_BOVIN	9913.ENSBTAP00000056315	Uncharacterized protein.	https://smart.embl.de/smart/DDvec.cgi?smart=491:IGc1(85|155)+IGc1(189|263)+Pfam_ig(283|374)+IGc1(401|478)+	ENSBTAG00000047632,ENSBTAP00000056315,ENSBTAT00000065204,G3N342,G3N342_BOVIN,UPI000FC4E183,Uncharacterized protein
G5E5V1_BOVIN	9913.ENSBTAP00000032915	Ig-like domain-containing protein.	https://smart.embl.de/smart/DDvec.cgi?smart=136:IGv(17|91)+	ENSBTAG00000047529,ENSBTAP00000032915,ENSBTAT00000032988,G5E5V1,G5E5V1_BOVIN,Ig-like domain-containing protein,UPI000FC4B052
G5E604_BOVIN	9913.ENSBTAP00000046041	Ig-like domain-containing protein.	https://smart.embl.de/smart/DDvec.cgi?smart=123:IGv(32|107)+	ENSBTAG00000039237,ENSBTAP00000046041,ENSBTAP00000051240,ENSBTAT00000049105,ENSBTAT00000052454,G5E604,G5E604_BOVIN,Ig-like domain-containing protein,UPI000FC4E3E0
G5E6L5_BOVIN	9913.ENSBTAP00000055652	Uncharacterized protein.	http://smart.embl.de/smart/DDvec.cgi?smart=807:	ENSBTAG00000051348,ENSBTAP00000054733,ENSBTAP00000055652,ENSBTAT00000063396,ENSBTAT00000065117,G3MYU4,G5E6L5,G5E6L5_BOVIN,UPI000FC476AF,UPI000FC4CF33,Uncharacterized protein
GABBR1	9913.ENSBTAP00000022907	Gamma-aminobutyric acid type B receptor subunit 1.	https://smart.embl.de/smart/DDvec.cgi?smart=961:SIGNAL(1|19)+CCP(30|96)+CCP(100|157)+Pfam_ANF_receptor(187|546)+Pfam_7tm_3(603|859)+	513785,A0A3Q1MBN0,ENSBTAG00000017239,ENSBTAP00000022907,ENSBTAP00000022918,ENSBTAP00000022922,ENSBTAP00000035540,ENSBTAP00000035544,ENSBTAP00000035545,ENSBTAP00000066088,ENSBTAT00000022907,ENSBTAT00000022918,ENSBTAT00000022922,ENSBTAT00000035670,ENSBTAT00000035674,ENSBTAT00000035675,ENSBTAT00000077860,F1MF15,F1MF15_BOVIN,GABBR1,GABBR1-201,GABBR1-202,Gamma-aminobutyric acid type B receptor,NM_0010…
GCNT3	9913.ENSBTAP00000012427	Beta-1,3-galactosyl-O-glycosyl-glycoprotein beta-1,6-N-acetylglucosaminyltransferase 3; Glycosyltransferase that can synthesize all known mucin beta 6 N-acetylglucosaminides. Mediates core 2 and core 4 O-glycan branching, 2 important steps in mucin-type biosynthesis. Has also I- branching enzyme activity by converting linear into branched poly-N- acetyllactosaminoglycans, leading to introduce the…	https://smart.embl.de/smart/DDvec.cgi?smart=440:TRANS(13|30)+Pfam_Branch(136|404)+	2.4.1.-,2.4.1.102,2.4.1.148,2.4.1.150,404167,AAO22165.1,AAP76324.1,AAP76325.1,AAP76326.1,AAP76327.1,AAP76328.1,AF465338,AY283763,AY283764,AY283765,AY283766,AY283767,C2GnT-M,C2GnT-mucin type,EC 2.4.1.-,ENSBTAG00000009443,ENSBTAP00000012427,ENSBTAP00000031195,ENSBTAP00000064426,ENSBTAT00000012427,ENSBTAT00000031239,ENSBTAT00000079217,GCNT3,GCNT3-201,GCNT3-202,GCNT3_BOVIN,N-acetylglucosaminyltransfe…
GID4	9913.ENSBTAP00000011595	GID complex subunit 4 homolog.	https://smart.embl.de/smart/DDvec.cgi?smart=217:Pfam_Vac_ImportDeg(38|206)+	509503,ENSBTAG00000008802,ENSBTAP00000011595,ENSBTAT00000011595,F1N0P9,F1N0P9_BOVIN,GID complex subunit 4 homolog,GID4,GID4-201,Glucose-induced degradation protein 4,Glucose-induced degradation protein 4 homolog,NM_001199762,NM_001199762.1,NP_001186691,NP_001186691.1,UPI0001EF55B8,bta:509503
GMIP	9913.ENSBTAP00000020147	GEM interacting protein.	https://smart.embl.de/smart/DDvec.cgi?smart=965:C1(487|532)+RhoGAP(557|749)+	533029,A4FV18,A4FV18_BOVIN,AAI23614.1,BC123613,ENSBTAG00000015144,ENSBTAP00000020147,ENSBTAP00000036331,ENSBTAT00000020147,ENSBTAT00000036473,F1MX85,GEM interacting protein,GEM-interacting protein,GMIP,GMIP protein,GMIP-201,NM_001083465,NM_001083465.2,NP_001076934,NP_001076934.1,R-BTA-162582,R-BTA-194315,R-BTA-194840,UPI0000F54C59,XM_024994344,XM_024994344.1,XM_024994345,XM_024994345.1,XP_0248501…
GMPPB	9913.ENSBTAP00000015403	Mannose-1-phosphate guanyltransferase beta; Catalyzes the formation of GDP-mannose, an essential precursor of glycan moieties of glycoproteins and glycolipids.	https://smart.embl.de/smart/DDvec.cgi?smart=360:Pfam_NTP_transf_3(3|203)+Pfam_Hexapep(259|294)+	2.7.7.13,514161,EC 2.7.7.13,ENSBTAG00000032026,ENSBTAP00000015403,ENSBTAT00000015403,F1N7H5,GDP-mannose pyrophosphorylase B,GMPPB,GMPPB-201,GMPPB_BOVIN,GTP-mannose-1-phosphate guanylyltransferase beta,Mannose-1-phosphate guanyltransferase beta,Mannose-1-phosphate guanylyltransferase,NM_001046168,NM_001046168.2,NP_001039633,NP_001039633.1,Q2YDJ9,UPI00005BF920,XM_024982644,XM_024982644.1,XP_0248384…
GSDMB	9913.ENSBTAP00000017083	Gasdermin B.	https://smart.embl.de/smart/DDvec.cgi?smart=443:Pfam_Gasdermin(4|76)+Pfam_Gasdermin(106|278)+Pfam_Gasdermin(269|418)+	509296,ENSBTAG00000012854,ENSBTAP00000017083,ENSBTAP00000017084,ENSBTAT00000017083,ENSBTAT00000017084,F1MCQ4,F1MCQ4_BOVIN,GSDMB,GSDMB-201,Gasdermin B,Gasdermin-B,NM_001244217,NM_001244217.1,NP_001231146,NP_001231146.1,UPI000D534544,XM_015458830,XM_015458830.2,XM_015458831,XM_015458831.2,XM_015458832,XM_015458832.2,XP_015314316,XP_015314316.2,XP_015314317,XP_015314317.2,XP_015314318,XP_015314318.2…
HABP4	9913.ENSBTAP00000015392	Hyaluronan binding protein 4.	https://smart.embl.de/smart/DDvec.cgi?smart=417:Pfam_IHABP4_N(18|167)+HABP4_PAI-RBP1(216|321)+	514807,A0A3Q1M5D0,ENSBTAG00000011586,ENSBTAP00000015390,ENSBTAP00000015392,ENSBTAP00000068857,ENSBTAT00000015390,ENSBTAT00000015392,ENSBTAT00000084746,F6RT22,F6RT22_BOVIN,HABP4,HABP4-201,HABP4-202,Hyaluronan binding protein 4,Intracellular hyaluronan-binding protein 4,NM_001081523,NM_001081523.1,NP_001074992,NP_001074992.1,R-BTA-109582,R-BTA-114608,R-BTA-76002,R-BTA-76005,UPI000D5382C1,UPI000FC44…
HAL	9913.ENSBTAP00000065003	Histidine ammonia-lyase.	https://smart.embl.de/smart/DDvec.cgi?smart=692:Pfam_DUF3534(3|87)+Pfam_Lyase_aromatic(156|620)+	4.3.1.3,615205,A0A3Q1LTF3,A0A3Q1M559,A0A3Q1MAY2,A7YWP4,AAI34686.1,BC134685,ENSBTAG00000016276,ENSBTAP00000021649,ENSBTAP00000063740,ENSBTAP00000065003,ENSBTAP00000071205,ENSBTAT00000021649,ENSBTAT00000068170,ENSBTAT00000078281,ENSBTAT00000085338,HAL,HAL-201,HAL-202,HAL-203,HAL-204,HUTH_BOVIN,Histidase,Histidine ammonia-lyase,NM_001105440,NM_001105440.1,NP_001098910,NP_001098910.1,R-BTA-1430728,R-…
HCN4	9913.ENSBTAP00000023219	Hyperpolarization activated cyclic nucleotide gated potassium channel 4.	https://smart.embl.de/smart/DDvec.cgi?smart=1201:Pfam_Ion_trans_N(220|263)+Pfam_Ion_trans(264|527)+cNMP(597|710)+	785689,E1BIS4,E1BIS4_BOVIN,ENSBTAG00000017466,ENSBTAP00000023219,ENSBTAP00000038712,ENSBTAT00000023219,ENSBTAT00000038906,HCN4,HCN4-201,R-BTA-112316,R-BTA-1296061,R-BTA-1296071,UPI000D533DB8,XM_002690493,XM_002690493.5,XM_024997938,XM_024997938.1,XP_002690539,XP_002690539.2,XP_024853706,XP_024853706.1,bta:785689
HERC6	9913.ENSBTAP00000027362	HECT and RLD domain containing E3 ubiquitin protein ligase family member 6.	https://smart.embl.de/smart/DDvec.cgi?smart=1017:Pfam_RCC1_2(26|54)+Pfam_RCC1(93|143)+Pfam_RCC1(146|196)+Pfam_RCC1_2(238|267)+HECTc(687|1013)+	2.3.2.-,527520,E3 ISG15--protein ligase,EC 2.3.2.-,ENSBTAG00000020536,ENSBTAP00000027362,ENSBTAP00000027363,ENSBTAT00000027362,ENSBTAT00000027363,F1N7C1,F1N7C1_BOVIN,HERC6,HERC6-201,NM_001192644,NM_001192644.2,NP_001179573,NP_001179573.3,Probable E3 ubiquitin-protein ligase HERC6,R-BTA-1280218,R-BTA-168256,R-BTA-983168,R-BTA-983169,UPI000D53579B,XM_010806029,XM_010806029.3,XM_024993241,XM_0249932…
HHIP	9913.ENSBTAP00000021390	Hedgehog interacting protein.	https://smart.embl.de/smart/DDvec.cgi?smart=700:SIGNAL(1|17)+Pfam_Folate_rec(38|220)+Pfam_GSDH(226|444)+EGF(607|635)+EGF(638|667)+	540830,A5PJW9,A5PJW9_BOVIN,AAI42269.1,AAI42423.1,BC142268,BC142422,ENSBTAG00000016071,ENSBTAP00000021390,ENSBTAT00000021390,F1N5N4,HHIP,HHIP protein,HHIP-201,Hedgehog interacting protein,Hedgehog-interacting protein precursor,NM_001099114,NM_001099114.2,NP_001092584,NP_001092584.1,R-BTA-162582,R-BTA-5358351,R-BTA-5632681,R-BTA-5632684,UPI000155D749,bta:540830
HIPK4	9913.ENSBTAP00000051851	Homeodomain interacting protein kinase 4.	https://smart.embl.de/smart/DDvec.cgi?smart=865:S_TKc(260|596)+	2.7.11.1,520157,E1BB49,E1BB49_BOVIN,EC 2.7.11.1,ENSBTAG00000040067,ENSBTAP00000051851,ENSBTAT00000052307,HIPK4,HIPK4-201,Homeodomain interacting protein kinase,Homeodomain interacting protein kinase 4,Homeodomain-interacting protein kinase 4,UPI000FC4A43B,XM_002694990,XM_002694990.5,XP_002695036,XP_002695036.1,bta:520157
HNRNPH1	9913.ENSBTAP00000074169	Heterogeneous nuclear ribonucleoprotein H1.	https://smart.embl.de/smart/DDvec.cgi?smart=472:RRM(12|86)+RRM(112|184)+RRM(290|360)+	541202,A0A3Q1LU71,A0A3Q1MIG4,A0A3Q1MIM4,A0A3Q1MIM4_BOVIN,A0A3Q1N348,E1BF20,ENSBTAG00000009389,ENSBTAP00000012353,ENSBTAP00000012357,ENSBTAP00000063780,ENSBTAP00000064058,ENSBTAP00000071066,ENSBTAP00000074169,ENSBTAT00000012353,ENSBTAT00000012357,ENSBTAT00000068240,ENSBTAT00000076005,ENSBTAT00000077198,ENSBTAT00000081998,HNRNPH1,HNRNPH1-201,HNRNPH1-202,HNRNPH1-203,HNRNPH1-204,HNRNPH1-205,Heterogen…
HP	9913.ENSBTAP00000071329	Haptoglobin alpha chain; As a result of hemolysis, hemoglobin is found to accumulate in the kidney and is secreted in the urine. Haptoglobin captures, and combines with free plasma hemoglobin to allow hepatic recycling of heme iron and to prevent kidney damage. Haptoglobin also acts as an antioxidant, has antibacterial activity and plays a role in modulating many aspects of the acute phase respon…	https://smart.embl.de/smart/DDvec.cgi?smart=390:CCP(19|70)+CCP(76|129)+Tryp_SPc(145|383)+	280692,A0A3Q1MB98,ENSBTAG00000006354,ENSBTAP00000008335,ENSBTAP00000032247,ENSBTAP00000071329,ENSBTAT00000008335,ENSBTAT00000032312,ENSBTAT00000086849,G3X6K8,HP,HP-201,HP-202,HPT_BOVIN,Haptoglobin,Haptoglobin alpha chain,Haptoglobin beta chain,Haptoglobin precursor,NM_001040470,NM_001040470.2,NP_001035560,NP_001035560.1,Q2TBU0,UPI000FC44448,UPI000FC48EDA,bta:280692
HPX	9913.ENSBTAP00000004635	Hemopexin; Binds heme and transports it to the liver for breakdown and iron recovery, after which the free hemopexin returns to the circulation.	https://smart.embl.de/smart/DDvec.cgi?smart=459:SIGNAL(1|23)+HX(58|97)+HX(99|142)+HX(189|232)+HX(256|299)+HX(301|346)+HX(353|394)+	534509,A0A3Q1N2E0,A0A452DI25,ENSBTAG00000003564,ENSBTAP00000004635,ENSBTAP00000063422,ENSBTAT00000004635,ENSBTAT00000068569,HEMO_BOVIN,HPX,HPX-201,HPX-202,Hemopexin,Hemopexin precursor,NM_001034612,NM_001034612.2,NP_001029784,NP_001029784.1,Q3SZV7,R-BTA-2168880,R-BTA-2173782,R-BTA-5653656,UPI00005BE3D0,UPI000FC4FD5F,bta:534509
HTRA2	9913.ENSBTAP00000026804	Serine protease HTRA2, mitochondrial; Serine protease that shows proteolytic activity against a non-specific substrate beta-casein. Promotes or induces cell death either by direct binding to and inhibition of BIRC proteins (also called inhibitor of apoptosis proteins, IAPs), leading to an increase in caspase activity, or by a BIRC inhibition-independent, caspase- independent and serine protease a…	https://smart.embl.de/smart/DDvec.cgi?smart=458:TRANS(105|124)+Tryp_SPc(165|342)+PDZ(350|445)+	3.4.21.108,523039,A0JNK3,AAI26738.1,BC126737,EC 3.4.21.108,ENSBTAG00000020124,ENSBTAP00000026804,ENSBTAT00000026804,HTRA2,HTRA2-201,HTRA2_BOVIN,HtrA serine peptidase 2,NM_001077956,NM_001077956.1,NP_001071424,NP_001071424.1,S01.278,Serine protease HTRA2, mitochondrial,Serine protease HTRA2, mitochondrial precursor,UPI00005821FA,bta:523039
HUWE1	9913.ENSBTAP00000008060	HECT, UBA and WWE domain containing E3 ubiquitin protein ligase 1.	https://smart.embl.de/smart/DDvec.cgi?smart=4375:Pfam_DUF908(88|368)+Pfam_DUF913(430|814)+UBA(1318|1354)+Pfam_WWE(1615|1679)+Pfam_DUF4414(2968|3079)+HECTc(4037|4375)+	2.3.2.26,511826,A0A3Q1LSM9,E1BNY9,E1BNY9_BOVIN,E3 ubiquitin-protein ligase HUWE1,EC 2.3.2.26,ENSBTAG00000006122,ENSBTAP00000000077,ENSBTAP00000008060,ENSBTAP00000058088,ENSBTAT00000000077,ENSBTAT00000008060,ENSBTAT00000072234,HUWE1,HUWE1-201,HUWE1-202,NM_001110004,NM_001110004.1,NP_001103474,NP_001103474.1,R-BTA-1280218,R-BTA-168249,R-BTA-168256,R-BTA-6798695,R-BTA-983168,R-BTA-983169,UPI0000EBF2…
IGFLR1	9913.ENSBTAP00000057282	IGF-like family receptor 1; Probable cell membrane receptor for the IGF-like family protein IGFL.	https://smart.embl.de/smart/DDvec.cgi?smart=396:TRANS(199|221)+	617594,A0A3Q1LLA3,A5PJC7,AAI42052.1,BC142051,ENSBTAG00000002764,ENSBTAP00000003585,ENSBTAP00000003586,ENSBTAP00000057282,ENSBTAT00000003585,ENSBTAT00000003586,ENSBTAT00000074758,IGF like family receptor 1,IGF-like family receptor 1,IGF-like family receptor 1 precursor,IGFLR1,IGFLR1-201,IGFLR1-202,IGFR1_BOVIN,NM_001099167,NM_001099167.2,NP_001092637,NP_001092637.1,TMEM149,Transmembrane protein 149…
INF2	9913.ENSBTAP00000012349	Uncharacterized protein.	https://smart.embl.de/smart/DDvec.cgi?smart=523:Pfam_FH2(10|201)+WH2(254|269)+	538493,ENSBTAG00000007187,ENSBTAP00000009456,ENSBTAP00000009460,ENSBTAP00000012349,ENSBTAT00000009456,ENSBTAT00000009460,ENSBTAT00000012349,G5E5C0,G5E5C0_BOVIN,INF2,Inverted formin, FH2 and WH2 domain containing,Inverted formin-2 isoform X1,UPI000FC47270,Uncharacterized protein,XM_024982196,XM_024982196.1,XM_024982197,XM_024982197.1,XM_024982198,XM_024982198.1,XP_024837964,XP_024837964.1,XP_02483…
INKA1	9913.ENSBTAP00000016348	Inka box actin regulator 1.	https://smart.embl.de/smart/DDvec.cgi?smart=337:Pfam_FAM212(200|255)+	616365,ENSBTAG00000012322,ENSBTAP00000016348,ENSBTAT00000016348,F6Q4I8,F6Q4I8_BOVIN,FAM212A,INKA1,INKA1-201,Inka box actin regulator 1,NM_001105446,NM_001105446.1,NP_001098916,NP_001098916.1,PAK4-inhibitor INKA1,UPI00005BF921,bta:616365
INTS2	9913.ENSBTAP00000016011	Integrator complex subunit 2.	https://smart.embl.de/smart/DDvec.cgi?smart=1204:Pfam_INTS2(30|1137)+	534471,A0A3Q1LQZ5,A0A3Q1LVP3,A0A3Q1MMN6,A0A3Q1MYE6,A0A3Q1NN14,E1BJI9,E1BJI9_BOVIN,ENSBTAG00000012070,ENSBTAP00000016011,ENSBTAP00000045959,ENSBTAP00000045964,ENSBTAP00000045973,ENSBTAP00000045977,ENSBTAP00000045981,ENSBTAP00000045988,ENSBTAP00000059398,ENSBTAP00000061069,ENSBTAP00000064721,ENSBTAP00000072435,ENSBTAP00000074068,ENSBTAT00000016011,ENSBTAT00000049012,ENSBTAT00000049016,ENSBTAT000000…
INTS3	9913.ENSBTAP00000008186	Integrator complex subunit 3.	https://smart.embl.de/smart/DDvec.cgi?smart=1040:Pfam_Ints3(268|492)+	511052,A0A3Q1M9M9,E1BN70,E1BN70_BOVIN,ENSBTAG00000006235,ENSBTAP00000008186,ENSBTAP00000066880,ENSBTAP00000072609,ENSBTAT00000008186,ENSBTAT00000079413,ENSBTAT00000082569,INTS3,INTS3-201,INTS3-202,INTS3-203,Integrator complex subunit 3,NM_001193087,NM_001193087.1,NP_001180016,NP_001180016.1,R-BTA-6807505,R-BTA-73857,R-BTA-74160,UPI00005BBF56,UPI000FC46476,XM_024987373,XM_024987373.1,XM_024987375,…
INTS6	9913.ENSBTAP00000003868	Integrator complex subunit 6.	https://smart.embl.de/smart/DDvec.cgi?smart=887:VWA(1|158)+Pfam_INT_SG_DDX_CT_C(807|869)+	509695,A0A3Q1LW42,E1BF57,E1BF57_BOVIN,ENSBTAG00000002970,ENSBTAP00000003868,ENSBTAP00000064908,ENSBTAT00000003868,ENSBTAT00000066949,INTS6,INTS6-201,INTS6-202,Integrator complex subunit 6,Integrator complex subunit 6 isoform X1,R-BTA-6807505,R-BTA-73857,R-BTA-74160,UPI0007603DF1,UPI000D53154F,XM_025000045,XM_025000045.1,XM_025000046,XM_025000046.1,XM_025000047,XM_025000047.1,XM_025000048,XM_02500…
IQSEC3	9913.ENSBTAP00000025372	IQ motif and Sec7 domain 3.	https://smart.embl.de/smart/DDvec.cgi?smart=1183:Sec7(647|838)+PH(869|980)+	786925,A0A3Q1M506,A0A3Q1MYH3,ENSBTAG00000019058,ENSBTAP00000025372,ENSBTAP00000061117,ENSBTAP00000063357,ENSBTAT00000025372,ENSBTAT00000072203,ENSBTAT00000083832,G5E5L9,G5E5L9_BOVIN,IQ motif and SEC7 domain-containing protein,IQ motif and Sec7 domain 3,IQSEC3,IQSEC3-201,IQSEC3-202,IQSEC3-203,UPI000572E1E1,UPI000FC4C289,UPI000FC4C4B3,XM_024992702,XM_024992702.1,XM_024992703,XM_024992703.1,XM_02499…
ITGAE	9913.ENSBTAP00000020307	Integrin subunit alpha E; Belongs to the integrin alpha chain family.	https://smart.embl.de/smart/DDvec.cgi?smart=1162:VWA(184|371)+Int_alpha(438|490)+Int_alpha(492|549)+Int_alpha(555|612)+Int_alpha(624|676)+TRANS(1108|1130)+	100140050,A0A3Q1LLW3,A0A3Q1M4X7,A0A3Q1M9L9,A0A3Q1MAK2,A0A3Q1MX61,A0A3Q1N0K5,A0A3Q1NJC5,A0A3Q1NNQ8,E1BFX5,E1BFX5_BOVIN,ENSBTAG00000015264,ENSBTAP00000020307,ENSBTAP00000035012,ENSBTAP00000057785,ENSBTAP00000060263,ENSBTAP00000062255,ENSBTAP00000064891,ENSBTAP00000067260,ENSBTAP00000067642,ENSBTAP00000072236,ENSBTAP00000074544,ENSBTAT00000020307,ENSBTAT00000035134,ENSBTAT00000068024,ENSBTAT00000069…
ITGB4	9913.ENSBTAP00000074469	Integrin beta.	https://smart.embl.de/smart/DDvec.cgi?smart=1807:SIGNAL(1|27)+INB(37|456)+Integrin_B_tail(627|712)+TRANS(737|756)+Calx_beta(970|1075)+FN3(1118|1196)+FN3(1211|1298)+FN3(1514|1595)+FN3(1627|1711)+	A0A3Q1M9I5,A0A3Q1MRM3,A0A3Q1MRM3_BOVIN,E1B864,ENSBTAG00000018169,ENSBTAP00000024185,ENSBTAP00000040201,ENSBTAP00000065111,ENSBTAP00000074469,ENSBTAT00000024185,ENSBTAT00000042566,ENSBTAT00000075471,ENSBTAT00000079531,ITGB4,ITGB4-201,ITGB4-202,ITGB4-203,Integrin beta,Integrin subunit beta 4,NM_001193257,NM_001193257.2,NP_001180186,NP_001180186.2,R-BTA-1474244,R-BTA-1474290,R-BTA-1500931,R-BTA-2022…
ITIH1	9913.ENSBTAP00000010318	Inter-alpha-trypsin inhibitor heavy chain H1; May act as a carrier of hyaluronan in serum or as a binding protein between hyaluronan and other matrix protein, including those on cell surfaces in tissues to regulate the localization, synthesis and degradation of hyaluronan which are essential to cells undergoing biological processes.	https://smart.embl.de/smart/DDvec.cgi?smart=906:SIGNAL(1|22)+VIT(32|161)+VWA(285|468)+Pfam_ITI_HC_C(700|887)+	508356,A0A3Q1LVM5,A0A3Q1LW96,AAI20097.1,BC120096,ENSBTAG00000007843,ENSBTAP00000010318,ENSBTAP00000043446,ENSBTAP00000061488,ENSBTAP00000064694,ENSBTAT00000010318,ENSBTAT00000046120,ENSBTAT00000073352,ENSBTAT00000083503,F1MMP5,ITI heavy chain H1,ITI-HC1,ITIH1,ITIH1-201,ITIH1-202,ITIH1-203,ITIH1_BOVIN,Inter-alpha-inhibitor heavy chain 1,Inter-alpha-trypsin inhibitor heavy chain 1,Inter-alpha-tryps…
ITIH2	9913.ENSBTAP00000018701	Inter-alpha-trypsin inhibitor heavy chain H2.	https://smart.embl.de/smart/DDvec.cgi?smart=946:SIGNAL(1|18)+VIT(56|185)+VWA(308|494)+Pfam_ITI_HC_C(735|921)+	512164,A0A3Q1LK49,A5D7R6,A5D7R6_BOVIN,AAI40657.1,BC140656,ENSBTAG00000014075,ENSBTAP00000018701,ENSBTAP00000039306,ENSBTAP00000039307,ENSBTAP00000056872,ENSBTAT00000018701,ENSBTAT00000039513,ENSBTAT00000039514,ENSBTAT00000078190,F1MNW4,ITIH2,ITIH2 protein,ITIH2-201,ITIH2-202,Inter-alpha-trypsin inhibitor heavy chain 2,Inter-alpha-trypsin inhibitor heavy chain H2,NM_001098016,NM_001098016.2,NP_001…
JAKMIP3	9913.ENSBTAP00000066345	Janus kinase and microtubule interacting protein 3.	https://smart.embl.de/smart/DDvec.cgi?smart=867:Pfam_JAKMIP_CC3(429|627)+	614810,A0A3Q1LYY8,A0A3Q1LZN7,A0A3Q1LZN7_BOVIN,ENSBTAG00000000951,ENSBTAP00000001257,ENSBTAP00000023632,ENSBTAP00000038737,ENSBTAP00000062509,ENSBTAP00000066345,ENSBTAP00000069801,ENSBTAT00000001257,ENSBTAT00000023632,ENSBTAT00000038931,ENSBTAT00000071765,ENSBTAT00000075309,ENSBTAT00000081165,F1N3S7,JAKMIP3,JAKMIP3-201,JAKMIP3-202,JAKMIP3-203,JAKMIP3-204,UPI0002264502,UPI000FC44A2F,UPI000FC4ACCF,X…
JRKL	9913.ENSBTAP00000051509	JRK like.	https://smart.embl.de/smart/DDvec.cgi?smart=524:Pfam_CENP-B_N(4|54)+CENPB(73|139)+DDE_1(206|385)+	539736,ENSBTAG00000037488,ENSBTAP00000051509,ENSBTAT00000056224,F1MTE4,F1MTE4_BOVIN,JRK like,JRKL,JRKL-201,Jerky protein homolog-like,UPI00004EEF08,XM_005194559.3,XM_005215769,XM_005215769.3,XM_005215769.4,XP_005194616.1,XP_005215826,XP_005215826.1,bta:539736
KCNJ5	9913.ENSBTAP00000073898	G protein-activated inward rectifier potassium channel 4; This potassium channel is controlled by G proteins. Inward rectifier potassium channels are characterized by a greater tendency to allow potassium to flow into the cell rather than out of it. Their voltage dependence is regulated by the concentration of extracellular potassium; as external potassium is raised, the voltage range of the chan…	https://smart.embl.de/smart/DDvec.cgi?smart=419:Pfam_IRK(54|378)+	539844,Cardiac inward rectifier,DAAA02063265,ENSBTAG00000006902,ENSBTAP00000009059,ENSBTAP00000073898,ENSBTAT00000009059,ENSBTAT00000079814,F1MYR9,GIRK-4,GIRK4,Heart KATP channel,Inward rectifier K(+) channel Kir3.4,KATP-1,KCNJ5,KCNJ5-201,KCNJ5_BOVIN,UPI00004EFE89,XM_002699224,XM_002699224.4,XM_002699224.5,XM_005197306.3,XM_005197307.3,XM_005226828,XM_005226828.3,XM_005226828.4,XM_010820964,XM_01…
KCNQ3	9913.ENSBTAP00000027546	Potassium voltage-gated channel subfamily KQT member 3; Associates with KCNQ2 or KCNQ5 to form a potassium channel with essentially identical properties to the channel underlying the native M-current, a slowly activating and deactivating potassium conductance which plays a critical role in determining the subthreshold electrical excitability of neurons as well as the responsiveness to synaptic in…	https://smart.embl.de/smart/DDvec.cgi?smart=866:Pfam_Ion_trans_2(267|356)+Pfam_KCNQ_channel(446|650)+Pfam_KCNQC3-Ank-G_bd(764|860)+	281884,A0A3Q1LXR8,AAK11221.1,AF325548,ENSBTAG00000020667,ENSBTAP00000027546,ENSBTAP00000062012,ENSBTAT00000027546,ENSBTAT00000078941,KCNQ3,KCNQ3-201,KCNQ3-202,KCNQ3_BOVIN,KQT-like 3,NM_174374,NM_174374.2,NP_776799,NP_776799.1,P58126,Potassium channel subunit alpha KvLQT3,R-BTA-112316,R-BTA-1296071,R-BTA-1296072,UPI00001279EF,UPI000FC498DF,Voltage-gated potassium channel subunit Kv7.3,XM_015474407…
KHDC3L	9913.ENSBTAP00000070542	KH domain containing 3 like, subcortical maternal complex member.	https://smart.embl.de/smart/DDvec.cgi?smart=329:Pfam_MOEP19(29|114)+	616454,A0A3Q1LRV9,A0A3Q1MIJ4,A0A3Q1MIJ4_BOVIN,E1BPE9,ENSBTAG00000034925,ENSBTAP00000046295,ENSBTAP00000046296,ENSBTAP00000059923,ENSBTAP00000070542,ENSBTAT00000049399,ENSBTAT00000049400,ENSBTAT00000077848,ENSBTAT00000081682,KHDC3-like protein,KHDC3L,KHDC3L-201,KHDC3L-202,KHDC3L-203,UPI000FC43C70,UPI000FC45AA1,UPI000FC46C4E,XM_002690018,XM_002690018.5,XP_002690064,XP_002690064.3,bta:616454
KIAA1109	9913.ENSBTAP00000070593	FSA_C domain-containing protein.	https://smart.embl.de/smart/DDvec.cgi?smart=4548:FSA_C(3929|4533)+	100297914,A0A3Q1LLH9,A0A3Q1M301,A0A3Q1M9E6,A0A3Q1M9E6_BOVIN,ENSBTAG00000048798,ENSBTAP00000060626,ENSBTAP00000067830,ENSBTAP00000070593,ENSBTAT00000071481,ENSBTAT00000073536,ENSBTAT00000078645,FSA_C domain-containing protein,KIAA1109,KIAA1109 ortholog,UPI000FC43F6A,UPI000FC4ABC0,UPI000FC4B82D,XM_002694408,XM_002694408.4,XM_024977596,XM_024977596.1,XM_024977597,XM_024977597.1,XM_024977598,XM_02497…
KIF16B	9913.ENSBTAP00000058862	Kinesin family member 16B; Belongs to the TRAFAC class myosin-kinesin ATPase superfamily. Kinesin family.	https://smart.embl.de/smart/DDvec.cgi?smart=1309:KISc(10|369)+FHA(480|532)+PX(1176|1278)+	532276,A0A3Q1LK85,A0A3Q1LNQ3,A0A3Q1LPC5,A0A3Q1LPC5_BOVIN,A0A3Q1LQE5,A0A3Q1M1N5,A0A3Q1NNQ3,ENSBTAG00000000939,ENSBTAP00000001242,ENSBTAP00000001243,ENSBTAP00000001244,ENSBTAP00000056922,ENSBTAP00000058862,ENSBTAP00000061664,ENSBTAP00000062398,ENSBTAP00000063645,ENSBTAP00000074533,ENSBTAT00000001242,ENSBTAT00000001243,ENSBTAT00000001244,ENSBTAT00000069934,ENSBTAT00000074146,ENSBTAT00000081698,ENSBT…
KIF2A	9913.ENSBTAP00000055986	Kinesin-like protein KIF2A; Plus end-directed microtubule-dependent motor required for normal brain development. May regulate microtubule dynamics during axonal growth. Required for normal progression through mitosis. Required for normal congress of chromosomes at the metaphase plate. Required for normal spindle dynamics during mitosis. Promotes spindle turnover. Implicated in formation of bipola…	https://smart.embl.de/smart/DDvec.cgi?smart=744:KISc(221|561)+	768014,A0A3Q1MTC7,ENSBTAG00000015022,ENSBTAP00000019998,ENSBTAP00000036685,ENSBTAP00000036686,ENSBTAP00000036687,ENSBTAP00000055986,ENSBTAP00000057876,ENSBTAT00000019998,ENSBTAT00000036833,ENSBTAT00000036834,ENSBTAT00000036835,ENSBTAT00000065595,ENSBTAT00000086816,F1N034,G3N277,KIF2A,KIF2A-201,KIF2A-202,KIF2A-203,KIF2A_BOVIN,Kinesin family member 2A,Kinesin-like protein KIF2A,NM_001077073,NM_0010…
KIN	9913.ENSBTAP00000053570	Kin17 DNA and RNA binding protein.	https://smart.embl.de/smart/DDvec.cgi?smart=392:ZnF_C2H2(26|50)+Kin17_mid(52|178)+	519670,DNA/RNA-binding protein KIN17,E1BND1,E1BND1_BOVIN,ENSBTAG00000013925,ENSBTAP00000018495,ENSBTAP00000052943,ENSBTAP00000053570,ENSBTAT00000018495,ENSBTAT00000054545,ENSBTAT00000061405,KIN,KIN-201,Kin17 DNA and RNA binding protein,NP_001094569,R-BTA-392499,R-BTA-597592,R-BTA-8876725,UPI0000EBD43C,bta:519670
KNG1	9913.ENSBTAP00000048995	Kininogen-1 heavy chain; (1) Kininogens are inhibitors of thiol proteases; (2) HMW- kininogen plays an important role in blood coagulation by helping to position optimally prekallikrein and factor XI next to factor XII; (3) HMW-kininogen inhibits the thrombin- and plasmin-induced aggregation of thrombocytes; (4) the active peptide bradykinin that is released from HMW-kininogen shows a variety of …	https://smart.embl.de/smart/DDvec.cgi?smart=621:CY(17|126)+CY(140|248)+CY(262|370)+	280833,A0A140T8C8,Bradykinin,ENSBTAG00000005122,ENSBTAP00000006755,ENSBTAP00000006757,ENSBTAP00000048995,ENSBTAT00000006755,ENSBTAT00000006757,ENSBTAT00000053071,F1MNV5,KNG1,KNG1-201,KNG1-202,KNG1_BOVIN,Kallidin I,Kallidin II,Kininogen,Kininogen 1,Kininogen I,Kininogen-1,Kininogen-1 heavy chain,Kininogen-1 light chain,Kininogen-2 isoform II precursor,Lysyl-bradykinin,NM_001113277,NM_001113277.1,N…
KRT42	9913.ENSBTAP00000059957	Keratin 42; Belongs to the intermediate filament family.	https://smart.embl.de/smart/DDvec.cgi?smart=453:Filament(94|405)+	101905591,A0A3Q1LSG0,A0A3Q1LSG0_BOVIN,A0A3Q1NAZ1,ENSBTAG00000047262,ENSBTAP00000056163,ENSBTAP00000059957,ENSBTAP00000068439,ENSBTAT00000066349,ENSBTAT00000073694,ENSBTAT00000074959,KRT42,KRT42-201,KRT42-202,Keratin 42,Keratin, type I cytoskeletal 42 isoform X1,Type I keratin, acidic,UPI00005BFA0F,UPI000FC47D38,XM_005220798,XM_005220798.3,XM_005220798.4,XM_010816292,XM_010816292.2,XM_010816292.3,…
LAG3	9913.ENSBTAP00000066027	Lymphocyte activating 3.	https://smart.embl.de/smart/DDvec.cgi?smart=544:SIGNAL(1|23)+IG(30|181)+IG(188|272)+IG(279|363)+TRANS(462|484)+	515155,A0A3Q1LYZ8,A0A3Q1LYZ8_BOVIN,AB608099,BAJ61117.1,E1B7C1,ENSBTAG00000034295,ENSBTAP00000045595,ENSBTAP00000066027,ENSBTAT00000048582,ENSBTAT00000077596,LAG3,LAG3-201,LAG3-202,Lymphocyte activating 3,NM_001245949,NM_001245949.1,NP_001232878,NP_001232878.1,R-BTA-1280218,R-BTA-168256,R-BTA-2132295,UPI00017C2B7D,UPI000572CFAB,XM_010805587,XM_010805587.2,XM_010805587.3,XM_010805589,XM_010805589.3…
LIMS2	9913.ENSBTAP00000058058	LIM and senescent cell antigen-like-containing domain protein 2; Adapter protein in a cytoplasmic complex linking beta- integrins to the actin cytoskeleton, bridges the complex to cell surface receptor tyrosine kinases and growth factor receptors.	https://smart.embl.de/smart/DDvec.cgi?smart=350:LIM(22|75)+LIM(83|134)+LIM(147|197)+LIM(205|256)+LIM(264|316)+	515401,A0A3Q1LH93,A0A3Q1LTN6,A0A3Q1M9W6,AAI05545.2,BC105544,ENSBTAG00000006262,ENSBTAP00000008216,ENSBTAP00000058058,ENSBTAP00000058499,ENSBTAP00000065285,ENSBTAP00000073227,ENSBTAT00000008216,ENSBTAT00000067215,ENSBTAT00000068304,ENSBTAT00000070942,ENSBTAT00000085482,LIM zinc finger domain containing 2,LIMS2,LIMS2-201,LIMS2-202,LIMS2-203,LIMS2-204,LIMS2-205,LIMS2_BOVIN,NM_001130751,NM_001130751.…
LNPK	9913.ENSBTAP00000065567	Lunapark, ER junction formation factor.	https://smart.embl.de/smart/DDvec.cgi?smart=473:TRANS(44|66)+TRANS(76|98)+Pfam_zinc_ribbon_10(255|305)+	533298,A0A3Q1MAH3,A0A3Q1MAH3_BOVIN,A0A3Q1MVD3,AAI19897.1,BC119896,ENSBTAG00000018061,ENSBTAP00000024045,ENSBTAP00000058957,ENSBTAP00000065567,ENSBTAP00000073686,ENSBTAT00000024045,ENSBTAT00000070341,ENSBTAT00000081995,ENSBTAT00000085956,F6RBJ1,LNPK,LNPK-201,LNPK-202,LNPK-203,LNPK-204,Lunapark, ER junction formation factor,NM_001075989,NM_001075989.1,NP_001069457,NP_001069457.1,Protein lunapark,Q0…
LOC100138645	9913.ENSBTAP00000001383	Amine oxidase.	https://smart.embl.de/smart/DDvec.cgi?smart=787:SIGNAL(1|16)+Pfam_Cu_amine_oxidN2(65|151)+Pfam_Cu_amine_oxidN3(168|268)+Pfam_Cu_amine_oxid(313|720)+	1.4.3.-,1.4.3.21,100138645,A0A452DHX8,A0A452DHX8_BOVIN,Amine oxidase,EC 1.4.3.21,ENSBTAG00000001041,ENSBTAP00000001383,ENSBTAT00000001383,LOC100138645,Primary amine oxidase, liver isozyme,Primary amine oxidase, liver isozyme isoform X1,Primary-amine oxidase,R-BTA-1430728,R-BTA-211859,R-BTA-211945,UPI00005C157F,XM_010816304,XM_010816304.2,XM_010816304.3,XM_010816305,XM_010816305.3,XM_010824198.2,X…
LOC100294723	9913.ENSBTAP00000074118	C-type lectin domain-containing protein.	https://smart.embl.de/smart/DDvec.cgi?smart=257:TRANS(58|80)+CLECT(130|246)+	100294723,A0A3Q1ML11,A0A3Q1MUA5,A0A3Q1MUA5_BOVIN,C-type lectin domain-containing protein,ENSBTAG00000053740,ENSBTAP00000069953,ENSBTAP00000074118,ENSBTAT00000070483,ENSBTAT00000070928,LOC100294723,UPI00038401EB,UPI000572B2FC,XM_002687837,XM_002687837.5,XM_002687837.6,XM_002704432.5,XM_010805553,XM_010805553.2,XM_010805554,XM_010805554.3,XM_010805555,XM_010805555.2,XM_010805556,XM_010805556.3,XM_0…
LOC100300716	9913.ENSBTAP00000055719	Ig-like domain-containing protein.	https://smart.embl.de/smart/DDvec.cgi?smart=167:SIGNAL(1|26)+IGv(43|123)+	100300716,ENSBTAG00000048268,ENSBTAP00000055719,ENSBTAP00000055814,ENSBTAT00000064325,ENSBTAT00000064623,G3N1H5,G3N1H5_BOVIN,Ig-like domain-containing protein,Immunoglobulin heavy chain,Immunoglobulin heavy variable 4-38-2,LOC100300716,UPI000FC45B0F,XM_002683998,XM_002683998.6,XP_002684044,XP_002684044.5,bta:100300716
LOC100847119	9913.ENSBTAP00000041616	Uncharacterized protein.	https://smart.embl.de/smart/DDvec.cgi?smart=233:IGv(36|108)+IGc1(150|224)+	ENSBTAG00000047121,ENSBTAP00000041616,ENSBTAT00000044102,F1MLW8,F1MLW8_BOVIN,Immunoglobulin lambda-1 light chain-like,LOC100847119,UPI0002263FC6,Uncharacterized protein,XM_024977843,XM_024977843.1,XM_024977844,XM_024977844.1,XM_024977846,XM_024977846.1,XM_024977847,XM_024977847.1,XP_024833611,XP_024833611.1,XP_024833612,XP_024833612.1,XP_024833614,XP_024833614.1,XP_024833615,XP_024833615.1
LOC100848700	9913.ENSBTAP00000058914	Uncharacterized protein.	https://smart.embl.de/smart/DDvec.cgi?smart=1262:Pfam_ABC_membrane(55|328)+AAA(400|579)+Pfam_ABC_membrane(671|914)+AAA(1000|1180)+	100848700,A0A3Q1LJM0,A0A3Q1LPI1,A0A3Q1LPI1_BOVIN,A0A3Q1N2F2,ENSBTAG00000047764,ENSBTAP00000010182,ENSBTAP00000058914,ENSBTAP00000059644,ENSBTAP00000063443,ENSBTAT00000010182,ENSBTAT00000069098,ENSBTAT00000069301,ENSBTAT00000074789,LOC100848700,Multidrug resistance-associated protein 4-like,UPI000FC45EF6,UPI000FC4B919,UPI000FC4C9DB,Uncharacterized protein,XM_024989169,XM_024989169.1,XM_024989170,X…
LOC506828	9913.ENSBTAP00000037567	Uncharacterized protein.	https://smart.embl.de/smart/DDvec.cgi?smart=1462:SIGNAL(1|24)+Pfam_A2M_N(123|213)+A2M_N_2(452|600)+A2M(752|842)+Thiol-ester_cl(949|978)+Pfam_A2M_comp(998|1253)+A2M_recep(1364|1451)+	506828,A0A3Q1LKK3,A0A3Q1LLI6,A0A3Q1M2P2,A0A3Q1M4S0,A0A3Q1M8I5,A0A3Q1MCP0,A0A3Q1MNN6,A0A3Q1NGH3,ENSBTAG00000038461,ENSBTAP00000037567,ENSBTAP00000049318,ENSBTAP00000057434,ENSBTAP00000060143,ENSBTAP00000064300,ENSBTAP00000064760,ENSBTAP00000065232,ENSBTAP00000068623,ENSBTAP00000070906,ENSBTAP00000073538,ENSBTAT00000037743,ENSBTAT00000055332,ENSBTAT00000067324,ENSBTAT00000072340,ENSBTAT00000076269,…
LOC507550	9913.ENSBTAP00000051075	Uncharacterized protein.	https://smart.embl.de/smart/DDvec.cgi?smart=618:Pfam_RBP_receptor(13|599)+	507550,ENSBTAG00000040034,ENSBTAP00000020439,ENSBTAP00000051075,ENSBTAT00000020439,ENSBTAT00000053340,F1MVQ7,F1MVQ7_BOVIN,LOC507550,NM_001098903,NM_001098903.2,NP_001092373,NP_001092373.1,UPI000179EB11,Uncharacterized LOC507550,Uncharacterized protein,Uncharacterized protein LOC507550,XM_010807984,XM_010807984.3,XM_015472544,XM_015472544.2,XM_024995532,XM_024995532.1,XP_010806286,XP_010806286.1,X…
LOC510536	9913.ENSBTAP00000032679	Uncharacterized protein.	https://smart.embl.de/smart/DDvec.cgi?smart=445:Pfam_DUF4506(59|198)+	510536,ENSBTAG00000023846,ENSBTAP00000032679,ENSBTAT00000032750,F1MIU1,F1MIU1_BOVIN,LOC510536,UPI00005C02DE,Uncharacterized protein,Uncharacterized protein C10orf88,XM_002698555,XM_002698555.5,XM_002698555.6,XM_587684.9,XP_002698601,XP_002698601.1,XP_587684.2,bta:510536
LOC510860	9913.ENSBTAP00000033374	C4b-binding protein alpha-like.	https://smart.embl.de/smart/DDvec.cgi?smart=196:SIGNAL(1|28)+CCP(30|84)+CCP(88|142)+	510860,AAI14801.1,BC114800,C4b-binding protein alpha-like,ENSBTAG00000039196,ENSBTAP00000033374,ENSBTAT00000033461,LOC510860,NM_001075473,NM_001075473.2,NP_001068941,NP_001068941.1,Q1RMN9,Q1RMN9_BOVIN,UPI0000D5B882,Uncharacterized protein LOC510860 precursor,bta:510860
LOC511240	9913.ENSBTAP00000040954	Protein HP-25 homolog 1.	https://smart.embl.de/smart/DDvec.cgi?smart=212:SIGNAL(1|34)+C1Q(80|212)+	511240,AAI12470.1,ACV32359.1,BC112469,ENSBTAG00000030683,ENSBTAP00000040953,ENSBTAP00000040954,ENSBTAT00000043377,ENSBTAT00000043378,FJ645735,HP251_BOVIN,LOC511240,NM_001046080,NM_001046080.2,NP_001039545,NP_001039545.1,Protein HP-25 homolog 1,Protein HP-25 homolog 1 precursor,Q2KIX7,UPI0000693DEA,bta:511240
LOC530348	9913.ENSBTAP00000070605	Uncharacterized protein.	https://smart.embl.de/smart/DDvec.cgi?smart=2398:SIGNAL(1|26)+LamG(44|177)+LamG(229|371)+Pfam_Cadherin_3(426|527)+Pfam_Cadherin_3(538|649)+Pfam_Cadherin_3(653|764)+Pfam_Cadherin_3(769|879)+Pfam_Cadherin_3(881|993)+Pfam_Cadherin_3(1010|1119)+Pfam_Cadherin_3(1125|1227)+Pfam_Cadherin_3(1232|1346)+Pfam_Cadherin_3(1351|1454)+Pfam_Cadherin_3(1460|1567)+Pfam_Cadherin_3(1574|1685)+Pfam_Cadherin_3(1691|18…	530348,A0A3Q1MMG5,A0A3Q1MMG5_BOVIN,Chondroitin sulfate proteoglycan 4,Chondroitin sulfate proteoglycan 4 isoform X1,ENSBTAG00000003200,ENSBTAP00000004156,ENSBTAP00000070605,ENSBTAT00000004156,ENSBTAT00000078296,F1N084,LOC530348,UPI000383C666,UPI000FC4798F,Uncharacterized protein,XM_002696335,XM_002696335.5,XM_002696335.6,XM_024981464,XM_024981464.1,XM_608817.9,XP_002696381,XP_002696381.3,XP_02483…
LOC536660	9913.ENSBTAP00000035589	Phospholipid-transporting ATPase; Belongs to the cation transport ATPase (P-type) (TC 3.A.3) family. Type IV subfamily.	https://smart.embl.de/smart/DDvec.cgi?smart=1197:Pfam_PhoLip_ATPase_N(58|121)+TRANS(124|146)+Pfam_E1-E2_ATPase(150|390)+Pfam_Cation_ATPase(515|607)+Pfam_PhoLip_ATPase_C(852|1104)+	536660,7.6.2.1,EC 7.6.2.1,ENSBTAG00000025428,ENSBTAP00000035587,ENSBTAP00000035589,ENSBTAT00000035717,ENSBTAT00000035719,F1N0B2,F1N0B2_BOVIN,LOC536660,Phospholipid-transporting ATPase,Phospholipid-transporting ATPase IB-like,R-BTA-382551,R-BTA-936837,R-BTA-983712,UPI000FC474C7,XM_025000082,XM_025000082.1,XP_024855850,XP_024855850.1,bta:536660
LOC618947	9913.ENSBTAP00000054612	Uncharacterized protein.	https://smart.embl.de/smart/DDvec.cgi?smart=189:SIGNAL(1|23)+IFabd(58|175)+	618947,ENSBTAG00000048891,ENSBTAP00000054612,ENSBTAT00000064849,G3MYH9,G3MYH9_BOVIN,Interferon alpha,Interferon alpha-B-like,LOC618947,R-BTA-1280215,R-BTA-168256,R-BTA-909733,R-BTA-912694,R-BTA-913531,UPI0000617526,Uncharacterized protein,XM_002689514,XM_002689514.4,XP_002689560,XP_002689560.2,bta:618947
LOC782698	9913.ENSBTAP00000019371	Olfactory receptor.	https://smart.embl.de/smart/DDvec.cgi?smart=341:Pfam_7tm_1(66|334)+	782698,ENSBTAG00000054501,ENSBTAP00000019371,ENSBTAT00000019371,F1N273,F1N273_BOVIN,LOC782698,Olfactory receptor,Olfactory receptor 5B12-like,UPI000FC49CB2,XM_003587030,XM_003587030.5,XP_003587078,XP_003587078.1,bta:782698
LOC788512	9913.ENSBTAP00000069046	Olfactory receptor.	https://smart.embl.de/smart/DDvec.cgi?smart=317:Pfam_7tm_1(44|291)+	788512,A0A3Q1NCE0,A0A3Q1NCE0_BOVIN,ENSBTAG00000052799,ENSBTAP00000069046,ENSBTAT00000067425,LOC788512,Olfactory receptor,Olfactory receptor 9K2,UPI000FC46426,XM_002687505,XM_002687505.5,XP_002687551,XP_002687551.4,bta:788512
LOC788939	9913.ENSBTAP00000054140	Olfactory receptor.	https://smart.embl.de/smart/DDvec.cgi?smart=320:Pfam_7TM_GPCR_Srsx(38|309)+	788939,ENSBTAG00000046913,ENSBTAP00000054140,ENSBTAT00000063814,G3MX80,G3MX80_BOVIN,LOC788939,Olfactory receptor,Olfactory receptor 52D1-like,UPI000FC4AA7E,XM_015470739,XM_015470739.2,XP_015326225,XP_015326225.2,bta:788939
LOC789817	9913.ENSBTAP00000073151	Olfactory receptor.	https://smart.embl.de/smart/DDvec.cgi?smart=318:Pfam_7tm_1(41|296)+	789817,A0A3Q1MFZ2,A0A3Q1MFZ2_BOVIN,ENSBTAG00000052864,ENSBTAP00000073151,ENSBTAT00000073666,LOC789817,Olfactory receptor,Olfactory receptor 13C2,UPI000D531B6B,XM_002689876,XM_002689876.4,XP_002689922,XP_002689922.3,bta:789817
LRBA	9913.ENSBTAP00000066900	LPS responsive beige-like anchor protein.	https://smart.embl.de/smart/DDvec.cgi?smart=2860:Pfam_Laminin_G_3(212|378)+Pfam_DUF4704(447|718)+Pfam_DUF1088(1878|2055)+Pfam_PH_BEACH(2081|2178)+Beach(2209|2486)+WD40(2584|2621)+WD40(2624|2667)+WD40(2683|2722)+WD40(2766|2804)+WD40(2807|2846)+	524279,A0A3Q1LTX7,A0A3Q1LYH2,A0A3Q1M0R9,A0A3Q1M9P3,A0A3Q1M9P3_BOVIN,A0A3Q1MGD3,A0A3Q1MN10,A0A3Q1MTF8,A0A3Q1NB30,A0A3Q1NGY7,E1BND6,ENSBTAG00000018546,ENSBTAP00000024696,ENSBTAP00000047627,ENSBTAP00000049356,ENSBTAP00000053569,ENSBTAP00000057927,ENSBTAP00000060557,ENSBTAP00000062307,ENSBTAP00000063260,ENSBTAP00000066900,ENSBTAP00000068492,ENSBTAP00000069602,ENSBTAP00000071135,ENSBTAP00000073244,ENS…
LRIG3	9913.ENSBTAP00000002883	Leucine rich repeats and immunoglobulin like domains 3.	https://smart.embl.de/smart/DDvec.cgi?smart=1119:SIGNAL(1|24)+LRRNT(46|78)+LRR(72|96)+LRR(97|119)+LRR(144|167)+LRR(168|189)+LRR(190|214)+LRR(215|237)+LRR(238|261)+LRR(262|285)+LRR_TYP(286|309)+LRR(310|333)+LRR(334|357)+LRR(358|384)+LRR_TYP(385|408)+LRR_TYP(409|432)+LRRCT(444|494)+IG(505|600)+IGc2(615|683)+IGc2(709|774)+TRANS(805|827)+	506574,E1BN69,E1BN69_BOVIN,ENSBTAG00000002227,ENSBTAP00000002883,ENSBTAP00000030150,ENSBTAT00000002883,ENSBTAT00000030165,LRIG3,LRIG3-201,NM_001205591,NM_001205591.1,NP_001192520,NP_001192520.1,UPI000057F4EB,XR_003034559,XR_003034559.1,bta:506574
LRP12	9913.ENSBTAP00000067824	LDL receptor related protein 12.	https://smart.embl.de/smart/DDvec.cgi?smart=862:CUB(50|162)+LDLa(170|205)+LDLa(217|259)+CUB(262|375)+LDLa(377|414)+LDLa(415|453)+LDLa(454|490)+	519993,A0A3Q1LUU5,A0A3Q1N9I7,A0A3Q1N9I7_BOVIN,E1BN03,ENSBTAG00000011516,ENSBTAP00000015304,ENSBTAP00000059012,ENSBTAP00000067824,ENSBTAT00000015304,ENSBTAT00000071234,ENSBTAT00000071287,LDL receptor related protein 12,LRP12,LRP12-201,LRP12-202,LRP12-203,NM_001192981,NM_001192981.1,NP_001179910,NP_001179910.1,R-BTA-1430728,R-BTA-162582,R-BTA-196854,R-BTA-2187338,R-BTA-372790,R-BTA-388396,R-BTA-418…
LRP2	9913.ENSBTAP00000005988	LDL receptor related protein 2.	https://smart.embl.de/smart/DDvec.cgi?smart=4622:LDLa(1|37)+LDLa(39|78)+LDLa(80|117)+LDLa(119|154)+LDLa(155|192)+LDLa(195|232)+LDLa(239|277)+EGF(285|321)+EGF(325|360)+LY(389|432)+LY(433|475)+LY(476|522)+LY(523|565)+LY(567|609)+EGF(636|679)+LY(706|749)+LY(750|792)+LY(793|835)+LY(836|878)+LY(879|920)+EGF(946|987)+LDLa(998|1035)+LDLa(1039|1077)+EGF_like(1082|1118)+LDLa(1122|1159)+LDLa(1160|1198)+LDL…	100337021,ENSBTAG00000004555,ENSBTAP00000005988,ENSBTAT00000005988,F1N6H1,F1N6H1_BOVIN,LDL receptor related protein 2,LRP2,LRP2-201,Low density lipoprotein-related protein 2,R-BTA-1430728,R-BTA-162582,R-BTA-196791,R-BTA-196854,R-BTA-199991,R-BTA-2187338,R-BTA-372790,R-BTA-388396,R-BTA-418594,R-BTA-556833,R-BTA-5653656,R-BTA-6806667,R-BTA-8856825,R-BTA-8856828,R-BTA-8957322,R-BTA-975634,UPI000FC46…
LTBP2	9913.ENSBTAP00000029274	Latent-transforming growth factor beta-binding protein 2; May play an integral structural role in elastic-fiber architectural organization and/or assembly. Belongs to the LTBP family.	https://smart.embl.de/smart/DDvec.cgi?smart=1963:EGF(305|334)+EGF(508|537)+Pfam_TB(671|707)+EGF_CA(731|771)+Pfam_TB(791|836)+EGF(960|999)+EGF_CA(1000|1042)+EGF_CA(1043|1082)+EGF_CA(1083|1122)+EGF_CA(1123|1163)+EGF_CA(1164|1205)+EGF_CA(1206|1247)+EGF_CA(1248|1288)+EGF_CA(1289|1330)+EGF_CA(1331|1371)+EGF_CA(1372|1415)+EGF_CA(1416|1457)+EGF(1461|1500)+Pfam_TB(1535|1579)+EGF_CA(1598|1640)+EGF_CA(1641…	281905,A0A3Q1M3H2,A0A3Q1N5V3,ENSBTAG00000021957,ENSBTAP00000029274,ENSBTAP00000065701,ENSBTAP00000068051,ENSBTAT00000029274,ENSBTAT00000076312,ENSBTAT00000077781,F1MF86,LTBP-2,LTBP2,LTBP2-201,LTBP2-202,LTBP2-203,LTBP2_BOVIN,NM_174385,NM_174385.2,NP_776810,NP_776810.1,Q28019,UPI0000F32693,UPI000FC473C3,UPI000FC4B41F,XM_015473221,XM_015473221.1,XM_024997271,XM_024997271.1,XM_024997272,XM_024997272.…
LUM	9913.ENSBTAP00000002279	Lumican; Belongs to the small leucine-rich proteoglycan (SLRP) family. SLRP class II subfamily.	https://smart.embl.de/smart/DDvec.cgi?smart=342:SIGNAL(1|18)+LRRNT(40|74)+LRR(70|92)+LRR(93|118)+LRR(119|146)+LRR(162|186)+LRR_TYP(187|210)+LRR(211|231)+LRR(232|257)+LRR(258|279)+LRR(307|332)+	280847,AAA30608.1,AAI02272.1,BC102271,ENSBTAG00000001745,ENSBTAP00000002279,ENSBTAT00000002279,KSPG,Keratan sulfate proteoglycan,L11063,LDC,LUM,LUM-201,LUM_BOVIN,Lumican,Lumican precursor,NM_173934,NM_173934.1,NP_776359,NP_776359.1,Q05443,Q3T0T2,R-BTA-1430728,R-BTA-1630316,R-BTA-1638074,R-BTA-2022854,R-BTA-2022857,R-BTA-71387,UPI000012E9AD,XM_005206042,XM_005206042.2,XP_005206099,XP_005206099.1,b…
LYN	9913.ENSBTAP00000026686	Tyrosine-protein kinase.	https://smart.embl.de/smart/DDvec.cgi?smart=512:SH3(66|122)+SH2(127|217)+TyrKc(247|497)+	2.7.10.2,534996,EC 2.7.10.2,ENSBTAG00000020034,ENSBTAP00000026686,ENSBTAP00000037156,ENSBTAP00000070085,ENSBTAT00000026686,ENSBTAT00000037322,ENSBTAT00000075171,F1N261,F1N261_BOVIN,LYN,LYN proto-oncogene, Src family tyrosine kinase,LYN-201,LYN-202,NM_001177740,NM_001177740.2,NP_001171211,NP_001171211.2,R-BTA-109582,R-BTA-114604,R-BTA-1266738,R-BTA-1280215,R-BTA-1280218,R-BTA-1433557,R-BTA-1433559…
M1AP	9913.ENSBTAP00000009183	Meiosis 1 associated protein.	http://smart.embl.de/smart/DDvec.cgi?smart=534:	541185,E1BF42,E1BF42_BOVIN,ENSBTAG00000006988,ENSBTAP00000009183,ENSBTAT00000009183,M1AP,M1AP-201,Meiosis 1 arrest protein isoform X1,Meiosis 1 associated protein,UPI000572D195,XM_010809842,XM_010809842.3,XM_024999360,XM_024999360.1,XM_024999361,XM_024999361.1,XM_024999362,XM_024999362.1,XP_010808144,XP_010808144.1,XP_024855128,XP_024855128.1,XP_024855129,XP_024855129.1,XP_024855130,XP_024855130.…
MAN2C1	9913.ENSBTAP00000009690	Mannosidase alpha class 2C member 1.	https://smart.embl.de/smart/DDvec.cgi?smart=1040:Pfam_Glyco_hydro_38(252|511)+Alpha-mann_mid(517|596)+Pfam_Glyco_hydro_38C(622|1032)+	3.2.1.24,541086,Alpha-mannosidase,Alpha-mannosidase 2C1,EC 3.2.1.24,ENSBTAG00000007368,ENSBTAP00000009690,ENSBTAP00000053404,ENSBTAT00000009690,ENSBTAT00000061572,F1MWT0,F1MWT0_BOVIN,MAN2C1,MAN2C1-201,Mannosidase alpha class 2C member 1,NM_001110085,NM_001110085.1,NP_001103555,NP_001103555.1,R-BTA-1430728,R-BTA-71387,R-BTA-8853383,UPI00005C0D7A,XM_005221979,XM_005221979.4,XM_005221980,XM_00522198…
MAP2K7	9913.ENSBTAP00000014063	Mitogen-activated protein kinase kinase 7.	https://smart.embl.de/smart/DDvec.cgi?smart=695:Pfam_Pkinase_Tyr(120|315)+TRANS(619|641)+	A0A3Q1LMF7,ENSBTAG00000010639,ENSBTAP00000014063,ENSBTAP00000042917,ENSBTAP00000058048,ENSBTAT00000014063,ENSBTAT00000045536,ENSBTAT00000073638,F1N664,F1N664_BOVIN,MAP2K7,MAP2K7-201,MAP2K7-202,Mitogen-activated protein kinase kinase 7,R-BTA-1280215,R-BTA-166016,R-BTA-166058,R-BTA-166166,R-BTA-168138,R-BTA-168142,R-BTA-168164,R-BTA-168176,R-BTA-168179,R-BTA-168181,R-BTA-168188,R-BTA-168249,R-BTA-1…
MAP3K5	9913.ENSBTAP00000011949	Mitogen-activated protein kinase kinase kinase 5.	https://smart.embl.de/smart/DDvec.cgi?smart=1366:Pfam_DUF4071(157|537)+S_TKc(672|930)+	2.7.11.25,537380,EC 2.7.11.25,ENSBTAG00000009065,ENSBTAP00000011949,ENSBTAP00000011950,ENSBTAT00000011949,ENSBTAT00000011950,F1MXH6,F1MXH6_BOVIN,MAP3K5,MAP3K5-201,Mitogen-activated protein kinase kinase kinase 5,NM_001144081,NM_001144081.2,NP_001137553,NP_001137553.2,R-BTA-2262752,R-BTA-2559580,R-BTA-2559583,R-BTA-8953897,UPI0002263C1E,XM_024996767,XM_024996767.1,XP_024852535,XP_024852535.1,bta:5…
MARCHF6	9913.ENSBTAP00000036510	Membrane associated ring-CH-type finger 6.	https://smart.embl.de/smart/DDvec.cgi?smart=910:RINGv(8|56)+TRANS(92|114)+TRANS(141|163)+TRANS(290|312)+TRANS(332|354)+TRANS(367|389)+TRANS(420|442)+TRANS(480|502)+TRANS(522|540)+TRANS(634|656)+TRANS(676|698)+TRANS(721|743)+TRANS(763|785)+TRANS(813|835)+TRANS(850|867)+	2.3.2.27,540371,E3 ubiquitin-protein ligase MARCH6,EC 2.3.2.27,ENSBTAG00000003536,ENSBTAP00000004598,ENSBTAP00000036510,ENSBTAT00000004598,ENSBTAT00000036654,F1MHF0,F1MHF0_BOVIN,MARCH6,MARCHF6,MARCHF6-201,Membrane associated ring-CH-type finger 6,NM_001205812,NM_001205812.1,NM_001205812.2,NP_001192741,NP_001192741.1,UPI0000F316D8,XM_024981357,XM_024981357.1,XM_024981358,XM_024981358.1,XP_02483712…
MAST1	9913.ENSBTAP00000007991	Microtubule associated serine/threonine kinase 1.	https://smart.embl.de/smart/DDvec.cgi?smart=1572:Pfam_DUF1908(61|337)+S_TKc(374|647)+S_TK_X(648|708)+PDZ(973|1053)+	2.7.11.1,539825,E1BK33,E1BK33_BOVIN,EC 2.7.11.1,ENSBTAG00000006080,ENSBTAP00000007991,ENSBTAP00000027252,ENSBTAT00000007991,ENSBTAT00000027252,MAST1,MAST1-201,Microtubule associated serine/threonine kinase 1,Microtubule-associated serine/threonine kinase,NM_001191528,NM_001191528.1,NP_001178457,NP_001178457.1,UPI000209A894,XM_024994513,XM_024994513.1,XP_024850281,XP_024850281.1,bta:539825
MDC1	9913.ENSBTAP00000035767	Mediator of DNA damage checkpoint 1.	https://smart.embl.de/smart/DDvec.cgi?smart=1671:FHA(54|106)+Pfam_RTT107_BRCT_5(1458|1552)+	E1BI26,E1BI26_BOVIN,ENSBTAG00000025526,ENSBTAP00000035767,ENSBTAT00000035900,MDC1,MDC1-201,Mediator of DNA damage checkpoint 1,R-BTA-1640170,R-BTA-2990846,R-BTA-3108214,R-BTA-3108232,R-BTA-392499,R-BTA-5693532,R-BTA-5693565,R-BTA-5693571,R-BTA-5693606,R-BTA-597592,R-BTA-69473,R-BTA-69481,R-BTA-69620,R-BTA-73894,UPI000D538F0E,XM_024984121,XM_024984121.1,XM_024984122,XM_024984122.1,XM_024984123,XM_…
METTL16	9913.ENSBTAP00000035031	Methyltransferase like 16.	https://smart.embl.de/smart/DDvec.cgi?smart=643:Pfam_MTS(174|282)+	2.1.1.346,509278,E1BCU7,E1BCU7_BOVIN,EC 2.1.1.346,ENSBTAG00000017440,ENSBTAP00000023185,ENSBTAP00000035031,ENSBTAT00000023185,ENSBTAT00000035153,METTL16,METTL16-201,Methyltransferase like 16,Methyltransferase-like protein 16,NM_001192216,NM_001192216.1,NP_001179145,NP_001179145.1,U6 snRNA m6A methyltransferase,UPI000FC4B620,XR_813155,XR_813155.3,bta:509278
MFN2	9913.ENSBTAP00000070841	Mitofusin 2; Belongs to the TRAFAC class dynamin-like GTPase superfamily. Dynamin/Fzo/YdjA family.	https://smart.embl.de/smart/DDvec.cgi?smart=757:Pfam_Dynamin_N(99|259)+Pfam_Fzo_mitofusin(594|754)+	3.6.5.-,534574,CBM40461.1,D7GLD0,D7GLD0_BOVIN,E1BKT8,EC 3.6.5.-,ENSBTAG00000005314,ENSBTAP00000006991,ENSBTAP00000043671,ENSBTAP00000070841,ENSBTAT00000006991,ENSBTAT00000046364,ENSBTAT00000080672,FN868562,MFN2,MFN2-201,MFN2-202,Mitofusin 2,Mitofusin-2,NM_001190269,NM_001190269.1,NM_001190270,NM_001190270.1,NP_001177198,NP_001177198.1,NP_001177199,NP_001177199.1,R-BTA-109582,R-BTA-1632852,R-BTA-5…
MGC137211	9913.ENSBTAP00000024695	Protein HP-25 homolog 2.	https://smart.embl.de/smart/DDvec.cgi?smart=215:SIGNAL(1|30)+C1Q(80|212)+	511239,AAI12509.1,ACV32360.1,BC112508,ENSBTAG00000018556,ENSBTAP00000024695,ENSBTAP00000037831,ENSBTAT00000024695,ENSBTAT00000038012,FJ645736,HP252_BOVIN,MGC137211,MGC137211-201,NM_001046079,NM_001046079.1,NP_001039544,NP_001039544.1,Protein HP-25 homolog 2,Protein HP-25 homolog 2 precursor,Q2KIU3,UPI00004F1C7F,bta:511239
MICAL2	9913.ENSBTAP00000058159	[F-actin]-monooxygenase MICAL2; Nuclear monooxygenase that promotes depolymerization of F- actin by mediating oxidation of specific methionine residues on actin to form methionine-sulfoxide, resulting in actin filament disassembly and preventing repolymerization (By similarity). In the absence of actin, it also functions as a NADPH oxidase producing H(2)O(2) (By similarity). Acts as a key regulat…	https://smart.embl.de/smart/DDvec.cgi?smart=1865:Pfam_FAD_binding_2(88|126)+CH(518|617)+LIM(978|1032)+DUF3585(1795|1865)+	1.14.13.225,534041,A0A3Q1LSU4,A0A3Q1M4Q9,A0A3Q1MTT2,DAAA02040675,DAAA02040676,DAAA02040677,DAAA02040678,DAAA02040679,EC 1.14.13.225,ENSBTAG00000014855,ENSBTAP00000010779,ENSBTAP00000019784,ENSBTAP00000043575,ENSBTAP00000054788,ENSBTAP00000056040,ENSBTAP00000058126,ENSBTAP00000058159,ENSBTAP00000064808,ENSBTAT00000010779,ENSBTAT00000019784,ENSBTAT00000046258,ENSBTAT00000063100,ENSBTAT00000064901,E…
MMP11	9913.ENSBTAP00000008025	Matrix metallopeptidase 11.	https://smart.embl.de/smart/DDvec.cgi?smart=491:SIGNAL(1|33)+ZnMc(104|262)+HX(301|344)+HX(346|387)+HX(390|437)+HX(439|483)+	3.4.24.-,539109,EC 3.4.24.-,ENSBTAG00000006108,ENSBTAP00000008025,ENSBTAT00000008025,F1MMD4,F1MMD4_BOVIN,MMP11,MMP11-201,Matrix metallopeptidase 11,Matrix metalloproteinase-11 (stromelysin 3),R-BTA-1442490,R-BTA-1474228,R-BTA-1474244,R-BTA-1592389,Stromelysin-3,UPI000D53ABF1,XM_024977850,XM_024977850.1,XP_024833618,XP_024833618.1,bta:539109
MRPL3	9913.ENSBTAP00000041336	39S ribosomal protein L3, mitochondrial; Belongs to the universal ribosomal protein uL3 family.	https://smart.embl.de/smart/DDvec.cgi?smart=348:Pfam_Ribosomal_L3(1|118)+Pfam_Ribosomal_L3(112|281)+Pfam_Ribosomal_L3(278|340)+	2FTC,39S ribosomal protein L3, mitochondrial,614906,A0A3Q1MKB9,AAI03048.1,BC103047,ENSBTAG00000030942,ENSBTAP00000041336,ENSBTAP00000069664,ENSBTAT00000043792,ENSBTAT00000067478,L3mt,Large subunit ribosomal protein L3,MRP-L3,MRPL3,MRPL3-201,MRPL3-202,Mitochondrial ribosomal protein L3,NM_001080317,NM_001080317.2,NP_001073786,NP_001073786.1,Q3ZBX6,R-BTA-392499,R-BTA-5368287,R-BTA-5389840,R-BTA-541…
MRPL30	9913.ENSBTAP00000005183	39S ribosomal protein L30, mitochondrial; Belongs to the universal ribosomal protein uL30 family.	https://smart.embl.de/smart/DDvec.cgi?smart=161:Pfam_Ribosomal_L30(67|117)+	39S ribosomal protein L30, mitochondrial,614151,A0A140T852,ENSBTAG00000038949,ENSBTAP00000005183,ENSBTAP00000073024,ENSBTAT00000005183,ENSBTAT00000080971,L30mt,Large subunit ribosomal protein L30,MRP-L30,MRPL30,MRPL30-201,MRPL30-202,Mitochondrial ribosomal protein L30,NM_001035443,NM_001035443.1,NP_001030520,NP_001030520.1,Q2KI82,Q58DV5,RM30_BOVIN,UPI00005C184B,XM_005212350,XM_005212350.3,XM_0052…
MRVI1	9913.ENSBTAP00000043465	Protein MRVI1; Plays a role as NO/PRKG1-dependent regulator of IP3-induced calcium release; its phosphorylation by PRKG1 inhibits bradykinin and IP3-induced calcium release from intracellular stores. Recruits PRKG1 to the endoplasmic reticulum and may mediate the assembly of PRKG1 and ITPR1 in a macrocomplex. Involved in PRKG1 signaling cascade leading to inhibition of platelet activation and agg…	https://smart.embl.de/smart/DDvec.cgi?smart=911:Pfam_MRVI1(325|911)+	281918,A0A3Q1LJB9,A0A3Q1LZ96,A0A3Q1MFI4,A0A3Q1MGG5,A0A3Q1MJT9,ENSBTAG00000007129,ENSBTAP00000009387,ENSBTAP00000033429,ENSBTAP00000043465,ENSBTAP00000059456,ENSBTAP00000061020,ENSBTAP00000068104,ENSBTAP00000071654,ENSBTAP00000072970,ENSBTAT00000009387,ENSBTAT00000033516,ENSBTAT00000046140,ENSBTAT00000075172,ENSBTAT00000078072,ENSBTAT00000082053,ENSBTAT00000084912,ENSBTAT00000085591,F1MH42,F1MYA5,…
MSH5	9913.ENSBTAP00000026367	DNA_MISMATCH_REPAIR_2 domain-containing protein.	https://smart.embl.de/smart/DDvec.cgi?smart=832:MUTSd(246|566)+MUTSac(582|774)+	100139295,A0A3Q1M1U0,DNA mismatch repair protein MSH5,DNA_MISMATCH_REPAIR_2 domain-containing protein,E1B8D2,E1B8D2_BOVIN,ENSBTAG00000019790,ENSBTAP00000026367,ENSBTAP00000026368,ENSBTAP00000067333,ENSBTAT00000026367,ENSBTAT00000026368,ENSBTAT00000079082,MSH5,MSH5-201,MSH5-202,MutS protein homolog 5,NM_001205499,NM_001205499.1,NP_001192428,NP_001192428.1,UPI000061325D,UPI00017C38C6,XM_010818305,X…
MUC2	9913.ENSBTAP00000062426	Uncharacterized protein.	https://smart.embl.de/smart/DDvec.cgi?smart=3203:SIGNAL(1|20)+VWD(60|219)+C8(252|326)+Pfam_TIL(329|385)+VWC(387|455)+C8(600|671)+Pfam_TIL(677|734)+VWD(856|1015)+C8(1051|1125)+Pfam_Mucin2_WxxW(1312|1399)+Pfam_Mucin2_WxxW(1640|1727)+Pfam_Mucin2_WxxW(1930|2017)+VWD(2545|2713)+C8(2760|2833)+VWC(2891|2959)+VWC(3000|3064)+CT(3100|3183)+	A0A3Q1M2T0,A0A3Q1M2T0_BOVIN,ENSBTAG00000050212,ENSBTAP00000062426,ENSBTAT00000083797,MUC2,Mucin 2, oligomeric mucus/gel-forming,UPI000FC4F7B0,Uncharacterized protein,XM_024987595,XM_024987595.1,XP_024843363,XP_024843363.1
MYCBP2	9913.ENSBTAP00000025100	MYC binding protein 2.	https://smart.embl.de/smart/DDvec.cgi?smart=4553:Pfam_RCC1_2(558|587)+Pfam_RCC1(833|881)+Pfam_PHR(1110|1260)+Pfam_PHR(1601|1758)+Pfam_SH3_3(2352|2418)+APC10(3614|3772)+RING(4303|4353)+	2.3.2.33,534496,E1BH40,E1BH40_BOVIN,E3 ubiquitin-protein ligase MYCBP2,EC 2.3.2.33,ENSBTAG00000018851,ENSBTAP00000025098,ENSBTAP00000025100,ENSBTAP00000025101,ENSBTAP00000043887,ENSBTAT00000025098,ENSBTAT00000025100,ENSBTAT00000025101,ENSBTAT00000046606,MYC binding protein 2,MYCBP2,MYCBP2-201,NM_001192817,NM_001192817.2,NP_001179746,NP_001179746.2,RCR-type E3 ubiquitin transferase,UPI000FC45D22,X…
MYH3	9913.ENSBTAP00000001120	Myosin heavy chain 3; Belongs to the TRAFAC class myosin-kinesin ATPase superfamily. Myosin family.	https://smart.embl.de/smart/DDvec.cgi?smart=1940:Pfam_Myosin_N(35|74)+MYSc(80|780)+IQ(781|803)+IQ(807|829)+Pfam_Myosin_tail_1(844|1925)+	281338,A6QPA6,A6QPA6_BOVIN,AAI49228.1,BC149227,ENSBTAG00000011803,ENSBTAP00000001120,ENSBTAP00000015671,ENSBTAT00000001120,ENSBTAT00000015671,F1MTZ2,MYH3,MYH3 protein,MYH3-201,Myosin heavy chain 1/2/3/4/8/13/7B/15,Myosin heavy chain 3,Myosin-3,NM_001101835,NM_001101835.1,NP_001095305,NP_001095305.1,R-BTA-390522,R-BTA-397014,UPI00015885B3,bta:281338
MYH7	9913.ENSBTAP00000053217	Myosin-7; Myosins are actin-based motor molecules with ATPase activity essential for muscle contraction. Forms regular bipolar thick filaments that, together with actin thin filaments, constitute the fundamental contractile unit of skeletal and cardiac muscle. Belongs to the TRAFAC class myosin-kinesin ATPase superfamily. Myosin family.	https://smart.embl.de/smart/DDvec.cgi?smart=1935:Pfam_Myosin_N(34|73)+MYSc(79|779)+IQ(780|802)+Pfam_Myosin_tail_1(843|1924)+	282714,5N69,5N6A,6FSA,ENSBTAG00000009703,ENSBTAP00000007359,ENSBTAP00000012797,ENSBTAP00000012798,ENSBTAP00000012800,ENSBTAP00000053217,ENSBTAT00000007359,ENSBTAT00000012797,ENSBTAT00000012798,ENSBTAT00000012800,ENSBTAT00000061306,F1MM07,MYH7,MYH7-201,MYH7_BOVIN,MyHC-beta,MyHC-slow,Myosin heavy chain 6/7,Myosin heavy chain 7,Myosin heavy chain slow isoform,Myosin heavy chain, cardiac muscle beta …
MYO16	9913.ENSBTAP00000024275	Myosin XVI; Belongs to the TRAFAC class myosin-kinesin ATPase superfamily. Myosin family.	https://smart.embl.de/smart/DDvec.cgi?smart=1877:ANK(92|121)+ANK(125|154)+ANK(158|189)+ANK(221|250)+ANK(254|283)+MYSc(398|1146)+IQ(1146|1168)+Pfam_NYAP_N(1221|1387)+	A0A3Q1LWJ2,A0A3Q1MN36,ENSBTAG00000018237,ENSBTAP00000024275,ENSBTAP00000061607,ENSBTAP00000072632,ENSBTAT00000024275,ENSBTAT00000068307,ENSBTAT00000086502,F1MCA3,F1MCA3_BOVIN,MYO16,MYO16-201,MYO16-202,MYO16-203,Myosin XVI,UPI000FC458D2,UPI000FC4B77B,UPI000FC4D68F,XM_025000169,XM_025000169.1,XP_024855937,XP_024855937.1
MYO3B	9913.ENSBTAP00000068555	Myosin IIIB; Belongs to the TRAFAC class myosin-kinesin ATPase superfamily. Myosin family.	https://smart.embl.de/smart/DDvec.cgi?smart=1231:S_TKc(14|280)+MYSc(324|1046)+IQ(1046|1068)+IQ(1073|1095)+	A0A3Q1LLC7,A0A3Q1LNH9,A0A3Q1M4N6,A0A3Q1M4N6_BOVIN,A0A3Q1MHJ7,A0A3Q1MI57,A0A3Q1N3T6,A0A3Q1NED4,ENSBTAG00000003626,ENSBTAP00000004733,ENSBTAP00000038302,ENSBTAP00000051935,ENSBTAP00000053721,ENSBTAP00000058530,ENSBTAP00000060564,ENSBTAP00000064267,ENSBTAP00000068555,ENSBTAP00000069950,ENSBTAP00000070714,ENSBTAP00000073970,ENSBTAT00000004733,ENSBTAT00000038489,ENSBTAT00000052661,ENSBTAT00000061222,E…
MYOD1	9913.ENSBTAP00000002868	Myoblast determination protein 1; Acts as a transcriptional activator that promotes transcription of muscle-specific target genes and plays a role in muscle differentiation. Together with MYF5 and MYOG, co-occupies muscle-specific gene promoter core region during myogenesis. Induces fibroblasts to differentiate into myoblasts. Interacts with and is inhibited by the twist protein. This interaction…	https://smart.embl.de/smart/DDvec.cgi?smart=318:BASIC(1|114)+HLH(115|166)+Pfam_Myf5(191|259)+	281938,AAI20455.1,BC120454,ENSBTAG00000002216,ENSBTAP00000002868,ENSBTAT00000002868,MYOD,MYOD1,MYOD1-201,MYOD1_BOVIN,Myoblast determination protein 1,Myogenic differentiation 1,Myogenic factor 3,NM_001040478,NM_001040478.2,NP_001035568,NP_001035568.2,Q0VBX9,Q7YS82,UPI0000614404,bta:281938
MYRFL	9913.ENSBTAP00000019581	Myelin regulatory factor-like protein.	https://smart.embl.de/smart/DDvec.cgi?smart=896:Pfam_NDT80_PhoG(255|402)+Pfam_Peptidase_S74(449|508)+Pfam_MRF_C1(528|563)+Pfam_MRF_C2(754|895)+	781109,A0A3Q1MIN3,A6QNP2,AAI48935.1,BC148934,DAAA02013219,DAAA02013220,DAAA02013221,DAAA02013222,ENSBTAG00000014829,ENSBTAP00000019581,ENSBTAP00000019748,ENSBTAP00000074179,ENSBTAT00000019581,ENSBTAT00000019748,ENSBTAT00000072078,F1N4M2,MRFL_BOVIN,MYRFL,MYRFL-201,MYRFL-202,Myelin regulatory factor like,Myelin regulatory factor-like protein,NM_001102323,NM_001102323.1,NP_001095793,NP_001095793.1,U…
MYT1L	9913.ENSBTAP00000004603	Myelin transcription factor 1-like.	https://smart.embl.de/smart/DDvec.cgi?smart=1144:Pfam_zf-C2HC(30|58)+Pfam_zf-C2HC(503|530)+Pfam_zf-C2HC(547|575)+Pfam_MYT1(619|868)+Pfam_zf-C2HC(900|928)+Pfam_zf-C2HC(949|977)+Pfam_zf-C2HC(1002|1030)+	537684,A0JN68,A0JN68_BOVIN,AAI26539.1,BC126538,ENSBTAG00000003540,ENSBTAP00000004603,ENSBTAP00000004606,ENSBTAP00000038165,ENSBTAT00000004603,ENSBTAT00000004606,ENSBTAT00000038350,H9GW31,MYT1L,MYT1L-201,Myelin transcription factor 1 like,Myelin transcription factor 1-like,Myelin transcription factor 1-like protein,NM_001078012,NM_001078012.1,NP_001071480,NP_001071480.1,UPI0000E6742B,XM_024995855,…
NCKAP1	9913.ENSBTAP00000064482	NCK associated protein 1.	https://smart.embl.de/smart/DDvec.cgi?smart=1138:Pfam_Nckap1(9|1132)+	101907541,A0A3Q1M7M0,A0A3Q1M7W5,A0A3Q1M7W5_BOVIN,A0A3Q1MD87,A0A3Q1MKB2,A0A3Q1MWL3,A0A3Q1NAE3,A0A3Q1NMJ7,A0A3Q1NN69,ENSBTAG00000033662,ENSBTAP00000044947,ENSBTAP00000053174,ENSBTAP00000059894,ENSBTAP00000064482,ENSBTAP00000066386,ENSBTAP00000066797,ENSBTAP00000068218,ENSBTAP00000071291,ENSBTAP00000073832,ENSBTAP00000074152,ENSBTAT00000047777,ENSBTAT00000061010,ENSBTAT00000071320,ENSBTAT00000071616…
NDOR1	9913.ENSBTAP00000056657	NADPH-dependent diflavin oxidoreductase 1.	https://smart.embl.de/smart/DDvec.cgi?smart=667:Pfam_Flavodoxin_1(8|145)+Pfam_FAD_binding_1(201|396)+	A0A3Q1LJM5,A0A3Q1LJM5_BOVIN,ABF57319.1,BT025363,DAAA02032411,ENSBTAG00000047061,ENSBTAP00000054403,ENSBTAP00000056657,ENSBTAT00000066145,ENSBTAT00000074223,NADPH dependent diflavin oxidoreductase 1,NADPH-dependent diflavin oxidoreductase 1,NDOR1,NDOR1-201,NDOR1-202,NM_001046158,NM_001046158.2,NP_001039623,NP_001039623.2,Q1JPJ0,UPI00005BDCCF,UPI000FC49CA2,XM_005213483,XM_005213483.3,XM_015473711,X…
NDST3	9913.ENSBTAP00000009623	N-deacetylase and N-sulfotransferase 3.	https://smart.embl.de/smart/DDvec.cgi?smart=522:Pfam_HSNSD(20|506)+	2.8.2.-,3.1.1.-,524136,EC 2.8.2.-,EC 3.1.1.-,ENSBTAG00000007316,ENSBTAP00000009623,ENSBTAP00000039653,ENSBTAP00000056200,ENSBTAT00000009623,ENSBTAT00000039867,ENSBTAT00000064652,F1MXP6,F1MXP6_BOVIN,N-deacetylase and N-sulfotransferase 3,NDST3,NDST3-201,NM_001077961,NM_001077961.1,NP_001071429,NP_001071429.1,R-BTA-1430728,R-BTA-1630316,R-BTA-1638091,R-BTA-2022928,R-BTA-71387,UPI000179EBFE,bta:5241…
NDUFA12	9913.ENSBTAP00000019529	NADH dehydrogenase [ubiquinone] 1 alpha subcomplex subunit 12; Accessory subunit of the mitochondrial membrane respiratory chain NADH dehydrogenase (Complex I), that is believed not to be involved in catalysis. Complex I functions in the transfer of electrons from NADH to the respiratory chain. The immediate electron acceptor for the enzyme is believed to be ubiquinone.	https://smart.embl.de/smart/DDvec.cgi?smart=220:Pfam_NDUFA12(111|214)+	281742,5LC5,5LDW,5LDX,5O31,A0A452DIK0,CI-B17.2,CIB17.2,Complex I-B17.2,ENSBTAG00000014669,ENSBTAP00000019529,ENSBTAT00000019529,NADH-ubiquinone oxidoreductase subunit B17.2,NADH:ubiquinone oxidoreductase subunit A12,NDUAC_BOVIN,NDUFA12,NDUFA12-201,NM_174306,NM_174306.3,NP_776731,NP_776731.1,O97725,Q3T092,R-BTA-1428517,R-BTA-1430728,R-BTA-163200,R-BTA-611105,R-BTA-6799198,UPI000FC494CE,bta:281742
NEB	9913.ENSBTAP00000066336	Nebulin.	http://smart.embl.de/smart/DDvec.cgi?smart=8139:	407121,A0A3Q1LGQ8,A0A3Q1LTX9,A0A3Q1LUQ9,A0A3Q1M1R3,A0A3Q1M707,A0A3Q1MC60,A0A3Q1MC60_BOVIN,A0A3Q1MEF9,A0A3Q1MG48,ENSBTAG00000006907,ENSBTAP00000009086,ENSBTAP00000021284,ENSBTAP00000023555,ENSBTAP00000038405,ENSBTAP00000038408,ENSBTAP00000038410,ENSBTAP00000043240,ENSBTAP00000048846,ENSBTAP00000051419,ENSBTAP00000053520,ENSBTAP00000057708,ENSBTAP00000058970,ENSBTAP00000060562,ENSBTAP00000063896,EN…
NEBL	9913.ENSBTAP00000053811	Nebulette.	https://smart.embl.de/smart/DDvec.cgi?smart=1013:NEBU(30|60)+NEBU(65|95)+NEBU(102|132)+NEBU(139|169)+NEBU(173|203)+NEBU(207|237)+NEBU(246|275)+NEBU(280|309)+NEBU(314|344)+NEBU(350|380)+NEBU(386|417)+NEBU(424|454)+NEBU(461|491)+NEBU(498|528)+NEBU(535|565)+NEBU(570|600)+NEBU(601|631)+NEBU(632|662)+NEBU(663|693)+NEBU(694|724)+NEBU(725|755)+NEBU(760|790)+NEBU(796|826)+SH3(956|1013)+	517987,A0A3Q1LY04,A0A3Q1M3T9,A0A3Q1MXR2,ENSBTAG00000013339,ENSBTAP00000017741,ENSBTAP00000044746,ENSBTAP00000053811,ENSBTAP00000060461,ENSBTAP00000060598,ENSBTAP00000068202,ENSBTAT00000017741,ENSBTAT00000047546,ENSBTAT00000061339,ENSBTAT00000067562,ENSBTAT00000075769,ENSBTAT00000085898,F1MF57,F1MF57_BOVIN,NEBL,NEBL-201,NEBL-202,NEBL-203,NEBL-204,NM_001191413,NM_001191413.2,NP_001178342,NP_0011783…
NECAB2	9913.ENSBTAP00000059180	Oxidative stress induced growth inhibitor 1.	https://smart.embl.de/smart/DDvec.cgi?smart=653:EFh(296|324)+EFh(330|358)+Pfam_ABM(518|592)+	515049,A0A3Q1LIX7,A0A3Q1LIX7_BOVIN,A0A3Q1MIY2,A0A3Q1MQ75,A0A3S5ZPS7,A0A3S5ZPT4,ENSBTAG00000012508,ENSBTAP00000016606,ENSBTAP00000045654,ENSBTAP00000048496,ENSBTAP00000059180,ENSBTAP00000070706,ENSBTAP00000074133,ENSBTAT00000016606,ENSBTAT00000048657,ENSBTAT00000055672,ENSBTAT00000068373,ENSBTAT00000074928,ENSBTAT00000077499,N-terminal EF-hand calcium-binding protein 2,NECAB2,NM_001077129,NM_00107…
NECTIN1	9913.ENSBTAP00000053311	Nectin cell adhesion molecule 1.	https://smart.embl.de/smart/DDvec.cgi?smart=515:SIGNAL(1|30)+IGv(46|126)+Pfam_C2-set_2(148|236)+IG(254|334)+TRANS(356|378)+	533492,A0A3Q1LI53,ENSBTAG00000015939,ENSBTAP00000021197,ENSBTAP00000044788,ENSBTAP00000053311,ENSBTAP00000058611,ENSBTAT00000021197,ENSBTAT00000047595,ENSBTAT00000061522,ENSBTAT00000085395,F1MQJ3,F1MQJ3_BOVIN,NECTIN1,NECTIN1-201,NECTIN1-202,NM_001206022,NM_001206022.1,NM_001206022.2,NP_001192951,NP_001192951.1,Nectin cell adhesion molecule 1,PVRL1,Poliovirus receptor-related protein 1,Poliovirus …
NEDD4L	9913.ENSBTAP00000067434	NEDD4 like E3 ubiquitin protein ligase.	https://smart.embl.de/smart/DDvec.cgi?smart=1255:WW(456|488)+WW(648|680)+WW(760|792)+WW(811|861)+HECTc(918|1254)+	2.3.2.26,510003,A0A3Q1LFY0,A0A3Q1M231,A0A3Q1M231_BOVIN,A0A3Q1MH88,A0A3Q1MHU5,A0A3Q1MJ08,E3 ubiquitin-protein ligase NEDD4-like,EC 2.3.2.26,ENSBTAG00000005412,ENSBTAP00000007120,ENSBTAP00000007121,ENSBTAP00000007128,ENSBTAP00000007136,ENSBTAP00000018334,ENSBTAP00000036702,ENSBTAP00000036703,ENSBTAP00000036704,ENSBTAP00000057192,ENSBTAP00000067434,ENSBTAP00000068427,ENSBTAP00000071305,ENSBTAP000000…
NFX1	9913.ENSBTAP00000042616	Transcriptional repressor NF-X1; Binds to the X-box motif of MHC class II genes and represses their expression. May play an important role in regulating the duration of an inflammatory response by limiting the period in which MHC class II molecules are induced by interferon-gamma. Together with PABPC1 or PABPC4, acts as a coactivator for TERT expression. Mediates E2- dependent ubiquitination (By …	https://smart.embl.de/smart/DDvec.cgi?smart=1116:RING(355|405)+ZnF_NFX(450|468)+ZnF_NFX(503|522)+ZnF_NFX(564|583)+ZnF_NFX(629|652)+ZnF_NFX(691|710)+ZnF_NFX(718|737)+ZnF_NFX(775|794)+ZnF_NFX(829|851)+ZnF_NFX(860|881)+R3H(980|1058)+	2.3.2.-,515680,A6QLA0,AAI47891.1,BC147890,ENSBTAG00000012385,ENSBTAP00000016436,ENSBTAP00000042613,ENSBTAP00000042616,ENSBTAT00000016436,ENSBTAT00000045203,ENSBTAT00000045206,NFX1,NFX1-201,NFX1_BOVIN,NM_001102029,NM_001102029.2,NP_001095499,NP_001095499.1,Nuclear transcription factor, X-box binding 1,Transcriptional repressor NF-X1,UPI0001588494,XM_005210324,XM_005210324.4,XM_005210325,XM_0052103…
NNT	9913.ENSBTAP00000072815	NAD(P) transhydrogenase, mitochondrial; The transhydrogenation between NADH and NADP is coupled to respiration and ATP hydrolysis and functions as a proton pump across the membrane (By similarity). May play a role in reactive oxygen species (ROS) detoxification in the adrenal gland (By similarity). In the N-terminal section; belongs to the AlaDH/PNT family.	https://smart.embl.de/smart/DDvec.cgi?smart=1086:AlaDh_PNT_N(60|199)+AlaDh_PNT_C(208|372)+TRANS(476|498)+Pfam_PNTB_4TM(501|587)+TRANS(595|617)+Pfam_PNTB(620|1079)+	1.6.1.2,1D4O,280878,7.1.1.1,A4FUB4,AAA21440.1,AAA30660.1,AAA30717.1,AAI14661.1,BC114660,EC 1.6.1.2,EC 7.1.1.1,ENSBTAG00000011885,ENSBTAP00000015769,ENSBTAP00000049955,ENSBTAP00000072815,ENSBTAT00000015769,ENSBTAT00000055054,ENSBTAT00000080867,H+-translocating NAD(P) transhydrogenase,J03534,L02543,M22754,NAD(P) transhydrogenase, mitochondrial,NAD(P) transhydrogenase, mitochondrial precursor,NM_173…
NPHP1	9913.ENSBTAP00000010098	Nephrocystin 1.	https://smart.embl.de/smart/DDvec.cgi?smart=686:SH3(166|222)+	505421,A0A3Q1MI92,A7YWF3,A7YWF3_BOVIN,AAI34537.1,BC134536,ENSBTAG00000007675,ENSBTAP00000010098,ENSBTAP00000010099,ENSBTAP00000068869,ENSBTAT00000010098,ENSBTAT00000010099,ENSBTAT00000082104,NM_001105332,NM_001105332.1,NPHP1,NPHP1 protein,NPHP1-201,NPHP1-202,NP_001098802,NP_001098802.1,Nephrocystin 1,Nephrocystin-1,R-BTA-1852241,R-BTA-5617833,R-BTA-5620912,UPI00015C705A,UPI000FC4CC86,XM_005212296…
NPY2R	9913.ENSBTAP00000022125	Neuropeptide Y receptor type 2; Receptor for neuropeptide Y and peptide YY; Belongs to the G-protein coupled receptor 1 family.	https://smart.embl.de/smart/DDvec.cgi?smart=384:Pfam_7tm_1(70|328)+	281943,AAI51291.1,B1H0W3,BC151290,ENSBTAG00000016633,ENSBTAP00000022125,ENSBTAT00000022125,NM_174401,NM_174401.2,NPY-Y2 receptor,NPY2-R,NPY2R,NPY2R-201,NPY2R_BOVIN,NP_776826,NP_776826.1,Neuropeptide Y receptor Y2,Neuropeptide Y receptor type 2,P79113,R-BTA-162582,R-BTA-372790,R-BTA-373076,R-BTA-375276,R-BTA-388396,R-BTA-418594,R-BTA-500792,UPI00006137A5,XM_005217432,XM_005217432.2,XM_024977007,XM…
NRM	9913.ENSBTAP00000035763	Nurim; Belongs to the nurim family.	https://smart.embl.de/smart/DDvec.cgi?smart=262:TRANS(5|27)+Pfam_NnrU(67|210)+	511167,AAI09507.1,BC109506,ENSBTAG00000006966,ENSBTAP00000009154,ENSBTAP00000035763,ENSBTAT00000009154,ENSBTAT00000035896,NM_001037596,NM_001037596.2,NP_001032685,NP_001032685.1,NRM,NRM-201,NRM_BOVIN,Nuclear envelope membrane protein,Nuclear rim protein,Nurim,Q32LM8,UPI00005BFB62,bta:511167
NRXN1	9913.ENSBTAP00000053469	Neurexin-1; Cell surface protein involved in cell-cell-interactions, exocytosis of secretory granules and regulation of signal transmission. Function is isoform-specific. Alpha-type isoforms have a long N- terminus with six laminin G-like domains and play an important role in synaptic signal transmission. Alpha-type isoforms play a role in the regulation of calcium channel activity and Ca(2+)-tri…	https://smart.embl.de/smart/DDvec.cgi?smart=852:LamG(36|170)+LamG(224|376)+EGF(403|437)+LamG(462|592)+LamG(640|776)+EGF(810|844)+	281950,2H0B,2R16,3ASI,3POY,3QCW,3R05,6CW1,ENSBTAG00000024021,ENSBTAP00000026956,ENSBTAP00000033006,ENSBTAP00000044872,ENSBTAP00000053469,ENSBTAT00000026956,ENSBTAT00000033082,ENSBTAT00000047691,ENSBTAT00000061495,F1MMZ4,NM_174404.2,NP_776829,NP_776829.1,NRX1A_BOVIN,NRXN1,NRXN1-201,Neurexin,Neurexin 1,Neurexin I-alpha,Neurexin-1,Neurexin-1 isoform 1 precursor,Neurexin-1-alpha,Q28146,R-BTA-112316,R…
NRXN1-2	9913.ENSBTAP00000044872	Neurexin-1-beta; Neuronal cell surface protein that may be involved in cell recognition and cell adhesion by forming intracellular junctions through binding to neuroligins. May play a role in formation or maintenance of synaptic junctions. May mediate intracellular signaling. May play a role in angiogenesis (By similarity).	https://smart.embl.de/smart/DDvec.cgi?smart=437:TRANS(26|48)+LamG(108|235)+4.1m(382|400)+	281950,3VKF,ENSBTAG00000046199,ENSBTAP00000044872,ENSBTAP00000053932,ENSBTAT00000047691,ENSBTAT00000064537,F1MN62,G3MWM9,NM_001109805,NM_001109805.2,NP_001103275,NP_001103275.1,NRX1B_BOVIN,NRXN1,NRXN1-2,NRXN1-201,NRXN1-202,Neurexin 1,Neurexin I-beta,Neurexin-1-beta,Q28142,R-BTA-112316,R-BTA-6794361,R-BTA-6794362,UPI000057FE7F,UPI0002C35849,XM_024998305,XM_024998305.1,XM_024998306,XM_024998306.1,X…
NUCB1	9913.ENSBTAP00000003073	Nucleobindin-1; Major calcium-binding protein of the Golgi which may have a role in calcium homeostasis. Acts as a non-receptor guanine nucleotide exchange factor which binds to and activates alpha subunits of guanine nucleotide-binding proteins (G proteins) (By similarity); Belongs to the nucleobindin family.	https://smart.embl.de/smart/DDvec.cgi?smart=457:SIGNAL(1|24)+Pfam_EF-hand_7(242|319)+	505351,A0A452DHZ5,ENSBTAG00000002378,ENSBTAP00000003073,ENSBTAT00000003073,NM_001075199,NM_001075199.1,NP_001068667,NP_001068667.1,NUCB1,NUCB1-201,NUCB1_BOVIN,Nucleobindin,Nucleobindin 1,Nucleobindin-1,Nucleobindin-1 precursor,Q0P569,R-BTA-381426,R-BTA-392499,R-BTA-597592,R-BTA-8957275,UPI00005BED9A,XM_005219190,XM_005219190.4,XM_010815007.1,XM_024978019,XM_024978019.1,XP_005219247,XP_005219247.1…
OC90	9913.ENSBTAP00000037179	Uncharacterized protein.	https://smart.embl.de/smart/DDvec.cgi?smart=489:SIGNAL(1|17)+PA2c(75|191)+PA2c(320|432)+	516393,E1BG04,E1BG04_BOVIN,ENSBTAG00000007736,ENSBTAP00000010175,ENSBTAP00000037179,ENSBTAT00000010175,ENSBTAT00000037345,OC90,Otoconin 90,Otoconin-90,UPI000383D1C2,Uncharacterized protein,XM_002692609,XM_002692609.5,XM_002692609.6,XM_003583029.4,XP_002692655,XP_002692655.3,XP_003583077.2,bta:516393
ODF3	9913.ENSBTAP00000065886	Outer dense fiber protein 3; Outer dense fibers are filamentous structures located on the outside of the axoneme in the midpiece and principal piece of the mammalian sperm tail. May help to maintain the passive elastic structures and elastic recoil of the sperm tail; Belongs to the ODF3 family.	https://smart.embl.de/smart/DDvec.cgi?smart=262:Pfam_SHIPPO-rpt(100|132)+Pfam_SHIPPO-rpt(223|253)+	509757,A0A3Q1LYN4,ENSBTAG00000001730,ENSBTAP00000002271,ENSBTAP00000065886,ENSBTAT00000002271,ENSBTAT00000073974,G3X6A7,NM_001080252,NM_001080252.2,NP_001073721,NP_001073721.1,ODF3,ODF3-201,ODF3-202,ODF3A_BOVIN,Outer dense fiber of sperm tails 3,Outer dense fiber of sperm tails protein 3,Outer dense fiber protein 3,Q2TBH0,UPI00004F2719,UPI000FC46FE1,XM_024998482,XM_024998482.1,XP_024854250,XP_024…
OR10K1	9913.ENSBTAP00000050799	G_PROTEIN_RECEP_F1_2 domain-containing protein.	https://smart.embl.de/smart/DDvec.cgi?smart=315:Pfam_7tm_1(41|290)+	515038,ENSBTAG00000049967,ENSBTAP00000050799,ENSBTAT00000055528,G5E6C7,G5E6C7_BOVIN,G_PROTEIN_RECEP_F1_2 domain-containing protein,OR10K1,Olfactory receptor,Olfactory receptor 10K1,R-BTA-162582,R-BTA-372790,R-BTA-381753,R-BTA-388396,R-BTA-418555,UPI000FC48168,XM_002685923,XM_002685923.1,XP_002685969,XP_002685969.1,bta:515038
OR51M1	9913.ENSBTAP00000026051	Olfactory receptor family 51 subfamily M member 1.	https://smart.embl.de/smart/DDvec.cgi?smart=320:TRANS(7|29)+Pfam_7TM_GPCR_Srsx(47|319)+	617878,ENSBTAG00000019549,ENSBTAP00000026051,ENSBTAT00000026051,F1N630,F1N630_BOVIN,LOC617878,OR51M1,OR51M1-201,Olfactory receptor,Olfactory receptor 51M1,R-BTA-162582,R-BTA-372790,R-BTA-381753,R-BTA-388396,R-BTA-418555,UPI00005BE412,XM_002693276,XM_002693276.1,XM_002693276.2,XM_002707695,XM_002707695.2,XM_870208.3,XP_002693322,XP_002693322.1,XP_002707741,XP_002707741.2,XP_875301.3,bta:617878
OR7E24	9913.ENSBTAP00000004091	Olfactory receptor.	https://smart.embl.de/smart/DDvec.cgi?smart=326:Pfam_7tm_1(58|307)+	787445,ENSBTAG00000047799,ENSBTAP00000004091,ENSBTAT00000004091,F1MY99,F1MY99_BOVIN,OR7E24,Olfactory receptor,Olfactory receptor 18,UPI0000614704,XM_015471966,XM_015471966.1,XP_015327452,XP_015327452.1,bta:787445
ORM1	9913.ENSBTAP00000022991	Alpha-1-acid glycoprotein; Functions as transport protein in the blood stream. Binds various ligands in the interior of its beta-barrel domain (By similarity). Appears to function in modulating the activity of the immune system during the acute-phase reaction (By similarity).	https://smart.embl.de/smart/DDvec.cgi?smart=202:SIGNAL(1|18)+Pfam_Lipocalin(41|181)+	497200,A0A3Q1LS55,A1AG_BOVIN,ABX09992.1,AGP,AJ844606,AM403243,Alpha-1-acid glycoprotein,Alpha-1-acid glycoprotein precursor,CAH59718.2,CAL48251.2,ENSBTAG00000017294,ENSBTAP00000022991,ENSBTAP00000048386,ENSBTAP00000060052,ENSBTAT00000022991,ENSBTAT00000053971,ENSBTAT00000078470,EU250279,NM_001040502,NM_001040502.2,NP_001035592,NP_001035592.1,OMD,ORM1,ORM1-201,ORM1-202,Orosomucoid,Orosomucoid 1,Q3…
OSBPL7	9913.ENSBTAP00000017982	Oxysterol-binding protein; Belongs to the OSBP family.	https://smart.embl.de/smart/DDvec.cgi?smart=845:PH(48|144)+Pfam_Oxysterol_BP(481|829)+	508936,E1BBD8,E1BBD8_BOVIN,ENSBTAG00000013523,ENSBTAP00000017982,ENSBTAP00000034781,ENSBTAT00000017982,ENSBTAT00000034897,NM_001205647,NM_001205647.1,NP_001192576,NP_001192576.1,OSBPL7,OSBPL7-201,Oxysterol binding protein like 7,Oxysterol-binding protein,Oxysterol-binding protein-related protein 3/6/7,Oxysterol-binding protein-related protein 7,R-BTA-1430728,R-BTA-192105,R-BTA-194068,R-BTA-556833…
PARD3B	9913.ENSBTAP00000013618	Par-3 family cell polarity regulator beta.	https://smart.embl.de/smart/DDvec.cgi?smart=903:PDZ(137|217)+PDZ(317|396)+PDZ(433|518)+	535378,A0A3Q1M429,A0A3Q1M519,ENSBTAG00000010293,ENSBTAP00000013596,ENSBTAP00000013599,ENSBTAP00000013618,ENSBTAP00000048834,ENSBTAP00000053299,ENSBTAP00000062979,ENSBTAP00000064941,ENSBTAT00000013596,ENSBTAT00000013599,ENSBTAT00000013618,ENSBTAT00000056466,ENSBTAT00000061273,ENSBTAT00000068323,ENSBTAT00000085442,F1MI33,F1MI33_BOVIN,PARD3B,PARD3B-201,PARD3B-202,PARD3B-203,Par-3 family cell polarit…
PARP11	9913.ENSBTAP00000046585	Poly [ADP-ribose] polymerase.	https://smart.embl.de/smart/DDvec.cgi?smart=420:Pfam_WWE(92|188)+Pfam_PARP(229|420)+	2.4.2.-,2.4.2.30,539763,A0A3Q1MRM6,EC 2.4.2.30,ENSBTAG00000000275,ENSBTAP00000000342,ENSBTAP00000037550,ENSBTAP00000046585,ENSBTAP00000072514,ENSBTAT00000000342,ENSBTAT00000037726,ENSBTAT00000049732,ENSBTAT00000068193,F6RS94,F6RS94_BOVIN,NM_001082452,NM_001082452.2,NP_001075921,NP_001075921.2,PARP,PARP11,PARP11-201,PARP11-202,Poly [ADP-ribose] polymerase,Poly [ADP-ribose] polymerase 11,Poly [ADP-…
PCDH1	9913.ENSBTAP00000062959	Protocadherin 1.	https://smart.embl.de/smart/DDvec.cgi?smart=1215:SIGNAL(1|35)+Pfam_Cadherin_2(37|120)+CA(168|256)+CA(280|363)+CA(395|482)+CA(506|588)+CA(612|691)+CA(717|798)+TRANS(830|852)+	509388,A0A3Q1M024,A0A3Q1M024_BOVIN,ENSBTAG00000012518,ENSBTAP00000016618,ENSBTAP00000016619,ENSBTAP00000062959,ENSBTAT00000016618,ENSBTAT00000016619,ENSBTAT00000083691,F6Q0C0,NM_001083655,NM_001083655.1,NP_001077124,NP_001077124.1,PCDH1,PCDH1-201,PCDH1-202,Protocadherin 1,Protocadherin delta 1,Protocadherin-1,UPI0003C02E88,UPI000FC4A2BC,XM_024994061,XM_024994061.1,XM_024994062,XM_024994062.1,XM_0…
PCDH15	9913.ENSBTAP00000071726	Protocadherin related 15.	https://smart.embl.de/smart/DDvec.cgi?smart=1885:SIGNAL(1|26)+CA(69|150)+CA(179|268)+CA(309|398)+CA(431|512)+CA(536|618)+CA(619|697)+CA(721|799)+CA(823|906)+CA(930|1016)+CA(1037|1124)+CA(1148|1232)+TRANS(1359|1381)+	100140108,A0A3Q1LQG9,A0A3Q1LY24,A0A3Q1M761,A0A3Q1M793,A0A3Q1MFQ3,A0A3Q1MHY6,A0A3Q1MIC6,A0A3Q1MLP5,A0A3Q1MPW6,A0A3Q1MPW6_BOVIN,ENSBTAG00000045905,ENSBTAP00000054566,ENSBTAP00000057214,ENSBTAP00000064240,ENSBTAP00000065667,ENSBTAP00000065914,ENSBTAP00000070463,ENSBTAP00000070843,ENSBTAP00000071726,ENSBTAP00000071962,ENSBTAP00000073047,ENSBTAT00000064432,ENSBTAT00000066450,ENSBTAT00000068052,ENSBTAT…
PDE11A	9913.ENSBTAP00000021805	Phosphodiesterase.	https://smart.embl.de/smart/DDvec.cgi?smart=926:GAF(209|372)+GAF(394|560)+HDc(653|822)+	3.1.4.-,3.1.4.17,3.1.4.35,524446,E1BPD8,E1BPD8_BOVIN,EC 3.1.4.17,EC 3.1.4.35,ENSBTAG00000016396,ENSBTAP00000021802,ENSBTAP00000021805,ENSBTAP00000031831,ENSBTAT00000021802,ENSBTAT00000021805,ENSBTAT00000031885,NM_001205422,NM_001205422.1,NP_001192351,NP_001192351.1,PDE11A,PDE11A-201,Phosphodiesterase,Phosphodiesterase 11A,R-BTA-109582,R-BTA-162582,R-BTA-372790,R-BTA-388396,R-BTA-392154,R-BTA-4183…
PDE5A	9913.ENSBTAP00000014479	cGMP-specific 3',5'-cyclic phosphodiesterase; Plays a role in signal transduction by regulating the intracellular concentration of cyclic nucleotides. This phosphodiesterase catalyzes the specific hydrolysis of cGMP to 5'-GMP. Specifically regulates nitric-oxide-generated cGMP (By similarity).	https://smart.embl.de/smart/DDvec.cgi?smart=865:GAF(154|314)+GAF(336|503)+HDc(600|768)+	1FL4,281972,3.1.4.35,3JAB,3JBQ,A0A3Q1MI00,A0A3Q1MRK8,AAB00990.1,CGB-PDE,CGMP-specific 3',5'-cyclic phosphodiesterase,CHEMBL3478,EC 3.1.4.35,ENSBTAG00000024888,ENSBTAP00000014479,ENSBTAP00000053546,ENSBTAP00000068751,ENSBTAP00000074440,ENSBTAT00000014479,ENSBTAT00000061621,ENSBTAT00000075252,ENSBTAT00000076917,L16545,NM_174417,NM_174417.2,NP_776842,NP_776842.1,PDE5,PDE5A,PDE5A-201,PDE5A-202,PDE5A-…
PDGFRB	9913.ENSBTAP00000064374	Platelet-derived growth factor receptor beta; Tyrosine-protein kinase that acts as cell-surface receptor for homodimeric PDGFB and PDGFD and for heterodimers formed by PDGFA and PDGFB, and plays an essential role in the regulation of embryonic development, cell proliferation, survival, differentiation, chemotaxis and migration. Plays an essential role in blood vessel development by promoting prol…	https://smart.embl.de/smart/DDvec.cgi?smart=1107:IG(43|123)+IGc2(230|301)+IG(326|417)+TRANS(537|559)+TyrKc(603|961)+	2.7.10.1,527165,A0A3Q1N3Z8,A0A3Q1N3Z8_BOVIN,Beta platelet-derived growth factor receptor,EC 2.7.10.1,ENSBTAG00000002804,ENSBTAP00000003631,ENSBTAP00000050274,ENSBTAP00000053664,ENSBTAP00000064374,ENSBTAT00000003631,ENSBTAT00000055803,ENSBTAT00000061140,ENSBTAT00000086976,F1N759,NM_001075896,NM_001075896.2,NP_001069364,NP_001069364.2,PDGF-R-beta,PDGFR-beta,PDGFRB,PDGFRB-201,PDGFRB-202,Platelet der…
PFAS	9913.ENSBTAP00000042131	Phosphoribosylformylglycinamidine synthase.	https://smart.embl.de/smart/DDvec.cgi?smart=1367:Pfam_AIRS_C(473|632)+Pfam_AIRS_C(883|1018)+GATase_5(1091|1362)+	520318,6.3.5.3,A0A3Q1M913,EC 6.3.5.3,ENSBTAG00000031509,ENSBTAP00000042131,ENSBTAP00000066978,ENSBTAT00000044654,ENSBTAT00000077329,F1N4K1,F1N4K1_BOVIN,NM_001256564,NM_001256564.1,NP_001243493,NP_001243493.1,PFAS,PFAS-201,PFAS-202,Phosphoribosylformylglycinamidine synthase,R-BTA-1430728,R-BTA-15869,R-BTA-73817,R-BTA-8956320,UPI000D534BB4,UPI000D5378EF,XM_005220359,XM_005220359.4,XM_015458726,XM_0…
PI4KA	9913.ENSBTAP00000018572	Phosphatidylinositol 4-kinase alpha; Acts on phosphatidylinositol (PtdIns) in the first committed step in the production of the second messenger inositol-1,4,5,- trisphosphate.	https://smart.embl.de/smart/DDvec.cgi?smart=2103:PI3Ka(1542|1730)+PI3Kc(1847|2100)+	2.7.1.67,282309,A0A140T888,A0A3Q1M2C3,A0A3Q1MNL7,EC 2.7.1.67,ENSBTAG00000013971,ENSBTAP00000018572,ENSBTAP00000041325,ENSBTAP00000063923,ENSBTAP00000073513,ENSBTAT00000018572,ENSBTAT00000043781,ENSBTAT00000068125,ENSBTAT00000071533,F1MLV0,NM_174577,NM_174577.2,NP_777002,NP_777002.1,O02811,PI4-kinase alpha,PI4K-alpha,PI4KA,PI4KA-201,PI4KA-202,PI4KA-203,PI4KA_BOVIN,PIK4CA,Phosphatidylinositol 4-kin…
PIGR	9913.ENSBTAP00000026377	Polymeric immunoglobulin receptor; This receptor binds polymeric IgA and IgM at the basolateral surface of epithelial cells. The complex is then transported across the cell to be secreted at the apical surface. During this process a cleavage occurs that separates the extracellular (known as the secretory component) from the transmembrane segment.	https://smart.embl.de/smart/DDvec.cgi?smart=757:SIGNAL(1|18)+IG(25|128)+IG(137|238)+IG(242|346)+IG(355|457)+IG(466|560)+TRANS(631|653)+	281401,ENSBTAG00000019798,ENSBTAP00000026377,ENSBTAP00000050920,ENSBTAP00000056364,ENSBTAT00000026377,ENSBTAT00000054718,ENSBTAT00000063804,F1MR22,G5E6M1,NM_174143,NM_174143.1,NP_776568,NP_776568.1,P81265,PIGR,PIGR-201,PIGR-202,PIGR-203,PIGR_BOVIN,PIgR,Poly-Ig receptor,Polymeric immunoglobulin receptor,Polymeric immunoglobulin receptor precursor,Secretory component,UPI000FC4A607,UPI000FC4C9FF,bta…
PIK3C3	9913.ENSBTAP00000057256	Phosphatidylinositol 3-kinase catalytic subunit type 3.	https://smart.embl.de/smart/DDvec.cgi?smart=895:PI3K_C2(21|130)+PI3Ka(283|530)+PI3Kc(632|884)+	2.7.1.137,534815,A0A3Q1LQK4,A0A3Q1LQK4_BOVIN,A0A3Q1LRL1,A0A3Q1MA17,EC 2.7.1.137,ENSBTAG00000026290,ENSBTAP00000037130,ENSBTAP00000057256,ENSBTAP00000059796,ENSBTAP00000067430,ENSBTAT00000037295,ENSBTAT00000067289,ENSBTAT00000071254,ENSBTAT00000077983,F1MTL5,NM_001099067,NM_001099067.1,NP_001092537,NP_001092537.1,PIK3C3,PIK3C3-201,PIK3C3-202,PIK3C3-203,PIK3C3-204,Phosphatidylinositol 3-kinase,R-BT…
PISD	9913.ENSBTAP00000057263	Proline rich 14 like.	https://smart.embl.de/smart/DDvec.cgi?smart=2180:Pfam_Tantalus(1995|2031)+	787908,A0A3Q1MEZ0,A0A3Q1MS50,A0A3Q1MS50_BOVIN,A0A3Q1NF54,A8E4Q4,AAI51508.1,AAX46472.1,BC151507,BT021625,E1BG88,ENSBTAG00000009006,ENSBTAP00000011848,ENSBTAP00000011854,ENSBTAP00000011858,ENSBTAP00000048647,ENSBTAP00000057263,ENSBTAP00000070303,ENSBTAP00000072737,ENSBTAT00000011848,ENSBTAT00000011854,ENSBTAT00000011858,ENSBTAT00000056443,ENSBTAT00000066941,ENSBTAT00000074912,ENSBTAT00000086309,NM_…
PLIN5	9913.ENSBTAP00000051478	Perilipin-5; Lipid droplet-associated protein that maintains the balance between lipogenesis and lipolysis and also regulates fatty acid oxidation in oxidative tissues. Recruits mitochondria to the surface of lipid droplets and is involved in lipid droplet homeostasis by regulating both the storage of fatty acids in the form of triglycerides and the release of fatty acids for mitochondrial fatty …	https://smart.embl.de/smart/DDvec.cgi?smart=456:Pfam_Perilipin(16|370)+	531199,A6QLL0,AAI48003.1,BC148002,ENSBTAG00000038464,ENSBTAP00000051478,ENSBTAT00000054581,LSDP5,Lipid storage droplet protein 5,NM_001101136,NM_001101136.1,NP_001094606,NP_001094606.1,PLIN5,PLIN5-201,PLIN5_BOVIN,Perilipin 5,Perilipin-5,UPI0000EBCC3E,bta:531199
PPM1B	9913.ENSBTAP00000043518	Protein phosphatase 1B; Enzyme with a broad specificity. Dephosphorylates PRKAA1 and PRKAA2. Inhibits TBK1-mediated antiviral signaling by dephosphorylating it at 'Ser-172'. Plays an important role in the termination of TNF- alpha-mediated NF-kappa-B activation through dephosphorylating and inactivating IKBKB/IKKB (By similarity).	https://smart.embl.de/smart/DDvec.cgi?smart=484:PP2C_SIG(41|295)+	281995,3.1.3.16,AAI11236.1,AJ005458,BC111235,CAA06555.1,EC 3.1.3.16,ENSBTAG00000000223,ENSBTAP00000000272,ENSBTAP00000043518,ENSBTAP00000046832,ENSBTAT00000000272,ENSBTAT00000046197,ENSBTAT00000050064,NM_174430,NM_174430.2,NP_776855,NP_776855.1,O62830,PP2C-beta,PPM1B,PPM1B-201,PPM1B-202,PPM1B_BOVIN,Protein phosphatase 1B,Protein phosphatase 2C isoform beta,Protein phosphatase, Mg2+/Mn2+ dependent…
PPP1R13B	9913.ENSBTAP00000059825	Protein phosphatase 1 regulatory subunit 13B.	https://smart.embl.de/smart/DDvec.cgi?smart=1131:ANK(961|990)+ANK(994|1023)+SH3(1063|1121)+	511414,A0A3Q1LWL2,A0A3Q1LWL2_BOVIN,Apoptosis-stimulating of p53 protein 1,E1BHY2,ENSBTAG00000003559,ENSBTAP00000004631,ENSBTAP00000059825,ENSBTAT00000004631,ENSBTAT00000083195,PPP1R13B,PPP1R13B-201,PPP1R13B-202,Protein phosphatase 1 regulatory subunit 13B,R-BTA-212436,R-BTA-3700989,R-BTA-5633007,R-BTA-6804759,R-BTA-73857,R-BTA-74160,UPI000572AC48,UPI0007608F36,XM_010817360.2,XM_010824992.2,XM_024…
PPP6R3	9913.ENSBTAP00000012612	Protein phosphatase 6 regulatory subunit 3.	https://smart.embl.de/smart/DDvec.cgi?smart=873:Pfam_SAPS(128|365)+Pfam_SAPS(362|513)+	515218,A0A3Q1MMR9,A0A3Q1NBQ6,A7Z051,A7Z051_BOVIN,AAI53250.1,BC153249,ENSBTAG00000009584,ENSBTAP00000012608,ENSBTAP00000012612,ENSBTAP00000029912,ENSBTAP00000029913,ENSBTAP00000068779,ENSBTAP00000072477,ENSBTAT00000012608,ENSBTAT00000012612,ENSBTAT00000029920,ENSBTAT00000029921,ENSBTAT00000069733,ENSBTAT00000075968,NM_001105372,NM_001105372.1,NP_001098842,NP_001098842.1,PPP6R3,PPP6R3-201,PPP6R3-20…
PRDM2	9913.ENSBTAP00000065254	PR/SET domain 2.	https://smart.embl.de/smart/DDvec.cgi?smart=1705:SET(28|147)+ZnF_C2H2(349|371)+ZnF_C2H2(379|401)+ZnF_C2H2(465|488)+ZnF_C2H2(1116|1138)+ZnF_C2H2(1144|1167)+ZnF_C2H2(1173|1196)+ZnF_C2H2(1314|1334)+ZnF_C2H2(1436|1456)+	2.1.1.355,789222,A0A3Q1LVN6,A0A3Q1M117,A0A3Q1M1G6,A0A3Q1M9T9,A0A3Q1M9T9_BOVIN,A0A3Q1MTN2,EC 2.1.1.355,ENSBTAG00000020552,ENSBTAP00000027387,ENSBTAP00000042109,ENSBTAP00000059386,ENSBTAP00000063385,ENSBTAP00000063558,ENSBTAP00000065254,ENSBTAP00000073708,ENSBTAT00000027383,ENSBTAT00000027387,ENSBTAT00000067363,ENSBTAT00000076043,ENSBTAT00000076597,ENSBTAT00000079197,ENSBTAT00000086222,F1N790,PR do…
PRDX1	9913.ENSBTAP00000004751	Peroxiredoxin-1; Thiol-specific peroxidase that catalyzes the reduction of hydrogen peroxide and organic hydroperoxides to water and alcohols, respectively. Plays a role in cell protection against oxidative stress by detoxifying peroxides and as sensor of hydrogen peroxide-mediated signaling events. Might participate in the signaling cascades of growth factors and tumor necrosis factor-alpha by r…	https://smart.embl.de/smart/DDvec.cgi?smart=199:Pfam_AhpC-TSA(8|142)+Pfam_1-cysPrx_C(162|197)+	1.11.1.15,1.11.1.24,281997,A6QLL7,AAI48010.1,AAX09090.1,BC148009,BT021073,EC 1.11.1.24,ENSBTAG00000003642,ENSBTAP00000004751,ENSBTAT00000004751,NM_174431,NM_174431.1,NP_776856,NP_776856.1,PRDX1,PRDX1-201,PRDX1_BOVIN,Peroxiredoxin 1,Peroxiredoxin-1,Q5E947,R-BTA-212436,R-BTA-2262752,R-BTA-3299685,R-BTA-3700989,R-BTA-5628897,R-BTA-73857,R-BTA-74160,R-BTA-8953897,UPI00004CEC09,XM_024984683,XM_0249846…
PREX2	9913.ENSBTAP00000023938	Phosphatidylinositol-3,4,5-trisphosphate dependent Rac exchange factor 2.	https://smart.embl.de/smart/DDvec.cgi?smart=1605:RhoGEF(27|213)+PH(246|363)+DEP(391|464)+DEP(492|565)+PDZ(601|674)+PDZ(685|749)+	520704,A0A3Q1M8A2,A0A3Q1MBZ6,E1BDL7,E1BDL7_BOVIN,ENSBTAG00000022169,ENSBTAP00000023938,ENSBTAP00000066337,ENSBTAP00000071612,ENSBTAT00000023938,ENSBTAT00000074518,ENSBTAT00000082175,NM_001192526,NM_001192526.1,NP_001179455,NP_001179455.1,PREX2,PREX2-201,PREX2-202,PREX2-203,R-BTA-1257604,R-BTA-162582,R-BTA-6807070,R-BTA-8948751,R-BTA-9006925,UPI00017C35BC,UPI000FC49D59,UPI000FC4E45C,bta:520704
PRICKLE2	9913.ENSBTAP00000060199	Prickle planar cell polarity protein 2.	https://smart.embl.de/smart/DDvec.cgi?smart=844:Pfam_PET(35|119)+LIM(129|186)+LIM(194|246)+LIM(254|309)+	537192,ENSBTAG00000021835,ENSBTAP00000029105,ENSBTAP00000060199,ENSBTAP00000065267,ENSBTAT00000029105,ENSBTAT00000067888,ENSBTAT00000071708,F1MHI6,F1MHI6_BOVIN,PRICKLE2,PRICKLE2-201,PRICKLE2-202,PRICKLE2-203,Prickle,Prickle planar cell polarity protein 2,Prickle-like protein 2,UPI000057F65D,XM_002696985,XM_002696985.4,XM_002696985.5,XM_005196447.3,XM_005222690,XM_005222690.3,XM_005222690.4,XM_617…
PROS1	9913.ENSBTAP00000069933	Vitamin K-dependent protein S; Anticoagulant plasma protein; it is a cofactor to activated protein C in the degradation of coagulation factors Va and VIIIa. It helps to prevent coagulation and stimulating fibrinolysis.	https://smart.embl.de/smart/DDvec.cgi?smart=676:GLA(23|86)+EGF(121|156)+EGF_CA(158|201)+EGF_CA(202|243)+EGF_CA(244|284)+LamG(322|459)+LamG(507|647)+	282006,A0A3Q1MKZ3,A0A3Q1MMH1,A0A3Q1NAF6,AAA30757.1,CAA31382.1,ENSBTAG00000023652,ENSBTAP00000032310,ENSBTAP00000068234,ENSBTAP00000069933,ENSBTAP00000072345,ENSBTAT00000032377,ENSBTAT00000067662,ENSBTAT00000070289,ENSBTAT00000078980,M13044,NM_174438,NM_174438.1,NP_776863,NP_776863.1,P07224,PROS,PROS1,PROS1-201,PROS1-202,PROS1-203,PROS1-204,PROS_BOVIN,Protein S,R-BTA-109582,R-BTA-114608,R-BTA-1597…
PTCHD1	9913.ENSBTAP00000027948	Patched domain containing 1.	https://smart.embl.de/smart/DDvec.cgi?smart=888:TRANS(20|42)+Pfam_Sterol-sensing(292|444)+	536443,A0A3Q1MCN4,A0A3Q1N2S2,ENSBTAG00000020987,ENSBTAP00000027948,ENSBTAP00000051747,ENSBTAP00000063605,ENSBTAP00000066551,ENSBTAT00000027948,ENSBTAT00000056410,ENSBTAT00000075587,ENSBTAT00000079185,G5E5Q5,G5E5Q5_BOVIN,NM_001192881,NM_001192881.1,NP_001179810,NP_001179810.1,PTCHD1,PTCHD1-201,PTCHD1-202,PTCHD1-203,Patched domain containing 1,Patched domain-containing protein 1,UPI0000EBE7FF,UPI00…
PTK7	9913.ENSBTAP00000016963	Protein tyrosine kinase 7 (inactive); Belongs to the protein kinase superfamily. Tyr protein kinase family.	https://smart.embl.de/smart/DDvec.cgi?smart=1070:SIGNAL(1|30)+IGc2(44|108)+IGc2(141|207)+IGc2(237|308)+IGc2(334|398)+IG(418|499)+IGc2(515|577)+IGc2(604|671)+TRANS(704|726)+TyrKc(796|1061)+	2.7.10.1,514819,EC 2.7.10.1,ENSBTAG00000012761,ENSBTAP00000016963,ENSBTAP00000016965,ENSBTAP00000016970,ENSBTAP00000016971,ENSBTAP00000016979,ENSBTAT00000016963,ENSBTAT00000016965,ENSBTAT00000016970,ENSBTAT00000016971,ENSBTAT00000016979,F1MWK8,F1MWK8_BOVIN,Inactive tyrosine-protein kinase 7 precursor,NM_001192965,NM_001192965.2,NP_001179894,NP_001179894.1,PTK7,PTK7 protein tyrosine kinase 7,PTK7-…
PTPRC	9913.ENSBTAP00000013320	Protein tyrosine phosphatase receptor type C.	https://smart.embl.de/smart/DDvec.cgi?smart=1243:Pfam_CD45(200|255)+FN3(260|346)+FN3(358|437)+FN3(451|529)+PTPc(590|852)+PTPc(881|1168)+	3.1.3.48,407152,EC 3.1.3.48,ENSBTAG00000023144,ENSBTAP00000013317,ENSBTAP00000013320,ENSBTAP00000052085,ENSBTAT00000013317,ENSBTAT00000013320,ENSBTAT00000057230,F1MJS9,F1MJS9_BOVIN,NM_001206523,NM_001206523.1,NP_001193452,NP_001193452.1,PTPRC,PTPRC-201,Protein tyrosine phosphatase receptor type C,R-BTA-1266738,R-BTA-1280218,R-BTA-168249,R-BTA-168256,R-BTA-202403,R-BTA-202427,R-BTA-373755,R-BTA-41…
PTPRF	9913.ENSBTAP00000065652	Receptor-type tyrosine-protein phosphatase F; Possible cell adhesion receptor. It possesses an intrinsic protein tyrosine phosphatase activity (PTPase) and dephosphorylates EPHA2 regulating its activity (By similarity).	https://smart.embl.de/smart/DDvec.cgi?smart=1907:SIGNAL(1|29)+IGc2(45|114)+IGc2(147|214)+IGc2(244|305)+FN3(319|398)+FN3(414|497)+FN3(512|591)+FN3(606|693)+FN3(709|806)+FN3(821|901)+FN3(916|997)+FN3(1012|1088)+TRANS(1262|1284)+PTPc(1351|1609)+PTPc(1638|1900)+	3.1.3.48,512072,A0A3Q1M5Q9,A0A3Q1MJ50,A0A452DIT8,A7MBJ4,AAI51593.1,BC151592,EC 3.1.3.48,ENSBTAG00000000253,ENSBTAP00000000318,ENSBTAP00000024046,ENSBTAP00000059113,ENSBTAP00000065652,ENSBTAP00000069219,ENSBTAT00000000318,ENSBTAT00000024046,ENSBTAT00000081877,ENSBTAT00000087086,ENSBTAT00000087285,NM_001101079,NM_001101079.1,NP_001094549,NP_001094549.1,PTPRF,PTPRF-201,PTPRF-202,PTPRF-203,PTPRF-204,…
PTPRQ	9913.ENSBTAP00000070237	Protein tyrosine phosphatase receptor type Q.	https://smart.embl.de/smart/DDvec.cgi?smart=3386:CLECT(194|324)+FN3(327|417)+FN3(430|507)+FN3(524|600)+FN3(612|687)+FN3(699|775)+FN3(786|861)+FN3(872|949)+FN3(960|1038)+FN3(1047|1124)+FN3(1138|1222)+FN3(1237|1375)+FN3(1388|1465)+FN3(1479|1638)+FN3(1652|1731)+FN3(1749|1826)+FN3(1843|1922)+FN3(1938|2015)+FN3(2032|2119)+FN3(2135|2216)+FN3(2233|2310)+FN3(2325|2406)+FN3(2422|2497)+FN3(2512|2605)+FN3(2…	3.1.3.48,522188,A0A3Q1M8J7,A0A3Q1M8J7_BOVIN,A0A3Q1MQX4,E1B755,EC 3.1.3.48,ENSBTAG00000026977,ENSBTAP00000038431,ENSBTAP00000045239,ENSBTAP00000045240,ENSBTAP00000070237,ENSBTAP00000072187,ENSBTAT00000038619,ENSBTAT00000048151,ENSBTAT00000048152,ENSBTAT00000075101,ENSBTAT00000076843,NM_001192555,NM_001192555.1,NP_001179484,NP_001179484.2,PTPRQ,PTPRQ-201,PTPRQ-202,PTPRQ-203,Phosphotidylinositol pho…
R3HCC1	9913.ENSBTAP00000067697	R3H domain and coiled-coil containing 1.	https://smart.embl.de/smart/DDvec.cgi?smart=554:R3H(65|139)+	614496,A0A3Q1MBN1,A0A3Q1MBN1_BOVIN,ENSBTAG00000025830,ENSBTAP00000036396,ENSBTAP00000036397,ENSBTAP00000067416,ENSBTAP00000067497,ENSBTAP00000067697,ENSBTAT00000036539,ENSBTAT00000036540,ENSBTAT00000069276,ENSBTAT00000071975,ENSBTAT00000073661,F1MFT1,F1MFT2,R3H domain and coiled-coil containing 1,R3HCC1,R3HCC1-201,R3HCC1-202,R3HCC1-203,R3HCC1-204,R3HCC1-205,UPI000FC44D03,UPI000FC4C8EF,UPI000FC4EA…
RBM14	9913.ENSBTAP00000001619	RNA-binding protein 14; May function as a nuclear receptor coactivator, enhancing transcription through other coactivators such as NCOA6 and CITED1. Regulates centriole biogenesis by suppressing the formation of aberrant centriolar protein complexes in the cytoplasm and thus preserving mitotic spindle integrity. Prevents the formation of the STIL-CENPJ complex (which can induce the formation of a…	https://smart.embl.de/smart/DDvec.cgi?smart=669:RRM(2|69)+RRM(80|145)+	511512,ENSBTAG00000001225,ENSBTAP00000001619,ENSBTAT00000001619,F1MI47,NM_001014901,NM_001014901.1,NP_001014901,NP_001014901.1,Q5EA36,RBM14,RBM14-201,RBM14_BOVIN,RNA binding motif protein 14,RNA-binding motif protein 14,RNA-binding protein 14,UPI000057DB6B,XM_005227063,XM_005227063.4,XP_005227120,XP_005227120.1,bta:511512
RBM46	9913.ENSBTAP00000002223	RNA binding motif protein 46.	https://smart.embl.de/smart/DDvec.cgi?smart=533:RRM(62|135)+RRM(142|219)+RRM(237|304)+Pfam_DND1_DSRM(392|468)+	532175,A0A3Q1LST9,E1BB24,E1BB24_BOVIN,ENSBTAG00000001696,ENSBTAP00000002223,ENSBTAP00000063472,ENSBTAT00000002223,ENSBTAT00000071328,NM_001192719,NM_001192719.1,NP_001179648,NP_001179648.1,Probable RNA-binding protein 46,RBM46,RBM46-201,RBM46-202,RNA binding motif protein 46,UPI00005BE795,UPI000383D1D3,XM_005217439,XM_005217439.3,XM_005217439.4,XM_024977323,XM_024977323.1,XM_024977324,XM_02497732…
RELCH	9913.ENSBTAP00000065884	RAB11 binding and LisH domain, coiled-coil and HEAT repeat containing.	https://smart.embl.de/smart/DDvec.cgi?smart=1220:LisH(251|283)+	504761,A0A3Q1LP78,A0A3Q1LR10,A0A3Q1M6S1,A0A3Q1M766,A0A3Q1M766_BOVIN,E1BM42,ENSBTAG00000016666,ENSBTAP00000022164,ENSBTAP00000022165,ENSBTAP00000058810,ENSBTAP00000059413,ENSBTAP00000065884,ENSBTAP00000066050,ENSBTAT00000022164,ENSBTAT00000022165,ENSBTAT00000066933,ENSBTAT00000072665,ENSBTAT00000086433,ENSBTAT00000087072,KIAA1468,RELCH,RELCH-201,RELCH-202,RELCH-203,RELCH-204,RELCH-205,UPI0000EBE19…
RELN	9913.ENSBTAP00000004768	Reelin; Extracellular matrix serine protease that plays a role in layering of neurons in the cerebral cortex and cerebellum. Regulates microtubule function in neurons and neuronal migration. Affects migration of sympathetic preganglionic neurons in the spinal cord, where it seems to act as a barrier to neuronal migration. Enzymatic activity is important for the modulation of cell adhesion. Bindin…	https://smart.embl.de/smart/DDvec.cgi?smart=3460:SIGNAL(1|25)+Pfam_Reeler(41|170)+EGF(673|701)+EGF_like(1032|1060)+EGF(1411|1441)+EGF_like(1767|1795)+EGF(2131|2160)+EGF(2855|2883)+EGF(3230|3259)+	281450,3.4.21.-,A0A3Q1LQM5,A5PKC5,AAI42439.1,BC142438,EC 3.4.21.-,ENSBTAG00000003658,ENSBTAP00000004766,ENSBTAP00000004768,ENSBTAP00000044003,ENSBTAP00000044434,ENSBTAP00000054735,ENSBTAP00000055787,ENSBTAP00000062490,ENSBTAT00000004766,ENSBTAT00000004768,ENSBTAT00000046737,ENSBTAT00000047212,ENSBTAT00000063792,ENSBTAT00000065096,ENSBTAT00000077577,F1MUS6,NM_001206458,NM_001206458.1,NP_001193387,…
RESF1	9913.ENSBTAP00000006581	Retroelement silencing factor 1.	https://smart.embl.de/smart/DDvec.cgi?smart=1741:Pfam_DUF4617(673|1731)+	510651,A7MBK5,A7MBK5_BOVIN,A7Z077,AAI51613.1,AAI53278.1,BC151612,BC153277,ENSBTAG00000004999,ENSBTAP00000006581,ENSBTAP00000048833,ENSBTAP00000064550,ENSBTAT00000006581,ENSBTAT00000052937,ENSBTAT00000078545,KIAA1551,LOC510651,LOC510651 protein,NM_001101072,NM_001101072.2,NP_001094542,NP_001094542.1,RESF1,RESF1-201,RESF1-202,RESF1-203,Retroelement silencing factor 1,UPI00005BCA6D,UPI00015C7090,Unc…
RFX6	9913.ENSBTAP00000000329	Regulatory factor X6.	https://smart.embl.de/smart/DDvec.cgi?smart=927:Pfam_RFX_DNA_binding(120|198)+	524074,DNA-binding protein RFX6,E1BFK8,E1BFK8_BOVIN,ENSBTAG00000000264,ENSBTAP00000000329,ENSBTAP00000037903,ENSBTAT00000000329,ENSBTAT00000038087,RFX6,RFX6-201,Regulatory factor X 6,Regulatory factor X6,UPI00022639F0,XM_003582601.4,XM_003586463,XM_003586463.4,XM_003586463.5,XP_003582649.2,XP_003586511,XP_003586511.1,bta:524074
RGS7	9913.ENSBTAP00000051949	Regulator of G-protein signaling 7; Regulates G protein-coupled receptor signaling cascades. Inhibits signal transduction by increasing the GTPase activity of G protein alpha subunits, thereby driving them into their inactive GDP- bound form. The RGS7/GNB5 dimer enhances GNAO1 GTPase activity. May play a role in synaptic vesicle exocytosis. Modulates the activity of potassium channels that are ac…	https://smart.embl.de/smart/DDvec.cgi?smart=469:DEP(37|112)+GGL(255|316)+RGS(333|448)+	281452,6N9G,A0A3Q1M767,A0A3Q1MA36,A0A3Q1MGD0,AAC99482.1,AAI13239.1,AF011359,BC113238,ENSBTAG00000005410,ENSBTAP00000007123,ENSBTAP00000051949,ENSBTAP00000064245,ENSBTAP00000067451,ENSBTAP00000068058,ENSBTAT00000007123,ENSBTAT00000057157,ENSBTAT00000073546,ENSBTAT00000080772,ENSBTAT00000085986,NM_174169,NM_174169.2,NP_776594,NP_776594.1,O46470,Q2HJA0,R-BTA-162582,R-BTA-372790,R-BTA-388396,R-BTA-39…
RMDN3	9913.ENSBTAP00000003795	Regulator of microtubule dynamics protein 3; Involved in cellular calcium homeostasis regulation (By similarity). May participate in differentiation and apoptosis of keratinocytes. Overexpression induces apoptosis (By similarity). Belongs to the RMDN family.	https://smart.embl.de/smart/DDvec.cgi?smart=471:TRANS(10|32)+	514748,A0A3Q1NHA2,AAI16058.1,BC116057,ENSBTAG00000002921,ENSBTAP00000003795,ENSBTAP00000035941,ENSBTAP00000071318,ENSBTAT00000003795,ENSBTAT00000036077,ENSBTAT00000082555,FAM82A2,FAM82C,NM_001075679,NM_001075679.1,NP_001069147,NP_001069147.1,Protein FAM82A2,Protein FAM82C,Q1JQC5,RMD-3,RMD3_BOVIN,RMDN3,RMDN3-201,RMDN3-202,Regulator of microtubule dynamics 3,Regulator of microtubule dynamics protei…
RNF38	9913.ENSBTAP00000074200	Ring finger protein 38.	https://smart.embl.de/smart/DDvec.cgi?smart=432:RING(380|420)+	2.3.2.27,532877,AAI02725.1,BC102724,E3 ubiquitin-protein ligase RNF38,E3 ubiquitin-protein ligase RNF38/44,EC 2.3.2.27,ENSBTAG00000005519,ENSBTAP00000007258,ENSBTAP00000007260,ENSBTAP00000007262,ENSBTAP00000060916,ENSBTAP00000065394,ENSBTAP00000072033,ENSBTAP00000074200,ENSBTAT00000007258,ENSBTAT00000007260,ENSBTAT00000007262,ENSBTAT00000066630,ENSBTAT00000072249,ENSBTAT00000085948,ENSBTAT0000008…
ROCK2	9913.ENSBTAP00000059586	Rho-associated protein kinase 2; Protein kinase which is a key regulator of actin cytoskeleton and cell polarity. Involved in regulation of smooth muscle contraction, actin cytoskeleton organization, stress fiber and focal adhesion formation, neurite retraction, cell adhesion and motility via phosphorylation of ADD1, BRCA2, CNN1, EZR, DPYSL2, EP300, MSN, MYL9/MLC2, NPM1, RDX, PPP1R12A and VIM. Ph…	https://smart.embl.de/smart/DDvec.cgi?smart=1440:S_TKc(63|325)+S_TK_X(328|388)+Pfam_Rho_Binding(945|1013)+C1(1285|1339)+	1UIX,2.7.11.1,282041,2F2U,2H9V,A0A3Q1LJY9,A0A3Q1LXY6,A0A3Q1LYD4,A0A3Q1MW77,EC 2.7.11.1,ENSBTAG00000005847,ENSBTAP00000007691,ENSBTAP00000028703,ENSBTAP00000029860,ENSBTAP00000056897,ENSBTAP00000059586,ENSBTAP00000062259,ENSBTAP00000062363,ENSBTAT00000007691,ENSBTAT00000028703,ENSBTAT00000029864,ENSBTAT00000066547,ENSBTAT00000076992,ENSBTAT00000080178,ENSBTAT00000085289,F1N319,NM_174452,NM_174452.…
RPGRIP1L	9913.ENSBTAP00000062284	RPGRIP1 like.	https://smart.embl.de/smart/DDvec.cgi?smart=1270:C2(615|712)+C2(791|896)+	518659,A0A3Q1M2C5,E1BJB4,E1BJB4_BOVIN,ENSBTAG00000012499,ENSBTAP00000016585,ENSBTAP00000062284,ENSBTAP00000067557,ENSBTAT00000016585,ENSBTAT00000079027,ENSBTAT00000083834,Protein fantom,Protein fantom isoform X1,R-BTA-162582,R-BTA-1852241,R-BTA-5358351,R-BTA-5610787,R-BTA-5617833,R-BTA-5620912,RPGRIP1 like,RPGRIP1L,RPGRIP1L-201,RPGRIP1L-202,RPGRIP1L-203,UPI000383C00A,UPI000FC49783,XM_002694781,XM…
RPS6KA6	9913.ENSBTAP00000062237	Ribosomal protein S6 kinase.	https://smart.embl.de/smart/DDvec.cgi?smart=835:SIGNAL(1|16)+S_TKc(163|420)+S_TK_X(421|482)+S_TKc(516|773)+	2.7.11.1,526227,A0A3Q1LJN0,A0A3Q1LXK8,A0A3Q1LXK8_BOVIN,A0A3Q1M4X3,A0A3Q1M608,A0A3Q1NFZ3,EC 2.7.11.1,ENSBTAG00000002015,ENSBTAP00000002611,ENSBTAP00000029946,ENSBTAP00000059659,ENSBTAP00000062237,ENSBTAP00000063716,ENSBTAP00000064886,ENSBTAP00000070657,ENSBTAT00000002611,ENSBTAT00000029957,ENSBTAT00000069521,ENSBTAT00000072482,ENSBTAT00000075096,ENSBTAT00000080892,ENSBTAT00000084963,G5E5T2,NM_0012…
RSPH10B	9913.ENSBTAP00000007760	Radial spoke head 10 homolog B.	https://smart.embl.de/smart/DDvec.cgi?smart=871:MORN(108|129)+MORN(131|152)+MORN(154|175)+MORN(178|199)+MORN(203|224)+MORN(226|247)+MORN(250|271)+MORN(283|304)+MORN(306|327)+	510922,ENSBTAG00000005908,ENSBTAP00000007760,ENSBTAP00000041144,ENSBTAT00000007760,ENSBTAT00000043585,F1N5C9,NM_001166614,NM_001166614.1,NP_001160086,NP_001160086.1,Q1JPG1,RS10B_BOVIN,RSPH10B,RSPH10B-201,Radial spoke head 10 homolog B,Radial spoke head 10 homolog B (Chlamydomonas),UPI00005C013A,XM_015460424,XM_015460424.2,XM_015460425,XM_015460425.2,XM_015460426,XM_015460426.2,XM_015460427,XM_015…
RTN1	9913.ENSBTAP00000048814	Coiled-coil domain-containing protein 175.	https://smart.embl.de/smart/DDvec.cgi?smart=930:Pfam_Reticulon(589|753)+	532565,617691,A0A140T884,A0A3S5ZP76,CC175_BOVIN,CCDC175,Coiled-coil domain-containing protein 175,E1BP30,ENSBTAG00000011451,ENSBTAP00000015213,ENSBTAP00000015217,ENSBTAP00000015218,ENSBTAP00000048814,ENSBTAP00000053463,ENSBTAT00000015213,ENSBTAT00000015217,ENSBTAT00000015218,ENSBTAT00000056790,ENSBTAT00000061568,F1MQZ0,NM_001038221,NM_001038221.2,NP_001033310,NP_001033310.1,Q2T9Z6,RTN1,RTN1-201,R…
RTN4	9913.ENSBTAP00000014745	Reticulon.	https://smart.embl.de/smart/DDvec.cgi?smart=1230:Pfam_Reticulon(1013|1177)+	359718,AAI14749.1,AAI16112.1,AAP47319.2,AY164744,BC114748,BC116111,ENSBTAG00000011104,ENSBTAP00000014744,ENSBTAP00000014745,ENSBTAP00000036007,ENSBTAT00000014744,ENSBTAT00000014745,ENSBTAT00000036144,F1N405,F1N405_BOVIN,NM_001075138,NM_001075138.2,NM_001113221,NM_001113221.2,NP_001068606,NP_001068606.1,NP_001106692,NP_001106692.1,Q1RMR8,Q7YRW9,R-BTA-162582,R-BTA-193634,R-BTA-193697,R-BTA-193704,R…
RYR1	9913.ENSBTAP00000058651	Ryanodine receptor 1.	https://smart.embl.de/smart/DDvec.cgi?smart=5026:MIR(103|158)+MIR(165|210)+MIR(216|270)+MIR(276|366)+Pfam_RYDR_ITPR(447|642)+SPRY(664|802)+Pfam_RyR(856|946)+Pfam_RyR(970|1060)+SPRY(1090|1213)+SPRY(1435|1575)+Pfam_RYDR_ITPR(2166|2376)+Pfam_RyR(2742|2832)+Pfam_RyR(2862|2946)+Pfam_RIH_assoc(3865|3983)+Pfam_EF-hand_8(4086|4136)+TRANS(4330|4352)+Pfam_RR_TM4-6(4384|4667)+Pfam_Ion_trans(4760|4937)+	100139857,A0A3Q1MBQ9,A0A3Q1MMV3,A0A3Q1MRA1,A0A3Q1MUQ4,A0A3Q1MUQ4_BOVIN,A0A3Q1N1B8,A0A3Q1N1N0,A0A3Q1N7G0,E1BDQ4,ENSBTAG00000006999,ENSBTAP00000009228,ENSBTAP00000042288,ENSBTAP00000058651,ENSBTAP00000062789,ENSBTAP00000063001,ENSBTAP00000066133,ENSBTAP00000066612,ENSBTAP00000072324,ENSBTAP00000072520,ENSBTAT00000009228,ENSBTAT00000044833,ENSBTAT00000069415,ENSBTAT00000069489,ENSBTAT00000071274,ENS…
SCAF11	9913.ENSBTAP00000058297	SR-related CTD associated factor 11.	https://smart.embl.de/smart/DDvec.cgi?smart=1453:RING(41|81)+	538632,A0A3Q1MHP9,ENSBTAG00000001810,ENSBTAP00000002366,ENSBTAP00000058297,ENSBTAP00000070761,ENSBTAT00000002366,ENSBTAT00000070393,ENSBTAT00000079492,F1N2H2,F1N2H2_BOVIN,NM_001205567,NM_001205567.1,NP_001192496,NP_001192496.1,Protein SCAF11,SCAF11,SCAF11-201,SCAF11-202,SCAF11-203,SR-related CTD associated factor 11,UPI0000EBC8A7,UPI000572E10E,XM_005206394,XM_005206394.3,XM_005206394.4,XM_0052063…
SCIN	9913.ENSBTAP00000012910	Adseverin; Ca(2+)-dependent actin filament-severing protein that has a regulatory function in exocytosis by affecting the organization of the microfilament network underneath the plasma membrane. In vitro, also has barbed end capping and nucleating activities in the presence of Ca(2+). Severing activity is inhibited by phosphatidylinositol 4,5-bis-phosphate (PIP2). Required for megakaryocyte diff…	https://smart.embl.de/smart/DDvec.cgi?smart=715:GEL(17|114)+GEL(135|227)+GEL(252|347)+GEL(396|489)+GEL(510|596)+GEL(615|710)+	281478,A2VE17,AAI33525.1,ADSV_BOVIN,Adseverin,BC133524,ENSBTAG00000009786,ENSBTAP00000012910,ENSBTAP00000046671,ENSBTAT00000012910,ENSBTAT00000049842,F1MCZ3,Gelsolin,NM_174177,NM_174177.2,NP_776602,NP_776602.1,Q27948,Q28046,SC,SCIN,SCIN-201,SCIN-202,Scinderin,UPI0000F2656F,UPI000FC4A799,bta:281478
SCYL2	9913.ENSBTAP00000018408	SCY1 like pseudokinase 2.	https://smart.embl.de/smart/DDvec.cgi?smart=929:Pfam_Pkinase_Tyr(32|324)+	782059,A6QLN8,A6QLN8_BOVIN,AAI48033.1,BC148032,ENSBTAG00000013859,ENSBTAP00000018408,ENSBTAP00000018413,ENSBTAP00000018423,ENSBTAT00000018408,ENSBTAT00000018413,ENSBTAT00000018423,F1MID0,NM_001102529,NM_001102529.1,NP_001095999,NP_001095999.1,SCY1 like pseudokinase 2,SCY1-like protein 2,SCYL2,SCYL2 protein,SCYL2-201,UPI00015884DE,XM_024992298,XM_024992298.1,XM_024992299,XM_024992299.1,XM_02499230…
SDHAF1	9913.ENSBTAP00000050423	Succinate dehydrogenase assembly factor 1, mitochondrial; Plays an essential role in the assembly of succinate dehydrogenase (SDH), an enzyme complex (also referred to as respiratory complex II) that is a component of both the tricarboxylic acid (TCA) cycle and the mitochondrial electron transport chain, and which couples the oxidation of succinate to fumarate with the reduction of ubiquinone (co…	https://smart.embl.de/smart/DDvec.cgi?smart=118:Pfam_Complex1_LYR_1(9|48)+	784051,A8PU71,AAI12497.1,BC112496,ENSBTAG00000037461,ENSBTAP00000050423,ENSBTAT00000055698,LYR motif-containing protein 8,LYRM8,NM_001110442,NM_001110442.2,NP_001103912,NP_001103912.1,SDH assembly factor 1,SDHAF1,SDHAF1-201,SDHF1_BOVIN,Succinate dehydrogenase assembly factor 1,UPI00004F0792,bta:784051
SEC24A	9913.ENSBTAP00000040703	Protein transport protein Sec24A; Component of the coat protein complex II (COPII) which promotes the formation of transport vesicles from the endoplasmic reticulum (ER). The coat has two main functions, the physical deformation of the endoplasmic reticulum membrane into vesicles and the selection of cargo molecules for their transport to the Golgi complex. Plays a central role in cargo selection…	https://smart.embl.de/smart/DDvec.cgi?smart=1099:Pfam_zf-Sec23_Sec24(434|471)+Pfam_Sec23_trunk(507|745)+Pfam_Sec23_BS(750|834)+Pfam_Sec23_helical(845|946)+Pfam_Gelsolin(970|1045)+	505089,A6QNT8,AAI48995.1,BC148994,ENSBTAG00000018322,ENSBTAP00000024382,ENSBTAP00000040701,ENSBTAP00000040703,ENSBTAT00000024382,ENSBTAT00000043109,ENSBTAT00000043111,NM_001101849,NM_001101849.1,NP_001095319,NP_001095319.1,Protein transport protein SEC24,Protein transport protein Sec24A,R-BTA-1280218,R-BTA-168256,R-BTA-199977,R-BTA-199991,R-BTA-204005,R-BTA-2132295,R-BTA-392499,R-BTA-446203,R-BTA…
SEMA4B	9913.ENSBTAP00000028346	Semaphorin 4B; Belongs to the semaphorin family.	https://smart.embl.de/smart/DDvec.cgi?smart=828:SIGNAL(1|39)+Sema(66|503)+PSI(521|575)+TRANS(706|728)+	510140,ENSBTAG00000021273,ENSBTAP00000028346,ENSBTAT00000028346,F1MYZ4,F1MYZ4_BOVIN,LOW QUALITY PROTEIN: semaphorin-4B,SEMA4B,SEMA4B-201,Semaphorin 4,Semaphorin 4B,UPI000FC4852F,XM_024982321,XM_024982321.1,XP_024838089,XP_024838089.1,bta:510140
SERPINA1	9913.ENSBTAP00000065816	Alpha-1-antiproteinase; Inhibitor of serine proteases. Its primary target is elastase, but it also has a moderate affinity for plasmin and thrombin. Inhibits trypsin, chymotrypsin and plasminogen activator (By similarity); Belongs to the serpin family.	https://smart.embl.de/smart/DDvec.cgi?smart=416:SIGNAL(1|24)+SERPIN(57|413)+	280699,A1AT_BOVIN,AAI02731.1,ABF57415.1,Alpha-1-antiproteinase,Alpha-1-antiproteinase precursor,Alpha-1-antitrypsin,Alpha-1-proteinase inhibitor,BC102730,BT025459,CAA44840.1,ENSBTAG00000018843,ENSBTAP00000004927,ENSBTAP00000025090,ENSBTAP00000038349,ENSBTAP00000042603,ENSBTAP00000065816,ENSBTAT00000004927,ENSBTAT00000025090,ENSBTAT00000038536,ENSBTAT00000045193,ENSBTAT00000072441,I04.001,NM_17388…
SERPINA3-1	9913.ENSBTAP00000054846	Serpin A3-1; Potent inhibitor of the serine proteases elastase and trypsin. Moderately inhibits the serine proteases plasmin and chymotrypsin, and the thiol protease proenkephalin-processing enzyme. Does not inhibit the serine proteases cathepsin G, furin, kallikrein, thrombin, tissue plasminogen activator and urokinase, or the cysteine proteases cathepsin B, cathepsin L and papain. Belongs to th…	https://smart.embl.de/smart/DDvec.cgi?smart=470:SERPIN(111|467)+	286804,A0A0A0MP88,A0A3Q1N535,A0A452DJK6,ENSBTAG00000046540,ENSBTAP00000004538,ENSBTAP00000042480,ENSBTAP00000054846,ENSBTAP00000065120,ENSBTAT00000004538,ENSBTAT00000045063,ENSBTAT00000064935,ENSBTAT00000083784,Endopin-1A,Muscle endopin-1A,NM_174768,NM_174768.2,NP_777193,NP_777193.2,Q2KIQ9,Q3ZEJ7,Q9TTE1,SERPINA3,SERPINA3-1,SERPINA3-1-201,SERPINA3-1-202,SERPINA3-1-203,SERPINA3A,SPA31_BOVIN,Serpin …
SERPINA3-3	9913.ENSBTAP00000055847	Serpin A3-3; Serine protease inhibitor. Strongly inhibits elastase and trypsin stoichiometrically at the molar ratio of 1:1. Acts as a moderate inhibitor of plasmin and chymotrypsin. Does not inhibit thrombin, urokinase, kallikrein, tissue plasminogen activator, cathepsin G or the cysteine proteases papain, cathepsin B or cathepsin L.	https://smart.embl.de/smart/DDvec.cgi?smart=411:SIGNAL(1|24)+SERPIN(52|408)+	615103,A0A452DJA9,ENSBTAG00000047040,ENSBTAP00000042480,ENSBTAP00000055847,ENSBTAT00000045063,ENSBTAT00000064475,Endopin 1b,Endopin-1B,G3N1U4,Muscle endopin-1B,NM_001038204,NM_001038204.2,NP_001033293,NP_001033293.1,Q2T9M2,Q3ZEJ6,SERPINA3-3,SERPINA3-3-201,SERPINA3-3-202,SERPINA3-4,SPA33_BOVIN,Serpin A,Serpin A3-3,Serpin A3-3 precursor,UPI00005BF6F0,UPI000FC46756,XM_024981936,XM_024981936.1,XM_024…
SERPINA3-7	9913.ENSBTAP00000011576	Serpin A3-7; Serine protease inhibitor.	https://smart.embl.de/smart/DDvec.cgi?smart=417:SIGNAL(1|25)+SERPIN(55|414)+	497203,A0A0A0MP92,A2I7N3,ENSBTAG00000048094,ENSBTAP00000009264,ENSBTAP00000011576,ENSBTAP00000038329,ENSBTAT00000009264,ENSBTAT00000011576,ENSBTAT00000038516,Endopin 2,G8JKW7,NM_001012283,NM_001012283.3,NP_001012283,NP_001012283.2,SERPINA3-7,SERPINA3-7-201,SERPINA3-7-202,SPA37_BOVIN,Serpin A,Serpin A3-7,Serpin A3-7 precursor,UPI0000614195,UPI000FC4FB9A,XM_005222134,XM_005222134.4,XP_005222191,XP_…
SERPINA3-8	9913.ENSBTAP00000009261	Serpin A3-8; Serine protease inhibitor.	https://smart.embl.de/smart/DDvec.cgi?smart=429:SERPIN(105|429)+	505820,A0A0A0MP89,A2I7N4,A6QPQ2,ENSBTAG00000007041,ENSBTAP00000009261,ENSBTAT00000009261,NM_001081712,NM_001081712.1,NP_001075181,NP_001075181.1,R-BTA-109582,R-BTA-114608,R-BTA-168249,R-BTA-168256,R-BTA-6798695,R-BTA-76002,R-BTA-76005,SERPINA3-8,SERPINA3-8-201,SPA38_BOVIN,Serpin A,Serpin A3-8,Serpin A3-8 precursor,UPI000F7D4BA2,bta:505820
SHLD2	9913.ENSBTAP00000025542	Shieldin complex subunit 2.	https://smart.embl.de/smart/DDvec.cgi?smart=906:Pfam_FAM35_C(722|894)+	508335,A0A3Q1M7H1,E1BBC8,E1BBC8_BOVIN,ENSBTAG00000019194,ENSBTAP00000025542,ENSBTAP00000069761,ENSBTAT00000025542,ENSBTAT00000071993,FAM35A,Protein FAM35A isoform X1,SHLD2,SHLD2-201,SHLD2-202,Shieldin complex subunit 2,UPI0002263942,UPI000383B04D,XM_002698944,XM_002698944.5,XM_002698944.6,XM_005226545,XM_005226545.3,XM_005226545.4,XM_005226546,XM_005226546.3,XM_005226546.4,XM_015461051.1,XM_01546…
SLC13A1	9913.ENSBTAP00000059034	Solute carrier family 13 member 1.	https://smart.embl.de/smart/DDvec.cgi?smart=658:Pfam_CitMHS(45|178)+Pfam_CitMHS(230|532)+Pfam_Na_sulph_symp(565|642)+	A0A3Q1LTB3,A0A3Q1LUW1,A0A3Q1LUW1_BOVIN,A0A3Q1LX33,ENSBTAG00000006674,ENSBTAP00000008767,ENSBTAP00000031639,ENSBTAP00000031640,ENSBTAP00000031641,ENSBTAP00000031644,ENSBTAP00000059034,ENSBTAP00000060053,ENSBTAP00000060298,ENSBTAT00000008767,ENSBTAT00000031690,ENSBTAT00000031691,ENSBTAT00000031692,ENSBTAT00000031695,ENSBTAT00000069084,ENSBTAT00000078998,ENSBTAT00000086311,F1MCU2,NM_001193219,NM_001…
SLC26A7	9913.ENSBTAP00000043158	Anion exchange transporter.	https://smart.embl.de/smart/DDvec.cgi?smart=655:Pfam_Sulfate_transp(47|444)+Pfam_STAS(493|636)+	617196,Anion exchange transporter,E1BD54,E1BD54_BOVIN,ENSBTAG00000032301,ENSBTAP00000043157,ENSBTAP00000043158,ENSBTAT00000045796,ENSBTAT00000045797,NM_001193146,NM_001193146.1,NP_001180075,NP_001180075.1,R-BTA-382551,R-BTA-425393,R-BTA-425407,R-BTA-427601,SLC26A7,SLC26A7-201,Solute carrier family 26 member 7,UPI0000F31E4E,XM_005215678,XM_005215678.3,XM_005215678.4,XM_010812244,XM_010812244.3,XM_…
SLC44A2	9913.ENSBTAP00000067400	Choline transporter-like protein 2; Choline transporter; Belongs to the CTL (choline transporter-like) family.	https://smart.embl.de/smart/DDvec.cgi?smart=709:TRANS(32|54)+TRANS(229|251)+TRANS(253|275)+Pfam_Choline_transpo(318|674)+	617624,A0A3Q1MET1,A5D7H3,AAI40555.1,BC140554,CTL2,CTL2_BOVIN,Choline transporter-like protein 2,ENSBTAG00000002628,ENSBTAP00000003403,ENSBTAP00000067400,ENSBTAT00000003403,ENSBTAT00000085785,NM_001098139,NM_001098139.1,NP_001091608,NP_001091608.1,R-BTA-1430728,R-BTA-1483191,R-BTA-1483206,R-BTA-1483257,R-BTA-168249,R-BTA-168256,R-BTA-382551,R-BTA-425366,R-BTA-425407,R-BTA-556833,R-BTA-6798695,SLC4…
SLC44A3	9913.ENSBTAP00000063549	Choline transporter-like protein 3.	https://smart.embl.de/smart/DDvec.cgi?smart=649:TRANS(33|55)+TRANS(214|236)+TRANS(240|262)+Pfam_Choline_transpo(289|601)+	507455,A0A452DK17,A5PK40,AAI42345.1,BC142344,CTL3,CTL3_BOVIN,Choline transporter-like protein 3,ENSBTAG00000020344,ENSBTAP00000027114,ENSBTAP00000033454,ENSBTAP00000033455,ENSBTAP00000063549,ENSBTAT00000027114,ENSBTAT00000033542,ENSBTAT00000033543,ENSBTAT00000075458,NM_001098900,NM_001098900.2,NP_001092370,NP_001092370.1,R-BTA-1430728,R-BTA-1483191,R-BTA-1483206,R-BTA-1483257,R-BTA-382551,R-BTA-4…
SLC7A2	9913.ENSBTAP00000013304	Solute carrier family 7 member 2.	https://smart.embl.de/smart/DDvec.cgi?smart=669:Pfam_AA_permease(49|457)+TRANS(500|522)+TRANS(532|554)+Pfam_AA_permease_C(566|616)+	538708,A0A3Q1MF81,Cationic amino acid transporter 2 isoform X1,E1B968,E1B968_BOVIN,ENSBTAG00000010085,ENSBTAP00000013304,ENSBTAP00000013314,ENSBTAP00000069189,ENSBTAT00000013304,ENSBTAT00000013314,ENSBTAT00000075823,SLC7A2,SLC7A2-201,SLC7A2-202,Solute carrier family 7 member 2,UPI00005C0383,UPI000FC44828,XM_005226025,XM_005226025.4,XM_010820288,XM_010820288.3,XP_005226082,XP_005226082.2,XP_010818…
SLC9A3R1	9913.ENSBTAP00000034568	Na(+)/H(+) exchange regulatory cofactor NHE-RF1; Scaffold protein that connects plasma membrane proteins with members of the ezrin/moesin/radixin family and thereby helps to link them to the actin cytoskeleton and to regulate their surface expression. Necessary for recycling of internalized ADRB2. Was first known to play a role in the regulation of the activity and subcellular location of SLC9A3.…	https://smart.embl.de/smart/DDvec.cgi?smart=368:PDZ(22|94)+PDZ(170|242)+Pfam_EBP50_C(243|368)+	505242,AAI02808.1,BC102807,EBP50,ENSBTAG00000011382,ENSBTAP00000015119,ENSBTAP00000034568,ENSBTAT00000015119,ENSBTAT00000034682,Ezrin-radixin-moesin-binding phosphoprotein 50,NHERF,NHERF-1,NHERF1,NHRF1_BOVIN,NM_001077852,NM_001077852.2,NP_001071320,NP_001071320.1,Na(+)/H(+) exchange regulatory cofactor NHE-RF1,Q3SZK8,Regulatory cofactor of Na(+)/H(+) exchanger,SLC9A3 regulator 1,SLC9A3R1,SLC9A3R1…
SMG8	9913.ENSBTAP00000004365	Protein SMG8; Involved in nonsense-mediated decay (NMD) of mRNAs containing premature stop codons. Is recruited by release factors to stalled ribosomes together with SMG1 and SMG9 (forming the SMG1C protein kinase complex) and, in the SMG1C complex, is required to mediate the recruitment of SMG1 to the ribosome:SURF complex and to suppress SMG1 kinase activity until the ribosome:SURF complex loca…	https://smart.embl.de/smart/DDvec.cgi?smart=1024:Pfam_Smg8_Smg9(41|993)+	522040,A0A3Q1M0K5,A0A3Q1NAF1,A1A4J7,ENSBTAG00000003365,ENSBTAP00000004365,ENSBTAP00000004366,ENSBTAP00000045487,ENSBTAP00000051930,ENSBTAP00000063515,ENSBTAP00000068229,ENSBTAT00000004365,ENSBTAT00000004366,ENSBTAT00000048450,ENSBTAT00000052191,ENSBTAT00000077804,ENSBTAT00000079775,F1MZ61,F1N2J0,GDPD1,NM_001076400,NM_001076400.1,NM_001080286,NM_001080286.1,NP_001069868,NP_001069868.1,NP_001073755…
SNX31	9913.ENSBTAP00000014975	Sorting nexin 31.	https://smart.embl.de/smart/DDvec.cgi?smart=437:PX(1|105)+	781881,E1BDG2,E1BDG2_BOVIN,ENSBTAG00000011271,ENSBTAP00000014975,ENSBTAP00000034358,ENSBTAT00000014975,ENSBTAT00000034466,SNX31,SNX31-201,Sorting nexin 31,Sorting nexin-31,Sorting nexin-31 isoform X1,UPI000FC462D8,XM_005215632,XM_005215632.4,XM_010812174,XM_010812174.3,XM_010812175,XM_010812175.3,XM_015474517,XM_015474517.2,XM_025001875,XM_025001875.1,XP_005215689,XP_005215689.1,XP_010810476,XP_0…
SPAG11B	9913.ENSBTAP00000046324	Sperm associated antigen 11 isoform C.	https://smart.embl.de/smart/DDvec.cgi?smart=138:Pfam_Sperm_Ag_HE2(4|70)+	783025,A4UAF0,A4UAF0_BOVIN,A4UAF3,ABI24142.1,ABI24145.1,ABI24146.1,ABI24147.1,DQ838981,DQ838984,DQ838985,DQ838986,ENSBTAG00000034952,ENSBTAP00000046324,ENSBTAP00000048247,ENSBTAP00000051941,ENSBTAT00000049431,ENSBTAT00000052962,ENSBTAT00000055645,NM_001098154,NM_001098154.1,NP_001091623,NP_001091623.1,SPAG11,SPAG11B,SPAG11B-201,SPAG11B-202,Sperm associated antigen 11 isoform C,Sperm associated an…
SPAG7	9913.ENSBTAP00000011329	Sperm-associated antigen 7.	https://smart.embl.de/smart/DDvec.cgi?smart=227:R3H(31|109)+	515086,ENSBTAG00000008590,ENSBTAP00000011329,ENSBTAP00000035099,ENSBTAT00000011329,ENSBTAT00000035221,F1MZE4,F1MZE4_BOVIN,NM_001038543,NM_001038543.2,NP_001033632,NP_001033632.1,SPAG7,SPAG7-201,Sperm associated antigen 7,Sperm-associated antigen 7,UPI00005BF01D,bta:515086
SPATA5	9913.ENSBTAP00000070681	Spermatogenesis associated 5.	https://smart.embl.de/smart/DDvec.cgi?smart=868:CDC48_N(39|130)+AAA(379|518)+AAA(653|773)+	100297992,A0A3Q1LMS2,A0A3Q1LSW3,A0A3Q1MIV9,A0A3Q1MIV9_BOVIN,AAA family ATPase,ENSBTAG00000000125,ENSBTAP00000000136,ENSBTAP00000058196,ENSBTAP00000060116,ENSBTAP00000070681,ENSBTAP00000072165,ENSBTAT00000000136,ENSBTAT00000067936,ENSBTAT00000069234,ENSBTAT00000082810,ENSBTAT00000083546,F1MFP1,SPATA5,SPATA5-201,SPATA5-202,SPATA5-203,SPATA5-204,SPATA5-205,Spermatogenesis associated 5,Spermatogenesi…
SPEG	9913.ENSBTAP00000055177	Striated muscle enriched protein kinase.	https://smart.embl.de/smart/DDvec.cgi?smart=3280:IGc2(55|115)+IGc2(734|801)+Pfam_SPEG_u2(812|868)+IGc2(881|949)+IGc2(980|1048)+IGc2(1076|1143)+IG(1194|1278)+FN3(1282|1368)+IG(1396|1482)+IGc2(1497|1564)+STYKc(1601|1854)+IGc2(2605|2673)+FN3(2687|2766)+STYKc(2979|3231)+	2.7.11.1,523490,EC 2.7.11.1,ENSBTAG00000046176,ENSBTAP00000055177,ENSBTAT00000066051,G3N022,G3N022_BOVIN,NM_001142485,NM_001142485.2,NP_001135957,NP_001135957.2,SPEG,SPEG-201,Striated muscle enriched protein kinase,UPI000FC4796B,bta:523490
SPOP	9913.ENSBTAP00000007660	Speckle-type POZ protein; Component of a cullin-RING-based BCR (BTB-CUL3-RBX1) E3 ubiquitin-protein ligase complex that mediates the ubiquitination of target proteins, leading most often to their proteasomal degradation. In complex with CUL3, involved in ubiquitination and proteasomal degradation of BRMS1, DAXX, PDX1/IPF1, GLI2 and GLI3. In complex with CUL3, involved in ubiquitination of MACROH2…	https://smart.embl.de/smart/DDvec.cgi?smart=374:MATH(36|142)+BTB(200|297)+	530618,AAI19971.1,BC119970,ENSBTAG00000005824,ENSBTAP00000007660,ENSBTAT00000007660,NM_001075936,NM_001075936.1,NP_001069404,NP_001069404.1,Q0VCW1,R-BTA-162582,R-BTA-5358351,R-BTA-5632684,SPOP,SPOP-201,SPOP_BOVIN,Speckle type BTB/POZ protein,Speckle-type POZ protein,UPI0000003F5C,XM_005220571,XM_005220571.2,XM_005220571.3,XM_005220572,XM_005220572.3,XM_005220572.4,XP_005220628,XP_005220628.1,XP_0…
SPTY2D1	9913.ENSBTAP00000002177	SPT2 chromatin protein domain containing 1.	https://smart.embl.de/smart/DDvec.cgi?smart=681:SPT2(570|679)+	539967,E1BBR9,E1BBR9_BOVIN,ENSBTAG00000001660,ENSBTAP00000002177,ENSBTAT00000002177,NM_001205738,NM_001205738.1,NP_001192667,NP_001192667.1,Protein SPT2,Protein SPT2 homolog,SPT2 chromatin protein domain containing 1,SPTY2D1,SPTY2D1-201,UPI0000EBE64E,bta:539967
SRPRA	9913.ENSBTAP00000018762	Signal recognition particle receptor subunit alpha; Component of the SRP (signal recognition particle) receptor. Ensures, in conjunction with the signal recognition particle, the correct targeting of the nascent secretory proteins to the endoplasmic reticulum membrane system (By similarity).	https://smart.embl.de/smart/DDvec.cgi?smart=639:Pfam_SRP-alpha_N(27|309)+SRP54_N(321|398)+SRP54(419|638)+	281504,AAI05265.1,BC105264,DP-alpha,Docking protein alpha,ENSBTAG00000014105,ENSBTAP00000018762,ENSBTAT00000018762,F1MNJ2,NM_001075122,NM_001075122.1,NP_001068590,NP_001068590.1,Q3MHE8,SR-alpha,SRP receptor subunit alpha,SRPR,SRPRA,SRPRA-201,SRPRA_BOVIN,UPI00005B6421,bta:281504
SRRM2	9913.ENSBTAP00000066669	Serine/arginine repetitive matrix 2.	https://smart.embl.de/smart/DDvec.cgi?smart=2741:Pfam_cwf21(58|101)+CTD(559|679)+	539515,A0A3Q1M0D6,A0A3Q1M0D6_BOVIN,A0A3Q1MP73,ENSBTAG00000012683,ENSBTAP00000013174,ENSBTAP00000016849,ENSBTAP00000037356,ENSBTAP00000037357,ENSBTAP00000066669,ENSBTAP00000071437,ENSBTAT00000013174,ENSBTAT00000016849,ENSBTAT00000037527,ENSBTAT00000037528,ENSBTAT00000071602,ENSBTAT00000075509,F1MI03,R-BTA-72163,R-BTA-72172,R-BTA-72203,R-BTA-8953854,SRRM2,SRRM2-201,SRRM2-202,SRRM2-203,Serine/argini…
SS18L2	9913.ENSBTAP00000066388	SS18L2 protein.	https://smart.embl.de/smart/DDvec.cgi?smart=77:Pfam_SSXT(13|74)+	618689,AAI02913.1,BC102912,ENSBTAG00000053695,ENSBTAP00000066388,ENSBTAT00000075316,NM_001205374,NM_001205374.1,NP_001192303,NP_001192303.1,Q3ZC51,Q3ZC51_BOVIN,SS18 like 2,SS18-like protein 2,SS18L2,SS18L2 protein,SS18L2-201,UPI000058255A,bta:618689
STK31	9913.ENSBTAP00000014042	Serine/threonine kinase 31.	https://smart.embl.de/smart/DDvec.cgi?smart=1018:TUDOR(81|135)+Pfam_Pkinase(793|971)+	505226,C4H7orf46,E1BBF0,E1BBF0_BOVIN,ENSBTAG00000010609,ENSBTAP00000014042,ENSBTAT00000014042,FAM221A,Family with sequence similarity 221, member A,STK31,STK31-201,Serine/threonine kinase 31,UPI00023AD6AA,XM_005205559,XM_005205559.4,XM_005205560,XM_005205560.3,XM_005205560.4,XM_015463069.1,XM_015469714,XM_015469714.2,XM_015469715,XM_015469715.2,XM_015469716,XM_015469716.2,XM_015469719,XM_01546971…
STK32A	9913.ENSBTAP00000071007	Serine/threonine kinase 32A; Belongs to the protein kinase superfamily.	https://smart.embl.de/smart/DDvec.cgi?smart=396:S_TKc(23|281)+	100125774,2.7.11.1,A0A3Q1LV33,A0A3Q1MNB4,A0A3Q1MNB4_BOVIN,EC 2.7.11.1,ENSBTAG00000000626,ENSBTAP00000000825,ENSBTAP00000035047,ENSBTAP00000035048,ENSBTAP00000035049,ENSBTAP00000035050,ENSBTAP00000048543,ENSBTAP00000059121,ENSBTAP00000071007,ENSBTAT00000000825,ENSBTAT00000035169,ENSBTAT00000035170,ENSBTAT00000035171,ENSBTAT00000035172,ENSBTAT00000054821,ENSBTAT00000085521,ENSBTAT00000087426,G5E677…
STX16-NPEPL1	9913.ENSBTAP00000005055	t-SNARE coiled-coil homology domain-containing protein; Belongs to the syntaxin family.	https://smart.embl.de/smart/DDvec.cgi?smart=322:t_SNARE(222|289)+TRANS(300|319)+	519624,E1BIQ3,E1BIQ3_BOVIN,ENSBTAG00000003872,ENSBTAP00000005054,ENSBTAP00000005055,ENSBTAT00000005054,ENSBTAT00000005055,R-BTA-199991,R-BTA-5653656,R-BTA-6811440,R-BTA-6811442,STX16,STX16-NPEPL1,STX16-NPEPL1-201,Syntaxin 16,Syntaxin-16 isoform X6,UPI00005BDFA1,XM_002692416,XM_002692416.5,XM_002692417,XM_002692417.3,XM_002692418,XM_002692418.3,XM_002692419,XM_002692419.2,XM_002692419.3,XM_0027011…
SYCP1	9913.ENSBTAP00000074043	Synaptonemal complex protein 1.	https://smart.embl.de/smart/DDvec.cgi?smart=932:Pfam_SCP-1(28|76)+Pfam_SCP-1(72|759)+	A0A3Q1LUU9,A0A3Q1M441,A0A3Q1MIB7,A0A3Q1MIB7_BOVIN,A0A3Q1MKG0,E1BLN1,ENSBTAG00000032071,ENSBTAP00000030740,ENSBTAP00000042863,ENSBTAP00000059018,ENSBTAP00000064954,ENSBTAP00000069713,ENSBTAP00000074043,ENSBTAT00000030769,ENSBTAT00000045477,ENSBTAT00000066956,ENSBTAT00000071167,ENSBTAT00000081896,ENSBTAT00000082621,SYCP1,SYCP1-201,SYCP1-202,SYCP1-203,SYCP1-204,SYCP1-205,Synaptonemal complex protein…
SYCP2	9913.ENSBTAP00000004704	Synaptonemal complex protein 2.	http://smart.embl.de/smart/DDvec.cgi?smart=1336:	A0A3Q1LLR2,A0A3Q1M9X8,A0A3Q1NLV1,ENSBTAG00000003608,ENSBTAP00000004704,ENSBTAP00000057537,ENSBTAP00000067383,ENSBTAP00000073437,ENSBTAT00000004704,ENSBTAT00000076162,ENSBTAT00000076409,ENSBTAT00000083737,F1MV84,F1MV84_BOVIN,SYCP2,SYCP2-201,SYCP2-202,SYCP2-203,SYCP2-204,Synaptonemal complex protein 2,UPI000FC48D07,UPI000FC49926,UPI000FC4C7CD,UPI000FC4F304,XM_025001144,XM_025001144.1,XM_025001145,X…
SYN1	9913.ENSBTAP00000027503	Synapsin-1; Neuronal phosphoprotein that coats synaptic vesicles, binds to the cytoskeleton, and is believed to function in the regulation of neurotransmitter release. The complex formed with NOS1 and CAPON proteins is necessary for specific nitric-oxid functions at a presynaptic level (By similarity).	https://smart.embl.de/smart/DDvec.cgi?smart=706:Pfam_Synapsin_N(1|32)+Pfam_Synapsin(111|212)+Pfam_Synapsin_C(214|416)+	1AUV,1AUX,281510,ENSBTAG00000005042,ENSBTAP00000006652,ENSBTAP00000027503,ENSBTAP00000030045,ENSBTAT00000006652,ENSBTAT00000027503,ENSBTAT00000030057,F1MCX7,NM_174191,NM_174191.2,NP_776616,NP_776616.1,P17599,SYN1,SYN1-201,SYN1_BOVIN,Synapsin,Synapsin I,Synapsin-1,UPI0000179AF5,XM_024987763,XM_024987763.1,XP_024843531,XP_024843531.1,bta:281510
SYNE2	9913.ENSBTAP00000029285	Spectrin repeat containing nuclear envelope protein 2.	https://smart.embl.de/smart/DDvec.cgi?smart=6919:CH(33|134)+CH(183|281)+SPEC(1436|1537)+SPEC(1543|1648)+SPEC(2261|2360)+SPEC(2736|2836)+SPEC(3159|3259)+SPEC(3693|3788)+SPEC(3795|3893)+SPEC(4846|4945)+SPEC(4952|5057)+SPEC(5067|5171)+SPEC(5178|5278)+SPEC(5284|5386)+SPEC(5602|5702)+SPEC(5709|5816)+SPEC(5819|5919)+SPEC(5926|6024)+SPEC(6031|6138)+SPEC(6145|6247)+SPEC(6254|6354)+SPEC(6585|6688)+SPEC(66…	540504,ENSBTAG00000025450,ENSBTAP00000012582,ENSBTAP00000029285,ENSBTAT00000012582,ENSBTAT00000029285,F1MF78,F1MF78_BOVIN,NM_001206586,NM_001206586.1,NP_001193515,NP_001193515.1,Nesprin-2,SYNE2,SYNE2-201,UPI0001D57DB2,XM_010809508,XM_010809508.3,XM_010809509,XM_010809509.3,XM_010809510,XM_010809510.3,XM_010809511,XM_010809511.3,XM_010809512,XM_010809512.3,XM_010809513,XM_010809513.3,XM_024997770,…
SZT2	9913.ENSBTAP00000007333	SZT2 subunit of KICSTOR complex.	http://smart.embl.de/smart/DDvec.cgi?smart=2576:	533805,ENSBTAG00000005580,ENSBTAP00000007330,ENSBTAP00000007333,ENSBTAP00000023553,ENSBTAP00000033198,ENSBTAP00000033199,ENSBTAP00000056171,ENSBTAT00000007330,ENSBTAT00000007333,ENSBTAT00000023553,ENSBTAT00000033281,ENSBTAT00000033282,ENSBTAT00000066187,F1N2Q8,F1N2Q8_BOVIN,KICSTOR complex protein SZT2,KICSTOR complex protein SZT2 isoform X1,R-BTA-2262752,R-BTA-8953897,R-BTA-9639288,SZT2,SZT2 subu…
TBCK	9913.ENSBTAP00000005539	TBC1 domain containing kinase.	https://smart.embl.de/smart/DDvec.cgi?smart=924:Pfam_Pkinase_Tyr(63|301)+TBC(494|705)+RHOD(811|917)+	528650,A0A3Q1LFM6,ENSBTAG00000004227,ENSBTAP00000005539,ENSBTAP00000005541,ENSBTAP00000057007,ENSBTAT00000005539,ENSBTAT00000005541,ENSBTAT00000080873,F1MSR5,F1MSR5_BOVIN,TBC1 domain containing kinase,TBCK,TBCK-201,TBCK-202,UPI0001D5755D,UPI000572DA8E,XM_002688086,XM_002688086.5,XM_005207674,XM_005207674.4,XM_024993508,XM_024993508.1,XM_024993509,XM_024993509.1,XM_024993510,XM_024993510.1,XP_0026…
TDRD9	9913.ENSBTAP00000027199	Tudor domain containing 9.	https://smart.embl.de/smart/DDvec.cgi?smart=1352:DEXDc(125|295)+HELICc(369|471)+HA2(534|635)+TUDOR(913|972)+	A0A3Q1LTL4,A0A3Q1M5G5,A0A3Q1MM37,A0A3Q1N558,ENSBTAG00000020402,ENSBTAP00000027199,ENSBTAP00000060416,ENSBTAP00000065145,ENSBTAP00000065190,ENSBTAP00000072158,ENSBTAT00000027199,ENSBTAT00000082157,ENSBTAT00000082193,ENSBTAT00000086307,ENSBTAT00000086996,F1MNA1,F1MNA1_BOVIN,TDRD9,TDRD9-201,TDRD9-202,TDRD9-203,TDRD9-204,TDRD9-205,Tudor domain containing 9,UPI000FC45020,UPI000FC48A19,UPI000FC4A02C,UP…
TEK	9913.ENSBTAP00000026836	Angiopoietin-1 receptor; Tyrosine-protein kinase that acts as cell-surface receptor for ANGPT1, ANGPT2 and ANGPT4 and regulates angiogenesis, endothelial cell survival, proliferation, migration, adhesion and cell spreading, reorganization of the actin cytoskeleton, but also maintenance of vascular quiescence. Has anti-inflammatory effects by preventing the leakage of proinflammatory plasma protei…	https://smart.embl.de/smart/DDvec.cgi?smart=1125:SIGNAL(1|22)+Pfam_Ig_Tie2_1(24|118)+IG_like(128|209)+EGF_Lam(227|264)+EGF(267|299)+IG_like(356|442)+FN3(444|528)+FN3(543|626)+FN3(640|722)+TRANS(749|771)+TyrKc(825|1093)+	2.7.10.1,280939,A0A3Q1NG24,Angiopoietin-1 receptor,Angiopoietin-1 receptor precursor,CAA50555.1,CD202b,EC 2.7.10.1,ENSBTAG00000020148,ENSBTAP00000026836,ENSBTAP00000070712,ENSBTAT00000026836,ENSBTAT00000071990,Endothelial tyrosine kinase,Endothelial-specific receptor tyrosine kinase,NM_173964,NM_173964.2,NP_776389,NP_776389.1,Q06807,R-BTA-109582,R-BTA-1280215,R-BTA-162582,R-BTA-168256,R-BTA-20273…
TF	9913.ENSBTAP00000009564	Serotransferrin; Transferrins are iron binding transport proteins which can bind two Fe(3+) ions in association with the binding of an anion, usually bicarbonate. It is responsible for the transport of iron from sites of absorption and heme degradation to those of storage and utilization. Serum transferrin may also have a further role in stimulating cell proliferation.	https://smart.embl.de/smart/DDvec.cgi?smart=704:SIGNAL(1|19)+TR_FER(25|363)+TR_FER(364|693)+	280705,Beta-1 metal-binding globulin,ENSBTAG00000007273,ENSBTAP00000009564,ENSBTAT00000009564,G3X6N3,NM_177484,NM_177484.3,NP_803450,NP_803450.2,Q0IIK2,Q29443,Serotransferrin,Serotransferrin precursor,Siderophilin,TF,TF-201,TRFE_BOVIN,Transferrin,UPI000FC46148,bta:280705
TGFB2	9913.ENSBTAP00000064427	Transforming growth factor beta-2 proprotein; Transforming growth factor beta-2 proprotein: Precursor of the Latency-associated peptide (LAP) and Transforming growth factor beta-2 (TGF-beta-2) chains, which constitute the regulatory and active subunit of TGF-beta-2, respectively. Transforming growth factor beta-2: Multifunctional protein that regulates various processes such as angiogenesis and h…	https://smart.embl.de/smart/DDvec.cgi?smart=442:Pfam_TGFb_propeptide(20|312)+TGFB(345|442)+	534069,A0A3Q1M2Z5,ENSBTAG00000005359,ENSBTAP00000007045,ENSBTAP00000007053,ENSBTAP00000064427,ENSBTAT00000007045,ENSBTAT00000007053,ENSBTAT00000075358,LAP,Latency-associated peptide,MGF,Milk growth factor,NM_001113252,NM_001113252.1,NP_001106723,NP_001106723.1,P21214,R-BTA-109582,R-BTA-114608,R-BTA-1474244,R-BTA-1566948,R-BTA-2129379,R-BTA-76002,R-BTA-76005,TGF-beta-2,TGFB2,TGFB2-201,TGFB2-202,TG…
TIGD3	9913.ENSBTAP00000004005	Tigger transposable element derived 3.	https://smart.embl.de/smart/DDvec.cgi?smart=471:Pfam_HTH_23(11|57)+CENPB(73|137)+DDE_1(192|360)+	101903775,ENSBTAG00000003079,ENSBTAP00000004005,ENSBTAT00000004005,F1MZ31,F1MZ31_BOVIN,TIGD3,TIGD3-201,Tigger transposable element derived 3,Tigger transposable element-derived protein 3,UPI000057E02C,XM_005197354.3,XM_005227228,XM_005227228.3,XM_005227228.4,XP_005197411.1,XP_005227285,XP_005227285.1,bta:101903775
TMEM167B	9913.ENSBTAP00000052551	Protein kish-B; Involved in the early part of the secretory pathway. Belongs to the KISH family.	https://smart.embl.de/smart/DDvec.cgi?smart=74:Pfam_DUF1242(10|46)+TRANS(50|72)+	613426,AAI22588.1,BC122587,ENSBTAG00000038979,ENSBTAP00000052551,ENSBTAT00000056397,KISHB_BOVIN,NM_001128503,NM_001128503.1,NP_001121975,NP_001121975.1,Protein kish-B,Protein kish-B precursor,Q0IIL4,TMEM167B,TMEM167B-201,Transmembrane protein 167B,UPI0000182FF6,bta:613426
TMEM245	9913.ENSBTAP00000059685	Transmembrane protein 245.	https://smart.embl.de/smart/DDvec.cgi?smart=872:TRANS(57|79)+TRANS(116|138)+TRANS(151|173)+TRANS(188|210)+TRANS(231|253)+TRANS(273|295)+TRANS(352|374)+TRANS(450|472)+Pfam_AI-2E_transport(593|848)+	521172,A0A3Q1LJP7,A0A3Q1LZ73,A0A3Q1N446,A0A3Q1N751,A0A452DJF0,E1BD52,ENSBTAG00000038794,ENSBTAP00000047510,ENSBTAP00000052673,ENSBTAP00000059685,ENSBTAP00000064474,ENSBTAP00000066121,ENSBTAP00000066430,ENSBTAT00000053653,ENSBTAT00000056902,ENSBTAT00000075217,ENSBTAT00000082231,ENSBTAT00000082373,ENSBTAT00000086476,TM245_BOVIN,TMEM245,TMEM245-201,TMEM245-202,TMEM245-203,TMEM245-204,TMEM245-205,Tra…
TMEM70	9913.ENSBTAP00000017169	Transmembrane protein 70, mitochondrial; Involved in biogenesis of mitochondrial ATP synthase. Belongs to the TMEM70 family.	https://smart.embl.de/smart/DDvec.cgi?smart=305:TRANS(43|65)+Pfam_TMEM70(155|286)+	613774,A0A452DJC9,A6H773,ENSBTAG00000012920,ENSBTAP00000017169,ENSBTAT00000017169,NM_001099126,NM_001099126.2,NP_001092596,NP_001092596.1,TMEM70,TMEM70-201,TMM70_BOVIN,Transmembrane protein 70,Transmembrane protein 70, mitochondrial,UPI000FC4F181,bta:613774
TMEM8B	9913.ENSBTAP00000015212	Transmembrane protein 8B; May function as a regulator of the EGFR pathway. Probable tumor suppressor which may function in cell growth, proliferation and adhesion (By similarity); Belongs to the TMEM8 family.	https://smart.embl.de/smart/DDvec.cgi?smart=930:EGF(643|679)+Pfam_DUF3522(690|873)+	100125302,A6QLK4,A6QQL1,ENSBTAG00000011445,ENSBTAP00000015209,ENSBTAP00000015212,ENSBTAT00000015209,ENSBTAT00000015212,F1MLC4,NM_001103335,NM_001103335.1,NP_001096805,NP_001096805.1,NP_001096805.2,Protein NGX6,TMEM8B,TMEM8B-201,TMM8B_BOVIN,Transmembrane protein 8B,UPI000383AEF6,XM_005210055,XM_005210055.4,XM_005210056,XM_005210056.4,XM_015472516,XM_015472516.2,XM_015472517,XM_015472517.2,XP_00521…
TNKS	9913.ENSBTAP00000001917	Poly [ADP-ribose] polymerase.	https://smart.embl.de/smart/DDvec.cgi?smart=1327:ANK(215|244)+ANK(248|277)+ANK(281|310)+ANK(334|362)+ANK(368|397)+ANK(401|430)+ANK(434|463)+ANK(521|553)+ANK(557|586)+ANK(590|619)+ANK(649|677)+ANK(683|712)+ANK(716|745)+ANK(749|778)+ANK(836|865)+ANK(869|898)+ANK(902|931)+SAM(1024|1089)+Pfam_PARP(1115|1310)+	2.4.2.-,2.4.2.30,535030,E1B8R5,E1B8R5_BOVIN,EC 2.4.2.30,ENSBTAG00000001463,ENSBTAP00000001917,ENSBTAT00000001917,NM_001206160,NM_001206160.1,NM_001206160.2,NP_001193089,NP_001193089.1,PARP,Poly [ADP-ribose] polymerase,R-BTA-1257604,R-BTA-162582,R-BTA-195721,R-BTA-201681,R-BTA-392499,R-BTA-4641257,R-BTA-5688426,R-BTA-5689880,R-BTA-597592,R-BTA-6807070,R-BTA-8948751,R-BTA-9006925,TNKS,TNKS-201,Tank…
TNKS1BP1	9913.ENSBTAP00000070521	Tankyrase 1 binding protein 1.	https://smart.embl.de/smart/DDvec.cgi?smart=1774:Tankyrase_bdg_C(1603|1771)+	182 kDa tankyrase-1-binding protein,783548,A0A3Q1N4H7,A0A3Q1N4H7_BOVIN,E1BP50,ENSBTAG00000016469,ENSBTAP00000021893,ENSBTAP00000041419,ENSBTAP00000064726,ENSBTAP00000070521,ENSBTAP00000071383,ENSBTAT00000021893,ENSBTAT00000043883,ENSBTAT00000074402,ENSBTAT00000078116,ENSBTAT00000087280,R-BTA-212436,R-BTA-3700989,R-BTA-429914,R-BTA-429947,R-BTA-6791312,R-BTA-6804115,R-BTA-73857,R-BTA-74160,R-BTA-8…
TNRC18	9913.ENSBTAP00000062782	Trinucleotide repeat containing 18.	https://smart.embl.de/smart/DDvec.cgi?smart=2960:BAH(2809|2954)+	526616,A0A3Q1LN24,A0A3Q1LQX0,A0A3Q1LVI3,A0A3Q1M1I4,A0A3Q1M3L3,A0A3Q1M3L3_BOVIN,A0A3Q1MMX6,E1BLK1,ENSBTAG00000037400,ENSBTAP00000028865,ENSBTAP00000058335,ENSBTAP00000059372,ENSBTAP00000061194,ENSBTAP00000061915,ENSBTAP00000062782,ENSBTAP00000073204,ENSBTAT00000028865,ENSBTAT00000066876,ENSBTAT00000067509,ENSBTAT00000081586,ENSBTAT00000082441,ENSBTAT00000082733,ENSBTAT00000087372,TNRC18,TNRC18-201…
TOMM70	9913.ENSBTAP00000019001	Translocase of outer mitochondrial membrane 70 homolog A (S. cerevisiae).	https://smart.embl.de/smart/DDvec.cgi?smart=609:TPR(115|148)+TPR(154|187)+TPR(188|221)+TPR(330|363)+TPR(368|401)+TPR(402|435)+TPR(477|510)+TPR(511|545)+TPR(546|579)+	507707,AAI23445.1,ADK26451.1,BC123444,ENSBTAG00000014302,ENSBTAP00000019001,ENSBTAT00000019001,HM347499,Mitochondrial import receptor subunit TOM70,NM_001075328,NM_001075328.1,NP_001068796,NP_001068796.1,Q08E34,Q08E34_BOVIN,R-BTA-1632852,R-BTA-392499,R-BTA-5205647,R-BTA-5205685,R-BTA-5688426,R-BTA-5689880,R-BTA-597592,R-BTA-9612973,TOMM70,TOMM70-201,TOMM70A,Tom70,Translocase of outer mitochondria…
TOPAZ1	9913.ENSBTAP00000053356	Protein TOPAZ1; Important for normal spermatogenesis and male fertility. Specifically required for progression to the post-meiotic stages of spermatocyte development. Seems to be necessary for normal expression levels of a number of testis-expressed gene transcripts, although its role in this process is unclear.	https://smart.embl.de/smart/DDvec.cgi?smart=1653:Pfam_Asp_Glu_race_2(1191|1424)+	100296400,BK008402,DAA34974.1,E1BPT9,ENSBTAG00000044167,ENSBTAP00000053356,ENSBTAT00000061088,G7H7V7,NM_001252441,NM_001252441.1,NP_001239370,NP_001239370.1,Protein TOPAZ1,TOPAZ1,TOPAZ1-201,TOPZ1_BOVIN,UPI000233F640,bta:100296400
TOPBP1	9913.ENSBTAP00000059732	DNA topoisomerase II binding protein 1.	https://smart.embl.de/smart/DDvec.cgi?smart=1552:BRCT(25|110)+BRCT(122|198)+BRCT(216|293)+BRCT(375|453)+BRCT(568|641)+BRCT(661|746)+BRCT(920|999)+BRCT(1280|1359)+BRCT(1409|1494)+	540574,A0A3Q1LNB2,A0A3Q1LQW4,A0A3Q1LWE4,A0A3Q1LWE4_BOVIN,A0A3Q1M1V2,A0A3Q1MST6,DNA topoisomerase 2-binding protein 1,DNA topoisomerase II binding protein 1,ENSBTAG00000000526,ENSBTAP00000000686,ENSBTAP00000057639,ENSBTAP00000058449,ENSBTAP00000059732,ENSBTAP00000062046,ENSBTAP00000062606,ENSBTAP00000067344,ENSBTAT00000000686,ENSBTAT00000071046,ENSBTAT00000078321,ENSBTAT00000078550,ENSBTAT00000080…
TRAF4	9913.ENSBTAP00000050075	TNF receptor associated factor 4.	https://smart.embl.de/smart/DDvec.cgi?smart=737:RING(285|324)+Pfam_zf-TRAF(369|423)+Pfam_zf-TRAF(423|477)+Pfam_zf-TRAF(477|536)+MATH(579|712)+	781568,ENSBTAG00000038990,ENSBTAP00000050075,ENSBTAT00000056164,F6RJL7,F6RJL7_BOVIN,NM_001101280,NM_001101280.1,NP_001094750,NP_001094750.1,TNF receptor associated factor 4,TNF receptor-associated factor 4,TRAF4,TRAF4-201,UPI000FC44CFA,XM_015458578,XM_015458578.2,XP_015314064,XP_015314064.2,bta:781568
TRIP12	9913.ENSBTAP00000037967	E3 ubiquitin-protein ligase TRIP12; E3 ubiquitin-protein ligase involved in ubiquitin fusion degradation (UFD) pathway and regulation of DNA repair. Part of the ubiquitin fusion degradation (UFD) pathway, a process that mediates ubiquitination of protein at their N-terminus, regardless of the presence of lysine residues in target proteins. Acts as a key regulator of DNA damage response by acting …	https://smart.embl.de/smart/DDvec.cgi?smart=1992:HECTc(1603|1992)+	2.3.2.26,514387,A0A3Q1M409,AAI19852.1,BC119851,DAAA02006173,DAAA02006174,DAAA02006175,E1B7Q7,E3 ubiquitin-protein ligase TRIP12,EC 2.3.2.26,ENSBTAG00000021653,ENSBTAP00000028857,ENSBTAP00000037967,ENSBTAP00000064519,ENSBTAT00000028857,ENSBTAT00000038151,ENSBTAT00000071197,HECT-type E3 ubiquitin transferase TRIP12,NM_001191203,NM_001191203.1,NP_001178132,NP_001178132.1,Q0P5M6,R-BTA-1280218,R-BTA-1…
TRPV1	9913.ENSBTAP00000025131	Transient receptor potential cation channel subfamily V member 1; Belongs to the transient receptor (TC 1.A.4) family.	https://smart.embl.de/smart/DDvec.cgi?smart=843:ANK(152|184)+ANK(199|228)+ANK(246|275)+ANK(331|367)+Pfam_Ion_trans(438|699)+	107131508,A0A3Q1MWC6,A0A3Q1NEW0,A0A3Q1NIP7,E1BGM0,E1BGM0_BOVIN,ENSBTAG00000018880,ENSBTAP00000025131,ENSBTAP00000059694,ENSBTAP00000070221,ENSBTAP00000071928,ENSBTAT00000025131,ENSBTAT00000072685,ENSBTAT00000078915,ENSBTAT00000083070,R-BTA-2672351,R-BTA-3295583,R-BTA-382551,R-BTA-983712,TRPV1,TRPV1-201,TRPV1-202,TRPV1-203,TRPV1-204,UPI00005C0F67,UPI000FC455C4,UPI000FC461C4,UPI000FC4F5A0,XM_015458…
TTK	9913.ENSBTAP00000045797	TTK protein kinase.	https://smart.embl.de/smart/DDvec.cgi?smart=916:S_TKc(584|849)+	2.7.12.1,524925,Dual specificity protein kinase TTK,E1BPP1,E1BPP1_BOVIN,EC 2.7.12.1,ENSBTAG00000005456,ENSBTAP00000007179,ENSBTAP00000037936,ENSBTAP00000045797,ENSBTAP00000055368,ENSBTAT00000007179,ENSBTAT00000038120,ENSBTAT00000048817,ENSBTAT00000066037,NM_001205913,NM_001205913.1,NP_001192842,NP_001192842.1,Serine/threonine-protein kinase TTK/MPS1,TTK,TTK protein kinase,TTK-201,UPI000FC4C73D,XM…
TXNDC11	9913.ENSBTAP00000019741	Thioredoxin domain-containing protein 11; May act as a redox regulator involved in DUOX proteins folding. The interaction with DUOX1 and DUOX2 suggest that it belongs to a multiprotein complex constituting the thyroid H(2)O(2) generating system. It is however not sufficient to assist DUOX1 and DUOX2 in H(2)O(2) generation (By similarity).	https://smart.embl.de/smart/DDvec.cgi?smart=957:Pfam_Thioredoxin(110|211)+Pfam_Thioredoxin(663|755)+	513509,A4FUW8,DAA15576.1,ENSBTAG00000014823,ENSBTAP00000019741,ENSBTAT00000019741,F1N1E5,GJ062847,NM_001083420,NM_001083420.1,NP_001076889,NP_001076889.1,TXD11_BOVIN,TXNDC11,TXNDC11-201,Thioredoxin domain containing 11,Thioredoxin domain-containing protein 11,UPI0000EBE519,XM_010819082,XM_010819082.2,XM_024984822,XM_024984822.1,XP_010817384,XP_010817384.1,XP_024840590,XP_024840590.1,bta:513509
TXNDC16	9913.ENSBTAP00000061603	Thioredoxin domain containing 16.	https://smart.embl.de/smart/DDvec.cgi?smart=818:SIGNAL(1|25)+Pfam_Thioredoxin(390|493)+Pfam_Thioredoxin_6(531|720)+	536075,A0A3Q1M6P4,E1BAG3,E1BAG3_BOVIN,ENSBTAG00000010399,ENSBTAP00000013728,ENSBTAP00000046833,ENSBTAP00000046834,ENSBTAP00000061603,ENSBTAP00000069424,ENSBTAT00000013728,ENSBTAT00000050066,ENSBTAT00000050067,ENSBTAT00000069909,ENSBTAT00000084670,NM_001205394,NM_001205394.1,NP_001192323,NP_001192323.1,TXNDC16,TXNDC16-201,TXNDC16-202,TXNDC16-203,Thioredoxin domain containing 16,UPI000207BC3C,UPI00…
UBR4	9913.ENSBTAP00000020277	Ubiquitin protein ligase E3 component n-recognin 4.	https://smart.embl.de/smart/DDvec.cgi?smart=5181:Pfam_zf-UBR(1660|1725)+Pfam_E3_UbLigase_R4(4365|5161)+	2.3.2.27,514561,E1BHT5,E1BHT5_BOVIN,E3 ubiquitin-protein ligase UBR4,EC 2.3.2.27,ENSBTAG00000015240,ENSBTAP00000020277,ENSBTAP00000038033,ENSBTAP00000038036,ENSBTAP00000055265,ENSBTAT00000020277,ENSBTAT00000038218,ENSBTAT00000038221,ENSBTAT00000063469,NM_001205792,NM_001205792.1,NP_001192721,NP_001192721.1,R-BTA-1280218,R-BTA-168249,R-BTA-168256,R-BTA-6798695,R-BTA-983168,R-BTA-983169,UBR4,UBR4-2…
UGGT1	9913.ENSBTAP00000007163	UDP-glucose glycoprotein glucosyltransferase 1.	https://smart.embl.de/smart/DDvec.cgi?smart=1413:Pfam_UDP-g_GGTase(2|283)+Pfam_UDP-g_GGTase(281|1067)+	A0A3Q1LLZ3,E1B9R3,E1B9R3_BOVIN,ENSBTAG00000005444,ENSBTAP00000007163,ENSBTAP00000038498,ENSBTAP00000057826,ENSBTAT00000007163,ENSBTAT00000038688,ENSBTAT00000070031,UDP-glucose glycoprotein glucosyltransferase 1,UGGT1,UGGT1-201,UGGT1-202,UPI000FC45D9A,UPI000FC4B939,XM_002685231,XM_002685231.5,XM_005202234,XM_005202234.4,XM_024979518,XM_024979518.1,XP_002685277,XP_002685277.1,XP_005202291,XP_005202…
UMPS	9913.ENSBTAP00000018248	Orotidine 5'-phosphate decarboxylase; In the C-terminal section; belongs to the OMP decarboxylase family.	https://smart.embl.de/smart/DDvec.cgi?smart=480:Pfam_Pribosyltran(41|166)+OMPdecase(253|466)+	2.4.2.10,281568,4.1.1.23,A0A140T887,EC 2.4.2.10,EC 4.1.1.23,ENSBTAG00000013727,ENSBTAP00000018248,ENSBTAT00000018248,NM_177508,NM_177508.1,NP_803474,NP_803474.1,OMPdecase,OPRTase,Orotate phosphoribosyltransferase,Orotidine 5'-phosphate decarboxylase,P31754,Q2KHV1,UMP synthase,UMPS,UMPS-201,UMPS_BOVIN,UPI00005801DA,Uridine 5'-monophosphate synthase,Uridine monophosphate synthetase,bta:281568
UNC13A	9913.ENSBTAP00000044729	Unc-13 homolog A.	https://smart.embl.de/smart/DDvec.cgi?smart=1701:C2(2|94)+C1(560|609)+C2(683|790)+DUF1041(999|1108)+Pfam_Membr_traf_MHD(1335|1490)+C2(1544|1650)+	526874,A0A3Q1M1Y3,A0A3Q1M5A5,A0A3Q1M6C4,A0A3Q1MC52,A0A3Q1MKU3,A0A3Q1MTE3,A0A3Q1NCE4,A0A3Q1NM03,A0A3Q1NN01,ENSBTAG00000012682,ENSBTAP00000016848,ENSBTAP00000044729,ENSBTAP00000057901,ENSBTAP00000062083,ENSBTAP00000065457,ENSBTAP00000065526,ENSBTAP00000066326,ENSBTAP00000069051,ENSBTAP00000072201,ENSBTAP00000073541,ENSBTAP00000074052,ENSBTAT00000016848,ENSBTAT00000047528,ENSBTAT00000067245,ENSBTAT0…
USH2A	9913.ENSBTAP00000053495	Usherin.	https://smart.embl.de/smart/DDvec.cgi?smart=5204:LamGL(146|283)+LamNT(313|516)+EGF_like(518|572)+EGF_Lam(575|638)+EGF_Lam(641|691)+EGF_Lam(694|744)+EGF_Lam(747|792)+EGF_Lam(795|844)+EGF_Lam(847|897)+EGF_Lam(900|948)+EGF_Lam(951|999)+EGF_Lam(1002|1050)+FN3(1054|1134)+FN3(1145|1229)+FN3(1243|1348)+FN3(1362|1453)+LamG(1540|1681)+LamG(1736|1871)+FN3(1870|1940)+FN3(1954|2042)+FN3(2057|2130)+FN3(2143|2…	100296635,E1BP05,E1BP05_BOVIN,ENSBTAG00000006188,ENSBTAP00000008131,ENSBTAP00000032352,ENSBTAP00000034110,ENSBTAP00000045389,ENSBTAP00000045397,ENSBTAP00000045399,ENSBTAP00000045406,ENSBTAP00000045409,ENSBTAP00000050095,ENSBTAP00000053495,ENSBTAT00000008131,ENSBTAT00000032420,ENSBTAT00000034210,ENSBTAT00000048329,ENSBTAT00000048338,ENSBTAT00000048339,ENSBTAT00000048355,ENSBTAT00000048358,ENSBTAT0…
USP44	9913.ENSBTAP00000026571	Ubiquitin carboxyl-terminal hydrolase; Deubiquitinating enzyme that removes conjugated ubiquitin from specific proteins to regulate different cellular processes. Belongs to the peptidase C19 family.	https://smart.embl.de/smart/DDvec.cgi?smart=709:ZnF_UBP(28|77)+Pfam_UCH_1(362|654)+	3.4.19.12,517022,C19.057,E1BLZ0,E1BLZ0_BOVIN,EC 3.4.19.12,ENSBTAG00000019946,ENSBTAP00000026571,ENSBTAP00000038360,ENSBTAT00000026571,ENSBTAT00000038547,NM_001205837,NM_001205837.1,NP_001192766,NP_001192766.1,R-BTA-392499,R-BTA-5688426,R-BTA-5689880,R-BTA-597592,UPI00005BC7E5,USP44,USP44-201,Ubiquitin carboxyl-terminal hydrolase,Ubiquitin carboxyl-terminal hydrolase 44,Ubiquitin carboxyl-terminal…
VEGFD	9913.ENSBTAP00000012474	Vascular endothelial growth factor D; Belongs to the PDGF/VEGF growth factor family.	https://smart.embl.de/smart/DDvec.cgi?smart=354:SIGNAL(1|21)+PDGF(109|193)+	286799,A0A3Q1LXH6,A0A3Q1MTW6,A7MBB6,A7MBB6_BOVIN,AAI51467.1,BC151466,ENSBTAG00000009476,ENSBTAP00000012474,ENSBTAP00000038649,ENSBTAP00000058204,ENSBTAP00000065472,ENSBTAT00000012474,ENSBTAT00000038841,ENSBTAT00000066602,ENSBTAT00000078357,FIGF,FIGF protein,NM_001101043,NM_001101043.2,NP_001094513,NP_001094513.1,R-BTA-109582,R-BTA-114608,R-BTA-162582,R-BTA-194138,R-BTA-194313,R-BTA-195399,R-BTA-7…
VLDLR	9913.ENSBTAP00000067110	Very low density lipoprotein receptor.	https://smart.embl.de/smart/DDvec.cgi?smart=873:SIGNAL(1|23)+LDLa(32|69)+LDLa(71|110)+LDLa(112|151)+LDLa(153|190)+LDLa(192|231)+LDLa(238|275)+LDLa(277|314)+LDLa(317|357)+EGF(359|395)+EGF_CA(396|435)+LY(461|503)+LY(505|547)+LY(548|591)+LY(592|634)+LY(635|678)+EGF(705|750)+TRANS(797|819)+	282123,A0A3Q1LL82,A0A3Q1LWD4,A0A3Q1M7D4,A0A3Q1M988,A0A3Q1M988_BOVIN,ENSBTAG00000018517,ENSBTAP00000024648,ENSBTAP00000024650,ENSBTAP00000044478,ENSBTAP00000057530,ENSBTAP00000065005,ENSBTAP00000065962,ENSBTAP00000067110,ENSBTAT00000024648,ENSBTAT00000024650,ENSBTAT00000047258,ENSBTAT00000067046,ENSBTAT00000068334,ENSBTAT00000071362,ENSBTAT00000083030,F1MIQ2,NM_174489,NM_174489.2,NP_776914,NP_7769…
VNN1	9913.ENSBTAP00000020086	Pantetheinase; Amidohydrolase that hydrolyzes specifically one of the carboamide linkages in D-pantetheine thus recycling pantothenic acid (vitamin B5) and releasing cysteamine; Belongs to the carbon-nitrogen hydrolase superfamily. BTD/VNN family.	https://smart.embl.de/smart/DDvec.cgi?smart=510:SIGNAL(1|22)+Pfam_CN_hydrolase(50|308)+	3.5.1.92,526704,A0A140T891,A6QPH4,EC 3.5.1.92,ENSBTAG00000015094,ENSBTAP00000020086,ENSBTAT00000020086,NM_001024556,NM_001024556.2,NP_001019727,NP_001019727.2,Pantetheinase,Pantetheinase precursor,Pantetheine hydrolase,Q58CQ9,UPI000061565E,VNN1,VNN1-201,VNN1_BOVIN,Vanin 1,Vanin-1,Vascular non-inflammatory molecule 1,XM_010808580,XM_010808580.3,XM_024996664,XM_024996664.1,XP_010806882,XP_010806882…
VPS13B	9913.ENSBTAP00000058618	Vacuolar protein sorting 13 homolog B.	https://smart.embl.de/smart/DDvec.cgi?smart=4017:Pfam_Chorein_N(2|120)+Pfam_SHR-BD(2513|2722)+Pfam_VPS13_C(3568|3729)+	512656,A0A3Q1LG13,A0A3Q1LTX8,A0A3Q1LTX8_BOVIN,A0A3Q1MEI1,E1BFL6,ENSBTAG00000012357,ENSBTAP00000016404,ENSBTAP00000030845,ENSBTAP00000043463,ENSBTAP00000043464,ENSBTAP00000053466,ENSBTAP00000057259,ENSBTAP00000058618,ENSBTAP00000067297,ENSBTAT00000016404,ENSBTAT00000030877,ENSBTAT00000046137,ENSBTAT00000046139,ENSBTAT00000061272,ENSBTAT00000075247,ENSBTAT00000080548,ENSBTAT00000083035,UPI0001D57DB…
VTN	9913.ENSBTAP00000021497	Vitronectin.	https://smart.embl.de/smart/DDvec.cgi?smart=476:SIGNAL(1|19)+SO(20|62)+HX(157|200)+HX(202|248)+HX(250|296)+HX(423|470)+	507525,A0A3Q1LNE9,AAI03133.1,BC103132,ENSBTAG00000016151,ENSBTAP00000021497,ENSBTAP00000058326,ENSBTAT00000021497,ENSBTAT00000069173,NM_001035050,NM_001035050.2,NP_001030222,NP_001030222.1,Q3ZBS7,Q3ZBS7_BOVIN,R-BTA-1474244,R-BTA-1566948,R-BTA-2129379,R-BTA-3000170,R-BTA-3000171,R-BTA-3000178,UPI0000599481,UPI000FC4979D,VTN,VTN-201,VTN-202,Vitronectin,Vitronectin precursor,bta:507525
VWF	9913.ENSBTAP00000016273	Von Willebrand factor; Important in the maintenance of hemostasis, it promotes adhesion of platelets to the sites of vascular injury by forming a molecular bridge between sub-endothelial collagen matrix and platelet- surface receptor complex GPIb-IX-V. Also acts as a chaperone for coagulation factor VIII, delivering it to the site of injury, stabilizing its heterodimeric structure and protecting …	https://smart.embl.de/smart/DDvec.cgi?smart=2811:VWD(20|178)+C8(217|291)+EGF_like(302|342)+VWC(349|417)+C8(576|648)+EGF_like(677|701)+EGF_like(786|821)+VWD(855|1011)+C8(1052|1126)+Pfam_TIL(1140|1195)+VWA(1272|1455)+VWA(1495|1668)+VWA(1688|1862)+VWD(1937|2098)+C8(2129|2197)+Pfam_TIL(2200|2251)+VWC(2254|2322)+VWC(2428|2491)+VWC(2579|2641)+CT(2725|2810)+	280958,A0A3Q1LLU1,ENSBTAG00000012265,ENSBTAP00000016267,ENSBTAP00000016273,ENSBTAP00000037555,ENSBTAP00000060789,ENSBTAT00000016267,ENSBTAT00000016273,ENSBTAT00000037731,ENSBTAT00000069613,F1N0R5,F8VWF,NM_001205308,NM_001205308.1,NP_001192237,NP_001192237.1,P80012,Q28011,UPI000D53B119,UPI000FC4456E,VWF,VWF-201,VWF-202,VWF_BOVIN,Von Willebrand factor,Von Willebrand factor precursor,XM_024991341,XM…
WDHD1	9913.ENSBTAP00000025453	WD repeat and HMG-box DNA binding protein 1.	https://smart.embl.de/smart/DDvec.cgi?smart=1127:WD40(2|41)+WD40(83|122)+WD40(125|164)+WD40(173|214)+WD40(217|258)+WD40(261|301)+Pfam_Mcl1_mid(430|714)+HMG(1013|1091)+	540681,Chromosome transmission fidelity protein 4,E1B7F5,E1B7F5_BOVIN,ENSBTAG00000019120,ENSBTAP00000025453,ENSBTAP00000041327,ENSBTAT00000025453,ENSBTAT00000043783,NM_001192766,NM_001192766.1,NP_001179695,NP_001179695.1,UPI00005BD7DC,WD repeat and HMG-box DNA binding protein 1,WD repeat and HMG-box DNA-binding protein 1,WDHD1,WDHD1-201,XM_005211844,XM_005211844.4,XP_005211901,XP_005211901.1,bta:…
ZBTB1	9913.ENSBTAP00000048980	Zinc finger and BTB domain containing 1.	https://smart.embl.de/smart/DDvec.cgi?smart=713:BTB(24|121)+ZnF_C2H2(216|242)+ZnF_C2H2(421|443)+ZnF_C2H2(534|554)+ZnF_C2H2(578|600)+ZnF_C2H2(606|628)+ZnF_C2H2(634|656)+ZnF_C2H2(662|684)+ZnF_C2H2(686|709)+	526903,A0A3Q1LYS4,A0A3Q1MJA0,ENSBTAG00000040551,ENSBTAP00000048980,ENSBTAP00000065931,ENSBTAP00000071409,ENSBTAT00000051891,ENSBTAT00000072466,ENSBTAT00000076128,F1MAZ0,F1MAZ0_BOVIN,NM_001193001,NM_001193001.1,NP_001179930,NP_001179930.1,UPI00005BD817,UPI00005BD818,UPI000572D721,XM_005211980,XM_005211980.3,XM_005211980.4,XM_024997573,XM_024997573.1,XM_024997574,XM_024997574.1,XP_005212037,XP_0052…
ZC2HC1A	9913.ENSBTAP00000070954	Zinc finger C2HC domain-containing protein 1A; Belongs to the ZC2HC1 family.	https://smart.embl.de/smart/DDvec.cgi?smart=323:Pfam_zf-C2HC_2(14|38)+Pfam_zf-C2HC_2(117|141)+	516900,A0A3Q1M8T3,A0A3Q1N219,A4FUE7,AAI14758.1,BC114757,ENSBTAG00000018902,ENSBTAP00000025157,ENSBTAP00000063234,ENSBTAP00000066873,ENSBTAP00000070954,ENSBTAT00000025157,ENSBTAT00000079112,ENSBTAT00000086205,ENSBTAT00000086762,FAM164A,G1K1W5,NM_001083437,NM_001083437.1,NP_001076906,NP_001076906.1,UPI000058202B,UPI00095298E8,UPI000FC4C3FB,UPI000FC4F332,XM_010812111.1,XM_015466350.1,XP_010810413.1,…
ZDHHC20	9913.ENSBTAP00000008119	Palmitoyltransferase ZDHHC20; Catalyzes palmitoylation of Cys residues on target proteins. Catalyzes palmitoylation of Cys residues in the cytoplasmic C-terminus of EGFR, and modulates the duration of EGFR signaling by modulating palmitoylation-dependent EGFR internalization and degradation. Has a preference for acyl-CoA with C16 fatty acid chains. Can also utilize acyl-CoA with C14 and C18 fatty…	https://smart.embl.de/smart/DDvec.cgi?smart=398:TRANS(13|32)+TRANS(52|74)+Pfam_DHHC(121|259)+	2.3.1.225,615659,A0A3Q1NJ45,A0A452DIT2,AAI20295.1,BC120294,DHHC-20,ENSBTAG00000006177,ENSBTAP00000008119,ENSBTAP00000035507,ENSBTAP00000035508,ENSBTAP00000059434,ENSBTAP00000072119,ENSBTAT00000008119,ENSBTAT00000035636,ENSBTAT00000035637,ENSBTAT00000078233,ENSBTAT00000086171,NM_001076388,NM_001076388.2,NP_001069856,NP_001069856.1,Palmitoyltransferase ZDHHC20,Q0VC89,UPI0000DBDD0B,UPI000FC4D100,UPI…
ZDHHC8	9913.ENSBTAP00000006197	Palmitoyltransferase; Belongs to the DHHC palmitoyltransferase family.	https://smart.embl.de/smart/DDvec.cgi?smart=753:TRANS(15|34)+TRANS(46|68)+Pfam_DHHC(99|224)+	2.3.1.225,526847,E1B8S9,E1B8S9_BOVIN,EC 2.3.1.225,ENSBTAG00000006657,ENSBTAP00000006197,ENSBTAP00000008745,ENSBTAT00000006197,ENSBTAT00000008745,Palmitoyltransferase,Palmitoyltransferase ZDHHC5/8,Probable palmitoyltransferase ZDHHC8 isoform X1,R-BTA-174824,R-BTA-382551,R-BTA-8963896,R-BTA-8963898,UPI000D5320D1,XM_024977890,XM_024977890.1,XM_024977891,XM_024977891.1,XP_024833658,XP_024833658.1,XP_…
ZFYVE1	9913.ENSBTAP00000014664	Zinc finger FYVE-type containing 1.	https://smart.embl.de/smart/DDvec.cgi?smart=777:FYVE(590|660)+FYVE(707|776)+	537916,E1BPK7,E1BPK7_BOVIN,ENSBTAG00000011041,ENSBTAP00000014664,ENSBTAP00000055180,ENSBTAT00000014664,ENSBTAT00000064501,G3N025,NM_001206112,NM_001206112.1,NP_001193041,NP_001193041.1,UPI00005BD867,XM_005212011,XM_005212011.3,XM_005212011.4,XM_010809489,XM_010809489.2,XM_010809489.3,XM_024997708,XM_024997708.1,XP_005212068,XP_005212068.1,XP_010807791,XP_010807791.1,XP_024853476,XP_024853476.1,ZF…
ZMYM4	9913.ENSBTAP00000062143	Zinc finger MYM-type containing 4.	https://smart.embl.de/smart/DDvec.cgi?smart=1518:TRASH(310|346)+TRASH(358|398)+TRASH(410|448)+TRASH(455|494)+TRASH(500|538)+TRASH(548|584)+TRASH(656|692)+TRASH(698|733)+TRASH(741|779)+TRASH(785|820)+Pfam_DUF3504(1326|1496)+	529962,ENSBTAG00000021023,ENSBTAP00000027998,ENSBTAP00000029266,ENSBTAP00000033143,ENSBTAP00000062143,ENSBTAT00000027998,ENSBTAT00000029266,ENSBTAT00000033223,ENSBTAT00000084859,F1MHR5,F1MHR5_BOVIN,UPI00005BC328,XM_002686481,XM_002686481.6,XM_005197944.3,XM_005204934,XM_005204934.3,XM_005204934.4,XM_005204935,XM_005204935.4,XM_024990228,XM_024990228.1,XM_024990229,XM_024990229.1,XM_024990230,XM_0…
ZNF200	9913.ENSBTAP00000006843	Zinc finger protein 200.	https://smart.embl.de/smart/DDvec.cgi?smart=393:ZnF_C2H2(250|272)+ZnF_C2H2(278|300)+ZnF_C2H2(306|328)+ZnF_C2H2(334|356)+ZnF_C2H2(362|384)+	521662,A4IF67,A4IF67_BOVIN,AAI34429.1,BC134428,DAA15595.1,ENSBTAG00000005195,ENSBTAP00000006843,ENSBTAT00000006843,GJ062847,KRAB domain-containing zinc finger protein,NM_001083700,NM_001083700.2,NP_001077169,NP_001077169.1,R-BTA-212436,R-BTA-73857,R-BTA-74160,UPI00005C1F65,ZNF200,ZNF200 protein,ZNF200-201,Zinc finger protein 200,bta:521662
ZNF345	9913.ENSBTAP00000026567	Zinc finger protein 345; May be involved in transcriptional regulation; Belongs to the krueppel C2H2-type zinc-finger protein family.	https://smart.embl.de/smart/DDvec.cgi?smart=487:ZnF_C2H2(62|84)+ZnF_C2H2(90|112)+ZnF_C2H2(118|140)+ZnF_C2H2(146|168)+ZnF_C2H2(174|196)+ZnF_C2H2(202|224)+ZnF_C2H2(230|252)+ZnF_C2H2(258|280)+ZnF_C2H2(286|308)+ZnF_C2H2(314|336)+ZnF_C2H2(342|364)+ZnF_C2H2(370|392)+ZnF_C2H2(398|420)+ZnF_C2H2(426|448)+ZnF_C2H2(454|476)+	518207,AAI03363.1,BC103362,ENSBTAG00000008902,ENSBTAP00000006317,ENSBTAP00000011720,ENSBTAP00000011722,ENSBTAP00000026567,ENSBTAP00000028987,ENSBTAT00000006317,ENSBTAT00000011720,ENSBTAT00000011722,ENSBTAT00000026567,ENSBTAT00000028987,NM_001035327,NM_001035327.1,NP_001030404,NP_001030404.1,Q3SYV7,R-BTA-212436,R-BTA-73857,R-BTA-74160,UPI00005B62E2,XM_024978237,XM_024978237.1,XP_024834005,XP_02483…
ZNF770	9913.ENSBTAP00000053372	Zinc finger protein 770.	https://smart.embl.de/smart/DDvec.cgi?smart=688:ZnF_C2H2(28|50)+ZnF_C2H2(56|78)+ZnF_C2H2(82|104)+ZnF_C2H2(158|180)+ZnF_C2H2(186|208)+ZnF_C2H2(214|236)+ZnF_C2H2(292|312)+ZnF_C2H2(478|500)+ZnF_C2H2(506|528)+ZnF_C2H2(635|657)+ZnF_C2H2(663|685)+	786537,ENSBTAG00000040206,ENSBTAP00000016898,ENSBTAP00000049258,ENSBTAP00000053372,ENSBTAT00000016898,ENSBTAT00000053992,ENSBTAT00000061230,F1MPW3,F1MPW3_BOVIN,R-BTA-212436,R-BTA-73857,R-BTA-74160,UPI0002264E66,XM_010809149,XM_010809149.2,XM_010809149.3,XM_010809150,XM_010809150.2,XM_010809150.3,XM_010811246.2,XM_010811248.2,XM_024997961,XM_024997961.1,XP_010807451,XP_010807451.1,XP_010807452,XP_…
ZZEF1	9913.ENSBTAP00000053594	Zinc finger ZZ-type and EF-hand domain containing 1.	https://smart.embl.de/smart/DDvec.cgi?smart=2962:APC10(246|397)+ZnF_ZZ(1777|1825)+ZnF_ZZ(1826|1870)+	508144,E1BNA9,E1BNA9_BOVIN,ENSBTAG00000016316,ENSBTAP00000021706,ENSBTAP00000035005,ENSBTAP00000035008,ENSBTAP00000043106,ENSBTAP00000052453,ENSBTAP00000053594,ENSBTAT00000021706,ENSBTAT00000035127,ENSBTAT00000035130,ENSBTAT00000045742,ENSBTAT00000054082,ENSBTAT00000061398,NM_001206129,NM_001206129.2,NP_001193058,NP_001193058.2,UPI000D6A5851,XM_005220201,XM_005220201.4,XM_010815902,XM_010815902.3…

## Sheet: B. String network coordinates
#node	identifier	x_position	y_position	color	annotation
A2M	9913.ENSBTAP00000006167	0.27247191011235955	0.4440828402366864	rgb(117,194,239)	Alpha-2-macroglobulin; Is able to inhibit all four classes of proteinases by a unique 'trapping' mechanism. This protein has a peptide stretch, called the 'bait region' which contains specific cleavage sites for different proteinases. When a proteinase cleaves the bait region, a conformational change is induced in the protein which traps the proteinase. The entrapped enzyme remains active against…
ABCB5	9913.ENSBTAP00000060000	0.7285925487876997	0.10591715976331362	rgb(118,239,117)	ATP binding cassette subfamily B member 5.
ABTB2	9913.ENSBTAP00000007781	0.21924896510940273	0.4808284023668639	rgb(239,210,117)	Ankyrin repeat and BTB domain containing 2.
ACADL	9913.ENSBTAP00000013988	0.1841218214074512	0.5862721893491125	rgb(117,173,239)	Acyl-Coenzyme A dehydrogenase, long chain.
ACP2	9913.ENSBTAP00000027968	0.6115020697811946	0.15278106508875738	rgb(117,156,239)	Lysosomal acid phosphatase.
ADGRL1	9913.ENSBTAP00000073270	0.21924896510940273	0.92603550295858	rgb(239,152,117)	Adhesion G protein-coupled receptor L1; Calcium-independent receptor of high affinity for alpha- latrotoxin, an excitatory neurotoxin present in black widow spider venom which triggers massive exocytosis from neurons and neuroendocrine cells. Receptor for TENM2 that mediates heterophilic synaptic cell-cell contact and postsynaptic specialization. Receptor probably implicated in the regulation of …
ADGRV1	9913.ENSBTAP00000007926	0.6913364872856299	0.7311242603550296	rgb(117,117,239)	Adhesion G protein-coupled receptor V1; Belongs to the G-protein coupled receptor 2 family.
ADIPOQ	9913.ENSBTAP00000065019	0.45076877587226494	0.478698224852071	rgb(239,230,117)	Adiponectin; Important adipokine involved in the control of fat metabolism and insulin sensitivity, with direct anti-diabetic, anti-atherogenic and anti-inflammatory activities. Stimulates AMPK phosphorylation and activation in the liver and the skeletal muscle, enhancing glucose utilization and fatty-acid combustion. Antagonizes TNF-alpha by negatively regulating its expression in various tissue…
ADRA1A	9913.ENSBTAP00000067347	0.9042282672974572	0.8381656804733729	rgb(239,194,117)	Alpha-1A adrenergic receptor; This alpha-adrenergic receptor mediates its action by association with G proteins that activate a phosphatidylinositol- calcium second messenger system. Its effect is mediated by G(q) and G(11) proteins. Nuclear ADRA1A-ADRA1B heterooligomers regulate phenylephrine (PE)-stimulated ERK signaling in cardiac myocytes (By similarity).
AGAP2	9913.ENSBTAP00000009418	0.7871377882909522	0.3519526627218935	rgb(117,239,219)	ArfGAP with GTPase domain, ankyrin repeat and PH domain 2.
AGAP3	9913.ENSBTAP00000033311	0.7871377882909522	0.8557396449704142	rgb(192,239,117)	ArfGAP with GTPase domain, ankyrin repeat and PH domain 3.
ALB	9913.ENSBTAP00000022763	0.4566232998225902	0.43502958579881656	rgb(239,197,117)	Serum albumin; Serum albumin, the main protein of plasma, has a good binding capacity for water, Ca(2+), Na(+), K(+), fatty acids, hormones, bilirubin and drugs. Its main function is the regulation of the colloidal osmotic pressure of blood. Major zinc transporter in plasma, typically binds about 80% of all plasma zinc (By similarity). Major calcium and magnesium transporter in plasma, binds appr…
ALMS1	9913.ENSBTAP00000044487	0.8632465996451805	0.13520710059171598	rgb(217,239,117)	ALMS1 centrosome and basal body associated protein.
ALS2	9913.ENSBTAP00000053718	0.8749556475458309	0.6858579881656806	rgb(117,126,239)	Alsin Rho guanine nucleotide exchange factor ALS2.
ANGEL2	9913.ENSBTAP00000004825	0.24266706091070372	0.5862721893491125	rgb(117,117,239)	Protein angel homolog 2; Belongs to the CCR4/nocturin family.
ANKRD42	9913.ENSBTAP00000033880	0.14314015375517447	0.8557396449704142	rgb(117,239,213)	Ankyrin repeat domain 42.
AP5B1	9913.ENSBTAP00000054921	0.1138675340035482	0.36366863905325447	rgb(117,236,239)	AP-5 complex subunit beta-1; As part of AP-5, a probable fifth adaptor protein complex, it may be involved in endosomal transport.
APBB2	9913.ENSBTAP00000039437	0.6700473092844471	0.8674556213017752	rgb(117,218,239)	Amyloid beta precursor protein binding family B member 2.
APC2	9913.ENSBTAP00000035274	0.8515375517445299	0.37538461538461537	rgb(117,239,186)	APC regulator of WNT signaling pathway 2.
APOB	9913.ENSBTAP00000038799	0.4614133648728563	0.30615384615384617	rgb(117,129,239)	Apolipoprotein B.
APOC3	9913.ENSBTAP00000016453	0.439591957421644	0.35355029585798814	rgb(117,221,239)	Apolipoprotein C-III; Component of triglyceride-rich very low density lipoproteins (VLDL) and high density lipoproteins (HDL) in plasma. Plays a multifaceted role in triglyceride homeostasis. Intracellularly, promotes hepatic very low density lipoprotein 1 (VLDL1) assembly and secretion; extracellularly, attenuates hydrolysis and clearance of triglyceride-rich lipoproteins (TRLs). Impairs the lip…
APPL2	9913.ENSBTAP00000041069	0.49441159077468955	0.8674556213017752	rgb(239,120,117)	Adaptor protein, phosphotyrosine interaction, PH domain and leucine zipper containing 2.
ARHGAP23	9913.ENSBTAP00000056495	0.8808101714961561	0.6389940828402367	rgb(239,227,117)	Rho GTPase activating protein 23.
ARHGEF17	9913.ENSBTAP00000053483	0.6700473092844471	0.12349112426035504	rgb(117,153,239)	Rho guanine nucleotide exchange factor 17.
ASCC3	9913.ENSBTAP00000027294	0.1489946777054997	0.6507100591715977	rgb(239,132,117)	Activating signal cointegrator 1 complex subunit 3; 3'-5' DNA helicase involved in repair of alkylated DNA. Promotes DNA unwinding to generate single-stranded substrate needed for ALKBH3, enabling ALKBH3 to process alkylated N3-methylcytosine (3mC) within double-stranded regions. Part of the ASC-1 complex that enhances NF-kappa-B, SRF and AP1 transactivation.
ASPM	9913.ENSBTAP00000010340	0.34325842696629216	0.5282248520710059	rgb(117,239,124)	Abnormal spindle-like microcephaly-associated protein homolog; Probable role in mitotic spindle regulation and coordination of mitotic processes. May have a preferential role in regulating neurogenesis (By similarity).
ATP2B2	9913.ENSBTAP00000001723	0.5763749260792431	0.3871005917159763	rgb(239,155,117)	Calcium-transporting ATPase; This magnesium-dependent enzyme catalyzes the hydrolysis of ATP coupled with the transport of calcium.
ATP8B3	9913.ENSBTAP00000031534	0.8456830277942047	0.8264497041420119	rgb(239,127,117)	Phospholipid-transporting ATPase; Belongs to the cation transport ATPase (P-type) (TC 3.A.3) family. Type IV subfamily.
AZGP1	9913.ENSBTAP00000037042	0.2517149615612064	0.36153846153846153	rgb(117,174,239)	Zinc-alpha-2-glycoprotein; Stimulates lipid degradation in adipocytes and causes the extensive fat losses associated with some advanced cancers.
B2M	9913.ENSBTAP00000016359	0.4177705499704317	0.5111834319526628	rgb(117,239,212)	Beta-2-microglobulin; Component of the class I major histocompatibility complex (MHC). Involved in the presentation of peptide antigens to the immune system.
BCL2L2	9913.ENSBTAP00000026248	0.8398285038438794	0.24065088757396447	rgb(212,239,117)	Bcl-2-like protein 2; Promotes cell survival. Blocks dexamethasone-induced apoptosis. Mediates survival of postmitotic Sertoli cells by suppressing death-promoting activity of BAX (By similarity).
BNIP1	9913.ENSBTAP00000065854	0.09044943820224718	0.25822485207100593	rgb(117,117,239)	BCL2 interacting protein 1.
BRPF1	9913.ENSBTAP00000010224	0.45342992312241276	0.2113609467455621	rgb(117,239,201)	Bromodomain and PHD finger containing 1.
BRWD1	9913.ENSBTAP00000018087	0.1724127735068007	0.7561538461538462	rgb(117,239,227)	Bromodomain and WD repeat domain containing 1.
BST1	9913.ENSBTAP00000008097	0.34645180366646955	0.23692307692307696	rgb(117,239,239)	Bone marrow stromal cell antigen 1.
C1QC	9913.ENSBTAP00000014865	0.6029863985807216	0.4659171597633136	rgb(239,238,117)	Complement C1q C chain.
C1R	9913.ENSBTAP00000069754	0.672708456534595	0.44514792899408284	rgb(117,239,162)	Complement C1r; Belongs to the peptidase S1 family.
C29H11orf95	9913.ENSBTAP00000054235	0.1138675340035482	0.7092899408284025	rgb(117,177,239)	Chromosome 29 C11orf95 homolog.
C4BPA	9913.ENSBTAP00000073110	0.8515375517445299	0.92603550295858	rgb(155,239,117)	C4b-binding protein alpha chain; Controls the classical pathway of complement activation. It binds as a cofactor to C3b/C4b inactivator (C3bINA), which then hydrolyzes the complement fragment C4b. It also accelerates the degradation of the C4bC2a complex (C3 convertase) by dissociating the complement fragment C2a. Alpha chain binds C4b. It interacts also with serum amyloid P component.
C5	9913.ENSBTAP00000016204	0.5561502069781196	0.34928994082840237	rgb(117,239,117)	Complement C5a anaphylatoxin; Derived from proteolytic degradation of complement C5, C5 anaphylatoxin is a mediator of local inflammatory process. Binding to the receptor C5AR1 induces a variety of responses including intracellular calcium release, contraction of smooth muscle, increased vascular permeability, and histamine release from mast cells and basophilic leukocytes. C5a is also a potent c…
C9	9913.ENSBTAP00000021495	0.5433767001774099	0.39242603550295857	rgb(117,199,239)	Complement component C9; Constituent of the membrane attack complex (MAC) that plays a key role in the innate and adaptive immune response by forming pores in the plasma membrane of target cells. C9 is the pore-forming subunit of the MAC.
CACNA1A	9913.ENSBTAP00000019752	0.34804849201655824	0.6459171597633137	rgb(239,218,117)	Voltage-dependent P/Q-type calcium channel subunit alpha; Voltage-sensitive calcium channels (VSCC) mediate the entry of calcium ions into excitable cells and are also involved in a variety of calcium-dependent processes, including muscle contraction, hormone or neurotransmitter release, gene expression, cell motility, cell division and cell death. The isoform alpha-1A gives rise to P and/or Q- t…
CACNA1B	9913.ENSBTAP00000045932	0.3512418687167357	0.6065088757396451	rgb(239,141,117)	Voltage-dependent N-type calcium channel subunit alpha; Voltage-sensitive calcium channels (VSCC) mediate the entry of calcium ions into excitable cells and are also involved in a variety of calcium-dependent processes, including muscle contraction, hormone or neurotransmitter release, gene expression, cell motility, cell division and cell death. The isoform alpha-1B gives rise to N-type calcium …
CACNA1C	9913.ENSBTAP00000014104	0.39169130691898285	0.7071597633136095	rgb(117,239,153)	Voltage-dependent L-type calcium channel subunit alpha; Voltage-sensitive calcium channels (VSCC) mediate the entry of calcium ions into excitable cells and are also involved in a variety of calcium-dependent processes, including muscle contraction, hormone or neurotransmitter release, gene expression, cell motility, cell division and cell death; Belongs to the calcium channel alpha-1 subunit (TC…
CACNA1F	9913.ENSBTAP00000021433	0.3975458308693081	0.6693491124260356	rgb(239,191,117)	Voltage-dependent L-type calcium channel subunit alpha; Voltage-sensitive calcium channels (VSCC) mediate the entry of calcium ions into excitable cells and are also involved in a variety of calcium-dependent processes, including muscle contraction, hormone or neurotransmitter release, gene expression, cell motility, cell division and cell death; Belongs to the calcium channel alpha-1 subunit (TC…
CAPN14	9913.ENSBTAP00000021091	0.1607037256061502	0.4925443786982248	rgb(239,195,117)	Calpain 14; Belongs to the peptidase C2 family.
CARNS1	9913.ENSBTAP00000023529	0.8105558840922532	0.16449704142011834	rgb(117,117,239)	Carnosine synthase 1.
CASD1	9913.ENSBTAP00000067453	0.6524837374334714	0.9143195266272189	rgb(232,239,117)	CAS1 domain containing 1.
CAT	9913.ENSBTAP00000074355	0.921791839148433	0.11763313609467457	rgb(117,161,239)	Catalase; Occurs in almost all aerobically respiring organisms and serves to protect cells from the toxic effects of hydrogen peroxide. Promotes growth of cells.
CC2D2A	9913.ENSBTAP00000055063	0.6998521584861029	0.3514201183431953	rgb(168,239,117)	Coiled-coil and C2 domain containing 2A.
CCDC114	9913.ENSBTAP00000040922	0.2921643997634536	0.7471005917159764	rgb(117,239,221)	Coiled-coil domain containing 114.
CCDC14	9913.ENSBTAP00000000740	0.49441159077468955	0.44568047337278105	rgb(117,239,138)	Coiled-coil domain containing 14.
CCDC30-2	9913.ENSBTAP00000065031	0.8983737433471319	0.6624260355029586	rgb(117,239,216)	WD_REPEATS_REGION domain-containing protein.
CCDC8	9913.ENSBTAP00000024194	0.6115020697811946	0.8440236686390533	rgb(117,239,121)	Coiled-coil domain containing 8.
CD5L	9913.ENSBTAP00000052573	0.1372856298048492	0.8791715976331361	rgb(117,239,188)	CD5 molecule like.
CDAN1	9913.ENSBTAP00000007561	0.225103489059728	0.6097041420118344	rgb(239,168,117)	Codanin 1.
CEP104	9913.ENSBTAP00000056801	0.6290656416321704	0.8908875739644971	rgb(117,132,239)	Centrosomal protein 104.
CEP170B	9913.ENSBTAP00000006305	0.23095801301005325	0.7502958579881657	rgb(117,239,238)	Centrosomal protein 170B.
CGN1	9913.ENSBTAP00000003773	0.4183027794204613	0.703431952662722	rgb(171,239,117)	Conglutinin; Calcium-dependent lectin-like protein which binds to a yeast cell wall extract and immune complexes through the complement component (C3bi). It is capable of binding non-reducing terminal N- acetylglucosamine, mannose, and fucose residues.
CIC	9913.ENSBTAP00000054105	0.1138675340035482	0.7854437869822486	rgb(117,232,239)	Capicua transcriptional repressor.
CILK1	9913.ENSBTAP00000020711	0.6876108811354228	0.17035502958579882	rgb(117,239,180)	Intestinal cell kinase.
CKLF	9913.ENSBTAP00000049197	0.3129213483146067	0.8733136094674556	rgb(117,117,239)	Chemokine like factor.
CLU	9913.ENSBTAP00000007324	0.48908929627439385	0.3812426035502959	rgb(117,202,239)	Clusterin alpha chain; Functions as extracellular chaperone that prevents aggregation of non native proteins. Prevents stress-induced aggregation of blood plasma proteins. Inhibits formation of amyloid fibrils by APP, APOC2, B2M, CALCA, CSN3, SNCA and aggregation-prone LYZ variants (in vitro). Does not require ATP. Maintains partially unfolded proteins in a state appropriate for subsequent refold…
COL12A1	9913.ENSBTAP00000026725	0.37146658781785924	0.542603550295858	rgb(198,239,117)	Collagen alpha-1(XII) chain.
COL18A1	9913.ENSBTAP00000034542	0.14314015375517447	0.8323076923076924	rgb(134,239,117)	Collagen type XVIII alpha 1 chain.
COL28A1	9913.ENSBTAP00000062228	0.14314015375517447	0.902603550295858	rgb(117,197,239)	Collagen type XXVIII alpha 1 chain.
COL6A1	9913.ENSBTAP00000015668	0.45342992312241276	0.5575147928994084	rgb(239,233,117)	Collagen type VI alpha 1 chain.
COL6A5	9913.ENSBTAP00000060400	0.4443820224719101	0.530887573964497	rgb(235,239,117)	Collagen type VI alpha 5 chain.
CRYBG1	9913.ENSBTAP00000068722	0.08459491425192195	0.8557396449704142	rgb(230,239,117)	Crystallin beta-gamma domain containing 1; Belongs to the beta/gamma-crystallin family.
CSMD2	9913.ENSBTAP00000007609	0.225103489059728	0.37538461538461537	rgb(135,239,117)	CUB and Sushi multiple domains 2.
CSTA	9913.ENSBTAP00000014138	0.8105558840922532	0.18792899408284025	rgb(117,223,239)	Cystatin-A; This is an intracellular thiol proteinase inhibitor; Belongs to the cystatin family.
CTC1	9913.ENSBTAP00000042139	0.587551744529864	0.6714792899408285	rgb(186,239,117)	CST telomere replication complex component 1.
CUL3	9913.ENSBTAP00000029018	0.664192785334122	0.2789940828402367	rgb(209,239,117)	Cullin 3; Belongs to the cullin family.
CUX1	9913.ENSBTAP00000070582	0.8456830277942047	0.08834319526627218	rgb(167,239,117)	Homeobox protein cut-like.
CXADR	9913.ENSBTAP00000057482	0.10801301005322295	0.3988165680473373	rgb(117,182,239)	Coxsackievirus and adenovirus receptor homolog; Component of the epithelial apical junction complex that may function as a homophilic cell adhesion molecule and is essential for tight junction integrity. Also involved in transepithelial migration of leukocytes through adhesive interactions with JAML a transmembrane protein of the plasma membrane of leukocytes. The interaction between both recepto…
DAP	9913.ENSBTAP00000008327	0.2895032525133058	0.7913017751479291	rgb(117,117,239)	Death-associated protein 1; Negative regulator of autophagy. Involved in mediating interferon-gamma-induced cell death (By similarity).
DCP1A	9913.ENSBTAP00000014415	0.5923418095801302	0.53301775147929	rgb(117,239,192)	Decapping mRNA 1A.
DENND5B	9913.ENSBTAP00000027075	0.2602306327616795	0.8498816568047338	rgb(239,133,117)	DENN domain containing 5B.
DGCR8	9913.ENSBTAP00000057457	0.10801301005322295	0.6272781065088757	rgb(158,239,117)	Microprocessor complex subunit DGCR8; Component of the microprocessor complex that acts as a RNA- and heme-binding protein that is involved in the initial step of microRNA (miRNA) biogenesis. Component of the microprocessor complex that is required to process primary miRNA transcripts (pri-miRNAs) to release precursor miRNA (pre-miRNA) in the nucleus. Within the microprocessor complex, DGCR8 func…
DHX29	9913.ENSBTAP00000013897	0.318775872264932	0.8147337278106509	rgb(117,239,147)	ATP-dependent RNA helicase DHX29; ATP-binding RNA helicase involved in translation initiation. Part of the 43S pre-initiation complex that is required for efficient initiation on mRNAs of higher eukaryotes with structured 5'-UTRs by promoting efficient NTPase-dependent 48S complex formation. Specifically binds to the 40S ribosome near the mRNA entrance. Does not possess a processive helicase acti…
DIAPH2	9913.ENSBTAP00000072562	0.6115020697811946	0.08248520710059172	rgb(117,239,185)	Uncharacterized protein.
DIP2A	9913.ENSBTAP00000074032	0.1607037256061502	0.92603550295858	rgb(117,141,239)	Disco interacting protein 2 homolog A.
DKK4	9913.ENSBTAP00000000277	0.459284447072738	0.5276923076923077	rgb(239,203,117)	Dickkopf WNT signaling pathway inhibitor 4.
DMXL1	9913.ENSBTAP00000068906	0.08459491425192195	0.8323076923076924	rgb(117,138,239)	Dmx like 1.
DNAH11	9913.ENSBTAP00000053699	0.2836487285629805	0.7066272189349113	rgb(239,239,117)	Dynein axonemal heavy chain 11.
DNAH12	9913.ENSBTAP00000066277	0.5529568302779421	0.09420118343195266	rgb(238,239,117)	Dynein heavy chain 12, axonemal.
DNAH3	9913.ENSBTAP00000024702	0.49441159077468955	0.8440236686390533	rgb(117,119,239)	Dynein axonemal heavy chain 3.
DNAH8	9913.ENSBTAP00000018689	0.1724127735068007	0.5159763313609468	rgb(239,189,117)	Dynein axonemal heavy chain 8.
DNAJB1	9913.ENSBTAP00000036132	0.1372856298048492	0.44568047337278105	rgb(239,221,117)	DnaJ homolog subfamily B member 1; Interacts with HSP70 and can stimulate its ATPase activity. Stimulates the association between HSC70 and HIP. Negatively regulates heat shock-induced HSF1 transcriptional activity during the attenuation and recovery phase period of the heat shock response. Stimulates ATP hydrolysis and the folding of unfolded proteins mediated by HSPA1A/B (in vitro).
DNAJC13	9913.ENSBTAP00000003865	0.29535777646363104	0.3519526627218935	rgb(117,239,207)	DnaJ heat shock protein family (Hsp40) member C13.
DOC2B	9913.ENSBTAP00000035058	0.6700473092844471	0.14692307692307693	rgb(117,212,239)	Double C2-like domain-containing protein.
DOCK4	9913.ENSBTAP00000074559	0.921791839148433	0.4925443786982248	rgb(126,239,117)	Dedicator of cytokinesis 4; Belongs to the DOCK family.
DPPA2	9913.ENSBTAP00000027264	0.1489946777054997	0.6741420118343195	rgb(195,239,117)	SAP domain-containing protein.
DSPP	9913.ENSBTAP00000054907	0.1138675340035482	0.5159763313609468	rgb(117,152,239)	Dentin sialophosphoprotein.
DST-2	9913.ENSBTAP00000074367	0.921791839148433	0.3812426035502959	rgb(117,239,179)	Uncharacterized protein.
DUSP5	9913.ENSBTAP00000027029	0.8398285038438794	0.6624260355029586	rgb(117,146,239)	Dual specificity protein phosphatase; Belongs to the protein-tyrosine phosphatase family. Non- receptor class dual specificity subfamily.
DYNC1H1	9913.ENSBTAP00000070205	0.287906564163217	0.6384615384615385	rgb(182,239,117)	Dynein cytoplasmic 1 heavy chain 1.
EFNA3	9913.ENSBTAP00000026958	0.6343879361324661	0.6235502958579883	rgb(239,167,117)	Ephrin RBD domain-containing protein; Belongs to the ephrin family.
ENPEP	9913.ENSBTAP00000010972	0.19583086930810173	0.457396449704142	rgb(117,239,141)	Glutamyl aminopeptidase; Regulates central hypertension through its calcium-modulated preference to cleave N-terminal acidic residues from peptides such as angiotensin II; Belongs to the peptidase M1 family.
ENSBTAP00000058812	9913.ENSBTAP00000058812	0.6130987581312833	0.4249112426035503	rgb(117,117,239)	Uncharacterized protein.
ENSBTAP00000059753	9913.ENSBTAP00000059753	0.6977232406859847	0.511715976331361	rgb(117,117,239)	Uncharacterized protein.
ENSBTAP00000060305	9913.ENSBTAP00000060305	0.7456238911886458	0.5580473372781066	rgb(239,209,117)	IGv domain-containing protein.
ENSBTAP00000060774	9913.ENSBTAP00000060774	0.7450916617386163	0.6379289940828403	rgb(239,200,117)	Ig-like domain-containing protein.
ENSBTAP00000061517	9913.ENSBTAP00000061517	0.7041099940863396	0.5905325443786983	rgb(117,117,239)	Ig-like domain-containing protein.
ENSBTAP00000062433	9913.ENSBTAP00000062433	0.6700473092844471	0.10005917159763314	rgb(117,117,239)	DUF4211 domain-containing protein.
ENSBTAP00000062644	9913.ENSBTAP00000062644	0.8983737433471319	0.20550295857988166	rgb(138,239,117)	Ig-like domain-containing protein.
ENSBTAP00000064659	9913.ENSBTAP00000064659	0.8983737433471319	0.4222485207100592	rgb(117,135,239)	Ig-like domain-containing protein.
ENSBTAP00000065308	9913.ENSBTAP00000065308	0.09044943820224718	0.7385798816568048	rgb(121,239,117)	Uncharacterized protein.
ENSBTAP00000065380	9913.ENSBTAP00000065380	0.09044943820224718	0.6858579881656806	rgb(117,170,239)	Uncharacterized protein.
ENSBTAP00000065677	9913.ENSBTAP00000065677	0.20541099940863394	0.599585798816568	rgb(117,117,239)	RING-type domain-containing protein.
ENSBTAP00000066744	9913.ENSBTAP00000066744	0.9042282672974572	0.7092899408284025	rgb(239,159,117)	Uncharacterized protein.
ENSBTAP00000068198	9913.ENSBTAP00000068198	0.4768480189237138	0.9143195266272189	rgb(117,239,129)	Uncharacterized protein.
ENSBTAP00000069968	9913.ENSBTAP00000069968	0.6987876995860438	0.5415384615384615	rgb(226,239,117)	Ig-like domain-containing protein.
ENSBTAP00000071213	9913.ENSBTAP00000071213	0.07874039030159669	0.44568047337278105	rgb(117,239,233)	Ig-like domain-containing protein.
ENSBTAP00000071723	9913.ENSBTAP00000071723	0.4933471318746304	0.7066272189349113	rgb(117,239,230)	Uncharacterized protein.
ENSBTAP00000072499	9913.ENSBTAP00000072499	0.07874039030159669	0.3402366863905325	rgb(117,117,239)	Uncharacterized protein.
ENSBTAP00000072865	9913.ENSBTAP00000072865	0.7285925487876997	0.08248520710059172	rgb(117,117,239)	Uncharacterized protein.
EP400	9913.ENSBTAP00000027216	0.1489946777054997	0.7327218934911244	rgb(117,117,239)	E1A binding protein p400.
EPB41L1	9913.ENSBTAP00000002151	0.5763749260792431	0.36366863905325447	rgb(117,206,239)	Erythrocyte membrane protein band 4.1 like 1.
EPHA1	9913.ENSBTAP00000071119	0.5391188645771733	0.6379289940828403	rgb(117,239,176)	EPH receptor A1.
EPHA2	9913.ENSBTAP00000001080	0.5620047309284447	0.5894674556213019	rgb(117,239,132)	EPH receptor A2.
EPPK1	9913.ENSBTAP00000058073	0.10801301005322295	0.11763313609467457	rgb(117,117,239)	Epiplakin 1.
ERC1	9913.ENSBTAP00000071004	0.07874039030159669	0.8908875739644971	rgb(117,239,118)	ELKS/RAB6-interacting/CAST family member 1.
F10	9913.ENSBTAP00000021789	0.5417800118273212	0.4898816568047337	rgb(239,149,117)	Activated factor Xa heavy chain; Factor Xa is a vitamin K-dependent glycoprotein that converts prothrombin to thrombin in the presence of factor Va, calcium and phospholipid during blood clotting; Belongs to the peptidase S1 family.
F13B	9913.ENSBTAP00000020163	0.34219396806623303	0.2960355029585799	rgb(239,171,117)	Coagulation factor XIII, B polypeptide.
F1MLW7_BOVIN	9913.ENSBTAP00000031165	0.8456830277942047	0.715147928994083	rgb(239,130,117)	Ig-like domain-containing protein.
FAM227A-2	9913.ENSBTAP00000061256	0.8281194559432289	0.902603550295858	rgb(117,117,239)	Uncharacterized protein.
FAT4	9913.ENSBTAP00000013316	0.804701360141928	0.7795857988165681	rgb(239,183,117)	FAT atypical cadherin 4.
FBN1	9913.ENSBTAP00000064428	0.4539621525724423	0.5942603550295859	rgb(239,236,117)	Fibrillin-1; [Fibrillin-1]: Structural component of the 10-12 nm diameter microfibrils of the extracellular matrix, which conveys both structural and regulatory properties to load-bearing connective tissues. Fibrillin-1-containing microfibrils provide long-term force bearing structural support. In tissues such as the lung, blood vessels and skin, microfibrils form the periphery of the elastic fib…
FBN2	9913.ENSBTAP00000020360	0.5007983441750444	0.6208875739644971	rgb(117,158,239)	Fibrillin 2.
FBN3	9913.ENSBTAP00000057208	0.5705204021289179	0.8908875739644971	rgb(239,170,117)	Fibrillin 3.
FBXL19	9913.ENSBTAP00000062981	0.8983737433471319	0.2757988165680474	rgb(117,229,239)	F-box and leucine rich repeat protein 19.
FETUB	9913.ENSBTAP00000023309	0.38796570076877585	0.29017751479289944	rgb(239,207,117)	Fetuin-B; Protease inhibitor required for egg fertilization. Required to prevent premature zona pellucida hardening before fertilization, probably by inhibiting the protease activity of ASTL, a protease that mediates the cleavage of ZP2 and triggers zona pellucida hardening (By similarity).
FGA	9913.ENSBTAP00000002145	0.4097871082199882	0.3077514792899408	rgb(239,158,117)	Fibrinogen alpha chain; Cleaved by the protease thrombin to yield monomers which, together with fibrinogen beta (FGB) and fibrinogen gamma (FGG), polymerize to form an insoluble fibrin matrix. Fibrin has a major function in hemostasis as one of the primary components of blood clots. In addition, functions during the early stages of wound repair to stabilize the lesion and guide cell migration dur…
FGB	9913.ENSBTAP00000067912	0.3911590774689533	0.38071005917159767	rgb(117,120,239)	Fibrinogen beta chain; Cleaved by the protease thrombin to yield monomers which, together with fibrinogen alpha (FGA) and fibrinogen gamma (FGG), polymerize to form an insoluble fibrin matrix. Fibrin has a major function in hemostasis as one of the primary components of blood clots. In addition, functions during the early stages of wound repair to stabilize the lesion and guide cell migration dur…
FGFRL1	9913.ENSBTAP00000039238	0.804701360141928	0.14106508875739646	rgb(117,117,239)	Fibroblast growth factor receptor like 1.
FGG	9913.ENSBTAP00000008877	0.3735955056179775	0.34875739644970416	rgb(117,144,239)	Fibrinogen gamma-B chain; Together with fibrinogen alpha (FGA) and fibrinogen beta (FGB), polymerizes to form an insoluble fibrin matrix. Has a major function in hemostasis as one of the primary components of blood clots. In addition, functions during the early stages of wound repair to stabilize the lesion and guide cell migration during re- epithelialization. Was originally thought to be essent…
FMO5	9913.ENSBTAP00000014385	0.6700473092844471	0.8205917159763314	rgb(239,224,117)	Dimethylaniline monooxygenase [N-oxide-forming].
FN1	9913.ENSBTAP00000010925	0.5204908338261384	0.47017751479289943	rgb(161,239,117)	Fibronectin; Fibronectins bind cell surfaces and various compounds including collagen, fibrin, heparin, DNA, and actin. Fibronectins are involved in cell adhesion, cell motility, opsonization, wound healing, and maintenance of cell shape. Involved in osteoblast compaction through the fibronectin fibrillogenesis cell-mediated matrix assembly process, essential for osteoblast mineralization. Partic…
FN3KRP	9913.ENSBTAP00000020456	0.49441159077468955	0.17035502958579882	rgb(173,239,117)	Fructosamine 3 kinase related protein; Belongs to the fructosamine kinase family.
FNIP2	9913.ENSBTAP00000070282	0.34219396806623303	0.09420118343195266	rgb(224,239,117)	Folliculin interacting protein 2.
FRMPD3	9913.ENSBTAP00000004058	0.42415730337078655	0.2875147928994083	rgb(117,137,239)	FERM and PDZ domain containing 3.
G3MX06_BOVIN	9913.ENSBTAP00000054064	0.1138675340035482	0.8088757396449705	rgb(185,239,117)	Ig-like domain-containing protein.
G3N0V0_BOVIN	9913.ENSBTAP00000055469	0.6359846244825548	0.5761538461538462	rgb(239,165,117)	Uncharacterized protein.
G3N188_BOVIN	9913.ENSBTAP00000055618	0.7019810762862213	0.6219526627218936	rgb(239,235,117)	Ig-like domain-containing protein.
G3N342_BOVIN	9913.ENSBTAP00000056315	0.7961856889414549	0.6043786982248521	rgb(117,239,204)	Uncharacterized protein.
G5E5V1_BOVIN	9913.ENSBTAP00000032915	0.6945298639858073	0.6720118343195267	rgb(117,239,139)	Ig-like domain-containing protein.
G5E604_BOVIN	9913.ENSBTAP00000046041	0.8632465996451805	0.5101183431952663	rgb(120,239,117)	Ig-like domain-containing protein.
G5E6L5_BOVIN	9913.ENSBTAP00000055652	0.248521584861029	0.12349112426035504	rgb(117,149,239)	Uncharacterized protein.
GABBR1	9913.ENSBTAP00000022907	0.5417800118273212	0.26727810650887573	rgb(239,144,117)	Gamma-aminobutyric acid type B receptor subunit 1.
GCNT3	9913.ENSBTAP00000012427	0.7285925487876997	0.8088757396449705	rgb(218,239,117)	Beta-1,3-galactosyl-O-glycosyl-glycoprotein beta-1,6-N-acetylglucosaminyltransferase 3; Glycosyltransferase that can synthesize all known mucin beta 6 N-acetylglucosaminides. Mediates core 2 and core 4 O-glycan branching, 2 important steps in mucin-type biosynthesis. Has also I- branching enzyme activity by converting linear into branched poly-N- acetyllactosaminoglycans, leading to introduce the…
GID4	9913.ENSBTAP00000011595	0.6349201655824956	0.1996449704142012	rgb(143,239,117)	GID complex subunit 4 homolog.
GMIP	9913.ENSBTAP00000020147	0.16655824955647547	0.3871005917159763	rgb(117,117,239)	GEM interacting protein.
GMPPB	9913.ENSBTAP00000015403	0.17826729745712594	0.18792899408284025	rgb(117,140,239)	Mannose-1-phosphate guanyltransferase beta; Catalyzes the formation of GDP-mannose, an essential precursor of glycan moieties of glycoproteins and glycolipids.
GSDMB	9913.ENSBTAP00000017083	0.201685393258427	0.8264497041420119	rgb(180,239,117)	Gasdermin B.
HABP4	9913.ENSBTAP00000015392	0.17826729745712594	0.30508875739644975	rgb(239,232,117)	Hyaluronan binding protein 4.
HAL	9913.ENSBTAP00000065003	0.8983737433471319	0.44568047337278105	rgb(101,199,255)	Histidine ammonia-lyase.
HCN4	9913.ENSBTAP00000023219	0.5529568302779421	0.16449704142011834	rgb(117,239,150)	Hyperpolarization activated cyclic nucleotide gated potassium channel 4.
HERC6	9913.ENSBTAP00000027362	0.2416026020106446	0.6187573964497043	rgb(117,117,239)	HECT and RLD domain containing E3 ubiquitin protein ligase family member 6.
HHIP	9913.ENSBTAP00000021390	0.23681253696037852	0.17035502958579882	rgb(239,229,117)	Hedgehog interacting protein.
HIPK4	9913.ENSBTAP00000051851	0.804701360141928	0.8791715976331361	rgb(165,239,117)	Homeodomain interacting protein kinase 4.
HNRNPH1	9913.ENSBTAP00000074169	0.49441159077468955	0.07662721893491124	rgb(117,239,210)	Heterogeneous nuclear ribonucleoprotein H1.
HP	9913.ENSBTAP00000071329	0.3336782968657599	0.39402366863905325	rgb(197,239,117)	Haptoglobin alpha chain; As a result of hemolysis, hemoglobin is found to accumulate in the kidney and is secreted in the urine. Haptoglobin captures, and combines with free plasma hemoglobin to allow hepatic recycling of heme iron and to prevent kidney damage. Haptoglobin also acts as an antioxidant, has antibacterial activity and plays a role in modulating many aspects of the acute phase respon…
HPX	9913.ENSBTAP00000004635	0.30706682436428145	0.3642011834319527	rgb(179,239,117)	Hemopexin; Binds heme and transports it to the liver for breakdown and iron recovery, after which the free hemopexin returns to the circulation.
HTRA2	9913.ENSBTAP00000026804	0.8398285038438794	0.44568047337278105	rgb(117,239,222)	Serine protease HTRA2, mitochondrial; Serine protease that shows proteolytic activity against a non-specific substrate beta-casein. Promotes or induces cell death either by direct binding to and inhibition of BIRC proteins (also called inhibitor of apoptosis proteins, IAPs), leading to an increase in caspase activity, or by a BIRC inhibition-independent, caspase- independent and serine protease a…
HUWE1	9913.ENSBTAP00000008060	0.287906564163217	0.6757396449704143	rgb(236,239,117)	HECT, UBA and WWE domain containing E3 ubiquitin protein ligase 1.
IGFLR1	9913.ENSBTAP00000057282	0.45342992312241276	0.8908875739644971	rgb(117,239,236)	IGF-like family receptor 1; Probable cell membrane receptor for the IGF-like family protein IGFL.
INF2	9913.ENSBTAP00000012349	0.7988468361916027	0.592130177514793	rgb(117,239,198)	Uncharacterized protein.
INKA1	9913.ENSBTAP00000016348	0.4007392075694855	0.18792899408284025	rgb(117,239,168)	Inka box actin regulator 1.
INTS2	9913.ENSBTAP00000016011	0.28630987581312833	0.2880473372781065	rgb(117,226,239)	Integrator complex subunit 2.
INTS3	9913.ENSBTAP00000008186	0.25437610881135425	0.3285207100591716	rgb(233,239,117)	Integrator complex subunit 3.
INTS6	9913.ENSBTAP00000003868	0.31611472501478416	0.3285207100591716	rgb(117,239,206)	Integrator complex subunit 6.
IQSEC3	9913.ENSBTAP00000025372	0.3539030159668835	0.16449704142011834	rgb(117,117,239)	IQ motif and Sec7 domain 3.
ITGAE	9913.ENSBTAP00000020307	0.16655824955647547	0.2816568047337278	rgb(239,164,117)	Integrin subunit alpha E; Belongs to the integrin alpha chain family.
ITGB4	9913.ENSBTAP00000074469	0.564133648728563	0.45313609467455623	rgb(239,118,117)	Integrin beta.
ITIH1	9913.ENSBTAP00000010318	0.23095801301005325	0.80301775147929	rgb(117,209,239)	Inter-alpha-trypsin inhibitor heavy chain H1; May act as a carrier of hyaluronan in serum or as a binding protein between hyaluronan and other matrix protein, including those on cell surfaces in tissues to regulate the localization, synthesis and degradation of hyaluronan which are essential to cells undergoing biological processes.
ITIH2	9913.ENSBTAP00000018701	0.5673270254287405	0.4169230769230769	rgb(117,117,239)	Inter-alpha-trypsin inhibitor heavy chain H2.
JAKMIP3	9913.ENSBTAP00000066345	0.7871377882909522	0.09420118343195266	rgb(239,177,117)	Janus kinase and microtubule interacting protein 3.
JRKL	9913.ENSBTAP00000051509	0.8691011235955057	0.18207100591715975	rgb(117,239,170)	JRK like.
KCNJ5	9913.ENSBTAP00000073898	0.4965405085748078	0.26568047337278106	rgb(117,239,203)	G protein-activated inward rectifier potassium channel 4; This potassium channel is controlled by G proteins. Inward rectifier potassium channels are characterized by a greater tendency to allow potassium to flow into the cell rather than out of it. Their voltage dependence is regulated by the concentration of extracellular potassium; as external potassium is raised, the voltage range of the chan…
KCNQ3	9913.ENSBTAP00000027546	0.1489946777054997	0.25822485207100593	rgb(117,227,239)	Potassium voltage-gated channel subfamily KQT member 3; Associates with KCNQ2 or KCNQ5 to form a potassium channel with essentially identical properties to the channel underlying the native M-current, a slowly activating and deactivating potassium conductance which plays a critical role in determining the subthreshold electrical excitability of neurons as well as the responsiveness to synaptic in…
KHDC3L	9913.ENSBTAP00000070542	0.4007392075694855	0.09420118343195266	rgb(239,204,117)	KH domain containing 3 like, subcortical maternal complex member.
KIAA1109	9913.ENSBTAP00000070593	0.9100827912477825	0.35781065088757397	rgb(117,239,173)	FSA_C domain-containing protein.
KIF16B	9913.ENSBTAP00000058862	0.8456830277942047	0.11177514792899408	rgb(127,239,117)	Kinesin family member 16B; Belongs to the TRAFAC class myosin-kinesin ATPase superfamily. Kinesin family.
KIF2A	9913.ENSBTAP00000055986	0.7871377882909522	0.11763313609467457	rgb(117,117,239)	Kinesin-like protein KIF2A; Plus end-directed microtubule-dependent motor required for normal brain development. May regulate microtubule dynamics during axonal growth. Required for normal progression through mitosis. Required for normal congress of chromosomes at the metaphase plate. Required for normal spindle dynamics during mitosis. Promotes spindle turnover. Implicated in formation of bipola…
KIN	9913.ENSBTAP00000053570	0.8749556475458309	0.31094674556213014	rgb(117,117,239)	Kin17 DNA and RNA binding protein.
KNG1	9913.ENSBTAP00000048995	0.3539030159668835	0.49520710059171597	rgb(124,239,117)	Kininogen-1 heavy chain; (1) Kininogens are inhibitors of thiol proteases; (2) HMW- kininogen plays an important role in blood coagulation by helping to position optimally prekallikrein and factor XI next to factor XII; (3) HMW-kininogen inhibits the thrombin- and plasmin-induced aggregation of thrombocytes; (4) the active peptide bradykinin that is released from HMW-kininogen shows a variety of …
KRT42	9913.ENSBTAP00000059957	0.6115020697811946	0.10591715976331362	rgb(202,239,117)	Keratin 42; Belongs to the intermediate filament family.
LAG3	9913.ENSBTAP00000066027	0.225103489059728	0.10005917159763314	rgb(117,196,239)	Lymphocyte activating 3.
LIMS2	9913.ENSBTAP00000058058	0.10801301005322295	0.2816568047337278	rgb(239,176,117)	LIM and senescent cell antigen-like-containing domain protein 2; Adapter protein in a cytoplasmic complex linking beta- integrins to the actin cytoskeleton, bridges the complex to cell surface receptor tyrosine kinases and growth factor receptors.
LNPK	9913.ENSBTAP00000065567	0.09044943820224718	0.6624260355029586	rgb(117,134,239)	Lunapark, ER junction formation factor.
LOC100138645	9913.ENSBTAP00000001383	0.5997930218805442	0.4984023668639053	rgb(117,239,177)	Amine oxidase.
LOC100294723	9913.ENSBTAP00000074118	0.07288586635127145	0.14106508875739646	rgb(117,179,239)	C-type lectin domain-containing protein.
LOC100300716	9913.ENSBTAP00000055719	0.6359846244825548	0.5010650887573964	rgb(188,239,117)	Ig-like domain-containing protein.
LOC100847119	9913.ENSBTAP00000041616	0.6519515079834418	0.6576331360946746	rgb(117,239,151)	Uncharacterized protein.
LOC100848700	9913.ENSBTAP00000058914	0.8866646954464814	0.5628402366863906	rgb(117,164,239)	Uncharacterized protein.
LOC506828	9913.ENSBTAP00000037567	0.27193968066233	0.14692307692307693	rgb(117,239,225)	Uncharacterized protein.
LOC507550	9913.ENSBTAP00000051075	0.7285925487876997	0.12934911242603553	rgb(117,239,157)	Uncharacterized protein.
LOC510536	9913.ENSBTAP00000032679	0.8456830277942047	0.8498816568047338	rgb(117,235,239)	Uncharacterized protein.
LOC510860	9913.ENSBTAP00000033374	0.7285925487876997	0.8557396449704142	rgb(215,239,117)	C4b-binding protein alpha-like.
LOC511240	9913.ENSBTAP00000040954	0.5529568302779421	0.8674556213017752	rgb(117,117,239)	Protein HP-25 homolog 1.
LOC530348	9913.ENSBTAP00000070605	0.9100827912477825	0.46911242603550296	rgb(156,239,117)	Uncharacterized protein.
LOC536660	9913.ENSBTAP00000035589	0.37146658781785924	0.8615976331360947	rgb(117,131,239)	Phospholipid-transporting ATPase; Belongs to the cation transport ATPase (P-type) (TC 3.A.3) family. Type IV subfamily.
LOC618947	9913.ENSBTAP00000054612	0.1138675340035482	0.5394082840236687	rgb(117,117,239)	Uncharacterized protein.
LOC782698	9913.ENSBTAP00000019371	0.6290656416321704	0.1762130177514793	rgb(117,239,183)	Olfactory receptor.
LOC788512	9913.ENSBTAP00000069046	0.08459491425192195	0.2113609467455621	rgb(239,180,117)	Olfactory receptor.
LOC788939	9913.ENSBTAP00000054140	0.1138675340035482	0.7620118343195267	rgb(117,117,239)	Olfactory receptor.
LOC789817	9913.ENSBTAP00000073151	0.7929923122412774	0.92603550295858	rgb(149,239,117)	Olfactory receptor.
LRBA	9913.ENSBTAP00000066900	0.9042282672974572	0.8147337278106509	rgb(117,117,239)	LPS responsive beige-like anchor protein.
LRIG3	9913.ENSBTAP00000002883	0.6817563571850976	0.3343786982248521	rgb(147,239,117)	Leucine rich repeats and immunoglobulin like domains 3.
LRP12	9913.ENSBTAP00000067824	0.5353932584269663	0.9143195266272189	rgb(117,147,239)	LDL receptor related protein 12.
LRP2	9913.ENSBTAP00000005988	0.44651094027202837	0.2694082840236687	rgb(117,143,239)	LDL receptor related protein 2.
LTBP2	9913.ENSBTAP00000029274	0.7658486102897694	0.2853846153846154	rgb(117,217,239)	Latent-transforming growth factor beta-binding protein 2; May play an integral structural role in elastic-fiber architectural organization and/or assembly. Belongs to the LTBP family.
LUM	9913.ENSBTAP00000002279	0.37838557066824363	0.5734911242603551	rgb(239,136,117)	Lumican; Belongs to the small leucine-rich proteoglycan (SLRP) family. SLRP class II subfamily.
LYN	9913.ENSBTAP00000026686	0.7711709047900651	0.4584615384615385	rgb(117,150,239)	Tyrosine-protein kinase.
M1AP	9913.ENSBTAP00000009183	0.2075399172087522	0.6389940828402367	rgb(117,180,239)	Meiosis 1 associated protein.
MAN2C1	9913.ENSBTAP00000009690	0.201685393258427	0.2113609467455621	rgb(223,239,117)	Mannosidase alpha class 2C member 1.
MAP2K7	9913.ENSBTAP00000014063	0.5705204021289179	0.18792899408284025	rgb(117,233,239)	Mitogen-activated protein kinase kinase 7.
MAP3K5	9913.ENSBTAP00000011949	0.7520106445890006	0.1996449704142012	rgb(117,215,239)	Mitogen-activated protein kinase kinase kinase 5.
MARCHF6	9913.ENSBTAP00000036510	0.1372856298048492	0.3285207100591716	rgb(176,239,117)	Membrane associated ring-CH-type finger 6.
MAST1	9913.ENSBTAP00000007991	0.6349201655824956	0.22307692307692312	rgb(178,171,0)	Microtubule associated serine/threonine kinase 1.
MDC1	9913.ENSBTAP00000035767	0.8281194559432289	0.6746745562130179	rgb(203,239,117)	Mediator of DNA damage checkpoint 1.
METTL16	9913.ENSBTAP00000035031	0.49441159077468955	0.14692307692307693	rgb(117,117,239)	Methyltransferase like 16.
MFN2	9913.ENSBTAP00000070841	0.33633944411590777	0.9201775147928994	rgb(117,117,239)	Mitofusin 2; Belongs to the TRAFAC class dynamin-like GTPase superfamily. Dynamin/Fzo/YdjA family.
MGC137211	9913.ENSBTAP00000024695	0.35869308101714964	0.2608875739644971	rgb(14,178,0)	Protein HP-25 homolog 2.
MICAL2	9913.ENSBTAP00000058159	0.30706682436428145	0.11763313609467457	rgb(117,239,142)	[F-actin]-monooxygenase MICAL2; Nuclear monooxygenase that promotes depolymerization of F- actin by mediating oxidation of specific methionine residues on actin to form methionine-sulfoxide, resulting in actin filament disassembly and preventing repolymerization (By similarity). In the absence of actin, it also functions as a NADPH oxidase producing H(2)O(2) (By similarity). Acts as a key regulat…
MMP11	9913.ENSBTAP00000008025	0.6934654050857482	0.2172189349112426	rgb(189,239,117)	Matrix metallopeptidase 11.
MRPL3	9913.ENSBTAP00000041336	0.6370490833826139	0.36207100591715974	rgb(239,185,117)	39S ribosomal protein L3, mitochondrial; Belongs to the universal ribosomal protein uL3 family.
MRPL30	9913.ENSBTAP00000005183	0.7929923122412774	0.3759171597633136	rgb(117,239,191)	39S ribosomal protein L30, mitochondrial; Belongs to the universal ribosomal protein uL30 family.
MRVI1	9913.ENSBTAP00000043465	0.3304849201655825	0.14106508875739646	rgb(117,239,120)	Protein MRVI1; Plays a role as NO/PRKG1-dependent regulator of IP3-induced calcium release; its phosphorylation by PRKG1 inhibits bradykinin and IP3-induced calcium release from intracellular stores. Recruits PRKG1 to the endoplasmic reticulum and may mediate the assembly of PRKG1 and ITPR1 in a macrocomplex. Involved in PRKG1 signaling cascade leading to inhibition of platelet activation and agg…
MSH5	9913.ENSBTAP00000026367	0.8398285038438794	0.2640828402366864	rgb(239,150,117)	DNA_MISMATCH_REPAIR_2 domain-containing protein.
MUC2	9913.ENSBTAP00000062426	0.49441159077468955	0.10005917159763314	rgb(117,239,127)	Uncharacterized protein.
MYCBP2	9913.ENSBTAP00000025100	0.15484920165582494	0.16449704142011834	rgb(117,239,197)	MYC binding protein 2.
MYH3	9913.ENSBTAP00000001120	0.47365464222353637	0.6555029585798817	rgb(117,239,228)	Myosin heavy chain 3; Belongs to the TRAFAC class myosin-kinesin ATPase superfamily. Myosin family.
MYH7	9913.ENSBTAP00000053217	0.43852749852158485	0.7316568047337279	rgb(117,117,239)	Myosin-7; Myosins are actin-based motor molecules with ATPase activity essential for muscle contraction. Forms regular bipolar thick filaments that, together with actin thin filaments, constitute the fundamental contractile unit of skeletal and cardiac muscle. Belongs to the TRAFAC class myosin-kinesin ATPase superfamily. Myosin family.
MYO16	9913.ENSBTAP00000024275	0.5529568302779421	0.8440236686390533	rgb(117,239,215)	Myosin XVI; Belongs to the TRAFAC class myosin-kinesin ATPase superfamily. Myosin family.
MYO3B	9913.ENSBTAP00000068555	0.08459491425192195	0.9143195266272189	rgb(117,117,239)	Myosin IIIB; Belongs to the TRAFAC class myosin-kinesin ATPase superfamily. Myosin family.
MYOD1	9913.ENSBTAP00000002868	0.41989946777055	0.6256804733727811	rgb(239,215,117)	Myoblast determination protein 1; Acts as a transcriptional activator that promotes transcription of muscle-specific target genes and plays a role in muscle differentiation. Together with MYF5 and MYOG, co-occupies muscle-specific gene promoter core region during myogenesis. Induces fibroblasts to differentiate into myoblasts. Interacts with and is inhibited by the twist protein. This interaction…
MYRFL	9913.ENSBTAP00000019581	0.8222649319929036	0.6389940828402367	rgb(117,117,239)	Myelin regulatory factor-like protein.
MYT1L	9913.ENSBTAP00000004603	0.2660851567120047	0.6331360946745562	rgb(221,239,117)	Myelin transcription factor 1-like.
NCKAP1	9913.ENSBTAP00000064482	0.6216144293317565	0.3961538461538462	rgb(117,117,239)	NCK associated protein 1.
NDOR1	9913.ENSBTAP00000056657	0.6876108811354228	0.8908875739644971	rgb(117,239,126)	NADPH-dependent diflavin oxidoreductase 1.
NDST3	9913.ENSBTAP00000009623	0.7871377882909522	0.715147928994083	rgb(117,239,144)	N-deacetylase and N-sulfotransferase 3.
NDUFA12	9913.ENSBTAP00000019529	0.7520106445890006	0.1762130177514793	rgb(239,174,117)	NADH dehydrogenase [ubiquinone] 1 alpha subcomplex subunit 12; Accessory subunit of the mitochondrial membrane respiratory chain NADH dehydrogenase (Complex I), that is believed not to be involved in catalysis. Complex I functions in the transfer of electrons from NADH to the respiratory chain. The immediate electron acceptor for the enzyme is believed to be ubiquinone.
NEB	9913.ENSBTAP00000066336	0.46886457717327024	0.6895857988165681	rgb(117,239,200)	Nebulin.
NEBL	9913.ENSBTAP00000053811	0.3773211117681845	0.8850295857988166	rgb(117,184,239)	Nebulette.
NECAB2	9913.ENSBTAP00000059180	0.8866646954464814	0.8967455621301776	rgb(239,139,117)	Oxidative stress induced growth inhibitor 1.
NECTIN1	9913.ENSBTAP00000053311	0.11972205795387346	0.30508875739644975	rgb(117,123,239)	Nectin cell adhesion molecule 1.
NEDD4L	9913.ENSBTAP00000067434	0.7110289769367238	0.9143195266272189	rgb(117,117,239)	NEDD4 like E3 ubiquitin protein ligase.
NFX1	9913.ENSBTAP00000042616	0.13143110585452394	0.4222485207100592	rgb(117,185,239)	Transcriptional repressor NF-X1; Binds to the X-box motif of MHC class II genes and represses their expression. May play an important role in regulating the duration of an inflammatory response by limiting the period in which MHC class II molecules are induced by interferon-gamma. Together with PABPC1 or PABPC4, acts as a coactivator for TERT expression. Mediates E2- dependent ubiquitination (By …
NNT	9913.ENSBTAP00000072815	0.3006800709639266	0.25822485207100593	rgb(117,239,160)	NAD(P) transhydrogenase, mitochondrial; The transhydrogenation between NADH and NADP is coupled to respiration and ATP hydrolysis and functions as a proton pump across the membrane (By similarity). May play a role in reactive oxygen species (ROS) detoxification in the adrenal gland (By similarity). In the N-terminal section; belongs to the AlaDH/PNT family.
NPHP1	9913.ENSBTAP00000010098	0.7764931992903608	0.34236686390532545	rgb(117,117,239)	Nephrocystin 1.
NPY2R	9913.ENSBTAP00000022125	0.29535777646363104	0.17035502958579882	rgb(141,239,117)	Neuropeptide Y receptor type 2; Receptor for neuropeptide Y and peptide YY; Belongs to the G-protein coupled receptor 1 family.
NRM	9913.ENSBTAP00000035763	0.1372856298048492	0.46911242603550296	rgb(132,239,117)	Nurim; Belongs to the nurim family.
NRXN1	9913.ENSBTAP00000053469	0.664192785334122	0.24970414201183433	rgb(117,239,136)	Neurexin-1; Cell surface protein involved in cell-cell-interactions, exocytosis of secretory granules and regulation of signal transmission. Function is isoform-specific. Alpha-type isoforms have a long N- terminus with six laminin G-like domains and play an important role in synaptic signal transmission. Alpha-type isoforms play a role in the regulation of calcium channel activity and Ca(2+)-tri…
NRXN1-2	9913.ENSBTAP00000044872	0.7222057953873449	0.2518343195266272	rgb(117,171,239)	Neurexin-1-beta; Neuronal cell surface protein that may be involved in cell recognition and cell adhesion by forming intracellular junctions through binding to neuroligins. May play a role in formation or maintenance of synaptic junctions. May mediate intracellular signaling. May play a role in angiogenesis (By similarity).
NUCB1	9913.ENSBTAP00000003073	0.6817563571850976	0.592130177514793	rgb(239,220,117)	Nucleobindin-1; Major calcium-binding protein of the Golgi which may have a role in calcium homeostasis. Acts as a non-receptor guanine nucleotide exchange factor which binds to and activates alpha subunits of guanine nucleotide-binding proteins (G proteins) (By similarity); Belongs to the nucleobindin family.
OC90	9913.ENSBTAP00000037179	0.21339444115907746	0.14692307692307693	rgb(177,239,117)	Uncharacterized protein.
ODF3	9913.ENSBTAP00000065886	0.16655824955647547	0.10005917159763314	rgb(239,121,117)	Outer dense fiber protein 3; Outer dense fibers are filamentous structures located on the outside of the axoneme in the midpiece and principal piece of the mammalian sperm tail. May help to maintain the passive elastic structures and elastic recoil of the sperm tail; Belongs to the ODF3 family.
OR10K1	9913.ENSBTAP00000050799	0.6115020697811946	0.12934911242603553	rgb(117,128,239)	G_PROTEIN_RECEP_F1_2 domain-containing protein.
OR51M1	9913.ENSBTAP00000026051	0.412448255470136	0.16449704142011834	rgb(117,117,239)	Olfactory receptor family 51 subfamily M member 1.
OR7E24	9913.ENSBTAP00000004091	0.4475753991720875	0.7327218934911244	rgb(117,159,239)	Olfactory receptor.
ORM1	9913.ENSBTAP00000022991	0.287906564163217	0.49627218934911244	rgb(117,168,239)	Alpha-1-acid glycoprotein; Functions as transport protein in the blood stream. Binds various ligands in the interior of its beta-barrel domain (By similarity). Appears to function in modulating the activity of the immune system during the acute-phase reaction (By similarity).
OSBPL7	9913.ENSBTAP00000017982	0.1724127735068007	0.7795857988165681	rgb(239,135,117)	Oxysterol-binding protein; Belongs to the OSBP family.
PARD3B	9913.ENSBTAP00000013618	0.804701360141928	0.80301775147929	rgb(117,187,239)	Par-3 family cell polarity regulator beta.
PARP11	9913.ENSBTAP00000046585	0.8632465996451805	0.7913017751479291	rgb(117,117,239)	Poly [ADP-ribose] polymerase.
PCDH1	9913.ENSBTAP00000062959	0.8983737433471319	0.2523668639053255	rgb(117,117,239)	Protocadherin 1.
PCDH15	9913.ENSBTAP00000071726	0.7599940863394442	0.6949112426035503	rgb(239,186,117)	Protocadherin related 15.
PDE11A	9913.ENSBTAP00000021805	0.6631283264340628	0.7103550295857989	rgb(117,117,239)	Phosphodiesterase.
PDE5A	9913.ENSBTAP00000014479	0.6248078060319339	0.6885207100591716	rgb(117,239,154)	cGMP-specific 3',5'-cyclic phosphodiesterase; Plays a role in signal transduction by regulating the intracellular concentration of cyclic nucleotides. This phosphodiesterase catalyzes the specific hydrolysis of cGMP to 5'-GMP. Specifically regulates nitric-oxide-generated cGMP (By similarity).
PDGFRB	9913.ENSBTAP00000064374	0.5109107037256061	0.5436686390532545	rgb(117,117,239)	Platelet-derived growth factor receptor beta; Tyrosine-protein kinase that acts as cell-surface receptor for homodimeric PDGFB and PDGFD and for heterodimers formed by PDGFA and PDGFB, and plays an essential role in the regulation of embryonic development, cell proliferation, survival, differentiation, chemotaxis and migration. Plays an essential role in blood vessel development by promoting prol…
PFAS	9913.ENSBTAP00000042131	0.43586635127143697	0.8674556213017752	rgb(117,117,239)	Phosphoribosylformylglycinamidine synthase.
PI4KA	9913.ENSBTAP00000018572	0.6056475458308693	0.2699408284023669	rgb(117,239,209)	Phosphatidylinositol 4-kinase alpha; Acts on phosphatidylinositol (PtdIns) in the first committed step in the production of the second messenger inositol-1,4,5,- trisphosphate.
PIGR	9913.ENSBTAP00000026377	0.72806031933767	0.44674556213017746	rgb(117,117,239)	Polymeric immunoglobulin receptor; This receptor binds polymeric IgA and IgM at the basolateral surface of epithelial cells. The complex is then transported across the cell to be secreted at the apical surface. During this process a cleavage occurs that separates the extracellular (known as the secretory component) from the transmembrane segment.
PIK3C3	9913.ENSBTAP00000057256	0.5928740390301597	0.30562130177514796	rgb(220,239,117)	Phosphatidylinositol 3-kinase catalytic subunit type 3.
PISD	9913.ENSBTAP00000057263	0.5119751626256652	0.8908875739644971	rgb(117,239,174)	Proline rich 14 like.
PLIN5	9913.ENSBTAP00000051478	0.8691011235955057	0.1586390532544379	rgb(117,214,239)	Perilipin-5; Lipid droplet-associated protein that maintains the balance between lipogenesis and lipolysis and also regulates fatty acid oxidation in oxidative tissues. Recruits mitochondria to the surface of lipid droplets and is involved in lipid droplet homeostasis by regulating both the storage of fatty acids in the form of triglycerides and the release of fatty acids for mitochondrial fatty …
PPM1B	9913.ENSBTAP00000043518	0.389030159668835	0.14106508875739646	rgb(117,239,167)	Protein phosphatase 1B; Enzyme with a broad specificity. Dephosphorylates PRKAA1 and PRKAA2. Inhibits TBK1-mediated antiviral signaling by dephosphorylating it at 'Ser-172'. Plays an important role in the termination of TNF- alpha-mediated NF-kappa-B activation through dephosphorylating and inactivating IKBKB/IKKB (By similarity).
PPP1R13B	9913.ENSBTAP00000059825	0.1021584861028977	0.4925443786982248	rgb(150,239,117)	Protein phosphatase 1 regulatory subunit 13B.
PPP6R3	9913.ENSBTAP00000012612	0.18997634535777647	0.41053254437869824	rgb(117,239,130)	Protein phosphatase 6 regulatory subunit 3.
PRDM2	9913.ENSBTAP00000065254	0.39488468361916024	0.9084615384615385	rgb(0,178,157)	PR/SET domain 2.
PRDX1	9913.ENSBTAP00000004751	0.248521584861029	0.3988165680473373	rgb(211,239,117)	Peroxiredoxin-1; Thiol-specific peroxidase that catalyzes the reduction of hydrogen peroxide and organic hydroperoxides to water and alcohols, respectively. Plays a role in cell protection against oxidative stress by detoxifying peroxides and as sensor of hydrogen peroxide-mediated signaling events. Might participate in the signaling cascades of growth factors and tumor necrosis factor-alpha by r…
PREX2	9913.ENSBTAP00000023938	0.6700473092844471	0.8440236686390533	rgb(117,190,239)	Phosphatidylinositol-3,4,5-trisphosphate dependent Rac exchange factor 2.
PRICKLE2	9913.ENSBTAP00000060199	0.8925192193968067	0.7385798816568048	rgb(239,226,117)	Prickle planar cell polarity protein 2.
PROS1	9913.ENSBTAP00000069933	0.08459491425192195	0.09420118343195266	rgb(117,167,239)	Vitamin K-dependent protein S; Anticoagulant plasma protein; it is a cofactor to activated protein C in the degradation of coagulation factors Va and VIIIa. It helps to prevent coagulation and stimulating fibrinolysis.
PTCHD1	9913.ENSBTAP00000027948	0.1489946777054997	0.23479289940828402	rgb(239,124,117)	Patched domain containing 1.
PTK7	9913.ENSBTAP00000016963	0.2602306327616795	0.8264497041420119	rgb(117,239,165)	Protein tyrosine kinase 7 (inactive); Belongs to the protein kinase superfamily. Tyr protein kinase family.
PTPRC	9913.ENSBTAP00000013320	0.8089591957421645	0.4680473372781065	rgb(144,239,117)	Protein tyrosine phosphatase receptor type C.
PTPRF	9913.ENSBTAP00000065652	0.09044943820224718	0.568698224852071	rgb(117,239,182)	Receptor-type tyrosine-protein phosphatase F; Possible cell adhesion receptor. It possesses an intrinsic protein tyrosine phosphatase activity (PTPase) and dephosphorylates EPHA2 regulating its activity (By similarity).
PTPRQ	9913.ENSBTAP00000070237	0.2836487285629805	0.09420118343195266	rgb(164,239,117)	Protein tyrosine phosphatase receptor type Q.
R3HCC1	9913.ENSBTAP00000067697	0.5939384979302188	0.9143195266272189	rgb(117,117,239)	R3H domain and coiled-coil containing 1.
RBM14	9913.ENSBTAP00000001619	0.5997930218805442	0.5218343195266273	rgb(117,211,239)	RNA-binding protein 14; May function as a nuclear receptor coactivator, enhancing transcription through other coactivators such as NCOA6 and CITED1. Regulates centriole biogenesis by suppressing the formation of aberrant centriolar protein complexes in the cytoplasm and thus preserving mitotic spindle integrity. Prevents the formation of the STIL-CENPJ complex (which can induce the formation of a…
RBM46	9913.ENSBTAP00000002223	0.34804849201655824	0.6272781065088757	rgb(162,239,117)	RNA binding motif protein 46.
RELCH	9913.ENSBTAP00000065884	0.09044943820224718	0.23479289940828402	rgb(239,173,117)	RAB11 binding and LisH domain, coiled-coil and HEAT repeat containing.
RELN	9913.ENSBTAP00000004768	0.5226197516262566	0.303491124260355	rgb(194,239,117)	Reelin; Extracellular matrix serine protease that plays a role in layering of neurons in the cerebral cortex and cerebellum. Regulates microtubule function in neurons and neuronal migration. Affects migration of sympathetic preganglionic neurons in the spinal cord, where it seems to act as a barrier to neuronal migration. Enzymatic activity is important for the modulation of cell adhesion. Bindin…
RESF1	9913.ENSBTAP00000006581	0.23095801301005325	0.691715976331361	rgb(206,239,117)	Retroelement silencing factor 1.
RFX6	9913.ENSBTAP00000000329	0.5353932584269663	0.5159763313609468	rgb(117,193,239)	Regulatory factor X6.
RGS7	9913.ENSBTAP00000051949	0.7461561206386754	0.8791715976331361	rgb(117,224,239)	Regulator of G-protein signaling 7; Regulates G protein-coupled receptor signaling cascades. Inhibits signal transduction by increasing the GTPase activity of G protein alpha subunits, thereby driving them into their inactive GDP- bound form. The RGS7/GNB5 dimer enhances GNAO1 GTPase activity. May play a role in synaptic vesicle exocytosis. Modulates the activity of potassium channels that are ac…
RMDN3	9913.ENSBTAP00000003795	0.34804849201655824	0.703431952662722	rgb(239,162,117)	Regulator of microtubule dynamics protein 3; Involved in cellular calcium homeostasis regulation (By similarity). May participate in differentiation and apoptosis of keratinocytes. Overexpression induces apoptosis (By similarity). Belongs to the RMDN family.
RNF38	9913.ENSBTAP00000074200	0.6700473092844471	0.07662721893491124	rgb(208,239,117)	Ring finger protein 38.
ROCK2	9913.ENSBTAP00000059586	0.318775872264932	0.8967455621301776	rgb(146,239,117)	Rho-associated protein kinase 2; Protein kinase which is a key regulator of actin cytoskeleton and cell polarity. Involved in regulation of smooth muscle contraction, actin cytoskeleton organization, stress fiber and focal adhesion formation, neurite retraction, cell adhesion and motility via phosphorylation of ADD1, BRCA2, CNN1, EZR, DPYSL2, EP300, MSN, MYL9/MLC2, NPM1, RDX, PPP1R12A and VIM. Ph…
RPGRIP1L	9913.ENSBTAP00000062284	0.712093435836783	0.31840236686390533	rgb(117,117,239)	RPGRIP1 like.
RPS6KA6	9913.ENSBTAP00000062237	0.09630396215257245	0.16449704142011834	rgb(239,213,117)	Ribosomal protein S6 kinase.
RSPH10B	9913.ENSBTAP00000007760	0.225103489059728	0.2757988165680474	rgb(123,239,117)	Radial spoke head 10 homolog B.
RTN1	9913.ENSBTAP00000048814	0.692400946185689	0.39242603550295857	rgb(117,205,239)	Coiled-coil domain-containing protein 175.
RTN4	9913.ENSBTAP00000014745	0.7674452986398581	0.4078698224852071	rgb(101,255,163)	Reticulon.
RYR1	9913.ENSBTAP00000058651	0.33314606741573033	0.7156804733727812	rgb(227,239,117)	Ryanodine receptor 1.
SCAF11	9913.ENSBTAP00000058297	0.365612063867534	0.11763313609467457	rgb(239,153,117)	SR-related CTD associated factor 11.
SCIN	9913.ENSBTAP00000012910	0.5119751626256652	0.1937869822485207	rgb(255,0,0)	Adseverin; Ca(2+)-dependent actin filament-severing protein that has a regulatory function in exocytosis by affecting the organization of the microfilament network underneath the plasma membrane. In vitro, also has barbed end capping and nucleating activities in the presence of Ca(2+). Severing activity is inhibited by phosphatidylinositol 4,5-bis-phosphate (PIP2). Required for megakaryocyte diff…
SCYL2	9913.ENSBTAP00000018408	0.1724127735068007	0.5394082840236687	rgb(239,145,117)	SCY1 like pseudokinase 2.
SDHAF1	9913.ENSBTAP00000050423	0.1255765819041987	0.592130177514793	rgb(117,125,239)	Succinate dehydrogenase assembly factor 1, mitochondrial; Plays an essential role in the assembly of succinate dehydrogenase (SDH), an enzyme complex (also referred to as respiratory complex II) that is a component of both the tricarboxylic acid (TCA) cycle and the mitochondrial electron transport chain, and which couples the oxidation of succinate to fumarate with the reduction of ubiquinone (co…
SEC24A	9913.ENSBTAP00000040703	0.6115020697811946	0.8674556213017752	rgb(117,117,239)	Protein transport protein Sec24A; Component of the coat protein complex II (COPII) which promotes the formation of transport vesicles from the endoplasmic reticulum (ER). The coat has two main functions, the physical deformation of the endoplasmic reticulum membrane into vesicles and the selection of cargo molecules for their transport to the Golgi complex. Plays a central role in cargo selection…
SEMA4B	9913.ENSBTAP00000028346	0.7461561206386754	0.15278106508875738	rgb(117,239,148)	Semaphorin 4B; Belongs to the semaphorin family.
SERPINA1	9913.ENSBTAP00000065816	0.34219396806623303	0.4403550295857988	rgb(239,117,117)	Alpha-1-antiproteinase; Inhibitor of serine proteases. Its primary target is elastase, but it also has a moderate affinity for plasmin and thrombin. Inhibits trypsin, chymotrypsin and plasminogen activator (By similarity); Belongs to the serpin family.
SERPINA3-1	9913.ENSBTAP00000054846	0.42735068007096394	0.4137278106508876	rgb(117,239,159)	Serpin A3-1; Potent inhibitor of the serine proteases elastase and trypsin. Moderately inhibits the serine proteases plasmin and chymotrypsin, and the thiol protease proenkephalin-processing enzyme. Does not inhibit the serine proteases cathepsin G, furin, kallikrein, thrombin, tissue plasminogen activator and urokinase, or the cysteine proteases cathepsin B, cathepsin L and papain. Belongs to th…
SERPINA3-3	9913.ENSBTAP00000055847	0.5529568302779421	0.11763313609467457	rgb(117,176,239)	Serpin A3-3; Serine protease inhibitor. Strongly inhibits elastase and trypsin stoichiometrically at the molar ratio of 1:1. Acts as a moderate inhibitor of plasmin and chymotrypsin. Does not inhibit thrombin, urokinase, kallikrein, tissue plasminogen activator, cathepsin G or the cysteine proteases papain, cathepsin B or cathepsin L.
SERPINA3-7	9913.ENSBTAP00000011576	0.19583086930810173	0.3285207100591716	rgb(239,129,117)	Serpin A3-7; Serine protease inhibitor.
SERPINA3-8	9913.ENSBTAP00000009261	0.2075399172087522	0.5628402366863906	rgb(239,123,117)	Serpin A3-8; Serine protease inhibitor.
SHLD2	9913.ENSBTAP00000025542	0.5274098166765229	0.670414201183432	rgb(117,230,239)	Shieldin complex subunit 2.
SLC13A1	9913.ENSBTAP00000059034	0.8866646954464814	0.6155621301775148	rgb(117,239,189)	Solute carrier family 13 member 1.
SLC26A7	9913.ENSBTAP00000043158	0.13143110585452394	0.14106508875739646	rgb(117,122,239)	Anion exchange transporter.
SLC44A2	9913.ENSBTAP00000067400	0.22191011235955055	0.5628402366863906	rgb(117,117,239)	Choline transporter-like protein 2; Choline transporter; Belongs to the CTL (choline transporter-like) family.
SLC44A3	9913.ENSBTAP00000063549	0.2974866942637493	0.5607100591715978	rgb(117,239,171)	Choline transporter-like protein 3.
SLC7A2	9913.ENSBTAP00000013304	0.6934654050857482	0.1937869822485207	rgb(117,117,239)	Solute carrier family 7 member 2.
SLC9A3R1	9913.ENSBTAP00000034568	0.14314015375517447	0.2113609467455621	rgb(117,239,133)	Na(+)/H(+) exchange regulatory cofactor NHE-RF1; Scaffold protein that connects plasma membrane proteins with members of the ezrin/moesin/radixin family and thereby helps to link them to the actin cytoskeleton and to regulate their surface expression. Necessary for recycling of internalized ADRB2. Was first known to play a role in the regulation of the activity and subcellular location of SLC9A3.…
SMG8	9913.ENSBTAP00000004365	0.6125665286812537	0.5532544378698225	rgb(239,201,117)	Protein SMG8; Involved in nonsense-mediated decay (NMD) of mRNAs containing premature stop codons. Is recruited by release factors to stalled ribosomes together with SMG1 and SMG9 (forming the SMG1C protein kinase complex) and, in the SMG1C complex, is required to mediate the recruitment of SMG1 to the ribosome:SURF complex and to suppress SMG1 kinase activity until the ribosome:SURF complex loca…
SNX31	9913.ENSBTAP00000014975	0.6115020697811946	0.8205917159763314	rgb(183,239,117)	Sorting nexin 31.
SPAG11B	9913.ENSBTAP00000046324	0.8632465996451805	0.7678698224852072	rgb(140,239,117)	Sperm associated antigen 11 isoform C.
SPAG7	9913.ENSBTAP00000011329	0.19583086930810173	0.4339644970414201	rgb(191,239,117)	Sperm-associated antigen 7.
SPATA5	9913.ENSBTAP00000070681	0.9100827912477825	0.9201775147928994	rgb(117,191,239)	Spermatogenesis associated 5.
SPEG	9913.ENSBTAP00000055177	0.18997634535777647	0.12349112426035504	rgb(117,117,239)	Striated muscle enriched protein kinase.
SPOP	9913.ENSBTAP00000007660	0.7184801892371379	0.2837869822485207	rgb(117,208,239)	Speckle-type POZ protein; Component of a cullin-RING-based BCR (BTB-CUL3-RBX1) E3 ubiquitin-protein ligase complex that mediates the ubiquitination of target proteins, leading most often to their proteasomal degradation. In complex with CUL3, involved in ubiquitination and proteasomal degradation of BRMS1, DAXX, PDX1/IPF1, GLI2 and GLI3. In complex with CUL3, involved in ubiquitination of MACROH2…
SPTY2D1	9913.ENSBTAP00000002177	0.4007392075694855	0.6507100591715977	rgb(239,147,117)	SPT2 chromatin protein domain containing 1.
SRPRA	9913.ENSBTAP00000018762	0.6556771141336488	0.3136094674556213	rgb(117,117,239)	Signal recognition particle receptor subunit alpha; Component of the SRP (signal recognition particle) receptor. Ensures, in conjunction with the signal recognition particle, the correct targeting of the nascent secretory proteins to the endoplasmic reticulum membrane system (By similarity).
SRRM2	9913.ENSBTAP00000066669	0.9042282672974572	0.3343786982248521	rgb(117,239,163)	Serine/arginine repetitive matrix 2.
SS18L2	9913.ENSBTAP00000066388	0.9042282672974572	0.09420118343195266	rgb(117,117,239)	SS18L2 protein.
STK31	9913.ENSBTAP00000014042	0.34219396806623303	0.1937869822485207	rgb(239,216,117)	Serine/threonine kinase 31.
STK32A	9913.ENSBTAP00000071007	0.07874039030159669	0.46911242603550296	rgb(117,239,145)	Serine/threonine kinase 32A; Belongs to the protein kinase superfamily.
STX16-NPEPL1	9913.ENSBTAP00000005055	0.6232111176818451	0.7620118343195267	rgb(214,239,117)	t-SNARE coiled-coil homology domain-containing protein; Belongs to the syntaxin family.
SYCP1	9913.ENSBTAP00000074043	0.07288586635127145	0.4222485207100592	rgb(0,28,178)	Synaptonemal complex protein 1.
SYCP2	9913.ENSBTAP00000004704	0.49441159077468955	0.2640828402366864	rgb(117,238,239)	Synaptonemal complex protein 2.
SYN1	9913.ENSBTAP00000027503	0.1489946777054997	0.5628402366863906	rgb(117,117,239)	Synapsin-1; Neuronal phosphoprotein that coats synaptic vesicles, binds to the cytoskeleton, and is believed to function in the regulation of neurotransmitter release. The complex formed with NOS1 and CAPON proteins is necessary for specific nitric-oxid functions at a presynaptic level (By similarity).
SYNE2	9913.ENSBTAP00000029285	0.8456830277942047	0.3519526627218935	rgb(153,239,117)	Spectrin repeat containing nuclear envelope protein 2.
SZT2	9913.ENSBTAP00000007333	0.5646658781785926	0.7737278106508877	rgb(117,220,239)	SZT2 subunit of KICSTOR complex.
TBCK	9913.ENSBTAP00000005539	0.23681253696037852	0.29923076923076924	rgb(187,255,101)	TBC1 domain containing kinase.
TDRD9	9913.ENSBTAP00000027199	0.201685393258427	0.8498816568047338	rgb(117,117,239)	Tudor domain containing 9.
TEK	9913.ENSBTAP00000026836	0.5710526315789475	0.5175739644970415	rgb(239,179,117)	Angiopoietin-1 receptor; Tyrosine-protein kinase that acts as cell-surface receptor for ANGPT1, ANGPT2 and ANGPT4 and regulates angiogenesis, endothelial cell survival, proliferation, migration, adhesion and cell spreading, reorganization of the actin cytoskeleton, but also maintenance of vascular quiescence. Has anti-inflammatory effects by preventing the leakage of proinflammatory plasma protei…
TF	9913.ENSBTAP00000009564	0.2565050266114725	0.39402366863905325	rgb(152,239,117)	Serotransferrin; Transferrins are iron binding transport proteins which can bind two Fe(3+) ions in association with the binding of an anion, usually bicarbonate. It is responsible for the transport of iron from sites of absorption and heme degradation to those of storage and utilization. Serum transferrin may also have a further role in stimulating cell proliferation.
TGFB2	9913.ENSBTAP00000064427	0.8084269662921348	0.2981656804733728	rgb(137,239,117)	Transforming growth factor beta-2 proprotein; Transforming growth factor beta-2 proprotein: Precursor of the Latency-associated peptide (LAP) and Transforming growth factor beta-2 (TGF-beta-2) chains, which constitute the regulatory and active subunit of TGF-beta-2, respectively. Transforming growth factor beta-2: Multifunctional protein that regulates various processes such as angiogenesis and h…
TIGD3	9913.ENSBTAP00000004005	0.49441159077468955	0.2875147928994083	rgb(117,239,195)	Tigger transposable element derived 3.
TMEM167B	9913.ENSBTAP00000052551	0.19583086930810173	0.8791715976331361	rgb(174,239,117)	Protein kish-B; Involved in the early part of the secretory pathway. Belongs to the KISH family.
TMEM245	9913.ENSBTAP00000059685	0.2602306327616795	0.8967455621301776	rgb(117,239,218)	Transmembrane protein 245.
TMEM70	9913.ENSBTAP00000017169	0.1724127735068007	0.80301775147929	rgb(150,101,255)	Transmembrane protein 70, mitochondrial; Involved in biogenesis of mitochondrial ATP synthase. Belongs to the TMEM70 family.
TMEM8B	9913.ENSBTAP00000015212	0.5529568302779421	0.8205917159763314	rgb(239,223,117)	Transmembrane protein 8B; May function as a regulator of the EGFR pathway. Probable tumor suppressor which may function in cell growth, proliferation and adhesion (By similarity); Belongs to the TMEM8 family.
TNKS	9913.ENSBTAP00000001917	0.21179775280898877	0.32	rgb(159,239,117)	Poly [ADP-ribose] polymerase.
TNKS1BP1	9913.ENSBTAP00000070521	0.2304257835600237	0.27420118343195266	rgb(129,239,117)	Tankyrase 1 binding protein 1.
TNRC18	9913.ENSBTAP00000062782	0.8983737433471319	0.22893491124260357	rgb(239,142,117)	Trinucleotide repeat containing 18.
TOMM70	9913.ENSBTAP00000019001	0.1724127735068007	0.3519526627218935	rgb(117,239,231)	Translocase of outer mitochondrial membrane 70 homolog A (S. cerevisiae).
TOPAZ1	9913.ENSBTAP00000053356	0.11972205795387346	0.18792899408284025	rgb(117,117,239)	Protein TOPAZ1; Important for normal spermatogenesis and male fertility. Specifically required for progression to the post-meiotic stages of spermatocyte development. Seems to be necessary for normal expression levels of a number of testis-expressed gene transcripts, although its role in this process is unclear.
TOPBP1	9913.ENSBTAP00000059732	0.7903311649911295	0.6501775147928995	rgb(239,206,117)	DNA topoisomerase II binding protein 1.
TRAF4	9913.ENSBTAP00000050075	0.25437610881135425	0.8733136094674556	rgb(239,182,117)	TNF receptor associated factor 4.
TRIP12	9913.ENSBTAP00000037967	0.5529568302779421	0.14106508875739646	rgb(239,156,117)	E3 ubiquitin-protein ligase TRIP12; E3 ubiquitin-protein ligase involved in ubiquitin fusion degradation (UFD) pathway and regulation of DNA repair. Part of the ubiquitin fusion degradation (UFD) pathway, a process that mediates ubiquitination of protein at their N-terminus, regardless of the presence of lysine residues in target proteins. Acts as a key regulator of DNA damage response by acting …
TRPV1	9913.ENSBTAP00000025131	0.3954169130691898	0.4941420118343195	rgb(200,239,117)	Transient receptor potential cation channel subfamily V member 1; Belongs to the transient receptor (TC 1.A.4) family.
TTK	9913.ENSBTAP00000045797	0.2932288586635127	0.5234319526627219	rgb(117,200,239)	TTK protein kinase.
TXNDC11	9913.ENSBTAP00000019741	0.7285925487876997	0.8323076923076924	rgb(255,175,101)	Thioredoxin domain-containing protein 11; May act as a redox regulator involved in DUOX proteins folding. The interaction with DUOX1 and DUOX2 suggest that it belongs to a multiprotein complex constituting the thyroid H(2)O(2) generating system. It is however not sufficient to assist DUOX1 and DUOX2 in H(2)O(2) generation (By similarity).
TXNDC16	9913.ENSBTAP00000061603	0.7695742164399765	0.902603550295858	rgb(170,239,117)	Thioredoxin domain containing 16.
UBR4	9913.ENSBTAP00000020277	0.23255470136014195	0.6640236686390533	rgb(117,165,239)	Ubiquitin protein ligase E3 component n-recognin 4.
UGGT1	9913.ENSBTAP00000007163	0.23095801301005325	0.5042603550295858	rgb(117,239,123)	UDP-glucose glycoprotein glucosyltransferase 1.
UMPS	9913.ENSBTAP00000018248	0.1724127735068007	0.6975739644970415	rgb(117,155,239)	Orotidine 5'-phosphate decarboxylase; In the C-terminal section; belongs to the OMP decarboxylase family.
UNC13A	9913.ENSBTAP00000044729	0.8632465996451805	0.3988165680473373	rgb(117,162,239)	Unc-13 homolog A.
USH2A	9913.ENSBTAP00000053495	0.7323181549379066	0.6842603550295859	rgb(229,239,117)	Usherin.
USP44	9913.ENSBTAP00000026571	0.8398285038438794	0.4222485207100592	rgb(239,161,117)	Ubiquitin carboxyl-terminal hydrolase; Deubiquitinating enzyme that removes conjugated ubiquitin from specific proteins to regulate different cellular processes. Belongs to the peptidase C19 family.
VEGFD	9913.ENSBTAP00000012474	0.5242164399763454	0.5655029585798816	rgb(117,117,239)	Vascular endothelial growth factor D; Belongs to the PDGF/VEGF growth factor family.
VLDLR	9913.ENSBTAP00000067110	0.5194263749260792	0.3381065088757396	rgb(239,138,117)	Very low density lipoprotein receptor.
VNN1	9913.ENSBTAP00000020086	0.16655824955647547	0.6155621301775148	rgb(117,239,234)	Pantetheinase; Amidohydrolase that hydrolyzes specifically one of the carboamide linkages in D-pantetheine thus recycling pantothenic acid (vitamin B5) and releasing cysteamine; Belongs to the carbon-nitrogen hydrolase superfamily. BTD/VNN family.
VPS13B	9913.ENSBTAP00000058618	0.42415730337078655	0.11763313609467457	rgb(117,188,239)	Vacuolar protein sorting 13 homolog B.
VTN	9913.ENSBTAP00000021497	0.5167652276759315	0.43023668639053253	rgb(239,126,117)	Vitronectin.
VWF	9913.ENSBTAP00000016273	0.4906859846244826	0.5031952662721894	rgb(117,239,156)	Von Willebrand factor; Important in the maintenance of hemostasis, it promotes adhesion of platelets to the sites of vascular injury by forming a molecular bridge between sub-endothelial collagen matrix and platelet- surface receptor complex GPIb-IX-V. Also acts as a chaperone for coagulation factor VIII, delivering it to the site of injury, stabilizing its heterodimeric structure and protecting …
WDHD1	9913.ENSBTAP00000025453	0.2330869308101715	0.5266272189349113	rgb(205,239,117)	WD repeat and HMG-box DNA binding protein 1.
ZBTB1	9913.ENSBTAP00000048980	0.8632465996451805	0.8733136094674556	rgb(131,239,117)	Zinc finger and BTB domain containing 1.
ZC2HC1A	9913.ENSBTAP00000070954	0.27779420461265525	0.9201775147928994	rgb(117,239,224)	Zinc finger C2HC domain-containing protein 1A; Belongs to the ZC2HC1 family.
ZDHHC20	9913.ENSBTAP00000008119	0.7812832643406269	0.2523668639053255	rgb(239,192,117)	Palmitoyltransferase ZDHHC20; Catalyzes palmitoylation of Cys residues on target proteins. Catalyzes palmitoylation of Cys residues in the cytoplasmic C-terminus of EGFR, and modulates the duration of EGFR signaling by modulating palmitoylation-dependent EGFR internalization and degradation. Has a preference for acyl-CoA with C16 fatty acid chains. Can also utilize acyl-CoA with C14 and C18 fatty…
ZDHHC8	9913.ENSBTAP00000006197	0.43001182732111176	0.7678698224852072	rgb(117,239,194)	Palmitoyltransferase; Belongs to the DHHC palmitoyltransferase family.
ZFYVE1	9913.ENSBTAP00000014664	0.5939384979302188	0.35355029585798814	rgb(239,188,117)	Zinc finger FYVE-type containing 1.
ZMYM4	9913.ENSBTAP00000062143	0.201685393258427	0.902603550295858	rgb(117,117,239)	Zinc finger MYM-type containing 4.
ZNF200	9913.ENSBTAP00000006843	0.23095801301005325	0.5276923076923077	rgb(117,203,239)	Zinc finger protein 200.
ZNF345	9913.ENSBTAP00000026567	0.8398285038438794	0.2875147928994083	rgb(117,239,135)	Zinc finger protein 345; May be involved in transcriptional regulation; Belongs to the krueppel C2H2-type zinc-finger protein family.
ZNF770	9913.ENSBTAP00000053372	0.49441159077468955	0.12349112426035504	rgb(239,198,117)	Zinc finger protein 770.
ZZEF1	9913.ENSBTAP00000053594	0.8749556475458309	0.592130177514793	rgb(239,212,117)	Zinc finger ZZ-type and EF-hand domain containing 1.

## Sheet: C. String node degrees
#node	identifier	node_degree
ALB	9913.ENSBTAP00000022763	19
ENSBTAP00000055469 (G3N0V0_BOVIN)	9913.ENSBTAP00000055469	10
FGA	9913.ENSBTAP00000002145	9
SERPINA1	9913.ENSBTAP00000065816	9
ENSBTAP00000059753	9913.ENSBTAP00000059753	8
FGG	9913.ENSBTAP00000008877	8
HP	9913.ENSBTAP00000071329	8
HPX	9913.ENSBTAP00000004635	8
A2M	9913.ENSBTAP00000006167	7
APOB	9913.ENSBTAP00000038799	7
FGB	9913.ENSBTAP00000067912	7
VTN	9913.ENSBTAP00000021497	7
CLU	9913.ENSBTAP00000007324	6
ENSBTAP00000061517	9913.ENSBTAP00000061517	6
LOC100300716	9913.ENSBTAP00000055719	6
TF	9913.ENSBTAP00000009564	6
C1QC	9913.ENSBTAP00000014865	5
KNG1	9913.ENSBTAP00000048995	5
LYN	9913.ENSBTAP00000026686	5
ORM1	9913.ENSBTAP00000022991	5
VWF	9913.ENSBTAP00000016273	5
APOC3	9913.ENSBTAP00000016453	4
C9	9913.ENSBTAP00000021495	4
COL6A1	9913.ENSBTAP00000015668	4
ENSBTAP00000060305	9913.ENSBTAP00000060305	4
C1R	9913.ENSBTAP00000069754	3
CACNA1A	9913.ENSBTAP00000019752	3
EPHA2	9913.ENSBTAP00000001080	3
F13B	9913.ENSBTAP00000020163	3
FBN1	9913.ENSBTAP00000064428	3
G3N188_BOVIN	9913.ENSBTAP00000055618	3
G3N342_BOVIN	9913.ENSBTAP00000056315	3
G5E5V1_BOVIN	9913.ENSBTAP00000032915	3
LUM	9913.ENSBTAP00000002279	3
MRPL3	9913.ENSBTAP00000041336	3
NEB	9913.ENSBTAP00000066336	3
VEGFD	9913.ENSBTAP00000012474	3
VLDLR	9913.ENSBTAP00000067110	3
CACNA1C	9913.ENSBTAP00000014104	2
CC2D2A	9913.ENSBTAP00000055063	2
COL12A1	9913.ENSBTAP00000026725	2
EFNA3	9913.ENSBTAP00000026958	2
EPHA1	9913.ENSBTAP00000071119	2
FN1	9913.ENSBTAP00000010925	2
INTS2	9913.ENSBTAP00000016011	2
INTS3	9913.ENSBTAP00000008186	2
INTS6	9913.ENSBTAP00000003868	2
LOC100847119	9913.ENSBTAP00000041616	2
MYH3	9913.ENSBTAP00000001120	2
NPHP1	9913.ENSBTAP00000010098	2
PCDH15	9913.ENSBTAP00000071726	2
PDGFRB	9913.ENSBTAP00000064374	2
PIGR	9913.ENSBTAP00000026377	2
PIK3C3	9913.ENSBTAP00000057256	2
RPGRIP1L	9913.ENSBTAP00000062284	2
TEK	9913.ENSBTAP00000026836	2
TRPV1	9913.ENSBTAP00000025131	2
TTK	9913.ENSBTAP00000045797	2
UBR4	9913.ENSBTAP00000020277	2
ADGRV1	9913.ENSBTAP00000007926	1
ADIPOQ	9913.ENSBTAP00000065019	1
ASPM	9913.ENSBTAP00000010340	1
AZGP1	9913.ENSBTAP00000037042	1
B2M	9913.ENSBTAP00000016359	1
BST1	9913.ENSBTAP00000008097	1
C5	9913.ENSBTAP00000016204	1
CACNA1B	9913.ENSBTAP00000045932	1
CACNA1F	9913.ENSBTAP00000021433	1
CCDC114	9913.ENSBTAP00000040922	1
COL6A5	9913.ENSBTAP00000060400	1
CTC1	9913.ENSBTAP00000042139	1
CUL3	9913.ENSBTAP00000029018	1
DCP1A	9913.ENSBTAP00000014415	1
DNAH11	9913.ENSBTAP00000053699	1
DYNC1H1	9913.ENSBTAP00000070205	1
ENSBTAP00000058812	9913.ENSBTAP00000058812	1
ENSBTAP00000060774	9913.ENSBTAP00000060774	1
ENSBTAP00000065677	9913.ENSBTAP00000065677	1
ENSBTAP00000069968	9913.ENSBTAP00000069968	1
ENSBTAP00000071723	9913.ENSBTAP00000071723	1
F10	9913.ENSBTAP00000021789	1
FBN2	9913.ENSBTAP00000020360	1
FETUB	9913.ENSBTAP00000023309	1
GABBR1	9913.ENSBTAP00000022907	1
HERC6	9913.ENSBTAP00000027362	1
HUWE1	9913.ENSBTAP00000008060	1
ITGB4	9913.ENSBTAP00000074469	1
ITIH2	9913.ENSBTAP00000018701	1
KCNJ5	9913.ENSBTAP00000073898	1
LRP2	9913.ENSBTAP00000005988	1
LTBP2	9913.ENSBTAP00000029274	1
MDC1	9913.ENSBTAP00000035767	1
MGC137211	9913.ENSBTAP00000024695	1
MRPL30	9913.ENSBTAP00000005183	1
MYH7	9913.ENSBTAP00000053217	1
MYOD1	9913.ENSBTAP00000002868	1
NCKAP1	9913.ENSBTAP00000064482	1
NNT	9913.ENSBTAP00000072815	1
NRXN1	9913.ENSBTAP00000053469	1
NRXN1-2	9913.ENSBTAP00000044872	1
PDE11A	9913.ENSBTAP00000021805	1
PDE5A	9913.ENSBTAP00000014479	1
PI4KA	9913.ENSBTAP00000018572	1
PTPRC	9913.ENSBTAP00000013320	1
RELN	9913.ENSBTAP00000004768	1
RTN1	9913.ENSBTAP00000048814	1
RTN4	9913.ENSBTAP00000014745	1
RYR1	9913.ENSBTAP00000058651	1
SERPINA3-1	9913.ENSBTAP00000054846	1
SHLD2	9913.ENSBTAP00000025542	1
SLC44A2	9913.ENSBTAP00000067400	1
SLC44A3	9913.ENSBTAP00000063549	1
SMG8	9913.ENSBTAP00000004365	1
SPOP	9913.ENSBTAP00000007660	1
SRPRA	9913.ENSBTAP00000018762	1
TGFB2	9913.ENSBTAP00000064427	1
TNKS	9913.ENSBTAP00000001917	1
TNKS1BP1	9913.ENSBTAP00000070521	1
TOPBP1	9913.ENSBTAP00000059732	1
USH2A	9913.ENSBTAP00000053495	1
WDHD1	9913.ENSBTAP00000025453	1
ZFYVE1	9913.ENSBTAP00000014664	1
ABCB5	9913.ENSBTAP00000060000	0
ABTB2	9913.ENSBTAP00000007781	0
ACADL	9913.ENSBTAP00000013988	0
ACP2	9913.ENSBTAP00000027968	0
ADGRL1	9913.ENSBTAP00000073270	0
ADRA1A	9913.ENSBTAP00000067347	0
AGAP2	9913.ENSBTAP00000009418	0
AGAP3	9913.ENSBTAP00000033311	0
ALMS1	9913.ENSBTAP00000044487	0
ALS2	9913.ENSBTAP00000053718	0
ANGEL2	9913.ENSBTAP00000004825	0
ANKRD42	9913.ENSBTAP00000033880	0
AP5B1	9913.ENSBTAP00000054921	0
APBB2	9913.ENSBTAP00000039437	0
APC2	9913.ENSBTAP00000035274	0
APPL2	9913.ENSBTAP00000041069	0
ARHGAP23	9913.ENSBTAP00000056495	0
ARHGEF17	9913.ENSBTAP00000053483	0
ASCC3	9913.ENSBTAP00000027294	0
ATP2B2	9913.ENSBTAP00000001723	0
ATP8B3	9913.ENSBTAP00000031534	0
BCL2L2	9913.ENSBTAP00000026248	0
BNIP1	9913.ENSBTAP00000065854	0
BRPF1	9913.ENSBTAP00000010224	0
BRWD1	9913.ENSBTAP00000018087	0
C29H11orf95	9913.ENSBTAP00000054235	0
C4BPA	9913.ENSBTAP00000073110	0
CAPN14	9913.ENSBTAP00000021091	0
CARNS1	9913.ENSBTAP00000023529	0
CASD1	9913.ENSBTAP00000067453	0
CAT	9913.ENSBTAP00000074355	0
CCDC14	9913.ENSBTAP00000000740	0
CCDC30-2	9913.ENSBTAP00000065031	0
CCDC8	9913.ENSBTAP00000024194	0
CD5L	9913.ENSBTAP00000052573	0
CDAN1	9913.ENSBTAP00000007561	0
CEP104	9913.ENSBTAP00000056801	0
CEP170B	9913.ENSBTAP00000006305	0
CGN1	9913.ENSBTAP00000003773	0
CIC	9913.ENSBTAP00000054105	0
CILK1	9913.ENSBTAP00000020711	0
CKLF	9913.ENSBTAP00000049197	0
COL18A1	9913.ENSBTAP00000034542	0
COL28A1	9913.ENSBTAP00000062228	0
CRYBG1	9913.ENSBTAP00000068722	0
CSMD2	9913.ENSBTAP00000007609	0
CSTA	9913.ENSBTAP00000014138	0
CUX1	9913.ENSBTAP00000070582	0
CXADR	9913.ENSBTAP00000057482	0
DAP	9913.ENSBTAP00000008327	0
DENND5B	9913.ENSBTAP00000027075	0
DGCR8	9913.ENSBTAP00000057457	0
DHX29	9913.ENSBTAP00000013897	0
DIAPH2	9913.ENSBTAP00000072562	0
DIP2A	9913.ENSBTAP00000074032	0
DKK4	9913.ENSBTAP00000000277	0
DMXL1	9913.ENSBTAP00000068906	0
DNAH12	9913.ENSBTAP00000066277	0
DNAH3	9913.ENSBTAP00000024702	0
DNAH8	9913.ENSBTAP00000018689	0
DNAJB1	9913.ENSBTAP00000036132	0
DNAJC13	9913.ENSBTAP00000003865	0
DOC2B	9913.ENSBTAP00000035058	0
DOCK4	9913.ENSBTAP00000074559	0
DPPA2	9913.ENSBTAP00000027264	0
DSPP	9913.ENSBTAP00000054907	0
DST-2	9913.ENSBTAP00000074367	0
DUSP5	9913.ENSBTAP00000027029	0
ENPEP	9913.ENSBTAP00000010972	0
ENSBTAP00000062433	9913.ENSBTAP00000062433	0
ENSBTAP00000062644	9913.ENSBTAP00000062644	0
ENSBTAP00000064659	9913.ENSBTAP00000064659	0
ENSBTAP00000065308	9913.ENSBTAP00000065308	0
ENSBTAP00000065380	9913.ENSBTAP00000065380	0
ENSBTAP00000066744	9913.ENSBTAP00000066744	0
ENSBTAP00000068198	9913.ENSBTAP00000068198	0
ENSBTAP00000071213	9913.ENSBTAP00000071213	0
ENSBTAP00000072499	9913.ENSBTAP00000072499	0
ENSBTAP00000072865	9913.ENSBTAP00000072865	0
EP400	9913.ENSBTAP00000027216	0
EPB41L1	9913.ENSBTAP00000002151	0
EPPK1	9913.ENSBTAP00000058073	0
ERC1	9913.ENSBTAP00000071004	0
F1MLW7_BOVIN	9913.ENSBTAP00000031165	0
FAM227A-2	9913.ENSBTAP00000061256	0
FAT4	9913.ENSBTAP00000013316	0
FBN3	9913.ENSBTAP00000057208	0
FBXL19	9913.ENSBTAP00000062981	0
FGFRL1	9913.ENSBTAP00000039238	0
FMO5	9913.ENSBTAP00000014385	0
FN3KRP	9913.ENSBTAP00000020456	0
FNIP2	9913.ENSBTAP00000070282	0
FRMPD3	9913.ENSBTAP00000004058	0
G3MX06_BOVIN	9913.ENSBTAP00000054064	0
G5E604_BOVIN	9913.ENSBTAP00000046041	0
G5E6L5_BOVIN	9913.ENSBTAP00000055652	0
GCNT3	9913.ENSBTAP00000012427	0
GID4	9913.ENSBTAP00000011595	0
GMIP	9913.ENSBTAP00000020147	0
GMPPB	9913.ENSBTAP00000015403	0
GSDMB	9913.ENSBTAP00000017083	0
HABP4	9913.ENSBTAP00000015392	0
HAL	9913.ENSBTAP00000065003	0
HCN4	9913.ENSBTAP00000023219	0
HHIP	9913.ENSBTAP00000021390	0
HIPK4	9913.ENSBTAP00000051851	0
HNRNPH1	9913.ENSBTAP00000074169	0
HTRA2	9913.ENSBTAP00000026804	0
IGFLR1	9913.ENSBTAP00000057282	0
INF2	9913.ENSBTAP00000012349	0
INKA1	9913.ENSBTAP00000016348	0
IQSEC3	9913.ENSBTAP00000025372	0
ITGAE	9913.ENSBTAP00000020307	0
ITIH1	9913.ENSBTAP00000010318	0
JAKMIP3	9913.ENSBTAP00000066345	0
JRKL	9913.ENSBTAP00000051509	0
KCNQ3	9913.ENSBTAP00000027546	0
KHDC3L	9913.ENSBTAP00000070542	0
KIAA1109	9913.ENSBTAP00000070593	0
KIF16B	9913.ENSBTAP00000058862	0
KIF2A	9913.ENSBTAP00000055986	0
KIN	9913.ENSBTAP00000053570	0
KRT42	9913.ENSBTAP00000059957	0
LAG3	9913.ENSBTAP00000066027	0
LIMS2	9913.ENSBTAP00000058058	0
LNPK	9913.ENSBTAP00000065567	0
LOC100138645	9913.ENSBTAP00000001383	0
LOC100294723	9913.ENSBTAP00000074118	0
LOC100848700	9913.ENSBTAP00000058914	0
LOC506828	9913.ENSBTAP00000037567	0
LOC507550	9913.ENSBTAP00000051075	0
LOC510536	9913.ENSBTAP00000032679	0
LOC510860	9913.ENSBTAP00000033374	0
LOC511240	9913.ENSBTAP00000040954	0
LOC530348	9913.ENSBTAP00000070605	0
LOC536660	9913.ENSBTAP00000035589	0
LOC618947	9913.ENSBTAP00000054612	0
LOC782698	9913.ENSBTAP00000019371	0
LOC788512	9913.ENSBTAP00000069046	0
LOC788939	9913.ENSBTAP00000054140	0
LOC789817	9913.ENSBTAP00000073151	0
LRBA	9913.ENSBTAP00000066900	0
LRIG3	9913.ENSBTAP00000002883	0
LRP12	9913.ENSBTAP00000067824	0
M1AP	9913.ENSBTAP00000009183	0
MAN2C1	9913.ENSBTAP00000009690	0
MAP2K7	9913.ENSBTAP00000014063	0
MAP3K5	9913.ENSBTAP00000011949	0
MARCHF6	9913.ENSBTAP00000036510	0
MAST1	9913.ENSBTAP00000007991	0
METTL16	9913.ENSBTAP00000035031	0
MFN2	9913.ENSBTAP00000070841	0
MICAL2	9913.ENSBTAP00000058159	0
MMP11	9913.ENSBTAP00000008025	0
MRVI1	9913.ENSBTAP00000043465	0
MSH5	9913.ENSBTAP00000026367	0
MUC2	9913.ENSBTAP00000062426	0
MYCBP2	9913.ENSBTAP00000025100	0
MYO16	9913.ENSBTAP00000024275	0
MYO3B	9913.ENSBTAP00000068555	0
MYRFL	9913.ENSBTAP00000019581	0
MYT1L	9913.ENSBTAP00000004603	0
NDOR1	9913.ENSBTAP00000056657	0
NDST3	9913.ENSBTAP00000009623	0
NDUFA12	9913.ENSBTAP00000019529	0
NEBL	9913.ENSBTAP00000053811	0
NECAB2	9913.ENSBTAP00000059180	0
NECTIN1	9913.ENSBTAP00000053311	0
NEDD4L	9913.ENSBTAP00000067434	0
NFX1	9913.ENSBTAP00000042616	0
NPY2R	9913.ENSBTAP00000022125	0
NRM	9913.ENSBTAP00000035763	0
NUCB1	9913.ENSBTAP00000003073	0
OC90	9913.ENSBTAP00000037179	0
ODF3	9913.ENSBTAP00000065886	0
OR10K1	9913.ENSBTAP00000050799	0
OR51M1	9913.ENSBTAP00000026051	0
OR7E24	9913.ENSBTAP00000004091	0
OSBPL7	9913.ENSBTAP00000017982	0
PARD3B	9913.ENSBTAP00000013618	0
PARP11	9913.ENSBTAP00000046585	0
PCDH1	9913.ENSBTAP00000062959	0
PFAS	9913.ENSBTAP00000042131	0
PISD	9913.ENSBTAP00000057263	0
PLIN5	9913.ENSBTAP00000051478	0
PPM1B	9913.ENSBTAP00000043518	0
PPP1R13B	9913.ENSBTAP00000059825	0
PPP6R3	9913.ENSBTAP00000012612	0
PRDM2	9913.ENSBTAP00000065254	0
PRDX1	9913.ENSBTAP00000004751	0
PREX2	9913.ENSBTAP00000023938	0
PRICKLE2	9913.ENSBTAP00000060199	0
PROS1	9913.ENSBTAP00000069933	0
PTCHD1	9913.ENSBTAP00000027948	0
PTK7	9913.ENSBTAP00000016963	0
PTPRF	9913.ENSBTAP00000065652	0
PTPRQ	9913.ENSBTAP00000070237	0
R3HCC1	9913.ENSBTAP00000067697	0
RBM14	9913.ENSBTAP00000001619	0
RBM46	9913.ENSBTAP00000002223	0
RELCH	9913.ENSBTAP00000065884	0
RESF1	9913.ENSBTAP00000006581	0
RFX6	9913.ENSBTAP00000000329	0
RGS7	9913.ENSBTAP00000051949	0
RMDN3	9913.ENSBTAP00000003795	0
RNF38	9913.ENSBTAP00000074200	0
ROCK2	9913.ENSBTAP00000059586	0
RPS6KA6	9913.ENSBTAP00000062237	0
RSPH10B	9913.ENSBTAP00000007760	0
SCAF11	9913.ENSBTAP00000058297	0
SCIN	9913.ENSBTAP00000012910	0
SCYL2	9913.ENSBTAP00000018408	0
SDHAF1	9913.ENSBTAP00000050423	0
SEC24A	9913.ENSBTAP00000040703	0
SEMA4B	9913.ENSBTAP00000028346	0
SERPINA3-3	9913.ENSBTAP00000055847	0
SERPINA3-7	9913.ENSBTAP00000011576	0
SERPINA3-8	9913.ENSBTAP00000009261	0
SLC13A1	9913.ENSBTAP00000059034	0
SLC26A7	9913.ENSBTAP00000043158	0
SLC7A2	9913.ENSBTAP00000013304	0
SLC9A3R1	9913.ENSBTAP00000034568	0
SNX31	9913.ENSBTAP00000014975	0
SPAG11B	9913.ENSBTAP00000046324	0
SPAG7	9913.ENSBTAP00000011329	0
SPATA5	9913.ENSBTAP00000070681	0
SPEG	9913.ENSBTAP00000055177	0
SPTY2D1	9913.ENSBTAP00000002177	0
SRRM2	9913.ENSBTAP00000066669	0
SS18L2	9913.ENSBTAP00000066388	0
STK31	9913.ENSBTAP00000014042	0
STK32A	9913.ENSBTAP00000071007	0
STX16-NPEPL1	9913.ENSBTAP00000005055	0
SYCP1	9913.ENSBTAP00000074043	0
SYCP2	9913.ENSBTAP00000004704	0
SYN1	9913.ENSBTAP00000027503	0
SYNE2	9913.ENSBTAP00000029285	0
SZT2	9913.ENSBTAP00000007333	0
TBCK	9913.ENSBTAP00000005539	0
TDRD9	9913.ENSBTAP00000027199	0
TIGD3	9913.ENSBTAP00000004005	0
TMEM167B	9913.ENSBTAP00000052551	0
TMEM245	9913.ENSBTAP00000059685	0
TMEM70	9913.ENSBTAP00000017169	0
TMEM8B	9913.ENSBTAP00000015212	0
TNRC18	9913.ENSBTAP00000062782	0
TOMM70	9913.ENSBTAP00000019001	0
TOPAZ1	9913.ENSBTAP00000053356	0
TRAF4	9913.ENSBTAP00000050075	0
TRIP12	9913.ENSBTAP00000037967	0
TXNDC11	9913.ENSBTAP00000019741	0
TXNDC16	9913.ENSBTAP00000061603	0
UGGT1	9913.ENSBTAP00000007163	0
UMPS	9913.ENSBTAP00000018248	0
UNC13A	9913.ENSBTAP00000044729	0
USP44	9913.ENSBTAP00000026571	0
VNN1	9913.ENSBTAP00000020086	0
VPS13B	9913.ENSBTAP00000058618	0
ZBTB1	9913.ENSBTAP00000048980	0
ZC2HC1A	9913.ENSBTAP00000070954	0
ZDHHC20	9913.ENSBTAP00000008119	0
ZDHHC8	9913.ENSBTAP00000006197	0
ZMYM4	9913.ENSBTAP00000062143	0
ZNF200	9913.ENSBTAP00000006843	0
ZNF345	9913.ENSBTAP00000026567	0
ZNF770	9913.ENSBTAP00000053372	0
ZZEF1	9913.ENSBTAP00000053594	0

## Sheet: D. String interactions
#node1	node2	node1_string_id	node2_string_id	neighborhood_on_chromosome	gene_fusion	phylogenetic_cooccurrence	homology	coexpression	experimentally_determined_interaction	database_annotated	automated_textmining	combined_score
A2M	HPX	9913.ENSBTAP00000006167	9913.ENSBTAP00000004635	0	0	0	0	0.130	0.064	0	0.684	0.721
A2M	ORM1	9913.ENSBTAP00000006167	9913.ENSBTAP00000022991	0	0	0	0	0.068	0	0	0.693	0.702
A2M	KNG1	9913.ENSBTAP00000006167	9913.ENSBTAP00000048995	0	0	0	0	0.069	0	0	0.698	0.706
A2M	TF	9913.ENSBTAP00000006167	9913.ENSBTAP00000009564	0	0	0	0	0.082	0	0	0.795	0.804
A2M	ALB	9913.ENSBTAP00000006167	9913.ENSBTAP00000022763	0	0	0	0	0.072	0.064	0	0.803	0.814
A2M	SERPINA1	9913.ENSBTAP00000006167	9913.ENSBTAP00000065816	0	0	0	0	0.138	0	0	0.862	0.876
A2M	HP	9913.ENSBTAP00000006167	9913.ENSBTAP00000071329	0	0	0	0	0.117	0.133	0	0.856	0.880
ADGRV1	PCDH15	9913.ENSBTAP00000007926	9913.ENSBTAP00000071726	0	0	0	0	0	0	0	0.778	0.778
ADIPOQ	ALB	9913.ENSBTAP00000065019	9913.ENSBTAP00000022763	0	0	0	0	0	0	0	0.863	0.863
ALB	FGA	9913.ENSBTAP00000022763	9913.ENSBTAP00000002145	0	0	0	0	0.444	0.064	0	0.661	0.808
ALB	HPX	9913.ENSBTAP00000022763	9913.ENSBTAP00000004635	0	0	0	0	0.259	0.102	0.500	0.699	0.886
ALB	A2M	9913.ENSBTAP00000022763	9913.ENSBTAP00000006167	0	0	0	0	0.072	0.064	0	0.803	0.814
ALB	CLU	9913.ENSBTAP00000022763	9913.ENSBTAP00000007324	0	0	0	0	0.077	0	0	0.768	0.776
ALB	FGG	9913.ENSBTAP00000022763	9913.ENSBTAP00000008877	0	0	0	0	0.333	0.041	0	0.589	0.714
ALB	TF	9913.ENSBTAP00000022763	9913.ENSBTAP00000009564	0	0	0	0	0.522	0	0	0.835	0.918
ALB	FN1	9913.ENSBTAP00000022763	9913.ENSBTAP00000010925	0	0	0	0	0	0.044	0	0.784	0.785
ALB	VWF	9913.ENSBTAP00000022763	9913.ENSBTAP00000016273	0	0	0	0	0	0	0	0.835	0.835
ALB	B2M	9913.ENSBTAP00000022763	9913.ENSBTAP00000016359	0	0	0	0	0	0.262	0	0.811	0.854
ALB	APOC3	9913.ENSBTAP00000022763	9913.ENSBTAP00000016453	0	0	0	0	0.426	0	0	0.533	0.720
ALB	VTN	9913.ENSBTAP00000022763	9913.ENSBTAP00000021497	0	0	0	0	0.442	0.055	0	0.889	0.936
ALB	TRPV1	9913.ENSBTAP00000022763	9913.ENSBTAP00000025131	0	0	0	0	0	0	0	0.814	0.814
ALB	FGB	9913.ENSBTAP00000022763	9913.ENSBTAP00000067912	0	0	0	0	0.462	0.041	0	0.720	0.843
ALB	KNG1	9913.ENSBTAP00000022763	9913.ENSBTAP00000048995	0	0	0	0	0.188	0	0	0.835	0.860
ALB	ORM1	9913.ENSBTAP00000022763	9913.ENSBTAP00000022991	0	0	0	0	0.164	0.067	0	0.839	0.863
ALB	ADIPOQ	9913.ENSBTAP00000022763	9913.ENSBTAP00000065019	0	0	0	0	0	0	0	0.863	0.863
ALB	APOB	9913.ENSBTAP00000022763	9913.ENSBTAP00000038799	0	0	0	0	0.349	0	0	0.850	0.898
ALB	SERPINA1	9913.ENSBTAP00000022763	9913.ENSBTAP00000065816	0	0	0	0	0.218	0.063	0	0.883	0.906
ALB	HP	9913.ENSBTAP00000022763	9913.ENSBTAP00000071329	0	0	0	0	0.282	0.067	0	0.886	0.917
APOB	FGA	9913.ENSBTAP00000038799	9913.ENSBTAP00000002145	0	0	0	0	0.566	0	0	0.389	0.723
APOB	LRP2	9913.ENSBTAP00000038799	9913.ENSBTAP00000005988	0	0	0	0	0	0.105	0.500	0.401	0.708
APOB	CLU	9913.ENSBTAP00000038799	9913.ENSBTAP00000007324	0	0	0	0	0.076	0	0.540	0.533	0.784
APOB	APOC3	9913.ENSBTAP00000038799	9913.ENSBTAP00000016453	0	0	0	0	0.747	0	0.540	0.915	0.989
APOB	ALB	9913.ENSBTAP00000038799	9913.ENSBTAP00000022763	0	0	0	0	0.349	0	0	0.850	0.898
APOB	FGB	9913.ENSBTAP00000038799	9913.ENSBTAP00000067912	0	0	0	0	0.570	0	0	0.375	0.720
APOB	VLDLR	9913.ENSBTAP00000038799	9913.ENSBTAP00000067110	0	0	0	0	0	0.105	0.540	0.598	0.820
APOC3	FGA	9913.ENSBTAP00000016453	9913.ENSBTAP00000002145	0	0	0	0	0.455	0	0	0.527	0.731
APOC3	CLU	9913.ENSBTAP00000016453	9913.ENSBTAP00000007324	0	0	0	0	0.098	0	0.540	0.507	0.777
APOC3	ALB	9913.ENSBTAP00000016453	9913.ENSBTAP00000022763	0	0	0	0	0.426	0	0	0.533	0.720
APOC3	APOB	9913.ENSBTAP00000016453	9913.ENSBTAP00000038799	0	0	0	0	0.747	0	0.540	0.915	0.989
ASPM	TTK	9913.ENSBTAP00000010340	9913.ENSBTAP00000045797	0	0	0	0	0.925	0	0	0.585	0.967
AZGP1	HPX	9913.ENSBTAP00000037042	9913.ENSBTAP00000004635	0	0	0	0	0.284	0.067	0	0.661	0.753
B2M	ALB	9913.ENSBTAP00000016359	9913.ENSBTAP00000022763	0	0	0	0	0	0.262	0	0.811	0.854
BST1	NNT	9913.ENSBTAP00000008097	9913.ENSBTAP00000072815	0	0	0	0	0	0	0.900	0.052	0.901
C1QC	ENSBTAP00000058812	9913.ENSBTAP00000014865	9913.ENSBTAP00000058812	0	0	0	0	0	0.534	0.400	0	0.708
C1QC	G3N0V0_BOVIN	9913.ENSBTAP00000014865	9913.ENSBTAP00000055469	0	0	0	0	0.153	0.534	0.400	0	0.742
C1QC	LOC100300716	9913.ENSBTAP00000014865	9913.ENSBTAP00000055719	0	0	0	0	0	0.066	0.900	0	0.902
C1QC	ENSBTAP00000059753	9913.ENSBTAP00000014865	9913.ENSBTAP00000059753	0	0	0	0	0.117	0.275	0.900	0	0.930
C1QC	C1R	9913.ENSBTAP00000014865	9913.ENSBTAP00000069754	0	0	0	0	0.209	0	0.900	0.566	0.962
C1R	C1QC	9913.ENSBTAP00000069754	9913.ENSBTAP00000014865	0	0	0	0	0.209	0	0.900	0.566	0.962
C1R	LOC100300716	9913.ENSBTAP00000069754	9913.ENSBTAP00000055719	0	0	0	0	0	0.163	0.900	0	0.912
C1R	ENSBTAP00000059753	9913.ENSBTAP00000069754	9913.ENSBTAP00000059753	0	0	0	0	0.090	0.144	0.900	0	0.915
C5	C9	9913.ENSBTAP00000016204	9913.ENSBTAP00000021495	0	0	0	0	0.323	0.865	0.400	0.682	0.980
C9	FGA	9913.ENSBTAP00000021495	9913.ENSBTAP00000002145	0	0	0	0	0.631	0	0	0.255	0.714
C9	FGG	9913.ENSBTAP00000021495	9913.ENSBTAP00000008877	0	0	0	0	0.596	0	0	0.336	0.720
C9	C5	9913.ENSBTAP00000021495	9913.ENSBTAP00000016204	0	0	0	0	0.323	0.865	0.400	0.682	0.980
C9	VTN	9913.ENSBTAP00000021495	9913.ENSBTAP00000021497	0	0	0	0	0.290	0	0.500	0.614	0.851
CACNA1A	CACNA1C	9913.ENSBTAP00000019752	9913.ENSBTAP00000014104	0	0	0.096	0.859	0	0.103	0.900	0.155	0.922
CACNA1A	RYR1	9913.ENSBTAP00000019752	9913.ENSBTAP00000058651	0	0	0	0	0.100	0.102	0.900	0.216	0.928
CACNA1A	CACNA1B	9913.ENSBTAP00000019752	9913.ENSBTAP00000045932	0	0	0.057	0.961	0.106	0	0.900	0.302	0.933
CACNA1B	CACNA1A	9913.ENSBTAP00000045932	9913.ENSBTAP00000019752	0	0	0.057	0.961	0.106	0	0.900	0.302	0.933
CACNA1C	CACNA1F	9913.ENSBTAP00000014104	9913.ENSBTAP00000021433	0	0	0.062	0.956	0	0	0.900	0.156	0.913
CACNA1C	CACNA1A	9913.ENSBTAP00000014104	9913.ENSBTAP00000019752	0	0	0.096	0.859	0	0.103	0.900	0.155	0.922
CACNA1F	CACNA1C	9913.ENSBTAP00000021433	9913.ENSBTAP00000014104	0	0	0.062	0.956	0	0	0.900	0.156	0.913
CC2D2A	NPHP1	9913.ENSBTAP00000055063	9913.ENSBTAP00000010098	0	0	0	0	0.086	0	0	0.774	0.784
CC2D2A	RPGRIP1L	9913.ENSBTAP00000055063	9913.ENSBTAP00000062284	0	0	0	0	0.162	0	0	0.838	0.858
CCDC114	DNAH11	9913.ENSBTAP00000040922	9913.ENSBTAP00000053699	0	0	0	0	0.085	0.190	0	0.701	0.759
CLU	HP	9913.ENSBTAP00000007324	9913.ENSBTAP00000071329	0	0	0	0	0	0.078	0	0.760	0.769
CLU	ALB	9913.ENSBTAP00000007324	9913.ENSBTAP00000022763	0	0	0	0	0.077	0	0	0.768	0.776
CLU	APOC3	9913.ENSBTAP00000007324	9913.ENSBTAP00000016453	0	0	0	0	0.098	0	0.540	0.507	0.777
CLU	APOB	9913.ENSBTAP00000007324	9913.ENSBTAP00000038799	0	0	0	0	0.076	0	0.540	0.533	0.784
CLU	VLDLR	9913.ENSBTAP00000007324	9913.ENSBTAP00000067110	0	0	0	0	0	0.115	0.540	0.602	0.824
CLU	VTN	9913.ENSBTAP00000007324	9913.ENSBTAP00000021497	0	0	0	0	0.088	0.052	0	0.831	0.841
COL12A1	LUM	9913.ENSBTAP00000026725	9913.ENSBTAP00000002279	0	0	0	0	0.480	0.087	0	0.719	0.855
COL12A1	COL6A1	9913.ENSBTAP00000026725	9913.ENSBTAP00000015668	0	0	0	0.587	0.211	0.073	0.400	0.570	0.786
COL6A1	LUM	9913.ENSBTAP00000015668	9913.ENSBTAP00000002279	0	0	0	0	0.425	0.087	0	0.570	0.754
COL6A1	COL6A5	9913.ENSBTAP00000015668	9913.ENSBTAP00000060400	0	0	0	0.555	0.054	0.068	0.400	0.516	0.710
COL6A1	COL12A1	9913.ENSBTAP00000015668	9913.ENSBTAP00000026725	0	0	0	0.587	0.211	0.073	0.400	0.570	0.786
COL6A1	FBN1	9913.ENSBTAP00000015668	9913.ENSBTAP00000064428	0	0	0	0	0.530	0.088	0	0.584	0.806
COL6A5	COL6A1	9913.ENSBTAP00000060400	9913.ENSBTAP00000015668	0	0	0	0.555	0.054	0.068	0.400	0.516	0.710
CTC1	SHLD2	9913.ENSBTAP00000042139	9913.ENSBTAP00000025542	0	0	0	0	0	0	0	0.770	0.770
CUL3	SPOP	9913.ENSBTAP00000029018	9913.ENSBTAP00000007660	0	0	0	0	0.088	0.819	0.900	0.987	0.999
DCP1A	SMG8	9913.ENSBTAP00000014415	9913.ENSBTAP00000004365	0	0	0	0	0.296	0	0.500	0.366	0.757
DNAH11	CCDC114	9913.ENSBTAP00000053699	9913.ENSBTAP00000040922	0	0	0	0	0.085	0.190	0	0.701	0.759
DYNC1H1	UBR4	9913.ENSBTAP00000070205	9913.ENSBTAP00000020277	0	0	0	0	0.706	0	0	0.283	0.780
EFNA3	EPHA2	9913.ENSBTAP00000026958	9913.ENSBTAP00000001080	0	0	0	0	0.086	0.262	0.650	0.936	0.982
EFNA3	EPHA1	9913.ENSBTAP00000026958	9913.ENSBTAP00000071119	0	0	0	0	0.086	0.262	0.650	0.730	0.927
ENSBTAP00000058812	C1QC	9913.ENSBTAP00000058812	9913.ENSBTAP00000014865	0	0	0	0	0	0.534	0.400	0	0.708
ENSBTAP00000059753	C1QC	9913.ENSBTAP00000059753	9913.ENSBTAP00000014865	0	0	0	0	0.117	0.275	0.900	0	0.930
ENSBTAP00000059753	PIGR	9913.ENSBTAP00000059753	9913.ENSBTAP00000026377	0	0	0	0	0.088	0.083	0.900	0	0.909
ENSBTAP00000059753	LYN	9913.ENSBTAP00000059753	9913.ENSBTAP00000026686	0	0	0	0	0	0.102	0.900	0.068	0.908
ENSBTAP00000059753	G3N0V0_BOVIN	9913.ENSBTAP00000059753	9913.ENSBTAP00000055469	0	0	0.131	0.805	0.707	0.166	0	0	0.769
ENSBTAP00000059753	LOC100300716	9913.ENSBTAP00000059753	9913.ENSBTAP00000055719	0	0	0	0	0	0.166	0.900	0.061	0.914
ENSBTAP00000059753	ENSBTAP00000061517	9913.ENSBTAP00000059753	9913.ENSBTAP00000061517	0	0	0	0	0.662	0.166	0	0.109	0.726
ENSBTAP00000059753	ENSBTAP00000060305	9913.ENSBTAP00000059753	9913.ENSBTAP00000060305	0	0	0.202	0	0	0.166	0.700	0.109	0.798
ENSBTAP00000059753	C1R	9913.ENSBTAP00000059753	9913.ENSBTAP00000069754	0	0	0	0	0.090	0.144	0.900	0	0.915
ENSBTAP00000060305	LYN	9913.ENSBTAP00000060305	9913.ENSBTAP00000026686	0	0	0	0	0	0.105	0.700	0.088	0.733
ENSBTAP00000060305	G3N0V0_BOVIN	9913.ENSBTAP00000060305	9913.ENSBTAP00000055469	0	0	0.211	0	0	0.425	0.540	0	0.773
ENSBTAP00000060305	G3N342_BOVIN	9913.ENSBTAP00000060305	9913.ENSBTAP00000056315	0	0	0	0	0	0.425	0.700	0	0.820
ENSBTAP00000060305	ENSBTAP00000059753	9913.ENSBTAP00000060305	9913.ENSBTAP00000059753	0	0	0.202	0	0	0.166	0.700	0.109	0.798
ENSBTAP00000060774	G3N0V0_BOVIN	9913.ENSBTAP00000060774	9913.ENSBTAP00000055469	0	0	0.214	0	0	0.312	0.540	0	0.729
ENSBTAP00000061517	G5E5V1_BOVIN	9913.ENSBTAP00000061517	9913.ENSBTAP00000032915	0	0	0.246	0	0.813	0.140	0	0	0.868
ENSBTAP00000061517	LOC100847119	9913.ENSBTAP00000061517	9913.ENSBTAP00000041616	0	0	0	0	0.813	0.271	0	0.052	0.859
ENSBTAP00000061517	G3N0V0_BOVIN	9913.ENSBTAP00000061517	9913.ENSBTAP00000055469	0	0	0.227	0	0.878	0.425	0.540	0	0.971
ENSBTAP00000061517	G3N188_BOVIN	9913.ENSBTAP00000061517	9913.ENSBTAP00000055618	0	0	0.059	0.962	0.759	0	0.540	0	0.886
ENSBTAP00000061517	G3N342_BOVIN	9913.ENSBTAP00000061517	9913.ENSBTAP00000056315	0	0.001	0	0	0.111	0.425	0.540	0	0.744
ENSBTAP00000061517	ENSBTAP00000059753	9913.ENSBTAP00000061517	9913.ENSBTAP00000059753	0	0	0	0	0.662	0.166	0	0.109	0.726
ENSBTAP00000065677	HERC6	9913.ENSBTAP00000065677	9913.ENSBTAP00000027362	0	0	0	0	0.724	0.049	0	0.116	0.747
ENSBTAP00000069968	G3N0V0_BOVIN	9913.ENSBTAP00000069968	9913.ENSBTAP00000055469	0	0	0.212	0	0	0.277	0.540	0	0.715
ENSBTAP00000071723	NEB	9913.ENSBTAP00000071723	9913.ENSBTAP00000066336	0	0	0	0	0.075	0.166	0	0.716	0.761
EPHA1	EPHA2	9913.ENSBTAP00000071119	9913.ENSBTAP00000001080	0	0	0.071	0.932	0	0.584	0.400	0.519	0.873
EPHA1	EFNA3	9913.ENSBTAP00000071119	9913.ENSBTAP00000026958	0	0	0	0	0.086	0.262	0.650	0.730	0.927
EPHA2	VEGFD	9913.ENSBTAP00000001080	9913.ENSBTAP00000012474	0	0	0	0	0.058	0.078	0.650	0.166	0.712
EPHA2	EPHA1	9913.ENSBTAP00000001080	9913.ENSBTAP00000071119	0	0	0.071	0.932	0	0.584	0.400	0.519	0.873
EPHA2	EFNA3	9913.ENSBTAP00000001080	9913.ENSBTAP00000026958	0	0	0	0	0.086	0.262	0.650	0.936	0.982
F10	VWF	9913.ENSBTAP00000021789	9913.ENSBTAP00000016273	0	0	0	0	0	0	0.900	0.350	0.932
F13B	FGA	9913.ENSBTAP00000020163	9913.ENSBTAP00000002145	0	0	0	0	0.748	0.101	0	0.655	0.915
F13B	FGG	9913.ENSBTAP00000020163	9913.ENSBTAP00000008877	0	0	0	0	0.309	0.233	0	0.630	0.787
F13B	MGC137211	9913.ENSBTAP00000020163	9913.ENSBTAP00000024695	0	0	0	0	0.202	0.047	0	0.663	0.721
FBN1	LUM	9913.ENSBTAP00000064428	9913.ENSBTAP00000002279	0	0	0	0	0.962	0.105	0	0.727	0.990
FBN1	COL6A1	9913.ENSBTAP00000064428	9913.ENSBTAP00000015668	0	0	0	0	0.530	0.088	0	0.584	0.806
FBN1	FBN2	9913.ENSBTAP00000064428	9913.ENSBTAP00000020360	0	0	0.054	0.972	0.071	0.068	0.500	0.442	0.730
FBN2	FBN1	9913.ENSBTAP00000020360	9913.ENSBTAP00000064428	0	0	0.054	0.972	0.071	0.068	0.500	0.442	0.730
FETUB	FGA	9913.ENSBTAP00000023309	9913.ENSBTAP00000002145	0	0	0	0	0.584	0.089	0	0.424	0.762
FGA	C9	9913.ENSBTAP00000002145	9913.ENSBTAP00000021495	0	0	0	0	0.631	0	0	0.255	0.714
FGA	APOB	9913.ENSBTAP00000002145	9913.ENSBTAP00000038799	0	0	0	0	0.566	0	0	0.389	0.723
FGA	APOC3	9913.ENSBTAP00000002145	9913.ENSBTAP00000016453	0	0	0	0	0.455	0	0	0.527	0.731
FGA	FETUB	9913.ENSBTAP00000002145	9913.ENSBTAP00000023309	0	0	0	0	0.584	0.089	0	0.424	0.762
FGA	ALB	9913.ENSBTAP00000002145	9913.ENSBTAP00000022763	0	0	0	0	0.444	0.064	0	0.661	0.808
FGA	HPX	9913.ENSBTAP00000002145	9913.ENSBTAP00000004635	0	0	0	0	0.749	0.050	0	0.288	0.816
FGA	F13B	9913.ENSBTAP00000002145	9913.ENSBTAP00000020163	0	0	0	0	0.748	0.101	0	0.655	0.915
FGA	FGB	9913.ENSBTAP00000002145	9913.ENSBTAP00000067912	0	0	0	0.726	0.943	0.992	0.900	0.689	0.999
FGA	FGG	9913.ENSBTAP00000002145	9913.ENSBTAP00000008877	0	0	0	0.753	0.938	0.992	0.900	0.685	0.999
FGB	FGA	9913.ENSBTAP00000067912	9913.ENSBTAP00000002145	0	0	0	0.726	0.943	0.992	0.900	0.689	0.999
FGB	FGG	9913.ENSBTAP00000067912	9913.ENSBTAP00000008877	0	0	0	0.803	0.934	0.983	0.900	0.688	0.999
FGB	ALB	9913.ENSBTAP00000067912	9913.ENSBTAP00000022763	0	0	0	0	0.462	0.041	0	0.720	0.843
FGB	APOB	9913.ENSBTAP00000067912	9913.ENSBTAP00000038799	0	0	0	0	0.570	0	0	0.375	0.720
FGB	KNG1	9913.ENSBTAP00000067912	9913.ENSBTAP00000048995	0	0	0	0	0.537	0.090	0	0.741	0.881
FGB	SERPINA3-1	9913.ENSBTAP00000067912	9913.ENSBTAP00000054846	0	0	0	0	0.669	0.063	0	0.122	0.704
FGB	SERPINA1	9913.ENSBTAP00000067912	9913.ENSBTAP00000065816	0	0	0	0	0.509	0.077	0	0.464	0.736
FGG	FGA	9913.ENSBTAP00000008877	9913.ENSBTAP00000002145	0	0	0	0.753	0.938	0.992	0.900	0.685	0.999
FGG	HPX	9913.ENSBTAP00000008877	9913.ENSBTAP00000004635	0	0	0	0	0.620	0.105	0	0.441	0.793
FGG	ALB	9913.ENSBTAP00000008877	9913.ENSBTAP00000022763	0	0	0	0	0.333	0.041	0	0.589	0.714
FGG	C9	9913.ENSBTAP00000008877	9913.ENSBTAP00000021495	0	0	0	0	0.596	0	0	0.336	0.720
FGG	F13B	9913.ENSBTAP00000008877	9913.ENSBTAP00000020163	0	0	0	0	0.309	0.233	0	0.630	0.787
FGG	HP	9913.ENSBTAP00000008877	9913.ENSBTAP00000071329	0	0	0	0	0.586	0.099	0	0.498	0.796
FGG	SERPINA1	9913.ENSBTAP00000008877	9913.ENSBTAP00000065816	0	0	0	0	0.589	0.059	0	0.564	0.817
FGG	FGB	9913.ENSBTAP00000008877	9913.ENSBTAP00000067912	0	0	0	0.803	0.934	0.983	0.900	0.688	0.999
FN1	ALB	9913.ENSBTAP00000010925	9913.ENSBTAP00000022763	0	0	0	0	0	0.044	0	0.784	0.785
FN1	VTN	9913.ENSBTAP00000010925	9913.ENSBTAP00000021497	0	0	0	0	0.094	0	0	0.874	0.881
G3N0V0_BOVIN	C1QC	9913.ENSBTAP00000055469	9913.ENSBTAP00000014865	0	0	0	0	0.153	0.534	0.400	0	0.742
G3N0V0_BOVIN	G5E5V1_BOVIN	9913.ENSBTAP00000055469	9913.ENSBTAP00000032915	0	0	0	0	0.815	0.166	0	0.043	0.839
G3N0V0_BOVIN	LOC100847119	9913.ENSBTAP00000055469	9913.ENSBTAP00000041616	0	0	0	0.624	0.819	0.308	0	0.043	0.870
G3N0V0_BOVIN	ENSBTAP00000069968	9913.ENSBTAP00000055469	9913.ENSBTAP00000069968	0	0	0.212	0	0	0.277	0.540	0	0.715
G3N0V0_BOVIN	ENSBTAP00000060774	9913.ENSBTAP00000055469	9913.ENSBTAP00000060774	0	0	0.214	0	0	0.312	0.540	0	0.729
G3N0V0_BOVIN	LOC100300716	9913.ENSBTAP00000055469	9913.ENSBTAP00000055719	0	0	0.242	0	0	0.312	0.540	0	0.739
G3N0V0_BOVIN	ENSBTAP00000059753	9913.ENSBTAP00000055469	9913.ENSBTAP00000059753	0	0	0.131	0.805	0.707	0.166	0	0	0.769
G3N0V0_BOVIN	ENSBTAP00000060305	9913.ENSBTAP00000055469	9913.ENSBTAP00000060305	0	0	0.211	0	0	0.425	0.540	0	0.773
G3N0V0_BOVIN	G3N188_BOVIN	9913.ENSBTAP00000055469	9913.ENSBTAP00000055618	0	0	0.246	0	0.747	0.312	0.540	0	0.931
G3N0V0_BOVIN	ENSBTAP00000061517	9913.ENSBTAP00000055469	9913.ENSBTAP00000061517	0	0	0.227	0	0.878	0.425	0.540	0	0.971
G3N188_BOVIN	G5E5V1_BOVIN	9913.ENSBTAP00000055618	9913.ENSBTAP00000032915	0	0	0.258	0	0.758	0.140	0	0	0.832
G3N188_BOVIN	G3N0V0_BOVIN	9913.ENSBTAP00000055618	9913.ENSBTAP00000055469	0	0	0.246	0	0.747	0.312	0.540	0	0.931
G3N188_BOVIN	ENSBTAP00000061517	9913.ENSBTAP00000055618	9913.ENSBTAP00000061517	0	0	0.059	0.962	0.759	0	0.540	0	0.886
G3N342_BOVIN	LYN	9913.ENSBTAP00000056315	9913.ENSBTAP00000026686	0	0	0	0	0	0.102	0.700	0	0.719
G3N342_BOVIN	ENSBTAP00000061517	9913.ENSBTAP00000056315	9913.ENSBTAP00000061517	0	0.001	0	0	0.111	0.425	0.540	0	0.744
G3N342_BOVIN	ENSBTAP00000060305	9913.ENSBTAP00000056315	9913.ENSBTAP00000060305	0	0	0	0	0	0.425	0.700	0	0.820
G5E5V1_BOVIN	G3N188_BOVIN	9913.ENSBTAP00000032915	9913.ENSBTAP00000055618	0	0	0.258	0	0.758	0.140	0	0	0.832
G5E5V1_BOVIN	G3N0V0_BOVIN	9913.ENSBTAP00000032915	9913.ENSBTAP00000055469	0	0	0	0	0.815	0.166	0	0.043	0.839
G5E5V1_BOVIN	ENSBTAP00000061517	9913.ENSBTAP00000032915	9913.ENSBTAP00000061517	0	0	0.246	0	0.813	0.140	0	0	0.868
GABBR1	KCNJ5	9913.ENSBTAP00000022907	9913.ENSBTAP00000073898	0	0	0	0	0.056	0.073	0.900	0.110	0.911
HERC6	ENSBTAP00000065677	9913.ENSBTAP00000027362	9913.ENSBTAP00000065677	0	0	0	0	0.724	0.049	0	0.116	0.747
HP	HPX	9913.ENSBTAP00000071329	9913.ENSBTAP00000004635	0	0	0	0	0.168	0.073	0	0.918	0.932
HP	A2M	9913.ENSBTAP00000071329	9913.ENSBTAP00000006167	0	0	0	0	0.117	0.133	0	0.856	0.880
HP	CLU	9913.ENSBTAP00000071329	9913.ENSBTAP00000007324	0	0	0	0	0	0.078	0	0.760	0.769
HP	FGG	9913.ENSBTAP00000071329	9913.ENSBTAP00000008877	0	0	0	0	0.586	0.099	0	0.498	0.796
HP	TF	9913.ENSBTAP00000071329	9913.ENSBTAP00000009564	0	0	0	0	0.156	0.064	0	0.744	0.780
HP	ALB	9913.ENSBTAP00000071329	9913.ENSBTAP00000022763	0	0	0	0	0.282	0.067	0	0.886	0.917
HP	ORM1	9913.ENSBTAP00000071329	9913.ENSBTAP00000022991	0	0	0	0	0.158	0.069	0	0.923	0.935
HP	SERPINA1	9913.ENSBTAP00000071329	9913.ENSBTAP00000065816	0	0	0	0	0.514	0.073	0	0.837	0.920
HPX	FGA	9913.ENSBTAP00000004635	9913.ENSBTAP00000002145	0	0	0	0	0.749	0.050	0	0.288	0.816
HPX	A2M	9913.ENSBTAP00000004635	9913.ENSBTAP00000006167	0	0	0	0	0.130	0.064	0	0.684	0.721
HPX	TF	9913.ENSBTAP00000004635	9913.ENSBTAP00000009564	0	0	0	0	0.155	0.067	0	0.697	0.741
HPX	AZGP1	9913.ENSBTAP00000004635	9913.ENSBTAP00000037042	0	0	0	0	0.284	0.067	0	0.661	0.753
HPX	FGG	9913.ENSBTAP00000004635	9913.ENSBTAP00000008877	0	0	0	0	0.620	0.105	0	0.441	0.793
HPX	SERPINA1	9913.ENSBTAP00000004635	9913.ENSBTAP00000065816	0	0	0	0	0.451	0.077	0	0.709	0.840
HPX	ALB	9913.ENSBTAP00000004635	9913.ENSBTAP00000022763	0	0	0	0	0.259	0.102	0.500	0.699	0.886
HPX	HP	9913.ENSBTAP00000004635	9913.ENSBTAP00000071329	0	0	0	0	0.168	0.073	0	0.918	0.932
HUWE1	UBR4	9913.ENSBTAP00000008060	9913.ENSBTAP00000020277	0	0	0	0	0.535	0	0	0.770	0.888
INTS2	INTS6	9913.ENSBTAP00000016011	9913.ENSBTAP00000003868	0	0	0	0	0.103	0.962	0.800	0.764	0.998
INTS2	INTS3	9913.ENSBTAP00000016011	9913.ENSBTAP00000008186	0	0	0	0	0.069	0.938	0.800	0.641	0.995
INTS3	INTS6	9913.ENSBTAP00000008186	9913.ENSBTAP00000003868	0	0	0	0	0	0.962	0.800	0.894	0.999
INTS3	INTS2	9913.ENSBTAP00000008186	9913.ENSBTAP00000016011	0	0	0	0	0.069	0.938	0.800	0.641	0.995
INTS6	INTS2	9913.ENSBTAP00000003868	9913.ENSBTAP00000016011	0	0	0	0	0.103	0.962	0.800	0.764	0.998
INTS6	INTS3	9913.ENSBTAP00000003868	9913.ENSBTAP00000008186	0	0	0	0	0	0.962	0.800	0.894	0.999
ITGB4	VTN	9913.ENSBTAP00000074469	9913.ENSBTAP00000021497	0	0	0	0	0	0.104	0	0.748	0.765
ITIH2	VTN	9913.ENSBTAP00000018701	9913.ENSBTAP00000021497	0	0	0	0	0.762	0.061	0	0.268	0.822
KCNJ5	GABBR1	9913.ENSBTAP00000073898	9913.ENSBTAP00000022907	0	0	0	0	0.056	0.073	0.900	0.110	0.911
KNG1	A2M	9913.ENSBTAP00000048995	9913.ENSBTAP00000006167	0	0	0	0	0.069	0	0	0.698	0.706
KNG1	ALB	9913.ENSBTAP00000048995	9913.ENSBTAP00000022763	0	0	0	0	0.188	0	0	0.835	0.860
KNG1	TRPV1	9913.ENSBTAP00000048995	9913.ENSBTAP00000025131	0	0	0	0	0	0	0	0.776	0.776
KNG1	SERPINA1	9913.ENSBTAP00000048995	9913.ENSBTAP00000065816	0	0	0	0	0.300	0	0	0.729	0.802
KNG1	FGB	9913.ENSBTAP00000048995	9913.ENSBTAP00000067912	0	0	0	0	0.537	0.090	0	0.741	0.881
LOC100300716	C1QC	9913.ENSBTAP00000055719	9913.ENSBTAP00000014865	0	0	0	0	0	0.066	0.900	0	0.902
LOC100300716	PIGR	9913.ENSBTAP00000055719	9913.ENSBTAP00000026377	0	0	0	0	0	0.090	0.900	0	0.905
LOC100300716	LYN	9913.ENSBTAP00000055719	9913.ENSBTAP00000026686	0	0	0	0	0	0.105	0.900	0.052	0.907
LOC100300716	G3N0V0_BOVIN	9913.ENSBTAP00000055719	9913.ENSBTAP00000055469	0	0	0.242	0	0	0.312	0.540	0	0.739
LOC100300716	C1R	9913.ENSBTAP00000055719	9913.ENSBTAP00000069754	0	0	0	0	0	0.163	0.900	0	0.912
LOC100300716	ENSBTAP00000059753	9913.ENSBTAP00000055719	9913.ENSBTAP00000059753	0	0	0	0	0	0.166	0.900	0.061	0.914
LOC100847119	ENSBTAP00000061517	9913.ENSBTAP00000041616	9913.ENSBTAP00000061517	0	0	0	0	0.813	0.271	0	0.052	0.859
LOC100847119	G3N0V0_BOVIN	9913.ENSBTAP00000041616	9913.ENSBTAP00000055469	0	0	0	0.624	0.819	0.308	0	0.043	0.870
LRP2	APOB	9913.ENSBTAP00000005988	9913.ENSBTAP00000038799	0	0	0	0	0	0.105	0.500	0.401	0.708
LTBP2	TGFB2	9913.ENSBTAP00000029274	9913.ENSBTAP00000064427	0	0	0	0	0.055	0.063	0	0.762	0.771
LUM	COL6A1	9913.ENSBTAP00000002279	9913.ENSBTAP00000015668	0	0	0	0	0.425	0.087	0	0.570	0.754
LUM	COL12A1	9913.ENSBTAP00000002279	9913.ENSBTAP00000026725	0	0	0	0	0.480	0.087	0	0.719	0.855
LUM	FBN1	9913.ENSBTAP00000002279	9913.ENSBTAP00000064428	0	0	0	0	0.962	0.105	0	0.727	0.990
LYN	PTPRC	9913.ENSBTAP00000026686	9913.ENSBTAP00000013320	0	0	0	0	0.198	0.311	0.900	0.215	0.950
LYN	G3N342_BOVIN	9913.ENSBTAP00000026686	9913.ENSBTAP00000056315	0	0	0	0	0	0.102	0.700	0	0.719
LYN	ENSBTAP00000060305	9913.ENSBTAP00000026686	9913.ENSBTAP00000060305	0	0	0	0	0	0.105	0.700	0.088	0.733
LYN	LOC100300716	9913.ENSBTAP00000026686	9913.ENSBTAP00000055719	0	0	0	0	0	0.105	0.900	0.052	0.907
LYN	ENSBTAP00000059753	9913.ENSBTAP00000026686	9913.ENSBTAP00000059753	0	0	0	0	0	0.102	0.900	0.068	0.908
MDC1	TOPBP1	9913.ENSBTAP00000035767	9913.ENSBTAP00000059732	0	0	0	0	0.086	0.612	0	0.837	0.937
MGC137211	F13B	9913.ENSBTAP00000024695	9913.ENSBTAP00000020163	0	0	0	0	0.202	0.047	0	0.663	0.721
MRPL3	MRPL30	9913.ENSBTAP00000041336	9913.ENSBTAP00000005183	0	0	0	0	0.135	0.820	0	0.092	0.846
MRPL3	SRPRA	9913.ENSBTAP00000041336	9913.ENSBTAP00000018762	0	0	0	0	0.127	0.608	0	0.271	0.728
MRPL3	NCKAP1	9913.ENSBTAP00000041336	9913.ENSBTAP00000064482	0	0	0	0	0	0	0	0.717	0.717
MRPL30	MRPL3	9913.ENSBTAP00000005183	9913.ENSBTAP00000041336	0	0	0	0	0.135	0.820	0	0.092	0.846
MYH3	MYOD1	9913.ENSBTAP00000001120	9913.ENSBTAP00000002868	0	0	0	0	0.099	0	0	0.787	0.800
MYH3	NEB	9913.ENSBTAP00000001120	9913.ENSBTAP00000066336	0	0	0	0	0.634	0.059	0.500	0.282	0.860
MYH7	NEB	9913.ENSBTAP00000053217	9913.ENSBTAP00000066336	0	0	0	0	0.835	0.059	0	0.470	0.910
MYOD1	MYH3	9913.ENSBTAP00000002868	9913.ENSBTAP00000001120	0	0	0	0	0.099	0	0	0.787	0.800
NCKAP1	MRPL3	9913.ENSBTAP00000064482	9913.ENSBTAP00000041336	0	0	0	0	0	0	0	0.717	0.717
NEB	MYH3	9913.ENSBTAP00000066336	9913.ENSBTAP00000001120	0	0	0	0	0.634	0.059	0.500	0.282	0.860
NEB	MYH7	9913.ENSBTAP00000066336	9913.ENSBTAP00000053217	0	0	0	0	0.835	0.059	0	0.470	0.910
NEB	ENSBTAP00000071723	9913.ENSBTAP00000066336	9913.ENSBTAP00000071723	0	0	0	0	0.075	0.166	0	0.716	0.761
NNT	BST1	9913.ENSBTAP00000072815	9913.ENSBTAP00000008097	0	0	0	0	0	0	0.900	0.052	0.901
NPHP1	CC2D2A	9913.ENSBTAP00000010098	9913.ENSBTAP00000055063	0	0	0	0	0.086	0	0	0.774	0.784
NPHP1	RPGRIP1L	9913.ENSBTAP00000010098	9913.ENSBTAP00000062284	0	0	0	0	0.070	0.311	0.800	0.808	0.972
NRXN1	NRXN1-2	9913.ENSBTAP00000053469	9913.ENSBTAP00000044872	0	0.900	0	0	0.234	0	0	0.812	0.984
NRXN1-2	NRXN1	9913.ENSBTAP00000044872	9913.ENSBTAP00000053469	0	0.900	0	0	0.234	0	0	0.812	0.984
ORM1	A2M	9913.ENSBTAP00000022991	9913.ENSBTAP00000006167	0	0	0	0	0.068	0	0	0.693	0.702
ORM1	TF	9913.ENSBTAP00000022991	9913.ENSBTAP00000009564	0	0	0	0	0.190	0.064	0	0.643	0.706
ORM1	ALB	9913.ENSBTAP00000022991	9913.ENSBTAP00000022763	0	0	0	0	0.164	0.067	0	0.839	0.863
ORM1	HP	9913.ENSBTAP00000022991	9913.ENSBTAP00000071329	0	0	0	0	0.158	0.069	0	0.923	0.935
ORM1	SERPINA1	9913.ENSBTAP00000022991	9913.ENSBTAP00000065816	0	0	0	0	0.750	0.078	0	0.767	0.941
PCDH15	ADGRV1	9913.ENSBTAP00000071726	9913.ENSBTAP00000007926	0	0	0	0	0	0	0	0.778	0.778
PCDH15	USH2A	9913.ENSBTAP00000071726	9913.ENSBTAP00000053495	0	0	0	0	0.086	0	0	0.856	0.863
PDE11A	PDE5A	9913.ENSBTAP00000021805	9913.ENSBTAP00000014479	0	0	0.062	0.884	0	0.520	0.400	0.434	0.826
PDE5A	PDE11A	9913.ENSBTAP00000014479	9913.ENSBTAP00000021805	0	0	0.062	0.884	0	0.520	0.400	0.434	0.826
PDGFRB	VEGFD	9913.ENSBTAP00000064374	9913.ENSBTAP00000012474	0	0	0	0	0	0.131	0.650	0.505	0.836
PDGFRB	VWF	9913.ENSBTAP00000064374	9913.ENSBTAP00000016273	0	0	0	0	0.159	0.047	0	0.674	0.716
PI4KA	PIK3C3	9913.ENSBTAP00000018572	9913.ENSBTAP00000057256	0	0	0	0.572	0	0	0.900	0.278	0.924
PIGR	LOC100300716	9913.ENSBTAP00000026377	9913.ENSBTAP00000055719	0	0	0	0	0	0.090	0.900	0	0.905
PIGR	ENSBTAP00000059753	9913.ENSBTAP00000026377	9913.ENSBTAP00000059753	0	0	0	0	0.088	0.083	0.900	0	0.909
PIK3C3	ZFYVE1	9913.ENSBTAP00000057256	9913.ENSBTAP00000014664	0	0	0	0	0	0	0	0.715	0.715
PIK3C3	PI4KA	9913.ENSBTAP00000057256	9913.ENSBTAP00000018572	0	0	0	0.572	0	0	0.900	0.278	0.924
PTPRC	LYN	9913.ENSBTAP00000013320	9913.ENSBTAP00000026686	0	0	0	0	0.198	0.311	0.900	0.215	0.950
RELN	VLDLR	9913.ENSBTAP00000004768	9913.ENSBTAP00000067110	0	0	0	0	0	0.689	0.900	0.897	0.996
RPGRIP1L	NPHP1	9913.ENSBTAP00000062284	9913.ENSBTAP00000010098	0	0	0	0	0.070	0.311	0.800	0.808	0.972
RPGRIP1L	CC2D2A	9913.ENSBTAP00000062284	9913.ENSBTAP00000055063	0	0	0	0	0.162	0	0	0.838	0.858
RTN1	RTN4	9913.ENSBTAP00000048814	9913.ENSBTAP00000014745	0	0	0	0.671	0	0.436	0	0.507	0.710
RTN4	RTN1	9913.ENSBTAP00000014745	9913.ENSBTAP00000048814	0	0	0	0.671	0	0.436	0	0.507	0.710
RYR1	CACNA1A	9913.ENSBTAP00000058651	9913.ENSBTAP00000019752	0	0	0	0	0.100	0.102	0.900	0.216	0.928
SERPINA1	HPX	9913.ENSBTAP00000065816	9913.ENSBTAP00000004635	0	0	0	0	0.451	0.077	0	0.709	0.840
SERPINA1	A2M	9913.ENSBTAP00000065816	9913.ENSBTAP00000006167	0	0	0	0	0.138	0	0	0.862	0.876
SERPINA1	FGG	9913.ENSBTAP00000065816	9913.ENSBTAP00000008877	0	0	0	0	0.589	0.059	0	0.564	0.817
SERPINA1	TF	9913.ENSBTAP00000065816	9913.ENSBTAP00000009564	0	0	0	0	0.306	0.067	0	0.693	0.784
SERPINA1	ALB	9913.ENSBTAP00000065816	9913.ENSBTAP00000022763	0	0	0	0	0.218	0.063	0	0.883	0.906
SERPINA1	ORM1	9913.ENSBTAP00000065816	9913.ENSBTAP00000022991	0	0	0	0	0.750	0.078	0	0.767	0.941
SERPINA1	KNG1	9913.ENSBTAP00000065816	9913.ENSBTAP00000048995	0	0	0	0	0.300	0	0	0.729	0.802
SERPINA1	FGB	9913.ENSBTAP00000065816	9913.ENSBTAP00000067912	0	0	0	0	0.509	0.077	0	0.464	0.736
SERPINA1	HP	9913.ENSBTAP00000065816	9913.ENSBTAP00000071329	0	0	0	0	0.514	0.073	0	0.837	0.920
SERPINA3-1	FGB	9913.ENSBTAP00000054846	9913.ENSBTAP00000067912	0	0	0	0	0.669	0.063	0	0.122	0.704
SHLD2	CTC1	9913.ENSBTAP00000025542	9913.ENSBTAP00000042139	0	0	0	0	0	0	0	0.770	0.770
SLC44A2	SLC44A3	9913.ENSBTAP00000067400	9913.ENSBTAP00000063549	0	0	0.132	0.698	0	0.069	0.900	0.308	0.936
SLC44A3	SLC44A2	9913.ENSBTAP00000063549	9913.ENSBTAP00000067400	0	0	0.132	0.698	0	0.069	0.900	0.308	0.936
SMG8	DCP1A	9913.ENSBTAP00000004365	9913.ENSBTAP00000014415	0	0	0	0	0.296	0	0.500	0.366	0.757
SPOP	CUL3	9913.ENSBTAP00000007660	9913.ENSBTAP00000029018	0	0	0	0	0.088	0.819	0.900	0.987	0.999
SRPRA	MRPL3	9913.ENSBTAP00000018762	9913.ENSBTAP00000041336	0	0	0	0	0.127	0.608	0	0.271	0.728
TEK	VEGFD	9913.ENSBTAP00000026836	9913.ENSBTAP00000012474	0	0	0	0	0.068	0.104	0.650	0.572	0.858
TEK	VWF	9913.ENSBTAP00000026836	9913.ENSBTAP00000016273	0	0	0	0	0.191	0	0	0.744	0.784
TF	HPX	9913.ENSBTAP00000009564	9913.ENSBTAP00000004635	0	0	0	0	0.155	0.067	0	0.697	0.741
TF	A2M	9913.ENSBTAP00000009564	9913.ENSBTAP00000006167	0	0	0	0	0.082	0	0	0.795	0.804
TF	ORM1	9913.ENSBTAP00000009564	9913.ENSBTAP00000022991	0	0	0	0	0.190	0.064	0	0.643	0.706
TF	HP	9913.ENSBTAP00000009564	9913.ENSBTAP00000071329	0	0	0	0	0.156	0.064	0	0.744	0.780
TF	SERPINA1	9913.ENSBTAP00000009564	9913.ENSBTAP00000065816	0	0	0	0	0.306	0.067	0	0.693	0.784
TF	ALB	9913.ENSBTAP00000009564	9913.ENSBTAP00000022763	0	0	0	0	0.522	0	0	0.835	0.918
TGFB2	LTBP2	9913.ENSBTAP00000064427	9913.ENSBTAP00000029274	0	0	0	0	0.055	0.063	0	0.762	0.771
TNKS	TNKS1BP1	9913.ENSBTAP00000001917	9913.ENSBTAP00000070521	0	0	0	0	0	0.191	0	0.788	0.821
TNKS1BP1	TNKS	9913.ENSBTAP00000070521	9913.ENSBTAP00000001917	0	0	0	0	0	0.191	0	0.788	0.821
TOPBP1	MDC1	9913.ENSBTAP00000059732	9913.ENSBTAP00000035767	0	0	0	0	0.086	0.612	0	0.837	0.937
TRPV1	ALB	9913.ENSBTAP00000025131	9913.ENSBTAP00000022763	0	0	0	0	0	0	0	0.814	0.814
TRPV1	KNG1	9913.ENSBTAP00000025131	9913.ENSBTAP00000048995	0	0	0	0	0	0	0	0.776	0.776
TTK	ASPM	9913.ENSBTAP00000045797	9913.ENSBTAP00000010340	0	0	0	0	0.925	0	0	0.585	0.967
TTK	WDHD1	9913.ENSBTAP00000045797	9913.ENSBTAP00000025453	0	0	0	0	0.728	0	0	0.211	0.776
UBR4	HUWE1	9913.ENSBTAP00000020277	9913.ENSBTAP00000008060	0	0	0	0	0.535	0	0	0.770	0.888
UBR4	DYNC1H1	9913.ENSBTAP00000020277	9913.ENSBTAP00000070205	0	0	0	0	0.706	0	0	0.283	0.780
USH2A	PCDH15	9913.ENSBTAP00000053495	9913.ENSBTAP00000071726	0	0	0	0	0.086	0	0	0.856	0.863
VEGFD	EPHA2	9913.ENSBTAP00000012474	9913.ENSBTAP00000001080	0	0	0	0	0.058	0.078	0.650	0.166	0.712
VEGFD	PDGFRB	9913.ENSBTAP00000012474	9913.ENSBTAP00000064374	0	0	0	0	0	0.131	0.650	0.505	0.836
VEGFD	TEK	9913.ENSBTAP00000012474	9913.ENSBTAP00000026836	0	0	0	0	0.068	0.104	0.650	0.572	0.858
VLDLR	RELN	9913.ENSBTAP00000067110	9913.ENSBTAP00000004768	0	0	0	0	0	0.689	0.900	0.897	0.996
VLDLR	CLU	9913.ENSBTAP00000067110	9913.ENSBTAP00000007324	0	0	0	0	0	0.115	0.540	0.602	0.824
VLDLR	APOB	9913.ENSBTAP00000067110	9913.ENSBTAP00000038799	0	0	0	0	0	0.105	0.540	0.598	0.820
VTN	CLU	9913.ENSBTAP00000021497	9913.ENSBTAP00000007324	0	0	0	0	0.088	0.052	0	0.831	0.841
VTN	FN1	9913.ENSBTAP00000021497	9913.ENSBTAP00000010925	0	0	0	0	0.094	0	0	0.874	0.881
VTN	VWF	9913.ENSBTAP00000021497	9913.ENSBTAP00000016273	0	0	0	0	0.100	0.051	0	0.869	0.879
VTN	ITIH2	9913.ENSBTAP00000021497	9913.ENSBTAP00000018701	0	0	0	0	0.762	0.061	0	0.268	0.822
VTN	C9	9913.ENSBTAP00000021497	9913.ENSBTAP00000021495	0	0	0	0	0.290	0	0.500	0.614	0.851
VTN	ITGB4	9913.ENSBTAP00000021497	9913.ENSBTAP00000074469	0	0	0	0	0	0.104	0	0.748	0.765
VTN	ALB	9913.ENSBTAP00000021497	9913.ENSBTAP00000022763	0	0	0	0	0.442	0.055	0	0.889	0.936
VWF	PDGFRB	9913.ENSBTAP00000016273	9913.ENSBTAP00000064374	0	0	0	0	0.159	0.047	0	0.674	0.716
VWF	TEK	9913.ENSBTAP00000016273	9913.ENSBTAP00000026836	0	0	0	0	0.191	0	0	0.744	0.784
VWF	ALB	9913.ENSBTAP00000016273	9913.ENSBTAP00000022763	0	0	0	0	0	0	0	0.835	0.835
VWF	VTN	9913.ENSBTAP00000016273	9913.ENSBTAP00000021497	0	0	0	0	0.100	0.051	0	0.869	0.879
VWF	F10	9913.ENSBTAP00000016273	9913.ENSBTAP00000021789	0	0	0	0	0	0	0.900	0.350	0.932
WDHD1	TTK	9913.ENSBTAP00000025453	9913.ENSBTAP00000045797	0	0	0	0	0.728	0	0	0.211	0.776
ZFYVE1	PIK3C3	9913.ENSBTAP00000014664	9913.ENSBTAP00000057256	0	0	0	0	0	0	0	0.715	0.715
